# Supplementary material for: FlgI Is a Sec-Dependent Effector of Candidatus Liberibacter asiaticus That Can Be Blocked by Small Molecules Identified Using a Yeast Screen
Source: MDPI journal article supplement (doi:10.3390/plants13020318), 2024-01-21
Supplement: s1 [file s1]

**Supplementary Table 3.** Sequences of oligonucleotides used for RT-qPCR

| <b>Primers</b> | <b>Sequences of oligonucleotides (5'-3')</b> |
|----------------|----------------------------------------------|
| RbohB-F:       | TTTCTCTGAGGTTTGCCAGCCACCACCTAA               |
| RbohB-R:       | GCCTTCATGTTGTTGACAATGTCTTTAACA               |
| WIPK-F:        | CCGATCTGCCCCGTTCCATCC                        |
| WIPK-R:        | TCAGGATTCAGCGACAAAGCTTCC                     |
| Plasto-F:      | ATCCCATACAAGACGCTAAAACAA                     |
| Plasto-R:      | GCTAACCCGCCTACACG                            |
| BAK1-F         | TGAACGGTTGCTTGTTTATCCATAT                    |
| BAK1-R         | CAGAGAAGAGCTACCCGAATAAG                      |
| SGT1-F         | CAGAGGAGGTGGTGGTGA CTATA                     |
| SGT1-R         | GGAGGGCTTCCTTCGACCTTCTTTG                    |
| EF1a-F         | TTGCCTTGTGGAAGTTTGAGAC                       |
| EF1a-R         | CATACCAGGCTTGAGGACACCAGTT                    |
| FLS2-F         | TCAAATGGTGGATGACTGGA                         |
| FLS2-R         | ATGATATGCTGCTCCCATCC                         |
