# Supplementary material for: FlgI Is a Sec-Dependent Effector of Candidatus Liberibacter asiaticus That Can Be Blocked by Small Molecules Identified Using a Yeast Screen
Source: MDPI journal article supplement (doi:10.3390/plants13020318), 2024-01-21
Supplement: s1 [file s1]

**Supplementary Table 2.** Sequences of oligonucleotides used for amplification putative effectors

| Primers    | Sequences of oligonucleotides (5'-3')                   | Restriction site |
|------------|---------------------------------------------------------|------------------|
| HLB1910-F  | CGCGGATCCATGGACTTTAAACTGCCAAATTTACCTTATAG               | BamHI            |
| HLB1910-R  | CCGGAATTCAGTCACCTTTTGAGCTAGCATAGCTGTC                   | EcoRI            |
| HLB2100-F  | CTTGGTACCGAGCTCGGATCCATGAGACGTGTGGTTGTAACGGGAC          | BamHI            |
| HLB2100-R  | TGCTGGATATCTGCAGAATTCGATATTATCTTGAACTTTCTAAATAC         | EcoRI            |
| HLB2120-F  | CGCGGATCCATGTTACGTTATTTTATATGTTTGTGTTTC                 | BamHI            |
| HLB2120-R  | CCGGAATTCAAATAAAGTATCCACAATTTTCGTTAGAGAG                | EcoRI            |
| HLB2125-F  | CGCGGATCCATGAAAACAGCTGTGCTTCCACGAAAGGTGG                | BamHI            |
| HLB2125-R  | CCGGAATTCGCTTTTTTTTATGCACATGGTGAATTTATTTG               | EcoRI            |
| HLB2130-F  | CGCGGATCCATGATAAATCAAATTTTAGAACCTTTTACATAC              | BamHI            |
| HLB2130-R  | CCGGAATTCTGAGGTTCTGTATTGTTTAGAGAAAAAGAAAAG              | EcoRI            |
| HLB2135-F  | CGCGGATCCATGAGTAGTTTCCTACATTATGTTCTGTTGCC               | BamHI            |
| HLB2135-R  | CCGGAATTCGGCAGTTCTTTTATTGATAATTATTGAATATGC              | EcoRI            |
| HLB3655-F  | CTTGGTACCGAGCTCGGATCCATGACTGAGTTCACAGGTTCTGCGGCGTGC     | BamHI            |
| HLB3655-R  | TGCTGGATATCTGCAGAATTCCTCTGTGCGCCATCTCTTCCAATAAGGTTGC    | EcoRI            |
| HLB3660-F  | CGCGGATCCGTGAAGCACTATAAAGCTTACCCACAAT                   | BamHI            |
| HLB3660-R  | CCGGAATTCTTGCGACTCTCCTCGCAAGTCAATCTGG                   | EcoRI            |
| HLB3720-F  | CGCGGATCCATGGCTGCTAAAGATATTAAGTTGGGTACTGC               | BamHI            |
| HLB3720-R  | CCGGAATTCATCATCATATCCATACCACCCATACCAC                   | EcoRI            |
| HLB3870-F  | CGCGGATCCATGAATAGTGATAAATATTCAGACTTGATG                 | BamHI            |
| HLB3870-R  | CCGGAATTCAATAACTCGAAAATTTAGGTTATCATCATCAAC              | EcoRI            |
| HLB5045-F  | CTTGGTACCGAGCTCGGATCCATGTTGTGCACTATAGTCCCCACTGTTCCCTATC | BamHI            |
| HLB5045-R  | TGCTGGATATCTGCAGAATTCGAGGCAATCGAGGGATTTGTATGTCCTATAT    | EcoRI            |
| HLB5100-F  | CGCGGATCCATGAATAATACTCTTACTCCCGAATC                     | BamHI            |
| HLB5100-R  | CCGGAATTCTTCTGTTTTCCGACTACCATTTTTCACACG                 | EcoRI            |
| HLB0785-F  | CGCGGATCCATGAGTTTTGAGGGATGTGCAAAAAAGGATTCC              | BamHI            |
| HLB0785-R  | CCGGAATTCTTGTCTCTTTCTTCAATATCAATTCGAGAC                 | EcoRI            |
| HLB1305-F  | CTTGGTACCGAGCTCGGATCCATGATTTTTCGTATAGCTTTTTTGATTTTTTC   | BamHI            |
| HLB1305-R  | TGCTGGATATCTGCAGAATTCCTGAATTATAATCTCTGATTGAAGGGCGCCCCG  | EcoRI            |
| HLB1315-F  | CTTGGTACCGAGCTCGGATCCATGAAAGCATTTATGATCGCAGCAGC         | BamHI            |
| HLB1315-R  | TGCTGGATATCTGCAGAATTCCTCATCTTAGTAATTAAAGAAGACATCTC      | EcoRI            |
| CYC1-R     | GCGTGAATGTAAGCGTGAC                                     | NA               |
| GAL1-F     | AATATACCTCTATACTTTAACGTC                                | NA               |
| mphoA-F    | 5'-TGCCGCGCGGCAGCCATATGCCAGAAATGCCTGTTCTGGAA-3'         | NdeI             |
| phoA-R     | 5'-TGGTGGTGGTGGTGCTCGAGTTATTTTCAGCCCCAGAGCGG-3'         | Xho I            |
| flgISP-F   | 5'-TGCCGCGCGGCAGCCATATGATTTTTTCGTATAGCTTT TTT-3'        | NdeI             |
| flgISP-R   | 5'-TTCCAGAACAGGCATTTCTGGTGCTGATATCTCA TGCAA-3'          | NA               |
| flgI-GFP-F | 5'-TGCTCTAGAATGATTTTTTCGTATAGCTTTTTTGATTTTTTC-3'        | XbaI             |
| flgI-GFP-R | 5'-CGCGGATCCTTGAATTATAATCTCTGATTGAAGGGCGCCCCG-3'        | BamHI            |
| HLB4425-F  | CGCGGATCCATGAAGAAGTATATCACATTATTAAC                     | BamHI            |
| HLB4425-R  | CCGGAATTCCTGGGATCGGTAGTTTCGATAATATCC                    | EcoRI            |
