# Supplementary material for: FlgI Is a Sec-Dependent Effector of Candidatus Liberibacter asiaticus That Can Be Blocked by Small Molecules Identified Using a Yeast Screen
Source: Plants (Basel). 2024 Jan 21;13(2):318. doi: 10.3390/plants13020318 (PMC10819201; doi:10.3390/plants13020318)
Supplement: Supplementary file 1 [file plants-13-00318-s001.zip]

Archive with 4 entries (4 files):
- plants-2783612-Supplementary figures-main.pdf
- Supplementary Table 1.DeepVF_PHI-base..xlsx
- Supplementary Table 2. Sequences of oligonucleotides for amplification putative effectors.pdf
- Supplementary Table 3. Sequences of oligonucleotides for RT-qPCR.pdf
