# Supplementary material for: FlgI Is a Sec-Dependent Effector of Candidatus Liberibacter asiaticus That Can Be Blocked by Small Molecules Identified Using a Yeast Screen
Source: Plants (Basel). 2024 Jan 21;13(2):318. doi: 10.3390/plants13020318 (PMC10819201; doi:10.3390/plants13020318)
Supplement: Supplementary file 1 [file plants-13-00318-s001.zip › Supplementary Table 1.DeepVF_PHI-base..xlsx]

## Sheet: Sheet1
# CLas protein_id	# DeepVF score	# DeepVF prediction	# PHI-base best-hit	# PHI-base best-hit e-value
CLIBASIA_00005	0.882	Yes
CLIBASIA_00010	0.874	Yes
CLIBASIA_00015	0.656	Yes
CLIBASIA_00020	0.845	Yes
CLIBASIA_00025	0.852	Yes
CLIBASIA_00030	0.525	Yes
CLIBASIA_00035	0.16	No
CLIBASIA_00040	0.201	No	I1S0N5#PHI:1552#GzMyb016#5518#Fusarium_graminearum#unaffected_pathogenicity	8e-08
CLIBASIA_00045	0.228	No
CLIBASIA_00050	0.872	Yes	A3M2U3#PHI:7809#AdeN#470#Acinetobacter_baumannii#increased_virulence_(hypervirulence)	4e-08
CLIBASIA_00055	0.257	No
CLIBASIA_00060	0.833	Yes
CLIBASIA_00065	0.201	No
CLIBASIA_00070	0.88	Yes
CLIBASIA_00075	0.829	Yes
CLIBASIA_00080	0.478	No	Q9KT08#PHI:9842#Pta#666#Vibrio_cholerae#unaffected_pathogenicity	8e-18
CLIBASIA_00085	0.63	Yes
CLIBASIA_00090	0.842	Yes	C0RLV2#PHI:11545#B0779#29459#Brucella_melitensis#unaffected_pathogenicity	7e-30
CLIBASIA_00095	0.848	Yes
CLIBASIA_00100	0.682	Yes
CLIBASIA_00105	0.567	Yes	A0A346FLS9#PHI:11276#FgRbp1#5518#Fusarium_graminearum#reduced_virulence	3e-06
CLIBASIA_00110	0.855	Yes	A3M1G3#PHI:7860#RpoB#470#Acinetobacter_baumannii#reduced_virulence	0
CLIBASIA_00115	0.766	Yes	P9WHE3#PHI:7583#Rv0652_(rplL)#1773#Mycobacterium_tuberculosis#increased_virulence_(hypervirulence)	4e-09
CLIBASIA_00120	0.786	Yes
CLIBASIA_00125	0.846	Yes
CLIBASIA_00130	0.824	Yes
CLIBASIA_00135	0.709	Yes
CLIBASIA_00140	0.657	Yes
CLIBASIA_00150	0.637	Yes	W8TRT9#PHI:10282#TufA#1280#Staphylococcus_aureus#increased_virulence_(hypervirulence)__unaffected_pathogenicity	7e-150
CLIBASIA_00160	0.258	No
CLIBASIA_00175	0.176	No
CLIBASIA_00180	0.828	Yes
CLIBASIA_00185	0.855	Yes
CLIBASIA_00190	0.851	Yes
CLIBASIA_00195	0.258	No	Q02RX2#PHI:3915#SuhB#287#Pseudomonas_aeruginosa#loss_of_pathogenicity	6e-47
CLIBASIA_00200	0.777	Yes	Q92210#PHI:196#ADE2#5476#Candida_albicans#reduced_virulence	1e-43
CLIBASIA_00205	0.821	Yes	Q6GAE8#PHI:10553#PurK#1280#Staphylococcus_aureus#reduced_virulence	7e-64
CLIBASIA_00210	0.842	Yes
CLIBASIA_00215	0.861	Yes
CLIBASIA_00220	0.329	No
CLIBASIA_00225	0.855	Yes
CLIBASIA_00230	0.88	Yes	E0SMW9#PHI:8569#ClpA_(Dda3937_02363)#204038#Dickeya_dadantii#reduced_virulence	0
CLIBASIA_00235	0.84	Yes	E0SMW8#PHI:8568#ClpS#204038#Dickeya_dadantii#reduced_virulence	3e-26
CLIBASIA_00240	0.855	Yes
CLIBASIA_00245	0.222	No
CLIBASIA_00250	0.788	Yes
CLIBASIA_00255	0.225	No	I1RIL9#PHI:8803#FgShyC_(FGSG_03657)#5518#Fusarium_graminearum#unaffected_pathogenicity	1e-18
CLIBASIA_00260	0.79	Yes
CLIBASIA_00265	0.755	Yes	C0RM94#PHI:11546#B0934#29459#Brucella_melitensis#unaffected_pathogenicity	4e-123
CLIBASIA_00270	0.663	Yes	Q9K034#PHI:8622#Ctp_(NMB0788)#487#Neisseria_meningitidis#unaffected_pathogenicity	9e-16
CLIBASIA_00275	0.62	Yes	Q9K034#PHI:8622#Ctp_(NMB0788)#487#Neisseria_meningitidis#unaffected_pathogenicity	5e-19
CLIBASIA_00280	0.729	Yes	Q9K033#PHI:8623#Cab_(NMB0789)#487#Neisseria_meningitidis#unaffected_pathogenicity	1e-77
CLIBASIA_00285	0.196	No
CLIBASIA_00290	0.805	Yes
CLIBASIA_00295	0.863	Yes
CLIBASIA_00300	0.788	Yes
CLIBASIA_00305	0.807	Yes
CLIBASIA_00310	0.846	Yes
CLIBASIA_00315	0.74	Yes
CLIBASIA_00320	0.784	Yes
CLIBASIA_00325	0.864	Yes	Q75WC5#PHI:824__PHI:6838#GyrA#337#Burkholderia_glumae#chemistry_target:_sensitivity_to_chemical__chemistry_target:_resistance_to_chemical__reduced_virulence__loss_of_pathogenicity	0
CLIBASIA_00330	0.865	Yes	Q5H2X8#PHI:2737#SSBX#347#Xanthomonas_oryzae#reduced_virulence	2e-27
CLIBASIA_00335	0.868	Yes	Q9K033#PHI:8623#Cab_(NMB0789)#487#Neisseria_meningitidis#unaffected_pathogenicity	5e-08
CLIBASIA_00340	0.882	Yes	P0A1P6#PHI:7742#GlnA#28901#Salmonella_enterica#reduced_virulence	4e-134
CLIBASIA_00345	0.812	Yes
CLIBASIA_00350	0.843	Yes
CLIBASIA_00355	0.769	Yes
CLIBASIA_00370	0.8	Yes
CLIBASIA_00375	0.846	Yes	Q8ZPL7#PHI:10048#FumC#28901#Salmonella_enterica#reduced_virulence	0
CLIBASIA_00380	0.782	Yes
CLIBASIA_00385	0.789	Yes	A3M645#PHI:10380#RecA#470#Acinetobacter_baumannii#reduced_virulence	8e-163
CLIBASIA_00390	0.841	Yes	A0A086VCI7#PHI:6912#YbtP#562#Escherichia_coli#reduced_virulence	4e-58
CLIBASIA_00395	0.588	Yes
CLIBASIA_00400	0.838	Yes
CLIBASIA_00405	0.857	Yes
CLIBASIA_00410	0.62	Yes
CLIBASIA_00415	0.835	Yes
CLIBASIA_00420	0.882	Yes
CLIBASIA_00425	0.194	No	Q5NFT3#PHI:4734#HemH#263#Francisella_tularensis#unaffected_pathogenicity	2e-96
CLIBASIA_00430	0.432	No	A0A0K0GQ25#PHI:7967#PXO_03177#347#Xanthomonas_oryzae#reduced_virulence	5e-22
CLIBASIA_00435	0.634	Yes
CLIBASIA_00440	0.823	Yes
CLIBASIA_00445	0.839	Yes
CLIBASIA_00450	0.211	No	F9XNZ8#PHI:8592#ZtPpt#1047171#Zymoseptoria_tritici#loss_of_pathogenicity	1e-27
CLIBASIA_00455	0.855	Yes	Q4UZD3#PHI:3942#XC_0509#339#Xanthomonas_campestris#reduced_virulence	5e-133
CLIBASIA_00460	0.853	Yes
CLIBASIA_00465	0.772	Yes
CLIBASIA_00470	0.831	Yes
CLIBASIA_00475	0.799	Yes
CLIBASIA_00480	0.794	Yes
CLIBASIA_00485	0.835	Yes	G4MXC5#PHI:5190#MoPRX1#318829#Magnaporthe_oryzae#reduced_virulence	6e-11
CLIBASIA_00490	0.809	Yes
CLIBASIA_00495	0.174	No
CLIBASIA_00500	0.35	No	G4Z2B4#PHI:3071#PsTatD4#67593#Phytophthora_sojae#reduced_virulence	2e-12
CLIBASIA_00505	0.249	No
CLIBASIA_00510	0.747	Yes
CLIBASIA_00515	0.304	No
CLIBASIA_00520	0.882	Yes
CLIBASIA_00525	0.881	Yes
CLIBASIA_00530	0.876	Yes
CLIBASIA_00535	0.881	Yes
CLIBASIA_00540	0.274	No
CLIBASIA_00545	0.417	No
CLIBASIA_00550	0.175	No
CLIBASIA_00555	0.832	Yes
CLIBASIA_00560	0.853	Yes	D4HUC7#PHI:9309#PfkA#552#Erwinia_amylovora#reduced_virulence	4e-11
CLIBASIA_00565	0.5	No
CLIBASIA_00570	0.867	Yes
CLIBASIA_00575	0.377	No
CLIBASIA_00580	0.566	Yes
CLIBASIA_00585	0.266	No
CLIBASIA_00590	0.84	Yes	A0A380PIP1#PHI:11030#BipA#632#Yersinia_pestis#reduced_virulence	0
CLIBASIA_00595	0.855	Yes	D4HUG4#PHI:9316#ArgG#552#Erwinia_amylovora#reduced_virulence	2e-118
CLIBASIA_00600	0.842	Yes
CLIBASIA_00605	0.517	Yes
CLIBASIA_00610	0.854	Yes
CLIBASIA_00615	0.63	Yes
CLIBASIA_00620	0.617	Yes
CLIBASIA_00625	0.849	Yes
CLIBASIA_00630	0.755	Yes	Q8Y448#PHI:5257#SecY#1639#Listeria_monocytogenes#increased_virulence_(hypervirulence)	2e-105
CLIBASIA_00635	0.51	Yes
CLIBASIA_00640	0.372	No
CLIBASIA_00645	0.466	No
CLIBASIA_00650	0.511	Yes
CLIBASIA_00655	0.712	Yes
CLIBASIA_00660	0.288	No
CLIBASIA_00665	0.535	Yes
CLIBASIA_00670	0.786	Yes
CLIBASIA_00675	0.304	No
CLIBASIA_00680	0.504	Yes	Q7VTC1#PHI:11120#RplN#520#Bordetella_pertussis#unaffected_pathogenicity__increased_virulence_(hypervirulence)	5e-46
CLIBASIA_00685	0.255	No
CLIBASIA_00690	0.784	Yes
CLIBASIA_00695	0.672	Yes
CLIBASIA_00700	0.407	No
CLIBASIA_00705	0.557	Yes
CLIBASIA_00710	0.44	No
CLIBASIA_00715	0.723	Yes	I1RCH5#PHI:1569#GzOB009#5518#Fusarium_graminearum#lethal	2e-53
CLIBASIA_00720	0.714	Yes
CLIBASIA_00725	0.711	Yes
CLIBASIA_00730	0.499	No
CLIBASIA_00735	0.785	Yes
CLIBASIA_00740	0.637	Yes	W8TRT9#PHI:10282#TufA#1280#Staphylococcus_aureus#increased_virulence_(hypervirulence)__unaffected_pathogenicity	7e-150
CLIBASIA_00745	0.867	Yes	A0A380PIP1#PHI:11030#BipA#632#Yersinia_pestis#reduced_virulence	2e-20
CLIBASIA_00750	0.802	Yes
CLIBASIA_00755	0.162	No	I1RZ39#PHI:1599#GzOB039#5518#Fusarium_graminearum#unaffected_pathogenicity	3e-36
CLIBASIA_00760	0.659	Yes	Q2KKC1#PHI:8542#OadD#1351#Enterococcus_faecalis#reduced_virulence	8e-07
CLIBASIA_00765	0.852	Yes	I1S2C4#PHI:5068#MCC#5518#Fusarium_graminearum#reduced_virulence	4e-97
CLIBASIA_00770	0.642	Yes
CLIBASIA_00775	0.863	Yes	Q2YPX3#PHI:8922#Lon#235#Brucella_abortus#unaffected_pathogenicity__reduced_virulence	0
CLIBASIA_00780	0.688	Yes	Q8PBY5#PHI:9833#ClpX#339#Xanthomonas_campestris#reduced_virulence	0
CLIBASIA_00785	0.41	No	P0A1D7#PHI:3040#ClpP#28901#Salmonella_enterica#reduced_virulence	2e-99
CLIBASIA_00790	0.804	Yes	P0A9X1#PHI:11007#ZnuC#562#Escherichia_coli#reduced_virulence	2e-18
CLIBASIA_00795	0.239	No
CLIBASIA_00800	0.178	No	P66860#PHI:7002#SmpB#1639#Listeria_monocytogenes#reduced_virulence	8e-42
CLIBASIA_00805	0.192	No
CLIBASIA_00810	0.795	Yes
CLIBASIA_00815	0.216	No	Q4URJ2#PHI:3954#XC_3287#339#Xanthomonas_campestris#reduced_virulence	9e-10
CLIBASIA_00820	0.604	Yes
CLIBASIA_00825	0.326	No
CLIBASIA_00830	0.837	Yes
CLIBASIA_00835	0.864	Yes	Q2YRP4#PHI:5012#VtlR#235#Brucella_abortus#reduced_virulence	3e-113
CLIBASIA_00840	0.418	No	J5K974#PHI:6470#Trr1#176275#Beauveria_bassiana#unaffected_pathogenicity	1e-85
CLIBASIA_00845	0.882	Yes
CLIBASIA_00850	0.845	Yes
CLIBASIA_00855	0.843	Yes
CLIBASIA_00860	0.717	Yes
CLIBASIA_00865	0.875	Yes	Q51380#PHI:4900#Crc#287#Pseudomonas_aeruginosa#reduced_virulence	4e-21
CLIBASIA_00870	0.882	Yes	O51804#PHI:9841#RpoS#666#Vibrio_cholerae#unaffected_pathogenicity	6e-63
CLIBASIA_00875	0.593	Yes	A0A0H2ZFF9#PHI:10607#FadD6_(PA14_13110)#287#Pseudomonas_aeruginosa#unaffected_pathogenicity	9e-29
CLIBASIA_00880	0.865	Yes
CLIBASIA_00885	0.667	Yes
CLIBASIA_00890	0.643	Yes
CLIBASIA_00895	0.731	Yes	G5EH72#PHI:5233#MoARG5_6#318829#Magnaporthe_oryzae#loss_of_pathogenicity	1e-22
CLIBASIA_00900	0.305	No
CLIBASIA_00905	0.775	Yes	A6QGB6#PHI:3999#FMT#1280#Staphylococcus_aureus#reduced_virulence	9e-54
CLIBASIA_00910	0.173	No
CLIBASIA_00915	0.823	Yes
CLIBASIA_00920	0.315	No	Q9I610#PHI:10608#PA0508#287#Pseudomonas_aeruginosa#unaffected_pathogenicity	3e-13
CLIBASIA_00925	0.752	Yes	A0A0H2XHH2#PHI:2634#ArgF#1280#Staphylococcus_aureus#unaffected_pathogenicity	3e-10
CLIBASIA_00930	0.822	Yes
CLIBASIA_00935	0.517	Yes
CLIBASIA_00940	0.771	Yes
CLIBASIA_00945	0.646	Yes
CLIBASIA_00950	0.867	Yes
CLIBASIA_00955	0.789	Yes
CLIBASIA_00960	0.833	Yes	Q4WCZ1#PHI:2969#ArgEF#746128#Aspergillus_fumigatus#reduced_virulence	7e-07
CLIBASIA_00965	0.311	No	Q8PHM6#PHI:8773#MltB2.2_(XAC_RS16355)#346#Xanthomonas_citri#unaffected_pathogenicity	3e-28
CLIBASIA_00970	0.287	No
CLIBASIA_00975	0.426	No
CLIBASIA_00980	0.194	No
CLIBASIA_00985	0.372	No	A0A0K0GME1#PHI:8987#PXO_RS15740#347#Xanthomonas_oryzae#unaffected_pathogenicity	1e-12
CLIBASIA_00990	0.821	Yes
CLIBASIA_00995	0.706	Yes
CLIBASIA_01000	0.813	Yes
CLIBASIA_01005	0.299	No
CLIBASIA_01010	0.823	Yes
CLIBASIA_01015	0.742	Yes
CLIBASIA_01020	0.21	No
CLIBASIA_01025	0.645	Yes
CLIBASIA_01030	0.825	Yes	A0A380PIP1#PHI:11030#BipA#632#Yersinia_pestis#reduced_virulence	8e-43
CLIBASIA_01035	0.174	No
CLIBASIA_01040	0.772	Yes
CLIBASIA_01045	0.832	Yes
CLIBASIA_01050	0.171	No	Q9HW06#PHI:10781#PA4400#287#Pseudomonas_aeruginosa#reduced_virulence	3e-23
CLIBASIA_01055	0.864	Yes	Q4WUE0#PHI:10405#ArgJ_(AFUA_5G08120)#746128#Aspergillus_fumigatus#reduced_virulence	2e-64
CLIBASIA_01060	0.87	Yes	A0A059ZR97#PHI:5240#SecA#470#Acinetobacter_baumannii#reduced_virulence	0
CLIBASIA_01065	0.645	Yes	Q7YZA8#PHI:2589#TcGALE#5693#Trypanosoma_cruzi#lethal	2e-63
CLIBASIA_01070	0.713	Yes
CLIBASIA_01075	0.754	Yes
CLIBASIA_01080	0.338	No
CLIBASIA_01085	0.879	Yes
CLIBASIA_01090	0.281	No	A0KL98#PHI:11459#Alr-2#644#Aeromonas_hydrophila#reduced_virulence	3e-44
CLIBASIA_01095	0.826	Yes	A3MZ94#PHI:3533#LonA#715#Actinobacillus_pleuropneumoniae#reduced_virulence	9e-06
CLIBASIA_01100	0.263	No
CLIBASIA_01105	0.852	Yes	E0SL85#PHI:8573#PurF_(Dda3937_02099)#204038#Dickeya_dadantii#reduced_virulence	9e-92
CLIBASIA_01110	0.173	No	Q8Y0J2#PHI:5271#FabG1#305#Ralstonia_solanacearum#lethal	4e-21
CLIBASIA_01115	0.583	Yes
CLIBASIA_01120	0.875	Yes
CLIBASIA_01125	0.805	Yes	A0A086IQC3#PHI:8968#ProV#573#Klebsiella_pneumoniae#reduced_virulence	1e-70
CLIBASIA_01130	0.195	No	Q8DPC4#PHI:6321#PotC#1313#Streptococcus_pneumoniae#reduced_virulence	7e-06
CLIBASIA_01135	0.185	No
CLIBASIA_01140	0.175	No	A0A0H3MZ24#PHI:7249#MntE#1307#Streptococcus_suis#reduced_virulence	3e-16
CLIBASIA_01145	0.807	Yes
CLIBASIA_01150	0.167	No
CLIBASIA_01155	0.496	No	Q9UVT8#PHI:11240#MoMca1_(MGG_04626)#318829#Magnaporthe_oryzae#reduced_virulence	4e-07
CLIBASIA_01160	0.578	Yes
CLIBASIA_01165	0.19	No
CLIBASIA_01170	0.86	Yes	C5BEV2#PHI:2962#GlyA#67780#Edwardsiella_ictaluri#reduced_virulence	3e-142
CLIBASIA_01175	0.752	Yes
CLIBASIA_01180	0.859	Yes
CLIBASIA_01185	0.758	Yes
CLIBASIA_01190	0.864	Yes	Q75WC4#PHI:852#GyrA#337#Burkholderia_glumae#chemistry_target:_resistance_to_chemical__chemistry_target:_sensitivity_to_chemical	2e-120
CLIBASIA_01195	0.813	Yes
CLIBASIA_01200	0.658	Yes
CLIBASIA_01205	0.449	No
CLIBASIA_01210	0.33	No
CLIBASIA_01215	0.172	No	O05791#PHI:7751#Rv3114#1773#Mycobacterium_tuberculosis#reduced_virulence__unaffected_pathogenicity	5e-06
CLIBASIA_01220	0.183	No
CLIBASIA_01225	0.173	No	W8U4S5#PHI:10293__PHI:10292#CtaB#1280#Staphylococcus_aureus#unaffected_pathogenicity__increased_virulence_(hypervirulence)	2e-35
CLIBASIA_01230	0.17	No
CLIBASIA_01235	0.4	No	P13738#PHI:3266#NhaA#562#Escherichia_coli#reduced_virulence	1e-72
CLIBASIA_01240	0.219	No
CLIBASIA_01245	0.173	No
CLIBASIA_01250	0.833	Yes	Q8P8Q1#PHI:3112#GalU#339#Xanthomonas_campestris#loss_of_pathogenicity	5e-74
CLIBASIA_01255	0.268	No
CLIBASIA_01260	0.173	No
CLIBASIA_01265	0.177	No	A0A0F6AZ25#PHI:7211#STM14_1002#28901#Salmonella_enterica#reduced_virulence	1e-68
CLIBASIA_01270	0.203	No	A0A0F6AZ26#PHI:7212#STM14_1003#28901#Salmonella_enterica#reduced_virulence	2e-80
CLIBASIA_01275	0.864	Yes	Q2FIB5#PHI:2632#ArgH#1280#Staphylococcus_aureus#reduced_virulence	5e-153
CLIBASIA_01280	0.856	Yes	E0SEI0#PHI:8581#LysA_(Dda3937_02577)#204038#Dickeya_dadantii#reduced_virulence	8e-46
CLIBASIA_01285	0.855	Yes	A0A0F6B111#PHI:10149#STM14_RS07950_(ssaR)#28901#Salmonella_enterica#reduced_virulence	1e-41
CLIBASIA_01290	0.754	Yes
CLIBASIA_01295	0.882	Yes
CLIBASIA_01300	0.857	Yes
CLIBASIA_01305	0.853	Yes
CLIBASIA_01310	0.842	Yes
CLIBASIA_01315	0.88	Yes
CLIBASIA_01320	0.862	Yes
CLIBASIA_01325	0.871	Yes
CLIBASIA_01330	0.882	Yes
CLIBASIA_01335	0.449	No	Q8Y8N0#PHI:6510__PHI:7620#CshA__Lmo0866#1639#Listeria_monocytogenes#unaffected_pathogenicity__increased_virulence_(hypervirulence)	3e-95
CLIBASIA_01340	0.209	No
CLIBASIA_01345	0.877	Yes	V5XVU3#PHI:4073#Ser#615#Serratia_marcescens#reduced_virulence	2e-31
CLIBASIA_01350	0.785	Yes	Q5WWE3#PHI:4975#LssB#446#Legionella_pneumophila#reduced_virulence	2e-26
CLIBASIA_01355	0.776	Yes
CLIBASIA_01360	0.804	Yes
CLIBASIA_01365	0.87	Yes
CLIBASIA_01370	0.824	Yes
CLIBASIA_01375	0.788	Yes	Q59636#PHI:6438#Ndk#287#Pseudomonas_aeruginosa#increased_virulence_(hypervirulence)	3e-52
CLIBASIA_01380	0.52	Yes
CLIBASIA_01385	0.193	No
CLIBASIA_01390	0.3	No
CLIBASIA_01395	0.328	No
CLIBASIA_01400	0.852	Yes	P31554#PHI:10312#LptD#562#Escherichia_coli#increased_virulence_(hypervirulence)__unaffected_pathogenicity	7e-08
CLIBASIA_01405	0.382	No
CLIBASIA_01410	0.813	Yes
CLIBASIA_01415	0.16	No	C6DEY6#PHI:10573#RsmA#554#Pectobacterium_carotovorum#unaffected_pathogenicity	2e-48
CLIBASIA_01420	0.791	Yes	J9VQQ5#PHI:7208#Mlh1#5207#Cryptococcus_neoformans#unaffected_pathogenicity	1e-53
CLIBASIA_01425	0.323	No
CLIBASIA_01430	0.62	Yes
CLIBASIA_01435	0.853	Yes	Q9HUH7#PHI:7635#WaaA#287#Pseudomonas_aeruginosa#unaffected_pathogenicity__reduced_virulence	7e-62
CLIBASIA_01440	0.844	Yes
CLIBASIA_01445	0.303	No	Q02RX2#PHI:3915#SuhB#287#Pseudomonas_aeruginosa#loss_of_pathogenicity	1e-11
CLIBASIA_01450	0.21	No
CLIBASIA_01455	0.217	No
CLIBASIA_01460	0.8	Yes
CLIBASIA_01465	0.41	No
CLIBASIA_01470	0.848	Yes	Q5NH02#PHI:4732#FTT0673p/prsAp#263#Francisella_tularensis#unaffected_pathogenicity	2e-109
CLIBASIA_01475	0.188	No
CLIBASIA_01480	0.794	Yes
CLIBASIA_01485	0.865	Yes
CLIBASIA_01490	0.882	Yes	Q8Z445#PHI:562#BarA#28901#Salmonella_enterica#unaffected_pathogenicity	8e-32
CLIBASIA_01495	0.861	Yes	J9VUY6#PHI:6871#Gua1#5207#Cryptococcus_neoformans#loss_of_pathogenicity	3e-168
CLIBASIA_01500	0.197	No	Q882D7#PHI:3118#PSPTO_2691#317#Pseudomonas_syringae#unaffected_pathogenicity	6e-53
CLIBASIA_01505	0.201	No
CLIBASIA_01510	0.845	Yes	P9WJG3#PHI:7578#CarD#1773#Mycobacterium_tuberculosis#reduced_virulence	5e-19
CLIBASIA_01515	0.422	No	C6DEJ2#PHI:7469#RplY#554#Pectobacterium_carotovorum#reduced_virulence	7e-09
CLIBASIA_01520	0.849	Yes	I1S216#PHI:1605#GzOB046#5518#Fusarium_graminearum#unaffected_pathogenicity	1e-13
CLIBASIA_01525	0.849	Yes	D4I0H1#PHI:9328#CarA#552#Erwinia_amylovora#reduced_virulence	2e-115
CLIBASIA_01530	0.598	Yes
CLIBASIA_01535	0.197	No	A4VWD1#PHI:9270__PHI:11090#MnmE#1307#Streptococcus_suis#reduced_virulence	6e-14
CLIBASIA_01540	0.854	Yes	G4NCL5#PHI:877#MGG_00383#318829#Magnaporthe_oryzae#reduced_virulence	1e-87
CLIBASIA_01545	0.686	Yes
CLIBASIA_01550	0.194	No	Q9ZI86#PHI:3782#PA3984#287#Pseudomonas_aeruginosa#reduced_virulence	5e-15
CLIBASIA_01555	0.173	No
CLIBASIA_01560	0.635	Yes	Q2YQS6#PHI:9125#YbeY_(bab1_2156)#235#Brucella_abortus#reduced_virulence	1e-44
CLIBASIA_01565	0.213	No
CLIBASIA_01570	0.178	No	A0A165G9C3#PHI:6870#YeaZ#669#Vibrio_harveyi#reduced_virulence	9e-16
CLIBASIA_01575	0.774	Yes	Q2FID9#PHI:3348#Nfu#1280#Staphylococcus_aureus#reduced_virulence	3e-13
CLIBASIA_01580	0.853	Yes
CLIBASIA_01585	0.226	No	D4I307#PHI:3126__PHI:9305#ArgD#552#Erwinia_amylovora#loss_of_pathogenicity__reduced_virulence__unaffected_pathogenicity	4e-107
CLIBASIA_01590	0.822	Yes	Q725C8#PHI:9501#AguB_(LMOf2365_0045)#1639#Listeria_monocytogenes#reduced_virulence	7e-67
CLIBASIA_01595	0.549	Yes	Q4D3W2#PHI:2575__PHI:2596#DHOD#5693#Trypanosoma_cruzi#lethal	2e-09
CLIBASIA_01600	0.766	Yes
CLIBASIA_01605	0.356	No	S7WCF1#PHI:10890#Spy_(TGGT1_273500)#5811#Toxoplasma_gondii#unaffected_pathogenicity	7e-16
CLIBASIA_01610	0.791	Yes
CLIBASIA_01615	0.848	Yes
CLIBASIA_01620	0.867	Yes
CLIBASIA_01625	0.667	Yes	P64281#PHI:7130#GreA#28901#Salmonella_enterica#loss_of_pathogenicity	3e-47
CLIBASIA_01630	0.182	No	Q9X4V1#PHI:6139#Cps2G#1307#Streptococcus_suis#reduced_virulence	3e-17
CLIBASIA_01635	0.834	Yes	Q2YRY5#PHI:6684__PHI:9762#Pyk__PykM_(BAB1_1761)#235__29459#Brucella_abortus__Brucella_melitensis#reduced_virulence	0
CLIBASIA_01640	0.822	Yes
CLIBASIA_01645	0.366	No
CLIBASIA_01650	0.264	No
CLIBASIA_01655	0.851	Yes
CLIBASIA_01660	0.814	Yes
CLIBASIA_01665	0.849	Yes
CLIBASIA_01670	0.842	Yes
CLIBASIA_01675	0.526	Yes	A0A0K0GME1#PHI:8987#PXO_RS15740#347#Xanthomonas_oryzae#unaffected_pathogenicity	7e-66
CLIBASIA_01680	0.867	Yes	Q4WUL6#PHI:362__PHI:2520#LYSF__LYS4#746128#Aspergillus_fumigatus#loss_of_pathogenicity__lethal	8e-31
CLIBASIA_01685	0.769	Yes	A0A063C0A1#PHI:9163#UvBI-1#1159556#Ustilaginoidea_virens#loss_of_pathogenicity	1e-06
CLIBASIA_01690	0.815	Yes
CLIBASIA_01695	0.87	Yes
CLIBASIA_01700	0.862	Yes
CLIBASIA_01705	0.866	Yes	Q8ZLT3#PHI:3878#Pnp#28901#Salmonella_enterica#reduced_virulence	3e-07
CLIBASIA_01710	0.795	Yes
CLIBASIA_01715	0.791	Yes	Q8E0U0#PHI:11573#AroA#1311#Streptococcus_agalactiae#reduced_virulence	3e-52
CLIBASIA_01720	0.882	Yes
CLIBASIA_01725	0.694	Yes
CLIBASIA_01730	0.736	Yes	I1RSU2#PHI:724__PHI:730#PKS9__KSA1#5518#Fusarium_graminearum#unaffected_pathogenicity	2e-63
CLIBASIA_01735	0.179	No	Q2FZQ3#PHI:7915#FabI#1280#Staphylococcus_aureus#reduced_virulence__unaffected_pathogenicity	1e-59
CLIBASIA_01740	0.882	Yes
CLIBASIA_01745	0.203	No	O25656#PHI:11338#PqqE_(HP1012)#210#Helicobacter_pylori#reduced_virulence__unaffected_pathogenicity	4e-23
CLIBASIA_01750	0.853	Yes	N4VLC7#PHI:9476#CoTHR4_(Cob_04177)#5465#Colletotrichum_orbiculare#reduced_virulence	4e-115
CLIBASIA_01755	0.286	No	A0A1D9ELP8#PHI:8921#EadM#53413#Xanthomonas_axonopodis#reduced_virulence	4e-18
CLIBASIA_01760	0.858	Yes
CLIBASIA_01765	0.469	No	Q8YFR7#PHI:3645__PHI:7184#BpdA#29459#Brucella_melitensis#loss_of_pathogenicity__reduced_virulence	0
CLIBASIA_01770	0.598	Yes
CLIBASIA_01775	0.81	Yes
CLIBASIA_01780	0.493	No
CLIBASIA_01785	0.586	Yes
CLIBASIA_01790	0.765	Yes	A6QFR9#PHI:4038#QoxB#1280#Staphylococcus_aureus#reduced_virulence	0
CLIBASIA_01795	0.701	Yes	Q8PN16#PHI:4147#XAC1258#346#Xanthomonas_citri#reduced_virulence	1e-87
CLIBASIA_01800	0.501	Yes
CLIBASIA_01805	0.727	Yes	O42696#PHI:138#CaNIK1#5476#Candida_albicans#reduced_virulence	4e-20
CLIBASIA_01810	0.244	No
CLIBASIA_01815	0.337	No
CLIBASIA_01820	0.226	No
CLIBASIA_01825	0.315	No
CLIBASIA_01830	0.173	No
CLIBASIA_01835	0.172	No
CLIBASIA_01840	0.859	Yes
CLIBASIA_01845	0.334	No
CLIBASIA_01860	0.834	Yes
CLIBASIA_01865	0.809	Yes	A0A1S7DPR5#PHI:8508#AS87_RS09170_(bioF)#34085#Riemerella_anatipestifer#increased_virulence_(hypervirulence)__reduced_virulence	6e-57
CLIBASIA_01870	0.41	No
CLIBASIA_01875	0.308	No	B5F8I0#PHI:8863#ArgD#28901#Salmonella_enterica#reduced_virulence	3e-41
CLIBASIA_01880	0.284	No	P20582#PHI:3522#PqsD#287#Pseudomonas_aeruginosa#reduced_virulence	8e-39
CLIBASIA_01885	0.19	No
CLIBASIA_01890	0.783	Yes
CLIBASIA_01895	0.77	Yes
CLIBASIA_01900	0.879	Yes
CLIBASIA_01905	0.173	No
CLIBASIA_01910	0.851	Yes	P0A2F4#PHI:11377#SodB#28901#Salmonella_enterica#increased_virulence_(hypervirulence)__reduced_virulence	4e-56
CLIBASIA_01915	0.684	Yes	Q8NL12#PHI:8676#HupB_(XAC1081)#346#Xanthomonas_citri#reduced_virulence	1e-10
CLIBASIA_01920	0.755	Yes	P20582#PHI:3522#PqsD#287#Pseudomonas_aeruginosa#reduced_virulence	3e-55
CLIBASIA_01925	0.705	Yes	X5ELF9#PHI:10347#PlsX#1280#Staphylococcus_aureus#reduced_virulence	4e-63
CLIBASIA_01930	0.386	No
CLIBASIA_01935	0.814	Yes
CLIBASIA_01940	0.688	Yes
CLIBASIA_01945	0.871	Yes
CLIBASIA_01950	0.876	Yes	G5EHD8#PHI:11585#MoGLN3_(MGG_02538)#318829#Magnaporthe_oryzae#unaffected_pathogenicity	2e-48
CLIBASIA_01955	0.695	Yes
CLIBASIA_01960	0.663	Yes
CLIBASIA_01965	0.79	Yes
CLIBASIA_01970	0.88	Yes
CLIBASIA_01975	0.858	Yes
CLIBASIA_01980	0.88	Yes
CLIBASIA_01985	0.882	Yes
CLIBASIA_01990	0.833	Yes
CLIBASIA_01995	0.865	Yes	P40729#PHI:8731#FlhA#28901#Salmonella_enterica#reduced_virulence	6e-120
CLIBASIA_02000	0.84	Yes
CLIBASIA_02005	0.882	Yes
CLIBASIA_02010	0.831	Yes
CLIBASIA_02015	0.158	No
CLIBASIA_02020	0.6	Yes
CLIBASIA_02025	0.78	Yes
CLIBASIA_02030	0.855	Yes	A0A0F6B112#PHI:10150#STM14_RS07955_(ssaS)#28901#Salmonella_enterica#reduced_virulence	2e-11
CLIBASIA_02035	0.882	Yes	G7TFG0#PHI:4650#FliC#347#Xanthomonas_oryzae#unaffected_pathogenicity	1e-10
CLIBASIA_02040	0.675	Yes
CLIBASIA_02045	0.367	No
CLIBASIA_02050	0.857	Yes
CLIBASIA_02055	0.882	Yes	A0A0U1YUA0#PHI:6360#FlgK#553#Pantoea_ananatis#reduced_virulence	2e-10
CLIBASIA_02060	0.882	Yes
CLIBASIA_02065	0.77	Yes	A4K9H6#PHI:1144#PhoP#347#Xanthomonas_oryzae#reduced_virulence	7e-16
CLIBASIA_02070	0.882	Yes
CLIBASIA_02075	0.495	No
CLIBASIA_02080	0.841	Yes	P0AF06#PHI:6534#MotB#562#Escherichia_coli#reduced_virulence	1e-12
CLIBASIA_02085	0.486	No
CLIBASIA_02090	0.866	Yes	P22251#PHI:9292#FlaA#197#Campylobacter_jejuni#reduced_virulence__unaffected_pathogenicity	3e-09
CLIBASIA_02095	0.473	No
CLIBASIA_02100	0.722	Yes	I1RSU2#PHI:724__PHI:730#PKS9__KSA1#5518#Fusarium_graminearum#unaffected_pathogenicity	3e-144
CLIBASIA_02105	0.2	No	O52658#PHI:8556#Acp1_(PA1869)#287#Pseudomonas_aeruginosa#increased_virulence_(hypervirulence)	2e-09
CLIBASIA_02110	0.196	No	Q8Y0J2#PHI:5271#FabG1#305#Ralstonia_solanacearum#lethal	6e-65
CLIBASIA_02115	0.355	No	Q99UN8#PHI:7916#FabD#1280#Staphylococcus_aureus#reduced_virulence	8e-57
CLIBASIA_02120	0.833	Yes	A0A0F6B5S8#PHI:10082#STM14_RS15345#28901#Salmonella_enterica#unaffected_pathogenicity	2e-91
CLIBASIA_02125	0.869	Yes	A0A0F6B5S9#PHI:10083#STM14_RS15350#28901#Salmonella_enterica#unaffected_pathogenicity	2e-90
CLIBASIA_02130	0.635	Yes	A0A0F6B5T0#PHI:10084#STM14_RS15355#28901#Salmonella_enterica#unaffected_pathogenicity	1e-79
CLIBASIA_02135	0.639	Yes	A0A0F6B5T1#PHI:10085#STM14_RS15360#28901#Salmonella_enterica#unaffected_pathogenicity	1e-77
CLIBASIA_02140	0.822	Yes
CLIBASIA_02145	0.868	Yes
CLIBASIA_02150	0.187	No
CLIBASIA_02155	0.851	Yes	Q06951#PHI:703#RfbB#666#Vibrio_cholerae#reduced_virulence	2e-24
CLIBASIA_02160	0.432	No	Q6NF92#PHI:11203#FtsH#1717#Corynebacterium_diphtheriae#unaffected_pathogenicity	9e-161
CLIBASIA_02165	0.21	No
CLIBASIA_02170	0.881	Yes	A0A0H3PAL0#PHI:9291#CadF#197#Campylobacter_jejuni#unaffected_pathogenicity__reduced_virulence	2e-08
CLIBASIA_02175	0.88	Yes	P50601#PHI:3137#TolB#287#Pseudomonas_aeruginosa#reduced_virulence	3e-39
CLIBASIA_02180	0.882	Yes
CLIBASIA_02185	0.814	Yes
CLIBASIA_02190	0.75	Yes	Q3J038#PHI:10834#RSp0672#305#Ralstonia_solanacearum#effector_(plant_avirulence_determinant)	1e-41
CLIBASIA_02195	0.839	Yes	A0A164J6A6#PHI:6447#RarA#573#Klebsiella_pneumoniae#reduced_virulence	3e-09
CLIBASIA_02200	0.829	Yes
CLIBASIA_02205	0.44	No
CLIBASIA_02210	0.691	Yes
CLIBASIA_02215	0.881	Yes
CLIBASIA_02220	0.206	No	Q8YJ71#PHI:4915#InvA#29459#Brucella_melitensis#reduced_virulence	1e-48
CLIBASIA_02225	0.224	No
CLIBASIA_02230	0.769	Yes	Q9K033#PHI:8623#Cab_(NMB0789)#487#Neisseria_meningitidis#unaffected_pathogenicity	1e-35
CLIBASIA_02235	0.785	Yes
CLIBASIA_02240	0.588	Yes
CLIBASIA_02245	0.763	Yes
CLIBASIA_02250	0.693	Yes
CLIBASIA_02255	0.504	Yes
CLIBASIA_02260	0.846	Yes
CLIBASIA_02270	0.202	No
CLIBASIA_02275	0.838	Yes
CLIBASIA_02280	0.769	Yes	I1RFM6#PHI:744#ADE5#5518#Fusarium_graminearum#reduced_virulence	4e-111
CLIBASIA_02285	0.843	Yes	P08179#PHI:8652#PurN#562#Escherichia_coli#unaffected_pathogenicity__reduced_virulence	3e-51
CLIBASIA_02290	0.852	Yes
CLIBASIA_02295	0.859	Yes
CLIBASIA_02300	0.809	Yes
CLIBASIA_02305	0.882	Yes
CLIBASIA_02310	0.173	No
CLIBASIA_02315	0.845	Yes	Q4Q4W3#PHI:5554#LmABCB3#5664#Leishmania_major#reduced_virulence	4e-131
CLIBASIA_02320	0.583	Yes
CLIBASIA_02325	0.605	Yes
CLIBASIA_02330	0.174	No
CLIBASIA_02335	0.271	No	Q9I7C1#PHI:3786#PA0005#287#Pseudomonas_aeruginosa#increased_virulence_(hypervirulence)	8e-29
CLIBASIA_02340	0.837	Yes
CLIBASIA_02345	0.188	No
CLIBASIA_02350	0.179	No	A0A0E0UYV6#PHI:11648#GloB#1639#Listeria_monocytogenes#reduced_virulence__unaffected_pathogenicity	5e-06
CLIBASIA_02355	0.454	No
CLIBASIA_02360	0.787	Yes	Q8RP09#PHI:981#HopI1#317#Pseudomonas_syringae#effector_(plant_avirulence_determinant)	7e-06
CLIBASIA_02365	0.18	No
CLIBASIA_02370	0.235	No
CLIBASIA_02375	0.654	Yes
CLIBASIA_02380	0.808	Yes	A0A1B3X9V1#PHI:7197#Pgp2#197#Campylobacter_jejuni#reduced_virulence	9e-09
CLIBASIA_02385	0.834	Yes
CLIBASIA_02390	0.175	No
CLIBASIA_02395	0.829	Yes
CLIBASIA_02400	0.643	Yes
CLIBASIA_02405	0.193	No
CLIBASIA_02410	0.274	No
CLIBASIA_02415	0.878	Yes	C0RL06#PHI:11542#B0446#29459#Brucella_melitensis#unaffected_pathogenicity	2e-45
CLIBASIA_02420	0.216	No	A0A550KY48#PHI:10342#NtrB#287#Pseudomonas_aeruginosa#unaffected_pathogenicity	6e-08
CLIBASIA_02425	0.708	Yes
CLIBASIA_02430	0.85	Yes
CLIBASIA_02435	0.243	No
CLIBASIA_02440	0.517	Yes	Q837J2#PHI:11494#CshA_(EF0846)#1351#Enterococcus_faecalis#reduced_virulence	7e-66
CLIBASIA_02445	0.24	No	A0A0K0GPI8#PHI:9989#AspC_(PXO_02420)#347#Xanthomonas_oryzae#reduced_virulence	1e-33
CLIBASIA_02450	0.226	No
CLIBASIA_02455	0.795	Yes	Q1L2E2#PHI:595__PHI:2248#ALS1__Als1#13684#Parastagonospora_nodorum#reduced_virulence__loss_of_pathogenicity	2e-132
CLIBASIA_02460	0.268	No	A0A0H3PAK7#PHI:10727#PepP_(CJJ81176_0681)#197#Campylobacter_jejuni#reduced_virulence	1e-96
CLIBASIA_02465	0.558	Yes	Q8YAQ5#PHI:7805#EssC_(lmo0061)#1639#Listeria_monocytogenes#increased_virulence_(hypervirulence)	7e-19
CLIBASIA_02470	0.796	Yes
CLIBASIA_02475	0.498	No
CLIBASIA_02480	0.398	No
CLIBASIA_02485	0.289	No
CLIBASIA_02490	0.869	Yes	O51804#PHI:9841#RpoS#666#Vibrio_cholerae#unaffected_pathogenicity	5e-32
CLIBASIA_02495	0.786	Yes
CLIBASIA_02500	0.859	Yes	P65882#PHI:2625__PHI:9416#PurA#28901#Salmonella_enterica#reduced_virulence__loss_of_pathogenicity	8e-137
CLIBASIA_02505	0.326	No
CLIBASIA_02510	0.864	Yes	A0A160EFI3#PHI:6706#EivC#562#Escherichia_coli#reduced_virulence	1e-42
CLIBASIA_02515	0.843	Yes	A8YY71#PHI:8019#AtpG#1280#Staphylococcus_aureus#reduced_virulence	2e-39
CLIBASIA_02520	0.864	Yes	Q2FWE8#PHI:10773#AtpA#1280#Staphylococcus_aureus#reduced_virulence	0
CLIBASIA_02525	0.462	No
CLIBASIA_02530	0.789	Yes
CLIBASIA_02535	0.156	No	B1MD90#PHI:9736#MAB_3134c#36809#Mycobacteroides_abscessus#reduced_virulence	7e-16
CLIBASIA_02540	0.87	Yes	A9CFS9#PHI:2657#HspL#358#Agrobacterium_tumefaciens#reduced_virulence	2e-60
CLIBASIA_02545	0.844	Yes
CLIBASIA_02550	0.291	No
CLIBASIA_02555	0.18	No	W8TW76#PHI:10294#UbiE#1280#Staphylococcus_aureus#unaffected_pathogenicity	1e-46
CLIBASIA_02560	0.203	No	P9WNC3#PHI:3627#Rv2924c#1773#Mycobacterium_tuberculosis#unaffected_pathogenicity	6e-47
CLIBASIA_02565	0.374	No
CLIBASIA_02570	0.882	Yes
CLIBASIA_02575	0.274	No
CLIBASIA_02580	0.847	Yes
CLIBASIA_02585	0.849	Yes
CLIBASIA_02590	0.821	Yes
CLIBASIA_02595	0.851	Yes
CLIBASIA_02600	0.174	No
CLIBASIA_02605	0.187	No	Q6D000#PHI:2694#RsmB#29471#Pectobacterium_atrosepticum#loss_of_pathogenicity__reduced_virulence	6e-31
CLIBASIA_02610	0.846	Yes
CLIBASIA_02615	0.195	No
CLIBASIA_02620	0.867	Yes	A7U5U4#PHI:2058#LHS1#318829#Magnaporthe_oryzae#reduced_virulence	2e-25
CLIBASIA_02625	0.87	Yes	Q9HV44#PHI:10485#DnaJ#287#Pseudomonas_aeruginosa#reduced_virulence	7e-126
CLIBASIA_02630	0.774	Yes
CLIBASIA_02635	0.745	Yes
CLIBASIA_02640	0.876	Yes
CLIBASIA_02645	0.851	Yes
CLIBASIA_02650	0.799	Yes
CLIBASIA_02655	0.866	Yes
CLIBASIA_02660	0.836	Yes
CLIBASIA_02665	0.601	Yes
CLIBASIA_02670	0.577	Yes
CLIBASIA_02675	0.851	Yes	P0C0B9#PHI:11438#BglB#1314#Streptococcus_pyogenes#increased_virulence_(hypervirulence)__reduced_virulence	8e-06
CLIBASIA_02680	0.364	No
CLIBASIA_02685	0.881	Yes
CLIBASIA_02690	0.734	Yes
CLIBASIA_02695	0.876	Yes	Q4UY20#PHI:3943#XC_0979#339#Xanthomonas_campestris#reduced_virulence	2e-109
CLIBASIA_02700	0.851	Yes
CLIBASIA_02705	0.868	Yes	P0A038#PHI:6904#GAPDH#1280#Staphylococcus_aureus#reduced_virulence	2e-93
CLIBASIA_02710	0.862	Yes	Q8MPM3#PHI:8028#Tkt#5665#Leishmania_mexicana#loss_of_pathogenicity	1e-173
CLIBASIA_02715	0.786	Yes
CLIBASIA_02720	0.795	Yes
CLIBASIA_02725	0.281	No
CLIBASIA_02730	0.652	Yes
CLIBASIA_02735	0.85	Yes
CLIBASIA_02740	0.863	Yes
CLIBASIA_02745	0.865	Yes	H6ULV1#PHI:5450#Gdh2#474922#Colletotrichum_gloeosporioides#reduced_virulence__unaffected_pathogenicity	3e-16
CLIBASIA_02750	0.81	Yes	Q9I730#PHI:9599#PsCA1#287#Pseudomonas_aeruginosa#reduced_virulence	1e-34
CLIBASIA_02755	0.85	Yes
CLIBASIA_02760	0.819	Yes
CLIBASIA_02765	0.209	No	Q6D000#PHI:2694#RsmB#29471#Pectobacterium_atrosepticum#loss_of_pathogenicity__reduced_virulence	8e-51
CLIBASIA_02770	0.829	Yes
CLIBASIA_02775	0.809	Yes
CLIBASIA_02780	0.856	Yes
CLIBASIA_02785	0.85	Yes	A4VWH9#PHI:11234#Eno#1307#Streptococcus_suis#unaffected_pathogenicity	5e-157
CLIBASIA_02790	0.185	No
CLIBASIA_02795	0.801	Yes	S8ENF7#PHI:11455#Pdh-e1alpha#5811#Toxoplasma_gondii#unaffected_pathogenicity	7e-71
CLIBASIA_02800	0.746	Yes	A5IXN3#PHI:4610#PdhB#2110#Mycoplasmopsis_agalactiae#reduced_virulence	4e-53
CLIBASIA_02805	0.317	No	Q2FH26#PHI:7353#OdhB#1280#Staphylococcus_aureus#unaffected_pathogenicity	2e-36
CLIBASIA_02810	0.706	Yes	P9WHH9#PHI:7582#Rv0462_(lpdC)#1773#Mycobacterium_tuberculosis#increased_virulence_(hypervirulence)	8e-104
CLIBASIA_02815	0.875	Yes	Q2FIE9#PHI:9458#LipA_(SAUSA300_0829)#1280#Staphylococcus_aureus#reduced_virulence	5e-98
CLIBASIA_02820	0.391	No
CLIBASIA_02825	0.834	Yes
CLIBASIA_02830	0.882	Yes
CLIBASIA_02835	0.86	Yes
CLIBASIA_02840	0.203	No
CLIBASIA_02845	0.869	Yes
CLIBASIA_02850	0.181	No	Q7CKC8#PHI:9369#NlpD#632#Yersinia_pestis#reduced_virulence	2e-13
CLIBASIA_02855	0.857	Yes	A0A0H3LK50#PHI:9184#BscN#518#Bordetella_bronchiseptica#unaffected_pathogenicity	2e-85
CLIBASIA_02860	0.883	Yes
CLIBASIA_02865	0.716	Yes	A0A0E9B8Z9#PHI:6361#MotA#553#Pantoea_ananatis#reduced_virulence	1e-59
CLIBASIA_02870	0.593	Yes
CLIBASIA_02875	0.873	Yes
CLIBASIA_02880	0.88	Yes
CLIBASIA_02885	0.818	Yes	P76299#PHI:11174#FlhB#562#Escherichia_coli#reduced_virulence	2e-46
CLIBASIA_02890	0.816	Yes
CLIBASIA_02895	0.847	Yes
CLIBASIA_02900	0.841	Yes	Q2YJ50#PHI:7607#VjbR#235#Brucella_abortus#reduced_virulence	6e-10
CLIBASIA_02905	0.868	Yes	Q2YJ50#PHI:7607#VjbR#235#Brucella_abortus#reduced_virulence	2e-07
CLIBASIA_02910	0.872	Yes
CLIBASIA_02915	0.816	Yes	Q9I697#PHI:9281#GshB#287#Pseudomonas_aeruginosa#reduced_virulence	2e-81
CLIBASIA_02920	0.786	Yes
CLIBASIA_02925	0.71	Yes
CLIBASIA_02930	0.845	Yes
CLIBASIA_02935	0.441	No	B8F6T4#PHI:6358#HtrA#738#Glaesserella_parasuis#reduced_virulence	4e-53
CLIBASIA_02940	0.849	Yes	A0A0L7TY46#PHI:11563#BarA#670#Vibrio_parahaemolyticus#reduced_virulence	3e-36
CLIBASIA_02945	0.876	Yes
CLIBASIA_02950	0.859	Yes
CLIBASIA_02955	0.876	Yes	Q2FYQ0#PHI:9450__PHI:9760__PHI:11314#PstB#1280#Staphylococcus_aureus#unaffected_pathogenicity__reduced_virulence	2e-103
CLIBASIA_02960	0.628	Yes	P9WG11#PHI:3635#Rv0930#1773#Mycobacterium_tuberculosis#unaffected_pathogenicity	5e-16
CLIBASIA_02965	0.702	Yes	P9WG11#PHI:3635#Rv0930#1773#Mycobacterium_tuberculosis#unaffected_pathogenicity	3e-14
CLIBASIA_02970	0.24	No	A0A385EXL2#PHI:10561#PstS#470#Acinetobacter_baumannii#reduced_virulence__increased_virulence_(hypervirulence)	9e-93
CLIBASIA_02975	0.208	No
CLIBASIA_02980	0.853	Yes	O52908#PHI:8627#FlhF#197#Campylobacter_jejuni#reduced_virulence	3e-09
CLIBASIA_02985	0.553	Yes
CLIBASIA_02990	0.871	Yes	O52908#PHI:8627#FlhF#197#Campylobacter_jejuni#reduced_virulence	3e-09
CLIBASIA_02995	0.368	No
CLIBASIA_03000	0.323	No
CLIBASIA_03005	0.173	No
CLIBASIA_03010	0.545	Yes
CLIBASIA_03015	0.838	Yes	A0A384JMC8#PHI:9835#Bcpgd#40559#Botrytis_cinerea#reduced_virulence	9e-108
CLIBASIA_03020	0.807	Yes	P39172#PHI:11005#ZnuA#562#Escherichia_coli#reduced_virulence	3e-43
CLIBASIA_03025	0.865	Yes	P0A9X1#PHI:11007#ZnuC#562#Escherichia_coli#reduced_virulence	7e-76
CLIBASIA_03030	0.686	Yes	P39832#PHI:11006#ZnuB#562#Escherichia_coli#reduced_virulence	3e-65
CLIBASIA_03035	0.807	Yes
CLIBASIA_03040	0.849	Yes
CLIBASIA_03045	0.871	Yes
CLIBASIA_03050	0.862	Yes
CLIBASIA_03055	0.882	Yes	Q6D927#PHI:3843#TadA#29471#Pectobacterium_atrosepticum#reduced_virulence	3e-119
CLIBASIA_03060	0.568	Yes	Q6D928#PHI:3842#TadZ#29471#Pectobacterium_atrosepticum#reduced_virulence	3e-14
CLIBASIA_03065	0.854	Yes
CLIBASIA_03070	0.875	Yes	Q6D930#PHI:3840#RcpA#29471#Pectobacterium_atrosepticum#reduced_virulence	8e-51
CLIBASIA_03075	0.86	Yes
CLIBASIA_03080	0.271	No
CLIBASIA_03085	0.882	Yes
CLIBASIA_03090	0.819	Yes
CLIBASIA_03095	0.812	Yes
CLIBASIA_03100	0.778	Yes
CLIBASIA_03105	0.821	Yes	B3GXA0#PHI:8657#Flp1#715#Actinobacillus_pleuropneumoniae#reduced_virulence	1e-05
CLIBASIA_03110	0.815	Yes
CLIBASIA_03115	0.773	Yes
CLIBASIA_03120	0.799	Yes
CLIBASIA_03125	0.764	Yes
CLIBASIA_03130	0.667	Yes
CLIBASIA_03135	0.736	Yes
CLIBASIA_03140	0.399	No
CLIBASIA_03145	0.493	No
CLIBASIA_03150	0.489	No
CLIBASIA_03155	0.775	Yes	P77257#PHI:9992#LsrA#562#Escherichia_coli#reduced_virulence	1e-33
CLIBASIA_03160	0.571	Yes
CLIBASIA_03165	0.495	No
CLIBASIA_03170	0.21	No
CLIBASIA_03175	0.521	Yes	P64394#PHI:2673#HimD#28901#Salmonella_enterica#reduced_virulence	7e-20
CLIBASIA_03180	0.179	No	Q9A0D2#PHI:9799#AdcAII#1314#Streptococcus_pyogenes#reduced_virulence__unaffected_pathogenicity	5e-08
CLIBASIA_03185	0.87	Yes	Q5KN74#PHI:7207#Msh2#5207#Cryptococcus_neoformans#unaffected_pathogenicity	1e-66
CLIBASIA_03190	0.447	No	E8XEV4#PHI:3723#RNase_E#28901#Salmonella_enterica#reduced_virulence	1e-100
CLIBASIA_03195	0.845	Yes	P9WKD1#PHI:7983#PbpA#1773#Mycobacterium_tuberculosis#unaffected_pathogenicity__reduced_virulence	8e-08
CLIBASIA_03200	0.879	Yes	Q8Y4A8#PHI:9821#PrfA_(lmo2543)#1639#Listeria_monocytogenes#reduced_virulence	2e-48
CLIBASIA_03205	0.526	Yes
CLIBASIA_03210	0.305	No
CLIBASIA_03215	0.167	No
CLIBASIA_03220	0.874	Yes
CLIBASIA_03225	0.19	No	A0A0E0UYV6#PHI:11648#GloB#1639#Listeria_monocytogenes#reduced_virulence__unaffected_pathogenicity	3e-26
CLIBASIA_03230	0.882	Yes
CLIBASIA_03235	0.221	No	J4KLZ9#PHI:7155#Pmr1#176275#Beauveria_bassiana#reduced_virulence	6e-38
CLIBASIA_03240	0.207	No
CLIBASIA_03255	0.677	Yes
CLIBASIA_03260	0.792	Yes
CLIBASIA_03275	0.759	Yes
CLIBASIA_03280	0.835	Yes	A0A3Q0L2P3#PHI:8516#Nab1_(VV1_0803)#672#Vibrio_vulnificus#reduced_virulence	5e-06
CLIBASIA_03285	0.8	Yes
CLIBASIA_03290	0.845	Yes
CLIBASIA_03295	0.294	No
CLIBASIA_03300	0.715	Yes	A0A380UNQ5#PHI:10610#LpxA#470#Acinetobacter_baumannii#reduced_virulence	2e-55
CLIBASIA_03305	0.605	Yes	A0A380UNQ5#PHI:10610#LpxA#470#Acinetobacter_baumannii#reduced_virulence	2e-29
CLIBASIA_03310	0.789	Yes	A0A0E2G7L7#PHI:6570#LpxD#106654#Acinetobacter_nosocomialis#reduced_virulence	1e-45
CLIBASIA_03315	0.712	Yes
CLIBASIA_03320	0.174	No	B2SR06#PHI:3895#PXO_01122#347#Xanthomonas_oryzae#reduced_virulence	2e-22
CLIBASIA_03325	0.544	Yes
CLIBASIA_03330	0.193	No
CLIBASIA_03335	0.725	Yes
CLIBASIA_03340	0.762	Yes
CLIBASIA_03345	0.716	Yes
CLIBASIA_03350	0.871	Yes
CLIBASIA_03352	0.852	Yes
CLIBASIA_03355	0.173	No
CLIBASIA_03360	0.639	Yes
CLIBASIA_03362	0.8	Yes
CLIBASIA_03365	0.203	No	Q97NA0#PHI:3477#ArcT#1313#Streptococcus_pneumoniae#reduced_virulence	3e-10
CLIBASIA_03370	0.85	Yes
CLIBASIA_03375	0.87	Yes	Q9HV59#PHI:6080#Pnp#287#Pseudomonas_aeruginosa#reduced_virulence	0
CLIBASIA_03380	0.756	Yes
CLIBASIA_03385	0.196	No
CLIBASIA_03390	0.705	Yes	A0A380PIP1#PHI:11030#BipA#632#Yersinia_pestis#reduced_virulence	3e-09
CLIBASIA_03395	0.841	Yes
CLIBASIA_03400	0.198	No
CLIBASIA_03405	0.528	Yes
CLIBASIA_03410	0.697	Yes
CLIBASIA_03415	0.194	No	Q8Y6T0#PHI:5368#Lmo1603#1639#Listeria_monocytogenes#reduced_virulence	8e-19
CLIBASIA_03420	0.816	Yes
CLIBASIA_03425	0.827	Yes
CLIBASIA_03430	0.2	No
CLIBASIA_03435	0.172	No
CLIBASIA_03440	0.665	Yes
CLIBASIA_03445	0.643	Yes
CLIBASIA_03450	0.351	No	Q8YAQ5#PHI:7805#EssC_(lmo0061)#1639#Listeria_monocytogenes#increased_virulence_(hypervirulence)	6e-14
CLIBASIA_03455	0.876	Yes
CLIBASIA_03460	0.213	No
CLIBASIA_03465	0.2	No
CLIBASIA_03470	0.881	Yes
CLIBASIA_03475	0.334	No
CLIBASIA_03480	0.202	No
CLIBASIA_03485	0.28	No	O05853#PHI:3628#Rv3213c#1773#Mycobacterium_tuberculosis#increased_virulence_(hypervirulence)	1e-51
CLIBASIA_03490	0.195	No
CLIBASIA_03495	0.392	No	A4VYE0#PHI:11091#GidA#1307#Streptococcus_suis#reduced_virulence	4e-169
CLIBASIA_03500	0.648	Yes	A4VWD1#PHI:9270__PHI:11090#MnmE#1307#Streptococcus_suis#reduced_virulence	1e-67
CLIBASIA_03505	0.864	Yes	Q180Y6#PHI:10717#Rho#1496#Clostridioides_difficile#reduced_virulence	4e-150
CLIBASIA_03510	0.297	No
CLIBASIA_03515	0.612	Yes
CLIBASIA_03520	0.176	No
CLIBASIA_03525	0.871	Yes
CLIBASIA_03530	0.57	Yes
CLIBASIA_03535	0.814	Yes
CLIBASIA_03540	0.87	Yes
CLIBASIA_03545	0.187	No
CLIBASIA_03550	0.29	No
CLIBASIA_03555	0.571	Yes	Q5HF73#PHI:10348#AccD#1280#Staphylococcus_aureus#reduced_virulence	2e-73
CLIBASIA_03560	0.286	No	Q3IZC2#PHI:10842#RSp0930#305#Ralstonia_solanacearum#effector_(plant_avirulence_determinant)	3e-76
CLIBASIA_03565	0.784	Yes	V5VGM8#PHI:9285#TrxA#470#Acinetobacter_baumannii#reduced_virulence	1e-26
CLIBASIA_03580	0.584	Yes
CLIBASIA_03585	0.186	No
CLIBASIA_03590	0.858	Yes	A0A0L7TY46#PHI:11563#BarA#670#Vibrio_parahaemolyticus#reduced_virulence	3e-25
CLIBASIA_03592	0.81	Yes
CLIBASIA_03595	0.863	Yes	F5HAA8#PHI:424#PCK1#5207#Cryptococcus_neoformans#reduced_virulence	4e-125
CLIBASIA_03600	0.749	Yes
CLIBASIA_03605	0.853	Yes
CLIBASIA_03610	0.862	Yes	Q8PBY5#PHI:9833#ClpX#339#Xanthomonas_campestris#reduced_virulence	3e-21
CLIBASIA_03615	0.77	Yes
CLIBASIA_03620	0.751	Yes
CLIBASIA_03625	0.85	Yes
CLIBASIA_03630	0.752	Yes
CLIBASIA_03645	0.68	Yes
CLIBASIA_03650	0.848	Yes	Q5NGP7#PHI:7067#KdsD#263#Francisella_tularensis#reduced_virulence	6e-75
CLIBASIA_03655	0.26	No
CLIBASIA_03660	0.731	Yes
CLIBASIA_03665	0.868	Yes
CLIBASIA_03670	0.787	Yes
CLIBASIA_03675	0.716	Yes
CLIBASIA_03680	0.783	Yes	L0AQG4#PHI:9079#Pcs#317#Pseudomonas_syringae#reduced_virulence	5e-34
CLIBASIA_03685	0.183	No	P25535#PHI:7028#UbiI#562#Escherichia_coli#reduced_virulence	7e-33
CLIBASIA_03690	0.479	No	Q83EQ0#PHI:9509#CBU_0265#777#Coxiella_burnetii#unaffected_pathogenicity	2e-65
CLIBASIA_03695	0.882	Yes
CLIBASIA_03700	0.866	Yes
CLIBASIA_03705	0.157	No
CLIBASIA_03710	0.221	No
CLIBASIA_03715	0.426	No
CLIBASIA_03720	0.859	Yes	P42375#PHI:3085#GroEL#837#Porphyromonas_gingivalis#increased_virulence_(hypervirulence)	0
CLIBASIA_03725	0.745	Yes
CLIBASIA_03730	0.821	Yes
CLIBASIA_03735	0.177	No
CLIBASIA_03740	0.237	No	A0A0F6B5R1#PHI:10068#STM14_RS15275#28901#Salmonella_enterica#unaffected_pathogenicity	9e-29
CLIBASIA_03745	0.175	No	A0A0F6B5R3#PHI:10070#STM14_RS15285#28901#Salmonella_enterica#unaffected_pathogenicity	4e-07
CLIBASIA_03750	0.271	No	I1RA52#PHI:445#NOS1#5518#Fusarium_graminearum#reduced_virulence	0
CLIBASIA_03755	0.852	Yes
CLIBASIA_03760	0.843	Yes
CLIBASIA_03765	0.212	No
CLIBASIA_03770	0.868	Yes	Q9I0J6#PHI:11247#NuoG#287#Pseudomonas_aeruginosa#unaffected_pathogenicity	5e-52
CLIBASIA_03775	0.217	No	A0A0F6B5R4#PHI:10071#STM14_RS15290#28901#Salmonella_enterica#unaffected_pathogenicity	6e-10
CLIBASIA_03780	0.173	No	Q9I0J4#PHI:8937#NuoI_(PA2644)#287#Pseudomonas_aeruginosa#unaffected_pathogenicity__reduced_virulence	9e-27
CLIBASIA_03785	0.173	No	Q9I0J3#PHI:8938#NuoJ_(PA2645)#287#Pseudomonas_aeruginosa#unaffected_pathogenicity__reduced_virulence	3e-11
CLIBASIA_03790	0.79	Yes
CLIBASIA_03795	0.77	Yes
CLIBASIA_03800	0.332	No	A6QFG2#PHI:7818#MnhA1#1280#Staphylococcus_aureus#reduced_virulence	1e-55
CLIBASIA_03805	0.368	No	A6QET3#PHI:7819#MnhA2#1280#Staphylococcus_aureus#unaffected_pathogenicity	4e-26
CLIBASIA_03810	0.402	No	A6QET3#PHI:7819#MnhA2#1280#Staphylococcus_aureus#unaffected_pathogenicity	4e-13
CLIBASIA_03815	0.304	No
CLIBASIA_03820	0.213	No	B1MD40#PHI:11365#Mab_3083c#36809#Mycobacteroides_abscessus#unaffected_pathogenicity	1e-83
CLIBASIA_03825	0.86	Yes
CLIBASIA_03840	0.772	Yes	Q8ZQE4#PHI:3928#MacB#28901#Salmonella_enterica#reduced_virulence	6e-41
CLIBASIA_03845	0.175	No	B2HHI1#PHI:3364#MMAR_1663#1781#Mycobacterium_marinum#reduced_virulence	2e-07
CLIBASIA_03850	0.86	Yes	W7MS01#PHI:3389#FVEG_12521#117187#Fusarium_verticillioides#unaffected_pathogenicity	3e-18
CLIBASIA_03855	0.859	Yes	Q8Y4A8#PHI:9821#PrfA_(lmo2543)#1639#Listeria_monocytogenes#reduced_virulence	6e-110
CLIBASIA_03860	0.202	No	Q4UWE2#PHI:3966#XC_1565#339#Xanthomonas_campestris#reduced_virulence	2e-18
CLIBASIA_03865	0.868	Yes
CLIBASIA_03870	0.871	Yes	C6DC70#PHI:10595#ClpB#554#Pectobacterium_carotovorum#unaffected_pathogenicity	0
CLIBASIA_03875	0.787	Yes
CLIBASIA_03880	0.232	No	A0A0H3P9Y0#PHI:7198#Cjj81176_1228#197#Campylobacter_jejuni#loss_of_pathogenicity	5e-33
CLIBASIA_03885	0.77	Yes
CLIBASIA_03890	0.783	Yes
CLIBASIA_03895	0.225	No
CLIBASIA_03900	0.798	Yes
CLIBASIA_03905	0.788	Yes
CLIBASIA_03910	0.594	Yes
CLIBASIA_03915	0.812	Yes
CLIBASIA_03920	0.815	Yes
CLIBASIA_03925	0.786	Yes
CLIBASIA_03930	0.859	Yes	D5AF41#PHI:4071#IMPDH#1307#Streptococcus_suis#reduced_virulence	0
CLIBASIA_03935	0.833	Yes
CLIBASIA_03940	0.296	No
CLIBASIA_03945	0.69	Yes	A0A0J9WX31#PHI:8983#PXO_RS12150/_PXO_RS13080#347#Xanthomonas_oryzae#unaffected_pathogenicity	3e-06
CLIBASIA_03950	0.855	Yes	B8K2M4#PHI:10957#PhoP#40324#Stenotrophomonas_maltophilia#reduced_virulence	4e-49
CLIBASIA_03955	0.873	Yes
CLIBASIA_03960	0.847	Yes
CLIBASIA_03965	0.174	No
CLIBASIA_03970	0.858	Yes
CLIBASIA_03975	0.201	No
CLIBASIA_03990	0.449	No	D2TI55#PHI:9334#Map#67825#Citrobacter_rodentium#effector_(plant_avirulence_determinant)	4e-83
CLIBASIA_03995	0.853	Yes
CLIBASIA_04000	0.713	Yes
CLIBASIA_04005	0.711	Yes
CLIBASIA_04010	0.882	Yes	A0A0K0GKL7#PHI:8979#PXO_RS10565#347#Xanthomonas_oryzae#unaffected_pathogenicity	3e-32
CLIBASIA_04015	0.206	No
CLIBASIA_04020	0.837	Yes	Q8XY07#PHI:10682#MurI#305#Ralstonia_solanacearum#reduced_virulence	2e-19
CLIBASIA_04025	0.88	Yes
CLIBASIA_04030	0.874	Yes
CLIBASIA_04035	0.833	Yes
CLIBASIA_04040	0.882	Yes
CLIBASIA_04045	0.84	Yes
CLIBASIA_04050	0.818	Yes	P08179#PHI:8652#PurN#562#Escherichia_coli#unaffected_pathogenicity__reduced_virulence	1e-13
CLIBASIA_04055	0.867	Yes
CLIBASIA_04060	0.703	Yes	P0A355#PHI:7637#CspA#1639#Listeria_monocytogenes#reduced_virulence	2e-13
CLIBASIA_04065	0.874	Yes
CLIBASIA_04070	0.277	No
CLIBASIA_04075	0.823	Yes	A0A0K0GGF6#PHI:9014#PXO_RS02690#347#Xanthomonas_oryzae#unaffected_pathogenicity	1e-46
CLIBASIA_04080	0.856	Yes	A0A086VCI7#PHI:6912#YbtP#562#Escherichia_coli#reduced_virulence	1e-59
CLIBASIA_04085	0.277	No	Q8PGL8#PHI:2481#RfbC#346#Xanthomonas_citri#reduced_virulence	1e-96
CLIBASIA_04090	0.867	Yes
CLIBASIA_04095	0.669	Yes	F8U971#PHI:6157#Bcdh#40559#Botrytis_cinerea#unaffected_pathogenicity	6e-59
CLIBASIA_04100	0.86	Yes	Q9A0G6#PHI:5069#GacA#1314#Streptococcus_pyogenes#lethal	2e-40
CLIBASIA_04105	0.811	Yes	Q9HU22#PHI:7634#RmlA#287#Pseudomonas_aeruginosa#reduced_virulence__loss_of_pathogenicity	8e-116
CLIBASIA_04110	0.577	Yes	A0A0K0GQ25#PHI:7967#PXO_03177#347#Xanthomonas_oryzae#reduced_virulence	1e-23
CLIBASIA_04115	0.182	No
CLIBASIA_04120	0.869	Yes
CLIBASIA_04125	0.782	Yes
CLIBASIA_04130	0.855	Yes	Q9HVW7#PHI:7630#MurA#287#Pseudomonas_aeruginosa#reduced_virulence__unaffected_pathogenicity	1e-147
CLIBASIA_04135	0.794	Yes
CLIBASIA_04140	0.874	Yes
CLIBASIA_04145	0.881	Yes	Q24LT6#PHI:6388#AdeK#470#Acinetobacter_baumannii#unaffected_pathogenicity	1e-33
CLIBASIA_04150	0.764	Yes
CLIBASIA_04155	0.882	Yes
CLIBASIA_04160	0.245	No
CLIBASIA_04165	0.79	Yes
CLIBASIA_04170	0.711	Yes	Q9HVT6#PHI:5448#PA4485#287#Pseudomonas_aeruginosa#unaffected_pathogenicity	3e-21
CLIBASIA_04175	0.838	Yes
CLIBASIA_04180	0.873	Yes
CLIBASIA_04185	0.405	No
CLIBASIA_04190	0.184	No
CLIBASIA_04195	0.207	No	Q56056#PHI:3724#RNase_III#28901#Salmonella_enterica#reduced_virulence	4e-36
CLIBASIA_04200	0.174	No	P0C0B9#PHI:11438#BglB#1314#Streptococcus_pyogenes#increased_virulence_(hypervirulence)__reduced_virulence	2e-48
CLIBASIA_04205	0.224	No	B2I2B5#PHI:8042#LpxA#470#Acinetobacter_baumannii#reduced_virulence	3e-102
CLIBASIA_04210	0.825	Yes	D4I4L2#PHI:9308#GlmS#552#Erwinia_amylovora#reduced_virulence	7e-166
CLIBASIA_04215	0.175	No
CLIBASIA_04220	0.218	No	Q81J94#PHI:6483#Mfd#1396#Bacillus_cereus#loss_of_pathogenicity	6e-59
CLIBASIA_04225	0.503	Yes
CLIBASIA_04230	0.779	Yes	Q81J94#PHI:6483#Mfd#1396#Bacillus_cereus#loss_of_pathogenicity	0
CLIBASIA_04235	0.729	Yes
CLIBASIA_04240	0.647	Yes
CLIBASIA_04245	0.172	No
CLIBASIA_04250	0.813	Yes
CLIBASIA_04255	0.272	No
CLIBASIA_04260	0.785	Yes	Q87AV4#PHI:7287#MopB#2371#Xylella_fastidiosa#reduced_virulence	8e-16
CLIBASIA_04265	0.592	Yes
CLIBASIA_04270	0.808	Yes
CLIBASIA_04275	0.437	No
CLIBASIA_04280	0.743	Yes	Q5A5E0#PHI:10653#Dfr1#5476#Candida_albicans#reduced_virulence	1e-19
CLIBASIA_04285	0.223	No
CLIBASIA_04290	0.19	No
CLIBASIA_04295	0.646	Yes	Q2YS30#PHI:11161#SerB_(BAB1_1410)#29459#Brucella_melitensis#reduced_virulence	2e-106
CLIBASIA_04310	0.57	Yes	P0AB06#PHI:11001#YcbK#562#Escherichia_coli#unaffected_pathogenicity	1e-30
CLIBASIA_04315	0.745	Yes
CLIBASIA_04320	0.692	Yes
CLIBASIA_04325	0.866	Yes
CLIBASIA_04330	0.818	Yes
CLIBASIA_04335	0.853	Yes
CLIBASIA_04340	0.173	No	A0ST42#PHI:737__PHI:2329#CTB4#29003#Cercospora_nicotianae#reduced_virulence	8e-12
CLIBASIA_04345	0.732	Yes	J9VHR2#PHI:8615#Grx4_(CNAG_02950)#5207#Cryptococcus_neoformans#loss_of_pathogenicity	5e-27
CLIBASIA_04350	0.199	No
CLIBASIA_04355	0.862	Yes	D4HYF4#PHI:9320#PurL#552#Erwinia_amylovora#reduced_virulence	3e-27
CLIBASIA_04360	0.676	Yes	E0SB00#PHI:8580#PurL_(Dda3937_03379)#204038#Dickeya_dadantii#reduced_virulence	3e-15
CLIBASIA_04365	0.594	Yes
CLIBASIA_04370	0.854	Yes
CLIBASIA_04375	0.836	Yes	Q2FFI7#PHI:7345#PurB#1280#Staphylococcus_aureus#reduced_virulence	3e-150
CLIBASIA_04380	0.796	Yes
CLIBASIA_04385	0.411	No
CLIBASIA_04390	0.617	Yes
CLIBASIA_04395	0.709	Yes	P06618#PHI:4171#IaaH-1#29438#Pseudomonas_savastanoi#reduced_virulence	2e-25
CLIBASIA_04400	0.855	Yes
CLIBASIA_04405	0.882	Yes
CLIBASIA_04410	0.882	Yes
CLIBASIA_04415	0.169	No
CLIBASIA_04420	0.811	Yes
CLIBASIA_04425	0.871	Yes
CLIBASIA_04430	0.765	Yes
CLIBASIA_04435	0.798	Yes
CLIBASIA_04440	0.408	No
CLIBASIA_04445	0.869	Yes
CLIBASIA_04450	0.232	No
CLIBASIA_04455	0.855	Yes
CLIBASIA_04460	0.875	Yes	Q8DYL6#PHI:11576#UvrB#1311#Streptococcus_agalactiae#unaffected_pathogenicity	0
CLIBASIA_04465	0.721	Yes
CLIBASIA_04470	0.684	Yes
CLIBASIA_04475	0.668	Yes
CLIBASIA_04480	0.705	Yes
CLIBASIA_04485	0.881	Yes
CLIBASIA_04490	0.843	Yes
CLIBASIA_04495	0.741	Yes	A0A0F6B0W8#PHI:10103#STM14_RS07725_(ynhA/sufE)#28901#Salmonella_enterica#reduced_virulence	7e-12
CLIBASIA_04500	0.293	No	P32964#PHI:143#CHT#1682391#Microdochium_sorghi#unaffected_pathogenicity	7e-07
CLIBASIA_04505	0.171	No
CLIBASIA_04510	0.84	Yes
CLIBASIA_04515	0.823	Yes
CLIBASIA_04520	0.882	Yes
CLIBASIA_04525	0.324	No
CLIBASIA_04530	0.858	Yes
CLIBASIA_04535	0.829	Yes
CLIBASIA_04540	0.874	Yes
CLIBASIA_04550	0.846	Yes
CLIBASIA_04555	0.878	Yes
CLIBASIA_04560	0.866	Yes
CLIBASIA_04565	0.642	Yes	O74686#PHI:159#URA5#5037#Histoplasma_capsulatum#loss_of_pathogenicity	1e-08
CLIBASIA_04570	0.854	Yes	D4I0W8#PHI:9307#PyrC#552#Erwinia_amylovora#reduced_virulence	1e-110
CLIBASIA_04575	0.86	Yes
CLIBASIA_04580	0.773	Yes
CLIBASIA_04585	0.849	Yes
CLIBASIA_04590	0.844	Yes
CLIBASIA_04595	0.178	No	Q4WP25#PHI:2542#ERG12#746128#Aspergillus_fumigatus#lethal	2e-16
CLIBASIA_04600	0.764	Yes
CLIBASIA_04605	0.199	No
CLIBASIA_04610	0.174	No	Q6FM61#PHI:2570#CYB2#5478#Candida_glabrata#reduced_virulence	3e-06
CLIBASIA_04615	0.701	Yes	I1RXX1#PHI:1006#HMR1#5518#Fusarium_graminearum#reduced_virulence	6e-47
CLIBASIA_04620	0.361	No
CLIBASIA_04625	0.82	Yes
CLIBASIA_04630	0.22	No	A0A0F6AZ29#PHI:7216#STM14_1007#28901#Salmonella_enterica#reduced_virulence	5e-165
CLIBASIA_04635	0.553	Yes
CLIBASIA_04640	0.848	Yes	W9BJ64#PHI:7572#YfiB#573#Klebsiella_pneumoniae#unaffected_pathogenicity	2e-50
CLIBASIA_04645	0.372	No
CLIBASIA_04650	0.302	No
CLIBASIA_04655	0.874	Yes
CLIBASIA_04660	0.797	Yes
CLIBASIA_04665	0.665	Yes
CLIBASIA_04670	0.757	Yes
CLIBASIA_04675	0.304	No
CLIBASIA_04680	0.62	Yes
CLIBASIA_04685	0.285	No
CLIBASIA_04690	0.806	Yes
CLIBASIA_04695	0.301	No
CLIBASIA_04700	0.532	Yes
CLIBASIA_04705	0.757	Yes	A4VY17#PHI:9338#Pdh#1307#Streptococcus_suis#reduced_virulence	7e-42
CLIBASIA_04710	0.239	No
CLIBASIA_04715	0.444	No
CLIBASIA_04720	0.173	No	P0AC44#PHI:7963#SdhD#562#Escherichia_coli#reduced_virulence	2e-06
CLIBASIA_04725	0.213	No	F9WWR1#PHI:4966#Sdi1#1047171#Zymoseptoria_tritici#unaffected_pathogenicity	0
CLIBASIA_04730	0.26	No	O42772#PHI:822#Ip#1047171#Zymoseptoria_tritici#chemistry_target:_resistance_to_chemical	2e-101
CLIBASIA_04735	0.847	Yes
CLIBASIA_04740	0.807	Yes
CLIBASIA_04745	0.195	No
CLIBASIA_04750	0.665	Yes	Q838C9#PHI:4140#Ldh-2#1351#Enterococcus_faecalis#unaffected_pathogenicity__reduced_virulence	7e-49
CLIBASIA_04755	0.852	Yes
CLIBASIA_04760	0.71	Yes
CLIBASIA_04765	0.845	Yes	G2XIN6#PHI:9378#VdOGDH_(VDAG_10018)#27337#Verticillium_dahliae#reduced_virulence	0
CLIBASIA_04770	0.269	No	Q2FH26#PHI:7353#OdhB#1280#Staphylococcus_aureus#unaffected_pathogenicity	1e-101
CLIBASIA_04775	0.777	Yes	Q5ZVD8#PHI:6520#LpdA#446#Legionella_pneumophila#effector_(plant_avirulence_determinant)	2e-99
CLIBASIA_04780	0.794	Yes
CLIBASIA_04785	0.793	Yes	C4YR40#PHI:4904#Glr1#5476#Candida_albicans#reduced_virulence	8e-84
CLIBASIA_04790	0.161	No
CLIBASIA_04795	0.4	No
CLIBASIA_04800	0.343	No
CLIBASIA_04805	0.834	Yes	A0A0F6B0W4#PHI:6893__PHI:10099#SufB__STM14_RS07705_(sufB)#28901#Salmonella_enterica#unaffected_pathogenicity__reduced_virulence	0
CLIBASIA_04810	0.762	Yes	A0A0M2J080#PHI:6894#SufC#28901#Salmonella_enterica#unaffected_pathogenicity	3e-94
CLIBASIA_04815	0.816	Yes	A0A0F6B0W6#PHI:10101#STM14_RS07715_(sufD)#28901#Salmonella_enterica#reduced_virulence	2e-30
CLIBASIA_04820	0.219	No	A0A0F6B0W7#PHI:10102#STM14_RS07720_(sufS)#28901#Salmonella_enterica#reduced_virulence	2e-132
CLIBASIA_04825	0.777	Yes	B4E599#PHI:3171#PaaD#95486#Burkholderia_cenocepacia#reduced_virulence	5e-06
CLIBASIA_04830	0.762	Yes
CLIBASIA_04835	0.674	Yes
CLIBASIA_04840	0.875	Yes	A0A5A4WCC8#PHI:9933#LysX#1764#Mycobacterium_avium#increased_virulence_(hypervirulence)	9e-32
CLIBASIA_04845	0.857	Yes	P64036#PHI:6420#EF-P#28901#Salmonella_enterica#increased_virulence_(hypervirulence)	3e-32
CLIBASIA_04850	0.198	No
CLIBASIA_04855	0.701	Yes
CLIBASIA_04860	0.202	No
CLIBASIA_04865	0.3	No
CLIBASIA_04870	0.846	Yes
CLIBASIA_04875	0.793	Yes
CLIBASIA_04880	0.851	Yes
CLIBASIA_04885	0.853	Yes
CLIBASIA_04890	0.174	No
CLIBASIA_04895	0.875	Yes
CLIBASIA_04900	0.796	Yes
CLIBASIA_04905	0.206	No	B4ENE7#PHI:8836#Bcas0398#95486#Burkholderia_cenocepacia#increased_virulence_(hypervirulence)	9e-24
CLIBASIA_04910	0.834	Yes
CLIBASIA_04915	0.882	Yes
CLIBASIA_04920	0.876	Yes
CLIBASIA_04925	0.833	Yes
CLIBASIA_04930	0.854	Yes
CLIBASIA_04935	0.318	No
CLIBASIA_04940	0.395	No
CLIBASIA_04945	0.824	Yes
CLIBASIA_04950	0.871	Yes	A0A0F6B941#PHI:9436#AtpB#28901#Salmonella_enterica#reduced_virulence	2e-10
CLIBASIA_04955	0.839	Yes
CLIBASIA_04960	0.78	Yes
CLIBASIA_04965	0.211	No	A0A0F6B0W7#PHI:10102#STM14_RS07720_(sufS)#28901#Salmonella_enterica#reduced_virulence	6e-15
CLIBASIA_04970	0.845	Yes
CLIBASIA_04975	0.281	No
CLIBASIA_04980	0.786	Yes
CLIBASIA_04985	0.456	No
CLIBASIA_04990	0.149	No
CLIBASIA_04995	0.407	No	C0RE70#PHI:11554#A1479#29459#Brucella_melitensis#reduced_virulence	4e-110
CLIBASIA_05000	0.185	No	P9WN99#PHI:7982#RodA#1773#Mycobacterium_tuberculosis#unaffected_pathogenicity__reduced_virulence	1e-24
CLIBASIA_05005	0.19	No	Q9HVZ9#PHI:7631#MurD#287#Pseudomonas_aeruginosa#reduced_virulence__loss_of_pathogenicity	4e-39
CLIBASIA_05010	0.663	Yes
CLIBASIA_05015	0.175	No	Q9HVZ7#PHI:7632#MurF#287#Pseudomonas_aeruginosa#unaffected_pathogenicity__loss_of_pathogenicity	1e-58
CLIBASIA_05020	0.254	No	Q9HVZ7#PHI:7632#MurF#287#Pseudomonas_aeruginosa#unaffected_pathogenicity__loss_of_pathogenicity	3e-07
CLIBASIA_05025	0.609	Yes
CLIBASIA_05030	0.608	Yes
CLIBASIA_05035	0.186	No	P60392#PHI:4961#RsmH#1280#Staphylococcus_aureus#reduced_virulence	5e-50
CLIBASIA_05040	0.384	No
CLIBASIA_05045	0.803	Yes
CLIBASIA_05050	0.856	Yes
CLIBASIA_05055	0.836	Yes
CLIBASIA_05060	0.791	Yes
CLIBASIA_05065	0.274	No
CLIBASIA_05070	0.396	No	Q9K035#PHI:8621#Cbp_(NMB0787)#487#Neisseria_meningitidis#reduced_virulence__unaffected_pathogenicity	7e-40
CLIBASIA_05075	0.639	Yes	Q9K034#PHI:8622#Ctp_(NMB0788)#487#Neisseria_meningitidis#unaffected_pathogenicity	4e-58
CLIBASIA_05080	0.827	Yes	Q0ZB06#PHI:4241#LpsA#727#Haemophilus_influenzae#reduced_virulence	5e-07
CLIBASIA_05085	0.175	No
CLIBASIA_05090	0.776	Yes
CLIBASIA_05095	0.266	No
CLIBASIA_05100	0.881	Yes	V6RRH2#PHI:1594#GzOB034#5518#Fusarium_graminearum#unaffected_pathogenicity	2e-105
CLIBASIA_05105	0.833	Yes
CLIBASIA_05110	0.175	No
CLIBASIA_05115	0.727	Yes
CLIBASIA_05120	0.608	Yes
CLIBASIA_05125	0.845	Yes	P0A9X1#PHI:11007#ZnuC#562#Escherichia_coli#reduced_virulence	2e-15
CLIBASIA_05130	0.813	Yes
CLIBASIA_05135	0.819	Yes
CLIBASIA_05140	0.84	Yes
CLIBASIA_05145	0.827	Yes
CLIBASIA_05150	0.868	Yes
CLIBASIA_05155	0.882	Yes
CLIBASIA_05160	0.883	Yes
CLIBASIA_05165	0.881	Yes
CLIBASIA_05170	0.847	Yes
CLIBASIA_05175	0.782	Yes
CLIBASIA_05180	0.745	Yes
CLIBASIA_05185	0.866	Yes
CLIBASIA_05190	0.882	Yes
CLIBASIA_05195	0.851	Yes
CLIBASIA_05200	0.829	Yes
CLIBASIA_05205	0.778	Yes
CLIBASIA_05210	0.816	Yes
CLIBASIA_05225	0.588	Yes
CLIBASIA_05230	0.823	Yes
CLIBASIA_05235	0.825	Yes
CLIBASIA_05240	0.83	Yes
CLIBASIA_05245	0.79	Yes
CLIBASIA_05265	0.882	Yes
CLIBASIA_05270	0.208	No
CLIBASIA_05275	0.834	Yes
CLIBASIA_05280	0.58	Yes
CLIBASIA_05285	0.73	Yes
CLIBASIA_05290	0.758	Yes
CLIBASIA_05295	0.78	Yes
CLIBASIA_05300	0.748	Yes
CLIBASIA_05305	0.824	Yes
CLIBASIA_05310	0.798	Yes
CLIBASIA_05315	0.878	Yes
CLIBASIA_05320	0.832	Yes
CLIBASIA_05325	0.781	Yes
CLIBASIA_05330	0.866	Yes
CLIBASIA_05335	0.21	No
CLIBASIA_05340	0.699	Yes
CLIBASIA_05345	0.186	No
CLIBASIA_05350	0.82	Yes
CLIBASIA_05355	0.796	Yes
CLIBASIA_05360	0.877	Yes	A0A0H2ZGB1#PHI:7298#PhzG1#287#Pseudomonas_aeruginosa#reduced_virulence	3e-30
CLIBASIA_05365	0.199	No	Q2FZQ3#PHI:7915#FabI#1280#Staphylococcus_aureus#reduced_virulence__unaffected_pathogenicity	2e-66
CLIBASIA_05370	0.173	No
CLIBASIA_05375	0.773	Yes
CLIBASIA_05380	0.363	No
CLIBASIA_05385	0.872	Yes	J4KQS2#PHI:8671#Phr1_(EJP69699)#176275#Beauveria_bassiana#unaffected_pathogenicity	2e-97
CLIBASIA_05390	0.211	No
CLIBASIA_05395	0.748	Yes	A3M2U3#PHI:7809#AdeN#470#Acinetobacter_baumannii#increased_virulence_(hypervirulence)	3e-142
CLIBASIA_05400	0.868	Yes
CLIBASIA_05405	0.789	Yes
CLIBASIA_05410	0.853	Yes	B2I1I9#PHI:10612#LpxC#470#Acinetobacter_baumannii#reduced_virulence	8e-54
CLIBASIA_05415	0.866	Yes
CLIBASIA_05420	0.852	Yes
CLIBASIA_05425	0.174	No
CLIBASIA_05430	0.653	Yes
CLIBASIA_05435	0.875	Yes
CLIBASIA_05440	0.864	Yes
CLIBASIA_05445	0.447	No
CLIBASIA_05450	0.859	Yes
CLIBASIA_05455	0.746	Yes
CLIBASIA_05460	0.798	Yes
CLIBASIA_05465	0.768	Yes
CLIBASIA_05470	0.578	Yes
CLIBASIA_05475	0.639	Yes
CLIBASIA_05480	0.852	Yes
CLIBASIA_05485	0.786	Yes
CLIBASIA_05490	0.809	Yes
CLIBASIA_05495	0.876	Yes
CLIBASIA_05500	0.478	No
CLIBASIA_05505	0.185	No
CLIBASIA_05510	0.249	No	G2WUQ0#PHI:10379#Isw2#27337#Verticillium_dahliae#reduced_virulence	8e-06
CLIBASIA_05515	0.87	Yes	A3M2U3#PHI:7809#AdeN#470#Acinetobacter_baumannii#increased_virulence_(hypervirulence)	4e-08
CLIBASIA_05520	0.208	No
CLIBASIA_05525	0.858	Yes
CLIBASIA_05530	0.728	Yes
CLIBASIA_05531	0.863	Yes
CLIBASIA_05538	0.877	Yes
CLIBASIA_05545	0.769	Yes
CLIBASIA_05550	0.866	Yes
CLIBASIA_05555	0.844	Yes
CLIBASIA_05560	0.832	Yes
CLIBASIA_05565	0.882	Yes
CLIBASIA_05570	0.847	Yes
CLIBASIA_05575	0.876	Yes
CLIBASIA_05580	0.873	Yes
CLIBASIA_05585	0.773	Yes
CLIBASIA_05590	0.882	Yes
CLIBASIA_05595	0.845	Yes
CLIBASIA_05600	0.802	Yes
CLIBASIA_05605	0.802	Yes
CLIBASIA_05610	0.827	Yes
CLIBASIA_05615	0.791	Yes
CLIBASIA_05620	0.843	Yes
CLIBASIA_05625	0.193	No
CLIBASIA_05630	0.865	Yes
CLIBASIA_05635	0.855	Yes
CLIBASIA_05640	0.882	Yes
CLIBASIA_05645	0.278	No
CLIBASIA_05650	0.188	No
CLIBASIA_05655	0.861	Yes
CLIBASIA_05660	0.661	Yes
CLIBASIA_05665	0.776	Yes
CLIBASIA_05670	0.837	Yes
CLIBASIA_05675	0.865	Yes

## Sheet: Sheet2
CLIBASIA_00110	0	CLIBASIA_00110	A3M1G3#PHI:7860#RpoB#470#Acinetobacter_baumannii#reduced_virulence	A3M1G3#PHI:7860#RpoB#470#Acinetobacter_baumannii#reduced_virulence	0	0	A3M1G3#PHI:7860#RpoB#470#Acinetobacter_baumannii#reduced_virulence	A3M1G3#PHI:7860#RpoB#470#Acinetobacter_baumannii#reduced_virulence	12	1362	10	1357	RVRKFFGKNPEIIDIPDLIEVQKASYDHFLMMNIAPDERPNEGLQAAFKSVFPITAFSGAAMLEFVSYEFDPPKFDVDDCLWRDLTYAVPLKITLRLIVFDVDEFTGAKSIKDIKEQSIYMGDLPLMTKDGTFVIKGIQRIVVSQLHRSPGIHFDHDKGRASLSGKLLYACRIIPDQGLWMDIEFDSKDIIHVRIDRRRKVPVTSFLMALGMDSEEILSTFYPKI-VYSQRGDFWCFPLSAADLMVGAKVSSSLVDIDTGEQVIESGKKLTSGLLKSLKEKGVKFLGITSDCLCGLYVAEDIVNGETGEIYIEAGDVIDEKSLEEIFHSEIRDIPILYVDSVNNNAYIRNTLVTDKNKDRKDALLDIYRVMRPGDVSTFSVAESMFNFLFFDSDKYDLS…	RIRKNFGKLPQVMDAPYLLSIQVDSYRTFLQDGKSPKNREDIGLQAAFRSVFPIESYSGNAALEFVEYSLGKPEFDVRECILRGSTYAAPMRVKIRLIIKDRE----TKSIKDVREQEVYMGEIPLMTENGTFVINGTERVIVSQLHRSPGVFFDHDKGKTHSSGKVLYSARIIPYRGSWLDFEFDAKDLVYVRIDRRRKLLATVVLRALGYNNEQILNLFYEKVPVYLDMGSYQIDLVP--ERLRGEMAQFDITD-NEGKVIVEQGKRINARHVRQMEAAGLTKLSVPDEYLYERITAEDITLRD-GEV-IAANTLLSHEVMVKLAEGGVKQFNILFTNDIDRGSFVADTLRADLTRDREEALVEIYKVMRPGEPPTKEAAENLFNNLFFSSERYDLS…	0	1466	3794	1361	52.83	719	619	986	11	23	72.45	44562	1	1VI2FN3NL1EQIVIM1IA1DY1ILESVI1KVAD2DRHT2MQMDNGIKAS1DKEN1PENDEI6KR5TEASFY2AN1MA4SE1ESFLDGPK1KE3DRDE1LIWL1DGLS3VA1LMKRIVTKLI3VIFK1VRDEE-F-T-G-AT5IVKR2SEIV3DELI4KEDN5KN1ITQE1IVVI9IVHF6RKATSHLS3LV2ASCA4DYQR1LS1ML1IF3SA2ILIVHY8VLPLVA1SVFV1MR3MYDNSN1EQ2SNTL2PE1IV-P2SLQDRM1DSFYWQCIFDPLLVSPA-A-DELRMLVR1AEKMVASQSFSDLIVT1I-DNTE1EKQVVIIV1SQ2KRLITNSAGRLHLVKRSQLMKEEAKA1VLKTFK1GSIVTPSDDECY1CYGELRYIVT4VTNLGREDT…	N/A	N/A	N/A	N/A	N/A	N/A	N/A	N/A	97	97
CLIBASIA_00230	0	CLIBASIA_00230	E0SMW9#PHI:8569#ClpA_(Dda3937_02363)#204038#Dickeya_dadantii#reduced_virulence	E0SMW9#PHI:8569#ClpA_(Dda3937_02363)#204038#Dickeya_dadantii#reduced_virulence	0	0	E0SMW9#PHI:8569#ClpA_(Dda3937_02363)#204038#Dickeya_dadantii#reduced_virulence	E0SMW9#PHI:8569#ClpA_(Dda3937_02363)#204038#Dickeya_dadantii#reduced_virulence	3	761	1	738	FFSENLEKVLHQALVLANERNHEYATLEHLLLALIDDSDAAIVMLSCNVDLKVLKNNLLNYIDNDSSNKLKNGFRVECKPTSSFQRVVQRAVLHVQSTGRGIVTGANILVALFSEPDSHATYFLQEQEMTLYDAVNFISHGISKRKEFANFQSKLNVDGSSAGSDGEGFVNDYQAKTDLNLFPALSAYCVDLTEKVKKGKVDILVGRHEEINRTIQILCRRSKNNPLYVGDPGVGKTAIAEGFAKQIVDGMVPDILLGARIFSLDMGNLIAGTRYRGDFEERIKKIVKEIESYANAILYIDEIHTLVGAGSASGISVDASNLLKPALSSGAVRCIGSTTYSEYRQFFEKDKALVRRFQKIDVSEPSIEDAIEIVKGIKPYFEEHHQLRYSKEAIRAAVQ…	MLNQELELSLNMAFARAREHRHEFMTVEHLLLALLSNPSAREALEACTVDLTVLRQELETFIEQTTPTLPQNDEERDTQPTLSFQRVLQRAVFHVQSSGRSEVSGANVLVAIFSEQESQAAYLLRKHDVSRLDVVNFISHGTRKEE-------------SGPAANPENPVNEEQAGGE----ERMENFTTNLNQLARVGGIDPLIGRDSELERTIQVLCRRRKNNPLLVGESGVGKTAIAEGLAWRIVQGDVPEVMADCTLYSLDIGSLLAGTKYRGDFEKRFKALLKQLEQDKSSILFIDEIHTIIGAGAASGGQVDAANLIKPLLSSGKIRVIGSTTYQEFSNIFEKDRALARRFQKIDITEPSVEETVQIINGLKPKYEAHHDVRYTAKAIRAAVE…	0	791	2042	759	51.65	392	346	533	5	21	70.22	44562	1	FMFLSNEQNE2KLVS1HNQM1LFVALR1NR1RHNR2YFAM1LV7ILDSDNSPDS1ARIEVAMLLESA1NT3KT2KRNQNE1LENTYF1DENQDTSTSPNTKLLPKQ1GDFEREVREDCTKQ2SL5VL4LF4TS2GSIE1TS3IV3LI3PQDE1HQ1TA1FL1QREKQHEDMVTSLRYL1AV7ITSR1REKEE-F-A-N-F-Q-S-K-L-N-V-D-G-1SGAPGASADNGP1GNFP2DEYE2KGTGDEL-N-L-F-PEARLMSEANYFCTVTDN1TNEQKLVAKRKV1KGVI1IP1VI2HDES1ILNE4IV4SR5YL2DEPS10FL1KWQR2DQ1MD2DEIVLMLAGDACRTILFY3MI1NS1IL3RK6EK1IF1KAILVL1EQIL1SQYDAKNSAS2YF…	N/A	N/A	N/A	N/A	N/A	N/A	N/A	N/A	95	95
CLIBASIA_00325	0	CLIBASIA_00325	Q75WC5#PHI:824__PHI:6838#GyrA#337#Burkholderia_glumae#chemistry_target:_sensitivity_to_chemical__chemistry_target:_resistance_to_chemical__reduced_virulence__loss_of_pathogenicity	Q75WC5#PHI:824__PHI:6838#GyrA#337#Burkholderia_glumae#chemistry_target:_sensitivity_to_chemical__chemistry_target:_resistance_to_chemical__reduced_virulence__loss_of_pathogenicity	0	0	Q75WC5#PHI:824__PHI:6838#GyrA#337#Burkholderia_glumae#chemistry_target:_sensitivity_to_chemical__chemistry_target:_resistance_to_chemical__reduced_virulence__loss_of_pathogenicity	Q75WC5#PHI:824__PHI:6838#GyrA#337#Burkholderia_glumae#chemistry_target:_sensitivity_to_chemical__chemistry_target:_resistance_to_chemical__reduced_virulence__loss_of_pathogenicity	19	897	11	849	VSITDEMQNSYLTYAINVILGRAIPDLRDGLKPVHRRILFGMMQMGVEWNKKYVKCARISGEVMGKYHPHGNAAIYDALARMAQDWSLRLLLIEGQGNFGSVDGDPPAAERYTECRLQKAAHFLLDDLGKDTVDFRPNYDGSFQEPVVLCARYPNVLVNGGGGIAVGMATNIPTHNLGEVVDGCVAVIDNPDIDLDALMEIIRGPDFPTGAVILGRTGIKNAYATGRGSIVIRGVSHIEKTS-GDREQIVVTEIPYQVNKAAMLEKIAELVREKRIVDIADLRDESDRQGYRVVIELKRGASADVILNQLYRYTSLQSLFSVNMVALNGYKPERFTLIGILKAFVAFREEVVVRRTKYLLNKARDRAHVLVGLAIAVANLDEVVRIIRFSPNPETARRE…	ISLEEEMRRSYLDYAMSVIVGRALPDVRDGLKPVHRRVLFAMHELNNDWNRAYKKSARIVGDVIGKYHPHGDSAVYDTIVRMAQDFSLRYMLVDGQGNFGSVDGDNAAAMRYTEIRMAKIGHELLADIDKETVDFGPNYDGSESEPTILPARIPNLLINGSSGIAVGMATNIPPHNLSEVVDACHHLLANPEATVDELIEIIPAPDFPTAGIIYGVAGVRDGYRTGRGRVVMRAATHFEEIDRGQRMAIIVDELPYQVNKRSLLERIAELVNEKKLEGISDIRDESDKSGMRVVIELKRGEVPEVVLNNLYKSTQLQDTFGMNMVALVDGQPKLLNLKEMLVCFLAHRREVLTRRTIYELRKARERGHVLEGLAVALANIDEFIEIIKAAPTPPIARQA…	0	746	1927	897	43.92	394	427	561	7	76	62.54	44562	1	VI1ILTEDE2QRNR3TD2IMNS2LV3IL2LV10IV2GA1MHQEMLGNVNED2KRKA1VK1CS3SV1ED1MI7NDAS1IV2ATLIAV5WF3LYLM1IVED11PNPA2EM4CI1LMQA1AIAG1FE2DA1LIGD1DE4RG6FEQS2VTVI1CP2YI2VL1VI2GSGS11TP3GS4GA1VHAHVLILDA2DEIADTLV1AE1MI3RPGA5GAAGVI1LY1RVTA1IVKRNDAG1AR4SRIV1IM1GAVAST1IF1KETISD-R1DQ1EMQA1VI1TD1IL6ARASML2KR5RN2RKILVEDG1AS1LI5RKQS1YM9AESVAPDE1IV2QN2RKYS1SQ2SDLT1SGVM5NVGDYGKQ1EKRLFLTN1IKGEIM1KVAC1VL1FH1ER2VLVT3KI1LE1NR…	N/A	N/A	N/A	N/A	N/A	N/A	N/A	N/A	97	97
CLIBASIA_00325	0	CLIBASIA_00325	Q75WC1#PHI:849#GyrA#337#Burkholderia_glumae#chemistry_target:_resistance_to_chemical__chemistry_target:_sensitivity_to_chemical	Q75WC1#PHI:849#GyrA#337#Burkholderia_glumae#chemistry_target:_resistance_to_chemical__chemistry_target:_sensitivity_to_chemical	0	0	Q75WC1#PHI:849#GyrA#337#Burkholderia_glumae#chemistry_target:_resistance_to_chemical__chemistry_target:_sensitivity_to_chemical	Q75WC1#PHI:849#GyrA#337#Burkholderia_glumae#chemistry_target:_resistance_to_chemical__chemistry_target:_sensitivity_to_chemical	19	897	11	849	VSITDEMQNSYLTYAINVILGRAIPDLRDGLKPVHRRILFGMMQMGVEWNKKYVKCARISGEVMGKYHPHGNAAIYDALARMAQDWSLRLLLIEGQGNFGSVDGDPPAAERYTECRLQKAAHFLLDDLGKDTVDFRPNYDGSFQEPVVLCARYPNVLVNGGGGIAVGMATNIPTHNLGEVVDGCVAVIDNPDIDLDALMEIIRGPDFPTGAVILGRTGIKNAYATGRGSIVIRGVSHIEKTS-GDREQIVVTEIPYQVNKAAMLEKIAELVREKRIVDIADLRDESDRQGYRVVIELKRGASADVILNQLYRYTSLQSLFSVNMVALNGYKPERFTLIGILKAFVAFREEVVVRRTKYLLNKARDRAHVLVGLAIAVANLDEVVRIIRFSPNPETARRE…	ISLEEEMRRSYLDYAMSVIVGRALPDVRDGLKPVHRRVLFAMHELNNDWNRAYKKSARIVGDVIGKYHPHGDIAVYDTIVRMAQDFSLRYMLVDGQGNFGSVDGDNAAAMRYTEIRMAKIGHELLADIDKETVDFGPNYDGSESEPTILPARIPNLLINGSSGIAVGMATNIPPHNLSEVVDACHHLLANPEATVDELIEIIPAPDFPTAGIIYGVAGVRDGYRTGRGRVVMRAATHFEEIDRGQRMAIIVDELPYQVNKRSLLERIAELVNEKKLEGISDIRDESDKSGMRVVIELKRGEVPEVVLNNLYKSTQLQDTFGMNMVALVDGQPKLLNLKEMLVCFLAHRREVLTRRTIYELRKARERGHVLEGLAVALANIDEFIEIIKAAPTPPIARQA…	0	744	1922	897	43.92	394	427	559	7	76	62.32	44562	1	VI1ILTEDE2QRNR3TD2IMNS2LV3IL2LV10IV2GA1MHQEMLGNVNED2KRKA1VK1CS3SV1ED1MI7NDAI1IV2ATLIAV5WF3LYLM1IVED11PNPA2EM4CI1LMQA1AIAG1FE2DA1LIGD1DE4RG6FEQS2VTVI1CP2YI2VL1VI2GSGS11TP3GS4GA1VHAHVLILDA2DEIADTLV1AE1MI3RPGA5GAAGVI1LY1RVTA1IVKRNDAG1AR4SRIV1IM1GAVAST1IF1KETISD-R1DQ1EMQA1VI1TD1IL6ARASML2KR5RN2RKILVEDG1AS1LI5RKQS1YM9AESVAPDE1IV2QN2RKYS1SQ2SDLT1SGVM5NVGDYGKQ1EKRLFLTN1IKGEIM1KVAC1VL1FH1ER2VLVT3KI1LE1NR…	N/A	N/A	N/A	N/A	N/A	N/A	N/A	N/A	97	97
CLIBASIA_00325	0	CLIBASIA_00325	Q75WC4#PHI:852#GyrA#337#Burkholderia_glumae#chemistry_target:_resistance_to_chemical__chemistry_target:_sensitivity_to_chemical	Q75WC4#PHI:852#GyrA#337#Burkholderia_glumae#chemistry_target:_resistance_to_chemical__chemistry_target:_sensitivity_to_chemical	0	0	Q75WC4#PHI:852#GyrA#337#Burkholderia_glumae#chemistry_target:_resistance_to_chemical__chemistry_target:_sensitivity_to_chemical	Q75WC4#PHI:852#GyrA#337#Burkholderia_glumae#chemistry_target:_resistance_to_chemical__chemistry_target:_sensitivity_to_chemical	19	897	11	849	VSITDEMQNSYLTYAINVILGRAIPDLRDGLKPVHRRILFGMMQMGVEWNKKYVKCARISGEVMGKYHPHGNAAIYDALARMAQDWSLRLLLIEGQGNFGSVDGDPPAAERYTECRLQKAAHFLLDDLGKDTVDFRPNYDGSFQEPVVLCARYPNVLVNGGGGIAVGMATNIPTHNLGEVVDGCVAVIDNPDIDLDALMEIIRGPDFPTGAVILGRTGIKNAYATGRGSIVIRGVSHIEKTS-GDREQIVVTEIPYQVNKAAMLEKIAELVREKRIVDIADLRDESDRQGYRVVIELKRGASADVILNQLYRYTSLQSLFSVNMVALNGYKPERFTLIGILKAFVAFREEVVVRRTKYLLNKARDRAHVLVGLAIAVANLDEVVRIIRFSPNPETARRE…	ISLEEEMRRSYLDYAMSVIVGRALPDVRDGLKPVHRRVLFAMHELNNDWNRAYKKSARIVGDVIGKYHPHGDRAVYDTIVRMAQDFSLRYMLVDGQGNFGSVDGDNAAAMRYTEIRMAKIGHELLADIDKETVDFGPNYDGSESEPTILPARIPNLLINGSSGIAVGMATNIPPHNLSEVVDACHHLLANPEATVDELIEIIPAPDFPTAGIIYGVAGVRDGYRTGRGRVVMRAATHFEEIDRGQRMAIIVDELPYQVNKRSLLERIAELVNEKKLEGISDIRDESDKSGMRVVIELKRGEVPEVVLNNLYKSTQLQDTFGMNMVALVDGQPKLLNLKEMLVCFLAHRREVLTRRTIYELRKARERGHVLEGLAVALANIDEFIEIIKAAPTPPIARQA…	0	744	1922	897	43.92	394	427	559	7	76	62.32	44562	1	VI1ILTEDE2QRNR3TD2IMNS2LV3IL2LV10IV2GA1MHQEMLGNVNED2KRKA1VK1CS3SV1ED1MI7NDAR1IV2ATLIAV5WF3LYLM1IVED11PNPA2EM4CI1LMQA1AIAG1FE2DA1LIGD1DE4RG6FEQS2VTVI1CP2YI2VL1VI2GSGS11TP3GS4GA1VHAHVLILDA2DEIADTLV1AE1MI3RPGA5GAAGVI1LY1RVTA1IVKRNDAG1AR4SRIV1IM1GAVAST1IF1KETISD-R1DQ1EMQA1VI1TD1IL6ARASML2KR5RN2RKILVEDG1AS1LI5RKQS1YM9AESVAPDE1IV2QN2RKYS1SQ2SDLT1SGVM5NVGDYGKQ1EKRLFLTN1IKGEIM1KVAC1VL1FH1ER2VLVT3KI1LE1NR…	N/A	N/A	N/A	N/A	N/A	N/A	N/A	N/A	97	97
CLIBASIA_00325	0	CLIBASIA_00325	Q75WC3#PHI:851#GyrA#337#Burkholderia_glumae#chemistry_target:_resistance_to_chemical__chemistry_target:_sensitivity_to_chemical	Q75WC3#PHI:851#GyrA#337#Burkholderia_glumae#chemistry_target:_resistance_to_chemical__chemistry_target:_sensitivity_to_chemical	0	0	Q75WC3#PHI:851#GyrA#337#Burkholderia_glumae#chemistry_target:_resistance_to_chemical__chemistry_target:_sensitivity_to_chemical	Q75WC3#PHI:851#GyrA#337#Burkholderia_glumae#chemistry_target:_resistance_to_chemical__chemistry_target:_sensitivity_to_chemical	19	897	11	849	VSITDEMQNSYLTYAINVILGRAIPDLRDGLKPVHRRILFGMMQMGVEWNKKYVKCARISGEVMGKYHPHGNAAIYDALARMAQDWSLRLLLIEGQGNFGSVDGDPPAAERYTECRLQKAAHFLLDDLGKDTVDFRPNYDGSFQEPVVLCARYPNVLVNGGGGIAVGMATNIPTHNLGEVVDGCVAVIDNPDIDLDALMEIIRGPDFPTGAVILGRTGIKNAYATGRGSIVIRGVSHIEKTS-GDREQIVVTEIPYQVNKAAMLEKIAELVREKRIVDIADLRDESDRQGYRVVIELKRGASADVILNQLYRYTSLQSLFSVNMVALNGYKPERFTLIGILKAFVAFREEVVVRRTKYLLNKARDRAHVLVGLAIAVANLDEVVRIIRFSPNPETARRE…	ISLEEEMRRSYLDYAMSVIVGRALPDVRGGLKPVHRRVLFAMHELNNDWNRAYKKSARIVGDVIGKYHPHGDIAVYDTIVRMAQDFSLRYMLVDGQGNFGSVDGDNAAAMRYTEIRMAKIGHELLADIDKETVDFGPNYDGSESEPTILPARIPNLLINGSSGIAVGMATNIPPHNLSEVVDACHHLLANPEATVDELIEIIPAPDFPTAGIIYGVAGVRDGYRTGRGRVVMRAATHFEEIDRGQRMAIIVDELPYQVNKRSLLERIAELVNEKKLEGISDIRDESDKSGMRVVIELKRGEVPEVVLNNLYKSTQLQDTFGMNMVALVDGQPKLLNLKEMLVCFLAHRREVLTRRTIYELRKARERGHVLEGLAVALANIDEFIEIIKAAPTPPIARQA…	0	743	1919	897	43.81	393	428	559	7	76	62.32	44562	1	VI1ILTEDE2QRNR3TD2IMNS2LV3IL2LV1DG8IV2GA1MHQEMLGNVNED2KRKA1VK1CS3SV1ED1MI7NDAI1IV2ATLIAV5WF3LYLM1IVED11PNPA2EM4CI1LMQA1AIAG1FE2DA1LIGD1DE4RG6FEQS2VTVI1CP2YI2VL1VI2GSGS11TP3GS4GA1VHAHVLILDA2DEIADTLV1AE1MI3RPGA5GAAGVI1LY1RVTA1IVKRNDAG1AR4SRIV1IM1GAVAST1IF1KETISD-R1DQ1EMQA1VI1TD1IL6ARASML2KR5RN2RKILVEDG1AS1LI5RKQS1YM9AESVAPDE1IV2QN2RKYS1SQ2SDLT1SGVM5NVGDYGKQ1EKRLFLTN1IKGEIM1KVAC1VL1FH1ER2VLVT3KI1LE1…	N/A	N/A	N/A	N/A	N/A	N/A	N/A	N/A	97	97
CLIBASIA_00325	0	CLIBASIA_00325	Q75WC2#PHI:850#GyrA#337#Burkholderia_glumae#chemistry_target:_resistance_to_chemical__chemistry_target:_sensitivity_to_chemical	Q75WC2#PHI:850#GyrA#337#Burkholderia_glumae#chemistry_target:_resistance_to_chemical__chemistry_target:_sensitivity_to_chemical	0	0	Q75WC2#PHI:850#GyrA#337#Burkholderia_glumae#chemistry_target:_resistance_to_chemical__chemistry_target:_sensitivity_to_chemical	Q75WC2#PHI:850#GyrA#337#Burkholderia_glumae#chemistry_target:_resistance_to_chemical__chemistry_target:_sensitivity_to_chemical	19	897	11	849	VSITDEMQNSYLTYAINVILGRAIPDLRDGLKPVHRRILFGMMQMGVEWNKKYVKCARISGEVMGKYHPHGNAAIYDALARMAQDWSLRLLLIEGQGNFGSVDGDPPAAERYTECRLQKAAHFLLDDLGKDTVDFRPNYDGSFQEPVVLCARYPNVLVNGGGGIAVGMATNIPTHNLGEVVDGCVAVIDNPDIDLDALMEIIRGPDFPTGAVILGRTGIKNAYATGRGSIVIRGVSHIEKTS-GDREQIVVTEIPYQVNKAAMLEKIAELVREKRIVDIADLRDESDRQGYRVVIELKRGASADVILNQLYRYTSLQSLFSVNMVALNGYKPERFTLIGILKAFVAFREEVVVRRTKYLLNKARDRAHVLVGLAIAVANLDEVVRIIRFSPNPETARRE…	ISLEEEMRRLYLDYAMSVIVGRALPDVRDGLKPVHRRVLFAMHELNNDWNRAYKKSARIVGDVIGKYHPHGDRAVYDTIVRMAQDFSLRYMLVDGQGNFGSVDGDNAAAMRYTEIRMAKIGHELLADIDKETVDFGPNYDGSESEPTILPARIPNLLINGSSGIAVGMATNIPPHNLSEVVDACHHLLANPEATVDELIEIIPAPDFPTAGIIYGVAGVRDGYRTGRGRVVMRAATHFEEIDRGQRMAIIVDELPYQVNKRSLLERIAELVNEKKLEGISDIRDESDKSGMRVVIELKRGEVPEVVLNNLYKSTQLQDTFGMNMVALVDGQPKLLNLKEMLVCFLAHRREVLTRRTIYELRKARERGHVLEGLAVALANIDEFIEIIKAAPTPPIARQA…	0	743	1919	897	43.81	393	428	559	7	76	62.32	44562	1	VI1ILTEDE2QRNRSL2TD2IMNS2LV3IL2LV10IV2GA1MHQEMLGNVNED2KRKA1VK1CS3SV1ED1MI7NDAR1IV2ATLIAV5WF3LYLM1IVED11PNPA2EM4CI1LMQA1AIAG1FE2DA1LIGD1DE4RG6FEQS2VTVI1CP2YI2VL1VI2GSGS11TP3GS4GA1VHAHVLILDA2DEIADTLV1AE1MI3RPGA5GAAGVI1LY1RVTA1IVKRNDAG1AR4SRIV1IM1GAVAST1IF1KETISD-R1DQ1EMQA1VI1TD1IL6ARASML2KR5RN2RKILVEDG1AS1LI5RKQS1YM9AESVAPDE1IV2QN2RKYS1SQ2SDLT1SGVM5NVGDYGKQ1EKRLFLTN1IKGEIM1KVAC1VL1FH1ER2VLVT3KI1LE1…	N/A	N/A	N/A	N/A	N/A	N/A	N/A	N/A	97	97
CLIBASIA_00375	0	CLIBASIA_00375	Q8ZPL7#PHI:10048#FumC#28901#Salmonella_enterica#reduced_virulence	Q8ZPL7#PHI:10048#FumC#28901#Salmonella_enterica#reduced_virulence	0	0	Q8ZPL7#PHI:10048#FumC#28901#Salmonella_enterica#reduced_virulence	Q8ZPL7#PHI:10048#FumC#28901#Salmonella_enterica#reduced_virulence	1	460	1	460	MTNTRNEQDSFGTMKVQEDRYWGAQAQRSLENFKIGEEKQPLVIIRALGIIKQAAARVNIELGKLDPKIGEAIVKASEEVINGKLDDHFPLVVWQTGSGTQSNMNVNEVISNRAIEILGGVMGSKSPVHPNDHVNLCQSSNDTYPTAIHIACAERIVHRLLPTLRNLHVALTKKISDFQDIIKIGRTHTQDATPLTLGQEFSGYATQVKNSIKRIEMTLDGLYELAQGGTAVGTGLNTPVGFAEKVAQNIRDITGLPFITAPNKFEALACHDAIAFCHGAINTSATALFKIANDIRFLGSGPRSGLGELMLPENEPGSSIMPGKVNPTQCEAITQVCAHIFGNHAAITFANSQGHFELNVYKPMIAYNVLQSIQLLSDSIDSFTINCIEGIQARKENIQ…	MVTVRREKDSMGAIEVPADKLWGAQTQRSLEHFRISTEKMPVSLIHALALTKRAAAKVNQDLGLLAAEKASAIIQAADEVLAGKHADEFPLAIWQTGSGTQSNMNMNEVLANRASEILGGVRGMERKVHPNDDVNKSQSSNDVFPTAMHVAALLALREHLIPQLSALTDTLRDKSHAFADIVKIGRTHLQDATPLTLGQEISGWVAMLEHNLRHIEHSLPHVAELALGGTAVGTGLNTHPEYARRVAEELATITAAPFVTAPNKFEALATCDALVQAHGALKGLAASLMKIANDVRWLASGPRCGIGEIAIPENEPGSSIMPGKVNPTQCEAVTMLCCQVMGNDVAINMGGASGNFELNVYRPMVIHNFLQTVRLLADGMESFNKHCASGIEPNRERIT…	0	526	1355	460	55	253	207	328	0	0	71.3	44562	1	1TVNTTV1NR1QK2FM1TAMIKE1QPEA1RKYL4AT5NH1KR1GSET2QM1LVVSIL1RH2GAILIT1QR3RK2IQED2KL1DAPAKEIKGAES2VIKQ1SAED2ILNA2LHDA1HE3VAVI12VM3ILSA3IS6MR1SMKESRPK5HD2LKCS5TVYF3IM1IV1CAALELRAILVRHERH1LI1TQ1RSNA1HTVDAT1TRKD1ISSHDA1QA2IV6TL11FI2YWAVTAQMVLKENHSNILKRRH2MHTS1DPGHLVYA3QL11PHVPGEFY1ERKR2QENEILRADT2GALA2IV10CTHC2ILAVFQCA3ILNKTGSL1TAAS1FM5IV1FW1GA4SC1LI2LIMALI21IV1QMVL1ACHQIVFM2HDAV2TNFMAGNGSAQS1HN6KR2IVA…	N/A	N/A	N/A	N/A	N/A	N/A	N/A	N/A	99	99
CLIBASIA_00590	0	CLIBASIA_00590	A0A380PIP1#PHI:11030#BipA#632#Yersinia_pestis#reduced_virulence	A0A380PIP1#PHI:11030#BipA#632#Yersinia_pestis#reduced_virulence	0	0	A0A380PIP1#PHI:11030#BipA#632#Yersinia_pestis#reduced_virulence	A0A380PIP1#PHI:11030#BipA#632#Yersinia_pestis#reduced_virulence	19	616	5	602	IRNIAIIAHVDHGKTTLVDELLKQSGVFRDNQRVSERVMDCNDLEKERGITILAKVTSIVWNDVRINIVDTPGHADFGGEVERILCMVESVVVLVDAAEGPMPQTKFVVGKALKIGLRPIVVVNKVDRSDARADEVINEVFDLFSALDATDAQLDFPILYGSGRFGWM-SDSSDGSRDQGMVPLLNLIVDHVPPP-VISEGEFKMIGTILEKDPFLGRIVTGRIHSGTIKSNQNIKALSPDGALVEVGRVSKILAFRGIDRQPIDEAHAGDIVSIAGLVKATVADTFCDPSIDEPLKAQPIDPPTVTMTFGVNDSPLAGTEGDKVTSRMIRDRLFKEAEGNIALKIEESSSKDAFFVSGRGELQLAVLIETMRREGFELAVSRPRVVIKKEGDSLLEPI…	LRNIAIIAHVDHGKTTLVDKLLQQSGTFGERTEATERVMDSNDLEKERGITILAKNTAINWKDYRINIVDTPGHADFGGEVERVMSMVDSVLLVVDAMDGPMPQTRFVTKKAFAHGLKPIVVINKVDRPGARPDWVVDQVFDLFVNLDATDEQLDFPIIYASALMGIAGEDHNDMAED--MTPLYQAIIDHVPAPDVDSSGPLQMQISQLDYNNYVGVIGIGRIKRGIVKPNQQVTVIDSEGK-TRNGKVGKVLGHMGLERIETTQAEAGDIVAITGLGELNISDTICDVNAVEALPPLSVDEPTVTMYFCVNTSPFCGKEGKYVTSRQILDRLNKELIHNVALRVEETEDADAFRVSGRGELHLSVLIENMRREGFELAVSRPKVINRIIDGRNQEPF…	0	643	1658	601	55.41	333	262	426	5	6	70.88	44562	1	IL18EK2KQ3VT1RGDENRQTREVAST5CS14VN1SA1VN1NK1VY19IVLMCS2ED2VLVLLV3AMED6KR2VTGK2LFKAIH2RK4VI5SPDG2AP1EW1IVNDEQ5SVAN5AE6LI1GA1GARLFM1WIMA-GSE1SHSN1GMSARE1Q-G-1VT2LYNQLA1VI4PA1-D1ID1ES1EPFLKQ1IQGITSIQ1EDKYDNPNFYLV1RV1VGTI3HKSR1TIIV1SP2NQIVKTAVLISDPSDE1AKL-VTERVN1RK1SG1IV1AGFHRM1ILDE1QIPEITDTEQ1HE5SA1AT2VGKEALTNVIAS2FI2PVSNIADV1PA1KPAPQLPSIV1PE5TY1GC2DT2LFAC1TK2DKKY4MQ1RL3FN2ALEIGH1IV2KRIV2STSESDKA3FR…	N/A	N/A	N/A	N/A	N/A	N/A	N/A	N/A	96	96
CLIBASIA_00775	0	CLIBASIA_00775	Q2YPX3#PHI:8922#Lon#235#Brucella_abortus#unaffected_pathogenicity__reduced_virulence	Q2YPX3#PHI:8922#Lon#235#Brucella_abortus#unaffected_pathogenicity__reduced_virulence	0	0	Q2YPX3#PHI:8922#Lon#235#Brucella_abortus#unaffected_pathogenicity__reduced_virulence	Q2YPX3#PHI:8922#Lon#235#Brucella_abortus#unaffected_pathogenicity__reduced_virulence	22	820	17	812	GADGIIYPLLPLRDIVVFPYMIVPLFVGREKSVRALDEAMNSHKKIILVTQMNSNDENPIASSVYRIGTIVDIVQILRLPDGTVKILVEGSVRARIVEYIEREDFLEAITQVLPDPTEDPVELEALSRSVIAEFSNYIKLNKKISPEVIGITSQIEGFSKLADVIAANLSIKVAERQKILEAVSVKERLEMLLVFMESEISVLQVEKRIRSRVKRQMEKTQREYYLHEQMKAIQKELDNGEEGRDEISDFEARISKIRLSKEAREKALSELQKLRQMNPLSAESSVVRNYLDWLLGVPWDKKSKTKKNLDFAIRILDQDHFGLEKVKERIIEYLAVQMRVIKNKGLILCFVGPPGVGKTSLAQSIAKATGRQYVRMSLGGVYDEADIRGHRRTYIGSMP…	GADGL-YAVLPLRDIVVFPHMIVPLFVGREKSIRALEEVMGVDKQILLATQKNAADDDPAPDAIYEIGTIANVLQLLKLPDGTVKVLVEGTARAKISKFTDREDYHEAYAAALQEPEEDAVEIEALARSVVPDFENYVKLNKKISPEVVGAASQIDDYSKLADTVASHLAIKIPEKQEMLSVLSVRERLEKALSFMEAEISVLQVEKRIRSRVKRQMEKTQREYYLNEQMKAIQKELGDSEDGRDEVAEIEERITKTKLSKEAREKALAELKKLRSMSPMSAEATVVRNYLDWLLSIPWGKKSKVKQDLNFAQEVLDAEHFGLGKVKERIVEYLAVQARSTKIKGPILCLVGPPGVGKTSLARSIAKATGREYVRMSLGGVRDEAEIRGHRRTYIGSMP…	0	1130	2922	802	67.46	541	252	680	3	9	84.79	44562	1	4ILI-1PALV10YH12VI3DE1AV1NGSVHD1KQ1IL1VA2MK1SANA1EDND1IAAPSDSAVI1RE4VADNIVVL1IL1RK7IV4STVA2RK1VSEKYFITED3FYLH2IYTAQAVA1PQDE1TE2PA2LI3SA3IVAPED1SE2IV10IV1IATA3EDGDFY5VTIV1ASNH1SA2VIAP1RK1KEIM1ESAVVL2KR4MKLA1VS3SA28HN10DGNDGS1ED4IVSADEFI1AE2ST1ITRK10SA2QK3QS1NS1LM3SAST10GSVI2DG4TV1KQND1DN2IQREIV2QADE4EG6IV6MA1VSIT1NI2LP3FL12QR8QE9YR3DE14RKIV3LM1RK2RK4LF9SQ1LF5AS1LM6AE2SAST1VM11DN3IVMT4LM3LV2ML13ED3…	N/A	N/A	N/A	N/A	N/A	N/A	N/A	N/A	97	97
CLIBASIA_00775	0	CLIBASIA_00775	Q9KQS8#PHI:6583#LonA#666#Vibrio_cholerae#reduced_virulence	Q9KQS8#PHI:6583#LonA#666#Vibrio_cholerae#reduced_virulence	0	0	Q9KQS8#PHI:6583#LonA#666#Vibrio_cholerae#reduced_virulence	Q9KQS8#PHI:6583#LonA#666#Vibrio_cholerae#reduced_virulence	29	801	12	784	PLLPLRDIVVFPYMIVPLFVGREKSVRALDEAMNSHKKIILVTQMNSNDENPIASSVYRIGTIVDIVQILRLPDGTVKILVEGSVRARIVEYIEREDFLEAITQVLPDPTEDPVELEALSRSVIAEFSNYIKLNKKISPEVIGITSQIEGFSKLADVIAANLSIKVAERQKILEAVSVKERLEMLLVFMESEISVLQVEKRIRSRVKRQMEKTQREYYLHEQMKAIQKELDNGEEGRDEISDFEARISKIRLSKEAREKALSELQKLRQMNPLSAESSVVRNYLDWLLGVPWDKKSKTKKNLDFAIRILDQDHFGLEKVKERIIEYLAVQMRVIKNKGLILCFVGPPGVGKTSLAQSIAKATGRQYVRMSLGGVYDEADIRGHRRTYIGSMPGRIIQSL…	PVLPLRDVVVYPHMVIPLFVGREKSIQCLEAAMDNNKQVLLVAQKKAETDEPKVADLFEVGTVATILQLLKLPDGTVKVLVEGQQRAKITQFYEEEYFF-ADAQYLVTPELDEREQEVVVRSAINQFEGFIKLNKKIPPEVLTSLNGIDEAARLADTIAAHMPLKLVDKQKVLELLDVSERLEFLMGQMESEIDLLQVEKRIRTRVKKQMEKSQREYYLNEQMKAIQKELGEMDDAPDEFETLKKKIEESKMPKEARDKAEQELHKLKMMSPMSAEATVVRSYIDWMVNVPWTKRSKVKKDLSKAEEILNADHYGLERVKERILEYLAVQSRINKLKGPILCLVGPPGVGKTSLGRSIAAATGRQYVRMALGGVRDEAEIRGHRRTYIGSMPGKLIQKM…	0	919	2375	774	58.14	450	322	594	2	2	76.74	44562	1	1LV5IV2FY1YH1IVVI9VIRQAC1DEEA2NDSNHN1KQIVIL2TA1MKNKSANEDTEDNE1IKAVSASDVLYFREIV2IVVADT1VL1IL1RK7IV4SQVQ2RK1VTEQYFIY1RE1DY1LFE-1IDTA1VY1PVDT1TEEL1PEVR1LQ1AVLVSV2VA1ANEQ1SENGYF7SP3ILGTISTLSNQG1EDGEFASAKR3VT3NHLMSPIL1VLAVEDRK2IV2ALVLSD1KS4MF1LMVGFQ5SDVL8ST3RK4TS6HN10DGNEGMEDEDGARP2IFSEDTFLEKAKRK1SEKEISRKLMSP4ED2LESQ2QH2RKQM1NS1LM3SAST3NS1LI2LMLVGN3DT1KR2TV2ND1DSFK1IERE2DNQA2FY3KR5IL6MS1VIIN1NL2LP3FL1…	N/A	N/A	N/A	N/A	N/A	N/A	N/A	N/A	94	94
CLIBASIA_00775	0	CLIBASIA_00775	D4HY24#PHI:7160#Lon#552#Erwinia_amylovora#increased_virulence_(hypervirulence)__loss_of_pathogenicity	D4HY24#PHI:7160#Lon#552#Erwinia_amylovora#increased_virulence_(hypervirulence)__loss_of_pathogenicity	0	0	D4HY24#PHI:7160#Lon#552#Erwinia_amylovora#increased_virulence_(hypervirulence)__loss_of_pathogenicity	D4HY24#PHI:7160#Lon#552#Erwinia_amylovora#increased_virulence_(hypervirulence)__loss_of_pathogenicity	29	791	12	775	PLLPLRDIVVFPYMIVPLFVGREKSVRALDEAMNSHKKIILVTQMNSNDENPIASSVYRIGTIVDIVQILRLPDGTVKILVEGSVRARIVEYIEREDFLEAITQVLPDPTEDPVELEALSRSVIAEFSNYIKLNKKISPEVIGITSQIEGFSKLADVIAANLSIKVAERQKILEAVSVKERLEMLLVFMESEISVLQVEKRIRSRVKRQMEKTQREYYLHEQMKAIQKELDNGEEGRDEISDFEARISKIRLSKEAREKALSELQKLRQMNPLSAESSVVRNYLDWLLGVPWDKKSKTKKNLDFAIRILDQDHFGLEKVKERIIEYLAVQMRVIKNKGLILCFVGPPGVGKTSLAQSIAKATGRQYVRMSLGGVYDEADIRGHRRTYIGSMPGRIIQSL…	PVLPLRDVVVYPHMVIPLFVGREKSIRCLEAAMDHDKKIMLVAQKEASTDEPGINDLFSVGTVASILQMLKLPDGTVKVLVEGLQRARISALSDNGDHFTAKAEYLTSPEIEEREQEVLVRTAINQFEGYIKLNKKIPPEVLTSLNSIDDAARLADTVAAHMPLKLSDKQSVLEMSDVDERLEYLMAMMESEIDLLQVEKRIRNRVKKQMEKSQREYYLNEQMKAIQKELGEMDDAPDENEALKRKIDAARMPKEAREKTEAELQKLKMMSPMSAEATVVRGYIDWMVQVPWNARSKVKKDLQKAQETLDTDHFGLERVKDRILEYLAVQSRVSKIKGPILCLVGPPGVGKTSLGQSIAKATGRKYVRMALGGVRDEAEIRGHRRTYIGSMPGKLIQKM…	0	918	2373	764	59.03	451	312	583	1	1	76.31	44562	1	1LV5IV2FY1YH1IVVI9VI1AC1DEEA2NDSHHD3IM2TA1MKNESANSDTEDNE1IGAISNSDVLYFRSIV2IVVADS1VL1IM1RK7IV4SLVQ4VSEAYLISEDRNEG1FHLFET1IKTAQEVY1PTDS1TEEIDEPEVR1LQ1AV1SV1STVA1ANEQ1SENG8SP3ILGTISTLSNQS1EDGDFASAKR3VTIV2NHLMSPIL1VLASEDRK1KSIV2AMVSSD1KD4MY1LMVAFM5SDVL8SN3RK4TS6HN10DGNEGMEDEDGARP2INSEDAFLEKARRK1SDKAIA1LMSP6ATLESA5RKQM1NS1LM3SAST3NG1LI2LMLVGQ3DNKAKR2TV2ND1DQFK1IQREIT2QT6KR2ED2IL6MS2IS1NI2LP3FL11AG9QK4…	N/A	N/A	N/A	N/A	N/A	N/A	N/A	N/A	93	93
CLIBASIA_00775	0	CLIBASIA_00775	A0A2K8W3I0#PHI:10540#Lon#1089444#Dickeya_solani#reduced_virulence	A0A2K8W3I0#PHI:10540#Lon#1089444#Dickeya_solani#reduced_virulence	0	0	A0A2K8W3I0#PHI:10540#Lon#1089444#Dickeya_solani#reduced_virulence	A0A2K8W3I0#PHI:10540#Lon#1089444#Dickeya_solani#reduced_virulence	29	791	12	775	PLLPLRDIVVFPYMIVPLFVGREKSVRALDEAMNSHKKIILVTQMNSNDENPIASSVYRIGTIVDIVQILRLPDGTVKILVEGSVRARIVEYIEREDFLEAITQVLPDPTEDPVELEALSRSVIAEFSNYIKLNKKISPEVIGITSQIEGFSKLADVIAANLSIKVAERQKILEAVSVKERLEMLLVFMESEISVLQVEKRIRSRVKRQMEKTQREYYLHEQMKAIQKELDNGEEGRDEISDFEARISKIRLSKEAREKALSELQKLRQMNPLSAESSVVRNYLDWLLGVPWDKKSKTKKNLDFAIRILDQDHFGLEKVKERIIEYLAVQMRVIKNKGLILCFVGPPGVGKTSLAQSIAKATGRQYVRMSLGGVYDEADIRGHRRTYIGSMPGRIIQSL…	PVLPLRDVVVYPHMVIPLFVGREKSIRCLEAAMDHDKKIMLVAQKEASTDEPGVNDLFSVGTVASILQMLKLPDGTVKVLVEGLQRARITTLSDSGEHFAAQAEYLESPAIEEREQEVLMRTAINQFEGYIKLNKKIPPEVLTSLNSIDDAARLADTIAAHMPLKLADKQSVLEMSDVTERLEYLMAMMESEIDLLQVEKRIRGRVKKQMEKSQREYYLNEQMKAIQKELGEMDDAPDEQEALKRRIESASMPKEAREKAEAELQKLRMMSPMSAEATVVRSYIDWMVQVPWQARSKVKKDLVKAQEMLDSDHYGLERVKERILEYLAVQSRVSKIRGPILCLVGPPGVGKTSLGQSIAKATGRKYVRMALGGVRDEAEIRGHRRTYIGSMPGKLIQKM…	0	905	2340	764	58.51	447	316	579	1	1	75.79	44562	1	1LV5IV2FY1YH1IVVI9VI1AC1DEEA2NDSHHD3IM2TA1MKNESANSDTEDNE1IGAVSNSDVLYFRSIV2IVVADS1VL1IM1RK7IV4SLVQ4VTETYLISEDRSEGDEFHLFEA1IQTAQEVY1PEDS1TAEIDEPEVR1LQ1AV1SM1STVA1ANEQ1SENG8SP3ILGTISTLSNQS1EDGDFASAKR3VT3NHLMSPIL1VL1EDRK1KSIV2AMVSSD1KT4MY1LMVAFM5SDVL8SG3RK4TS6HN10DGNEGMEDEDGARP2IQSEDAFLEKAR2SEKSIARSLMSP7LESA6QM1NS1LM3SAST3NS1LI2LMLVGQ3DQKAKR2TV2ND1DVFK1IQREIM2QS2FY3KR5IL6MS2IS1NIKR1LP3FL11AG9QK4SA4YR…	N/A	N/A	N/A	N/A	N/A	N/A	N/A	N/A	93	93
CLIBASIA_00775	0	CLIBASIA_00775	A0A0F6AXS9#PHI:8808#Lon#28901#Salmonella_enterica#increased_virulence_(hypervirulence)	A0A0F6AXS9#PHI:8808#Lon#28901#Salmonella_enterica#increased_virulence_(hypervirulence)	0	0	A0A0F6AXS9#PHI:8808#Lon#28901#Salmonella_enterica#increased_virulence_(hypervirulence)	A0A0F6AXS9#PHI:8808#Lon#28901#Salmonella_enterica#increased_virulence_(hypervirulence)	29	795	12	779	PLLPLRDIVVFPYMIVPLFVGREKSVRALDEAMNSHKKIILVTQMNSNDENPIASSVYRIGTIVDIVQILRLPDGTVKILVEGSVRARIVEYIEREDFLEAITQVLPDPTEDPVELEALSRSVIAEFSNYIKLNKKISPEVIGITSQIEGFSKLADVIAANLSIKVAERQKILEAVSVKERLEMLLVFMESEISVLQVEKRIRSRVKRQMEKTQREYYLHEQMKAIQKELDNGEEGRDEISDFEARISKIRLSKEAREKALSELQKLRQMNPLSAESSVVRNYLDWLLGVPWDKKSKTKKNLDFAIRILDQDHFGLEKVKERIIEYLAVQMRVIKNKGLILCFVGPPGVGKTSLAQSIAKATGRQYVRMSLGGVYDEADIRGHRRTYIGSMPGRIIQSL…	PVLPLRDVVVYPHMVIPLFVGREKSIRCLEAAMDHDKKIMLVAQKEASTDEPGVNDLFTVGTVASILQMLKLPDGTVKVLVEGLQRARISALSDNGEHFSAKAEYLDSPAIDEREQEVLVRTAISQFEGYIKLNKKIPPEVLTSLNSIDDPARLADTIAAHMPLKLADKQSVLEMSDVNERLEYLMAMMESEIDLLQVEKRIRNRVKKQMEKSQREYYLNEQMKAIQKELGEMDDAPDENEALKRKIDAAKMPKEAKEKAEAELQKLKMMSPMSAEATVVRGYIDWMVQVPWNARSKVKKDLRQAQEILDTDHYGLERVKDRILEYLAVQSRVNKIKGPILCLVGPPGVGKTSLGQSIAKATGRKYIRMALGGVRDEAEIRGHRRTYIGSMPGKLIQKM…	0	897	2319	768	58.33	448	319	587	1	1	76.43	44562	1	1LV5IV2FY1YH1IVVI9VI1AC1DEEA2NDSHHD3IM2TA1MKNESANSDTEDNE1IGAVSNSDVLYFRTIV2IVVADS1VL1IM1RK7IV4SLVQ4VSEAYLISEDRNEGDEFHLFES1IKTAQEVY1PDDS1TAEI1PEVR1LQ1AV1SV1STVA1ASEQ1SENG8SP3ILGTISTLSNQS1EDGDFPSAKR3VT3NHLMSPIL1VL1EDRK1KSIV2AMVSSD1KN4MY1LMVAFM5SDVL8SN3RK4TS6HN10DGNEGMEDEDGARP2INSEDAFLEKARRK1SDKAIARKLMSP3RK3LESA5RKQM1NS1LM3SAST3NG1LI2LMLVGQ3DNKAKR2TV2ND1DRFQ1IQRE3QT2FY3KR2ED2IL6MS2IN1NI2LP3FL11AG9QK1…	N/A	N/A	N/A	N/A	N/A	N/A	N/A	N/A	94	94
CLIBASIA_00775	0	CLIBASIA_00775	A0A0U5BRC2#PHI:7866#Lon#346#Xanthomonas_citri#increased_virulence_(hypervirulence)__reduced_virulence__unaffected_pathogenicity	A0A0U5BRC2#PHI:7866#Lon#346#Xanthomonas_citri#increased_virulence_(hypervirulence)__reduced_virulence__unaffected_pathogenicity	0	0	A0A0U5BRC2#PHI:7866#Lon#346#Xanthomonas_citri#increased_virulence_(hypervirulence)__reduced_virulence__unaffected_pathogenicity	A0A0U5BRC2#PHI:7866#Lon#346#Xanthomonas_citri#increased_virulence_(hypervirulence)__reduced_virulence__unaffected_pathogenicity	29	820	12	823	PLLPLRDIVVFPYMIVPLFVGREKSVRALDEAMNSHKKIILVTQMNSNDENPIASSVYRIGTIVDIVQILRLPDGTVKILVEGSVRARIVEYIEREDFLEAI-TQVLPDPTEDPVELEALSRSVIAEFSNYIKLNKKISPEVIGITSQIEGFSKLADVIAANLSIKVAERQKILEAVSVKERLEMLLVFMESEISVLQVEKRIRSRVKRQMEKTQREYYLHEQMKAIQKELDNGEEGRDEISDFEARISKIRLSKEAREKALSELQKLRQMNPLSAESSVVRNYLDWLLGVPWDKKSKTKKNLDFAIRILDQDHFGLEKVKERIIEYLAVQMRVIKNKGLILCFVGPPGVGKTSLAQSIAKATGRQYVRMSLGGVYDEADIRGHRRTYIGSMPGRIIQS…	PVLPLRDVVVFPHMVIPLFVGRDKSMRALEKAMEADKRILLVAQKSAETDDPAAGDLYTVGTLAQVLQLLKLPDGTIKVLVEGLSRVTVDKVVEQDGALQGQGTEIEASDAREPREVEAIARSLMSLFEQYVKTNRKLPPELLQTLAGIDEPGRLADTIAAHIGVRLADKQRLLEITDIGERLELLVGLVDGEIDVQQLEKRIRGRVKSQMEKSQREYYLNEQMKAIQKELGDLDDAPGELEELARKIAEAGMPKPVETKAKAELNKLKQMSPMSAEAAVVRNYLDWLLGVSWKKRTKVRKDLKVAEDTLDADHYGLDKVKERILEYLAVQSRVKQMKGPILCLVGPPGVGKTSLGQSIAKATNRKFVRMSLGGIRDEAEIRGHRRTYVGSMPGRLVQN…	0	873	2255	812	53.45	434	358	589	3	20	72.54	44562	1	1LV5IV4YH1IVVI6ED2VM3DEEK2NESAHD1KR1IL2TA1MKNSSANEDTEDND1IA1SGSDVL1RTIV2ILVADQIVVL1IL1RK5VI1IV4SLVS1AVRTIVVDEKYVIV1RQEDDGFA1EQAGIQ-G1QEVILEPADSPDTAERDE1VR1LV2LISA2VLIMASEL1SENQ1IV1LT1KR1ILSP2VLILGQITTLSAQG1EDGEFPSGKR3VT3NHLISGIVKRVL1EDRK1KRIL2AIVTSDVIKG4ML1LVVGFLMVEDSG2SD1LQ1VL5SG3RS4TS6HN10DGNDGLEDEDGARPDG1ILSEDEFLEAARRK1SAKEIARGLMSP1EPAVREET2LKSA2QN2RK2NS1LM3SASA12PS1DK1KRST1TVKR1ND1DKFV1IERDIT…	N/A	N/A	N/A	N/A	N/A	N/A	N/A	N/A	97	97
CLIBASIA_00775	0	CLIBASIA_00775	A3MZ94#PHI:3533#LonA#715#Actinobacillus_pleuropneumoniae#reduced_virulence	A3MZ94#PHI:3533#LonA#715#Actinobacillus_pleuropneumoniae#reduced_virulence	0	0	A3MZ94#PHI:3533#LonA#715#Actinobacillus_pleuropneumoniae#reduced_virulence	A3MZ94#PHI:3533#LonA#715#Actinobacillus_pleuropneumoniae#reduced_virulence	29	807	12	793	PLLPLRDIVVFPYMIVPLFVGREKSVRALDEAMNSHKKIILVTQMNSNDENPIASSVYRIGTIVDIVQILRLPDGTVKILVEGSVRARIVEYIEREDFLEAITQVLPDPTEDPV-ELEALSRSVIAEFSNYIKLNKKISPEVIGITSQIEGFSKLADVIAANLSIKVAERQKILEAVSVKERLEMLLVFMESEISVLQVEKRIRSRVKRQMEKTQREYYLHEQMKAIQKELDNGEEG-RDEISDFEARISKIRLSKEAREKALSELQKLRQMNPLSAESSVVRNYLDWLLGVPWDKKSKTKKNLDFAIRILDQDHFGLEKVKERIIEYLAVQMRVIKNKGLILCFVGPPGVGKTSLAQSIAKATGRQYVRMSLGGVYDEADIRGHRRTYIGSMPGRIIQ…	PLLPLRDVVVFPYMVMPLFVGREKSIQALRAAMDSNKQLFLVTQQDPNKEEPTTEDVYSVGVIANIIQMLNLPDGTVKVLVEGQQRAKIEHIHDDENGFWAGVQPLISEYEDENDELKTIARAALNEFEGYVKNNKKIPAEILPKLQKISLEDRLADTMASNLIASVQKKQALLEETNLIARFEALLVAMATELDSLETETRIRNRVKQQMEKNQRDYYLNEQIKAIQKELGNGEDAEQTELDKLKEQIKEAKLPLEVKEKLDSEFKKLKAMPQSSSEATVVRGYIDWVLKMPWNKKSTVKKDLAKAQEILDKDHYGLERVKERIVEYLAVQSRLNKLKGPILCLVGPPGVGKTSLGQSIANATGRKYVRMALGGVRDEAEIRGHRRTYIGSMPGSLMM…	0	857	2213	782	55.12	431	348	571	3	3	73.02	44562	1	7IV6IVVM9VIRQ2DREA2ND1HN1KQILIF4MQNDSP1DK1NE1ITATSESD2RSIV1TV1VADN1VI1IM1RN7IV4SQVQ2RK1VEEHYIIHEDRD1DNFGLFEW1IGTV1VP1PIDSPETY2PEVN-D2EKATLISA1SAVAILAN2SENG1IV1LN4SPPA1VIILGPIKTLSQQK1ESGLFESDKR3VTIM1AS2SIIAKS1AQEKRK1KAIL2AEVTSNVLKIEA1LF1MA3FA1EAST1ILSDVS1QEVT1KT3SN3RQ4TN2ED3HN2MI7DG3EDGA-ERQDT1ILSDDKFLEKAERQ1SKKEIARK1SPKL1AVRK2ALLD2LFQK2RKQA1NPPQLS1AS1SAST3NG1LI2LV1GKVM2DN3KTTV2ND1DAFK1IQRE3QK2FY3…	N/A	N/A	N/A	N/A	N/A	N/A	N/A	N/A	95	95
CLIBASIA_00780	0	CLIBASIA_00780	Q8PBY5#PHI:9833#ClpX#339#Xanthomonas_campestris#reduced_virulence	Q8PBY5#PHI:9833#ClpX#339#Xanthomonas_campestris#reduced_virulence	0	0	Q8PBY5#PHI:9833#ClpX#339#Xanthomonas_campestris#reduced_virulence	Q8PBY5#PHI:9833#ClpX#339#Xanthomonas_campestris#reduced_virulence	11	412	12	415	SKNALYCSFCGKSQHEVRKLIAGPTVFICDECVELCMDIIREENKSSITKSHEGIPNPQEILRVLDEYVIGQGQAKKVLAVAVHNHYKRLAHSSKSSNVELAKSNILLVGPTGCGKTYLAQTLARIIDVPFTMADATTLTEAGYVGEDVENIILKLLQAADYNVERAQRGIVYIDEVDKISRKSDNPSITRDVSGEGVQQALLKIMEGTIASVPPQGGRKHPQQEFLQVDTTNILFICGGAFAGLDRIISARGEKA-SIGFSAVVKDSDNR-PVGEVLRNLESEDLVKFGLIPEFIGRLPVLATLEDLDENSLIRILSEPKNALIKQYQCLFDMEDVELVFHEDALREIARCAIAHKTGARGLRSILEKILLDTMFELPMLKGVSSVIISDDVVKGKAC…	SNKILYCSFCGKSQHEVRKLIAGPSVFICDECVELCNDIIREELEEKAQSARSSLPKPREILEVLDQYVIGQLRAKRTLAVAVYNHYKRIESRSKNDEVELAKSNILLVGPTGSGKTLLAETLARLLNVPFTIADATTLTEAGYVGEDVENIIQKLLQKCDYDVEKAQQGIVYIDEIDKISRKSENPSITRDVSGEGVQQALLKLIEGTVASVPPQGGRKHPQQEFLQVDTKNILFICGGAFAGLDKVIQARSNDAGGIGFGAKVKSSERKQEVGKILAEVEPEDLIKFGLIPEFVGRLPVVATLEELDEPALIKILTEPKNAITKQFKKLFEMESVELEFRPDALSAIAKKALKRKTGARGLRTIVESVLLDTMYELPSQENVSKVVVDESVIEHKSE…	0	581	1498	404	69.8	282	120	338	2	2	83.66	44562	1	1KNNKAI20TS11MN6NLKESESKIATQKSSAHRESGSIL1NK1QR3RE3EQ5GLQR2KRVT5HY5LIAEHSSR2SNSDNE15CS3YL2QE4ILILDN4MI20LQ4AKAC2ND2RK2RQ7VI7DE19ILMI3IV21TK14RKIV1SQ2GSENKD1-GSG3SG1VK2DS1DENRRK-QPE2EKVI1RANELV1SP3VI8IV5LV4DE3NPSA2RK2ST5LIIT2YFQKCK2DE2DS3VE1HREP3RSEA2RKCK1ILAKHR8ST1LV1KSIV5FY3MSLQKEGN2SK1IVIVSDDEDS1VIKEGH1ASCE1LYNLVI1	N/A	N/A	N/A	N/A	N/A	N/A	N/A	N/A	95	95
CLIBASIA_01060	0	CLIBASIA_01060	A0A059ZR97#PHI:5240#SecA#470#Acinetobacter_baumannii#reduced_virulence	A0A059ZR97#PHI:5240#SecA#470#Acinetobacter_baumannii#reduced_virulence	0	0	A0A059ZR97#PHI:5240#SecA#470#Acinetobacter_baumannii#reduced_virulence	A0A059ZR97#PHI:5240#SecA#470#Acinetobacter_baumannii#reduced_virulence	5	887	2	905	LAKLASKLLIPSNERRLRPYYAKVIAINELEKEISHLSDDSLANKTSEFKERINNGETLDDLLVPAFAVVREVARRTLGMRPFDVQLLGGMILHKGCVAEMKTGEGKTLAAVLPVYLNALSGKGVHVVTVNDYLARRDSNTMSAIYKFLGLSTGVVFHDLSDDKRRAAYACDITYITNNELGFDYLRDNMQYRRVDMVQRGHNFAIVDEVDSIFIDEARTPLIISGPVEDHSDLYRTIDSIIIQLHPSDYE---------IDEKQRTVHFSEKGTERIEELLHGENLLKSG-GLYSFENVAIVHLINNALKSHTLFLRNRDYIVNRDEVVIIDEFTGRMMPGRRYSDGQHQALEAKERVKIQPENQTLSSITFQNYFLKYRKLSGMTGTASTEAEELAN…	LASLIGGIFGTKNERELKRMRKIVEQINALEPTISALSDADLSAKTPEFKQRYNNGESLDKLLPEAFAVCREAAKRVMGMRHYDVQLIGGITLHEGKIAEMRTGEGKTLMGTLACYLNALSGEGVHVITVNDYLAQRDAELNRPLFEFLGLSIGTIYSMQEPAEKAAAYLADITYGTNNEFGFDYLRDNMVFSLAEKKQRGLHYAIIDEVDSILIDEARTPLIISGQSEDSSHLYTAINTIPPKLRPQKEEKVADGGHFWIDEKQRSVEMTEIGYETVEQELIQMGLLAEGESLYSATNLNLVHHVSAAIRAHFLFQRDVHYIIHDGEVVIVDEHTGRTMPGRRWSEGLHQAVEAKEGLAIQPENQTLATTTFQNYFRLYKKLSGMTGTADTEAAEMKE…	0	821	2120	911	49.62	452	424	593	13	35	65.09	44562	1	2KS1AISGKGLILFIGPTSK3RE1RKPRYMYRAKKI1IEAQ2EA2KPET2HA3DASD1ASNA2SP3EQ1IY4TS2DK2VPPE4VC2VA1RK1TVLM3PHFY4LI2MIIT2KE1CKVI3KR7AMAGVT1PAVC7KE4VI7RQ2SANETLMNSRAPILYFKE5TI1VTVIFYHSDMLQSEDPDAKERKRA3ALCA4IG4LF9QVYFRSRLVADEMKVK3HLNHFY2VI6FL12PQVS2HS1DH2RTTA1DNST1IPIPQK1HR1SQDKYE1-K-V-A-D-G-G-H-F-W6TS1HEFMST1KI1TY1RTIV1EQLE1HIGQEMNG2KASE1-EGS3FAET1VLANIL2LHIVNSNA1LIKRSA1TF2LQ1NDRVDH2VINHRDDG4IV2FH3MT5YW1DE1Q…	N/A	N/A	N/A	N/A	N/A	N/A	N/A	N/A	99	99
CLIBASIA_01635	0	CLIBASIA_01635	Q2YRY5#PHI:6684__PHI:9762#Pyk__PykM_(BAB1_1761)#235__29459#Brucella_abortus__Brucella_melitensis#reduced_virulence	Q2YRY5#PHI:6684__PHI:9762#Pyk__PykM_(BAB1_1761)#235__29459#Brucella_abortus__Brucella_melitensis#reduced_virulence	0	0	Q2YRY5#PHI:6684__PHI:9762#Pyk__PykM_(BAB1_1761)#235__29459#Brucella_abortus__Brucella_melitensis#reduced_virulence	Q2YRY5#PHI:6684__PHI:9762#Pyk__PykM_(BAB1_1761)#235__29459#Brucella_abortus__Brucella_melitensis#reduced_virulence	5	480	5	478	RRIKIISTLGPSSFSEDVINRLHEEGTDVFRINMSHTSHDKMCELIKKIRAVELRSRRPIGILIDLQGPKFRVGKFANSKVDLTEGQIFTLDNKDSLGSSDRVMLPHPEIFASIKIGDRLLIDDGRVKLCVQEKGIGFIKCKVIAGISIADRKGISFPDTFLTTQALTQKDREDLHAALQTCEVDWVALSFIQSADDLLEIRKIISQNKIGLMSKIEKPRAIEYASEIIQLSDAVMVARGDLGVEMALELIPGIQKKLIRIARQLGKPVVIATQMLESMVTSPFPTRAEVSDVATAVFEEADAIMLSAETASGSYPVDAVRTMSLVASSAERDSSWLEMRSLRRIEPNETGADVISSAARQIAETLRLSAIFCYTASGATGLRAARERPKLEIIALSPM…	RKVKILATLGPASGEEAVIRKLFEAGADVFRINMSHADHDLMRTLVKRIRNVEKELGRPIGILADLQGPKLRVGKFKDGKVDLVPGQTFTLDNNEALGDETRVFLPHPEILEAVEPGHRLLIDDGKLHLVAEACDGKSIRCKVVSGTRISDRKGVSLPDTTLGVGALTEKDRCDLDAVLKE-EIDWVALSFIQRPEDLAEVRKV-SRGKVGLMSKIEKPQAVTRLYEIIELSDALMVARGDLGVEVPLENVPGIQKQITRKARRAGKPVVVATQMLESMITAPVPTRAEVSDVATAVFEGADAIMLSAESASGQYPVEAVATMNRIAEQVEREPTYSTIIDAQRAMPEPTGADAISLAARQIAETLKLSAIVTYTASGTTGLRAARERPRTPIIALSPV…	0	615	1585	476	64.29	306	168	372	2	2	78.15	44562	1	1RKIV2ILSA4SA1FGSE1DA2NRRK1HF1EA1TA9TASD2KL1CRET1IV1KR2AN2LKRESLRG6IA6FL5AKNDSG4TVEP2IT5KNDESA2SDSEDT2MF6FLAESAIVKEIP1DH7RKVLKH1CVVAQEEAKCGDIGGKFS1KR3IVAS1ITSR1AS4IV1FL3FT1TGTVQG3QE3EC2HD1AV1QKTEC-1VI9SRAPDE2LA1IV2IVI-1QRNG1IV9RQ1IVETYRALSY3QE4VL10MVAP2LNIV5KQLIIT1IK2QRLA5IV8VI1SA1FV15EG9TS3SQ3DE2RA2SNLRVI1SESQAV2DESPSTWYLSETMIRISDLARQ1IAEM1NEEP4VA2SL9RK4FVCT5AT10KRLTEP6MVIVQD3RK1AS4IL5ED2SH1SLDE…	N/A	N/A	N/A	N/A	N/A	N/A	N/A	N/A	99	99
CLIBASIA_01765	0	CLIBASIA_01765	Q8YFR7#PHI:3645__PHI:7184#BpdA#29459#Brucella_melitensis#loss_of_pathogenicity__reduced_virulence	Q8YFR7#PHI:3645__PHI:7184#BpdA#29459#Brucella_melitensis#loss_of_pathogenicity__reduced_virulence	0	0	Q8YFR7#PHI:3645__PHI:7184#BpdA#29459#Brucella_melitensis#loss_of_pathogenicity__reduced_virulence	Q8YFR7#PHI:3645__PHI:7184#BpdA#29459#Brucella_melitensis#loss_of_pathogenicity__reduced_virulence	15	957	15	960	FLILVLFLLWMVSPSFAIEPINISSSDRVLDLTSITRIYVNQGEDFQVFTAADIDGISRRIEV-SASSIRHRGDWAVFALANTSDSQLERLIVVPHYRLVGSHFFSPDLGSRRIISVTPSEGFSLDRIPNSDSDVFRITINPGAVVTFIMEISTPNLPQIYLWEPNFYKDTVNSFTLYRGIIIGVASLLAIFLTIFYMVNRSSMLIPTFAMAWVVLGYISIDFGFLSKLVNLPSGELLIWRACSEIALSSSLIIFLFMYLHWNRWHAKVGYITFSGIACIAILFCMSFYYPMVTASIARITLASIVLYYTYFIIYHGMKGYERAVLLIPAWILIFIWFIGLWMAITKRLDNDIIQPALVGGLVLIVILIGFTVIQHVLATGYFSQGIFSDGERQSLAVL…	FFALFVFLTLSAVHASAIEPIKISKEDTALDLSRAVELLRNKGESVQVSTMPGPDGIVRRIEVQSDQNANASGDWAAFSIANPTDEQIDRLIVAPHFRLVGSGVIWPDLGSPRIASITPSEGFALDRQPSADADVFRITLNPGSVITFVAELSSHNLPQLYLWEPEAYKDMVNSYTLYRGILLGISGLLALFLTILFVVKGTSLFPATAALAWAVLAYICVDFGFWNKLMQITPGNEQIWRAGTEVALAASLVIFLFTYLNLNRWHDHFSYGAVTWILGLLALAGVAVFDPPVASGIARISLALTVFSGVAIIGYLAVKGYDRAVMLIPAWLLTLIWLIGAWMAVSGHLDNDIVQSALGGGLVLIVLLIGFTVMQHAFAGGGLQQGLLSDMERQALAVI…	0	941	2432	947	47.31	448	494	653	3	5	68.95	44562	1	1LFIA1VFLV2LTWLMSVASVPHSAFS5NK2SKSE1RTVA3TSSRIATVREILYLVR1QK2DSFV2FS1AMAPDGIP3SV5-Q1ADSQSNIARNHARS4VA1ASLI2TPST1SE1LIED4VA2YF5HGFVFISW5RP2IA1VI6SA3IQ1NSSA1SA6IL3AS1VI2IVMA1IL1TSPH4IL5NEFA3TM3FY6ILIL1VIASSG3IL4FLYFMV1NKRGST1MLLFIPPA1FA1ML2VA2GA2SCIV4LWSN2VMNQLIPTSP1ENLELQ4CGST1IV2SASA2IV4MT2HNWL4ADKHVFGS1IGTAFVSTGW1ALCGILALIA1FACGMVSAFVYFYD1MP1TAASSG4TS2SLIT1LFYSYGTVYAFI1IG1HLGAMV3ED3LM5IL1ITFL2FL…	N/A	N/A	N/A	N/A	N/A	N/A	N/A	N/A	98	98
CLIBASIA_01790	0	CLIBASIA_01790	A6QFR9#PHI:4038#QoxB#1280#Staphylococcus_aureus#reduced_virulence	A6QFR9#PHI:4038#QoxB#1280#Staphylococcus_aureus#reduced_virulence	0	0	A6QFR9#PHI:4038#QoxB#1280#Staphylococcus_aureus#reduced_virulence	A6QFR9#PHI:4038#QoxB#1280#Staphylococcus_aureus#reduced_virulence	31	669	25	656	FFVVALVGVSIIFAITYYRLWGYLWKEWFTSVDHKKIGIMYIILSLVMLFRGFADAIMMRLQQAIASGGGEGYLDAHHYDQIFTAHGVIMIFFVAMPMITGIMNFVVPLQIGARDVSFPFLNNFSFWMTVAGAVVIMCSLFIGEFASVGWLAYPPLSGISYSPGVGVDYYIWGLQIAGIGTTLSGINLVVTIIKMRCPGMTMMKMPVFVWTAFCSNIMIIAAFPILTATLFLLTLDRYIGTNFFTNHLGGNPMMYINLIWIWGHPEVYILVLPAFGIFSEVVATFSGKRLFGYNSMVYATLAITILSYTVWLHHFFTMGSGANVNAFFGIMTMVIAVPTGAKIFNWLFTMRLGKVRFEVPMMWTLGFMITFLIGGMTGVLLAVPPADFTLHNSLFLVAH…	FLVIGLIAV-----ITYFKLWKYLYKEWFTSVDHKKIGIMYLICAVLMFVRGGIDALLIRAQLTVPD---NKFLESNHYNEIFSTHGVIMIIFMAMPFIFGLWNIVVPLQIGARDVAFPVLNNVSFWLFFAGMILFNLSFIIGGSPAAGWTNYAPLAG-EFSPGPGVNYYLIAIQISGLGTLATGINFFVTILRCKTPTMKFMQMPMFTVTTFITTLIVILAFPPLTVALALMTTDRIFDTAFFTVAHGGMPMLWANFFWVWGHPEVYIVILPAFGIYSEIIPTFARKRLFGHQSMVWATAGIAFLSFLVWVHHFFTMGNGALINSFFSISTMLIGIPTGVKLFNWLLTLYKGRITFESPMLFSLAFIPNFLLGGVTGVMLAMASADYQYHNTYFLVAH…	0	571	1471	644	46.27	298	329	423	9	17	65.68	44562	1	1FL1VIAG1VIGA1S-I-I-F-A-3YFRK2GK2WY16IL1LCSALVVL1LFFV2FGAI2ILMLMI1LA1QLATIVAPSDG-G-G-ENGKYF1DEASHN2DNQE2TSAT6FI1VM3MF1TF1ILMW1FI11SA2FV3FV3MLTFVF2AMVIVLIFMNCL1LFFI2EGFSAPSAVA2LTAN1PA2SA1I-SEYF3VP2DN2ILWIGALI2AS1IL2TLLAST3LFVF3ILKRMCRKCT1GT1TKMF1KQ2VM1VTWV1AT1CISTNTILMIIV1AL3IP2AVTA1FA1LM1LT2YIIFGD1NA3NVHALH2NM2MLYWIA1LFIF1IV8LVVI6FY2VIVIAP2SAGR5YHNQ3YW2LAAG1TAIF2YFTL2LV7SN2NLVI1AS2GS1MS2VL1AGVI3A…	N/A	N/A	N/A	N/A	N/A	N/A	N/A	N/A	95	95
CLIBASIA_02520	0	CLIBASIA_02520	Q2FWE8#PHI:10773#AtpA#1280#Staphylococcus_aureus#reduced_virulence	Q2FWE8#PHI:10773#AtpA#1280#Staphylococcus_aureus#reduced_virulence	0	0	Q2FWE8#PHI:10773#AtpA#1280#Staphylococcus_aureus#reduced_virulence	Q2FWE8#PHI:10773#AtpA#1280#Staphylococcus_aureus#reduced_virulence	1	502	1	495	MDIHAAEISDILRKRIKDFGNDSEFSEIGRVLSIGDGIARVYGLNNIRAGEMVQFSHGVYGMALNLEVDNVGVVILGSYKEISEGDIVKRTGRIVDVPVGLELLGRVVDALGNPIDGKGPIKCEQRSCTEADAPGIIQRQSVCEPLSTGIKAIDSLIPIGRGQRELIIGDRKTGKTSIILDTFLNQKSSHDKGSEKDKVYCIYVAIGQKRSSVARFVKALEDRGALSYSIVVVASASDPAPMQLLAPFAGCAMGEYFRDNGYHALIAYDDLQKHAVAYRQLSLLLRRPPGREAYPGDVFYLHSRLLERAAKMSDALGAGSLTALPVIETQVNDVSAYIPTNVISITDGQIFLETELFYQGIRPAINIGLSVSRVGSAAQVKAMKQVSGAVKGELAQYRE…	MAIKAEEISALLRSQIENYESEMSVTDVGTVLQIGDGIALIHGLNDVMAGELVEFHNGVLGLAQNLEESNVGVVILGPYTGITEGDEVKRTGRIMEVPVGEELIGRVVNPLGQPIDGQGPINTTKTRPVEKKATGVMDRKSVDEPLQTGIKAIDALVPIGRGQRELIIGDRQTGKTTIAIDTILNQK---DQGT-----ICIYVAIGQKDSTVRANVEKLRQAGALDYTIVVAASASEPSPLLYIAPYSGVTMGEEFMFNGKHVLIVYDDLTKQAAAYRELSLLLRRPPGREAYPGDVFYLHSRLLERAAKLNDDLGGGSITALPIIETQAGDISAYVPTNVISITDGQIFLQSDLFFSGVRPAINAGQSVSRVGGSAQIKAMKKVAGTLRLDLASYRE…	0	580	1496	503	57.85	291	203	375	3	9	74.55	44562	1	1DA1HK1AE3DAIL2KSRQ1KEDNFYGENSDESMESFVSTEDIV1RT2SQ6RLVIYH3NDIVRM3ML1QE1SHHN2YL1ML1LQ3VEDS8SP1KTEG1ST3IE7VMDE4LE2LI4DNAP2NQ4KQ3KNCTETQKRTSRCPTV1AKDK1PT1IVIMQD1QK2CD3SQ7SA1IV14KQ4ST1IALI2FI4S-S-H-1KQ1STE-K-D-K-V-YI9RD1ST1ARRAFN1KEAK1ERDQRA3SD1ST3VA4DE1AS1MLQLLYLI2FYAS1CVAT3YE1RMDF2YK1AV2AV4QT1HQ1VA3QE31MLSN1AD2AG2LI4VI4VANG1VI3IV14EQTSED2YFQS1IV5IA1LQ6SGAS2VI4QK1SA1ATVLKRGLED2QS3MLSE2SAKQ1SG4SESF1Q…	N/A	N/A	N/A	N/A	N/A	N/A	N/A	N/A	99	99
CLIBASIA_03375	0	CLIBASIA_03375	Q9HV59#PHI:6080#Pnp#287#Pseudomonas_aeruginosa#reduced_virulence	Q9HV59#PHI:6080#Pnp#287#Pseudomonas_aeruginosa#reduced_virulence	0	0	Q9HV59#PHI:6080#Pnp#287#Pseudomonas_aeruginosa#reduced_virulence	Q9HV59#PHI:6080#Pnp#287#Pseudomonas_aeruginosa#reduced_virulence	6	688	5	691	TVEIEWAGRPLKLETGRIARQSDGAVLATYGETVVLATVVYDRSLKDGQDFFPLTVNYQERTYAVGKIPGGYLRRESRPTENEILISRMIDRSIRPLFSKCYKNETQVIINVMQHDLESSPHVVSMVAASAALMLSGLPFEGPVVGAQVDY-INGQYVLNPRLDEDQGS-LDLFVSGTQDAVLMVELEANQLSEDVVLDAIIFGHNECKPVIEAISKLA----------KMCAKEPIVIDSKDFSKLEEEMSQMIKEDLRVSCFIPEKYVRCKQIDDLKKKMVSYFSSEH-SSWNEGEIVSVFEDIQAKVVRTVMLDKKVRMDGRDSETVRDISAQVGLLQRTHGSSLFIRGDTQAIVVVTLGTREDEQYVDSLSGTQRNDFMMHYNFLPCATGEVSRM…	TKQFQFGQSTVTLETGRIARQATGAVLVTMDDVSVLVTVVGAKSPAEGRDFFPLSVHYQEKTYAAGRIPGGFFKREGRPSEKETLTSRLIDRPIRPLFPEGFMNEVQVVCTVVSTNKKSDPDIAAMIGTSAALAISGIPFAGPIGAARVGFHPEIGYILNPTYEQLQSSSLDMVVAGTEDAVLMVESEADELTEDQMLGAVLFAHDEFQAVIRAVKELAAEAGKPAWDWKAPAENTVLVNA-----IKAELGEAISQAYTITI----KQDRYNRLGELRDQAVALFAGEEEGKFPASEVKDVFGLLEYRTVRENIVNGKPRIDGRDTRTVRPLRIEVGVLGKTHGSALFTRGETQALVVATLGTARDAQLLDTLEGERKDAFMLHYNFPPFSVGECGRM…	0	679	1752	696	49.28	343	331	490	6	22	70.4	44562	1	1VKEQIFEQWFAGGQRSPTLVKT9SADT4AV1YMGDEDTVVS2AV3YGDARK1LPKADE1QR5TS1NH3RK3VA1KR4YFLFRK2SG2TS1NK1IT1IT2ML3SP5SPKECGYFKM2TV2IVICNT1MVQSHTDNLKEK1SD1HDVIVASA1VIAGAT4MALI2LI2EA2VIVGGA1QR1DGYF-HIPNEGIQG1VI3RTLYDEEQDL1GS1-S2LMFV1SA2QE7LS2NDQE1ST2VQVM1DG1IVIL1GA1ND1CFKQPA2ER1IVSKKE2-A-E-A-G-K-P-A-W-D-W1MACP1KEENPTIVVLIVDNSAK-D-F-S-K-LIEKEA1MLSGQEMA1KSEQDALYRTVISTCIF-I-P-E-1YQVD1CYKNQRILDGDE1KRKDKQMA1SAYL1S…	N/A	N/A	N/A	N/A	N/A	N/A	N/A	N/A	98	98
CLIBASIA_03375	0	CLIBASIA_03375	Q8ZLT3#PHI:3878#Pnp#28901#Salmonella_enterica#reduced_virulence	Q8ZLT3#PHI:3878#Pnp#28901#Salmonella_enterica#reduced_virulence	0	0	Q8ZLT3#PHI:3878#Pnp#28901#Salmonella_enterica#reduced_virulence	Q8ZLT3#PHI:3878#Pnp#28901#Salmonella_enterica#reduced_virulence	8	688	8	690	EIEWAGRPLKLETGRIARQSDGAVLATYGETVVLATVVYDRSLKDGQDFFPLTVNYQERTYAVGKIPGGYLRRESRPTENEILISRMIDRSIRPLFSKCYKNETQVIINVMQHDLESSPHVVSMVAASAALMLSGLPFEGPVVGAQVDYINGQYVLNPRLDE-DQGSLDLFVSGTQDAVLMVELEANQLSEDVVLDAIIFGHNECKPVIEAISKLAKMCAK-----EPIVIDSKDFSKLEEEMSQMIKEDLRVSCFIPEKYVRCKQIDDLKKKMVSYFSSEHSSWNEGEIVSVFEDIQAKVVRTVMLDKKVRMDGRDSETVRDISAQVGLLQRTHGSSLFIRGDTQAIVVVTLGTREDEQYVDSLSGTQRNDFMMHYNFLPCATGEVSRMGAPSRREIG…	KFQYGQHTVTLETGMMARQATAAVMVSMDDTAVFVTVVGQKKAKPGQDFFPLTVNYQERTYAAGRIPGSFFRREGRPSEGETLIARLIDRPVRPLFPEGFVNEVQVIATVVSVNPQVNPDIVAMIGASAALSLSGIPFNGPIGAARVGYINDQYVLNPTQDELKESKLDLVVAGTEAAVLMVESEAELLSEDTMLGAVVFGHEQQQVVIQAINDLVKEAGKPRWDWQPEAVNDA----LNARVAALAESRLSDAYRITDKQERYAQVDVIKSETIEQLIAEDETLDANELGEILHAIEKNVVRSRVLAGEPRIDGREKDMIRGLDVRTGVLPRTHGSALFTRGETQALVTATLGTARDAQVLDELMGERTDSFLFHYNFPPYSVGETGMVGSPKRREIG…	0	672	1733	687	48.91	336	341	471	3	10	68.56	44562	1	EKIFEQWYAGGQRHPTLVKT4RMIM3SADTGA2LMAVTSYMGDED1VA1LFAV3YGDQRKSKLA1DP17VA1KR3GSYFLF3SG2TS1NG1IT2SA1ML3SPIV4SPKECGYFKV2TV3IANT1MVQSHVDNLPEQSVSN1HDVI1SA1VIAG5MS3LI2EN2VIVGGA1QR1DG3GD6RTLQ2-LDKQEGSSK3FV1SA2QEDA6LS2NEQL4VTVM1DG1IVIV3NEEQCQKQPV2EQ2SNKD1AV1MECAAG1-P-R-W-D-WEQ1IEVAIVDNSDKAD-F-S-K-1ENEAERMVSAQAMLIAKEESDR1RSVDSACYFR1PTED1YQVE1CYKA1IV1DVLI1KSKEMTVISEYQFLSISA1HDSESTWLNDEAGN1ILVGSEVIFLEHDA1QEA…	N/A	N/A	N/A	N/A	N/A	N/A	N/A	N/A	97	97
CLIBASIA_03375	0	CLIBASIA_03375	A1KT19#PHI:6863#Pnp#487#Neisseria_meningitidis#reduced_virulence	A1KT19#PHI:6863#Pnp#487#Neisseria_meningitidis#reduced_virulence	0	0	A1KT19#PHI:6863#Pnp#487#Neisseria_meningitidis#reduced_virulence	A1KT19#PHI:6863#Pnp#487#Neisseria_meningitidis#reduced_virulence	1	690	1	694	MFDVHTVEIEWAGRPLKLETGRIARQSDGAVLATYGETVVLATVVYDRSLKDGQDFFPLTVNYQERTYAVGKIPGGYLRRESRPTENEILISRMIDRSIRPLFSKCYKNETQVIINVMQHDLESSPHVVSMVAASAALMLSGLPFEGPVVGAQVDYINGQYVLNPRLDE-DQGSLDLFVSGTQDAVLMVELEANQLSEDVVLDAIIFGHNECKPVIEAISKLAKMCAKEPIVIDSKDFSKLEEEMSQ---MIKEDLRVSCFIPEKYVRCKQIDDLKKKMV-SYFSSEHSSWNEGEIVSVFEDIQAKVVRTVMLDKKVRMDGRDSETVRDISAQVGLLQRTHGSSLFIRGDTQAIVVVTLGTREDEQYVDSLSGTQRNDFMMHYNFLPCATGEVSRMGAP…	MFNKHVKTFQYGNQTVTLETGEIARQAAAAVKVSMGDTVVLVAVTTNKEVKEGQDFFPLTVDYLERTYAAGKIPGGFFKREGKQSEKEILTSRLIDRPIRPLFPEGFYHDIQIVAMVVSVDPEIDSDIPAMLGASAALVLSGVPFAGPIGAARVGYVNGVYVLNPTKAELAKSQLDLVVAGTSKAVLMVESEAKILPEDVMLGAVVYGHDQMQVAINAINEFADEV--NPELWDWKAPETNEELVAKVRGIAGETIKEAFKIRQKQARSAKLDEAWNAVKEALITEETDTLAANEIKGIFKHLEADVVRSQILDGQPRIDGRDTRTVRPLNIQTSVLPRTHGSALFTRGETQALAVATLGTSRDEQIIDALSGEYTDRFMLHYNFPPYSTGEVGRMGAP…	0	656	1692	697	48.64	339	348	475	6	10	68.15	44562	1	2DNVK1TVVKETIFEQWYAGGNRQPTLVKT4RE4SADAGA2LKAVTSYM1ED4AVTA1VTYTDNRKSELV1DE9ND1QL5VA6YFLFRK2SGRKPQTS1NK3IT2ML3SP5SPKECGYFKYNHEDTI1VIIVIANM1MVQSHV1LP1SISDPSHDVIVPSA1VLAG5MV3LV2EA2VIVGGA1QR1DG1IV2QV5RTLKDA1-LDAQKGSSQ3FV1SA2QSDK6LS2NKQI1SP3VM1DG1IVIVFY2NDEQCMKQPVVA1EN2SNKELF1KDMECVA-K-EN1IEVLIW1SW1DAFPSEKTLN2ELMVSAQK-V-R-GMIIAKG1DTLIRKVESACFFK1PREQ1YQVA1CSKAQKIL1DELAKWKNKAMVVK-ESAYLFISTSE1HTSDSTWLNAEA…	N/A	N/A	N/A	N/A	N/A	N/A	N/A	N/A	99	99
CLIBASIA_03720	0	CLIBASIA_03720	P42375#PHI:3085#GroEL#837#Porphyromonas_gingivalis#increased_virulence_(hypervirulence)	P42375#PHI:3085#GroEL#837#Porphyromonas_gingivalis#increased_virulence_(hypervirulence)	0	0	P42375#PHI:3085#GroEL#837#Porphyromonas_gingivalis#increased_virulence_(hypervirulence)	P42375#PHI:3085#GroEL#837#Porphyromonas_gingivalis#increased_virulence_(hypervirulence)	3	527	2	527	AKDIKLGTAARDAIAYGVNTLAEAVKCTLGPKGRCVIIGNSFGAPRVTKDGVTVAKSISFKNHFHEVGARMIRDVATNTEDSSGDGTTTATCLAQAIYNEGRKYVTAGLNPMDIKRGIDLAVQEVVEYLKANHKKVGSR-EEIIQVATISANGDREIGEKIAYAMEQIGPHGIITIDQAKTATTEVRVVQGMQIDRGYISPYFVTSTERMTAEVENPYILIYDKKISALQPLLPILESATQSGRPLCIIAEDVEGDALATLVVNRVRCGLPVLAVKAPAFGDRRKEVLRDIAAVVGATVISEEIGLKLEKATIADLGSAKKVVMSKDDTTIVGGNGPSERIEGRINEIQKAIEDTKSDYDRDKLKERLAKLAGGVAVLEVGDVTEAALGEKKDRYQDSL…	AKEIKFDMESRDLLKKGVDALANAVKVTLGPKGRNVILSKTYGAPHITKDGVSVAKEIELECPFENMGAQLVKEVASKTNDDAGDGTTTATILAQSIIGVGLKNVTAGANPMDLKRGIDKAVKAVVTHIAGMAKEVGDDFQKIEHVAKISANGDENIGSLIAEAMRKVKKEGVITVEEAKGTDTTVEVVEGMQFDRGYISPYFVTNTDKMEVQMENPFILIYDKKISVLKEMLPILEQTVQTGKPLLIIAEDIDSEALATLVVNRLRGSLKICAVKAPGFGDRRKAMLEDIAILTGGTVISEETGLKLENATMDMLGTAEKVTVDKDNTTIVNGAGNKEGIASRITQIKAQIENTTSDYDREKLQERLAKLAGGVAVLYVGAASEVEMKEKKDRVEDAL…	0	583	1503	527	56.74	299	225	388	3	3	73.62	44562	1	2DE2LFGDTMAEAS2ALILAKYK2NDTA2EN3CV7CN2ILGSNKSTFY3RHVI5TS3SE1SEFLKENCHP1HEENVM2RQMLIVRKDE2TSNK1EN1SDSA8CI3AS1YINGEV1RL1YN4LA4IL5LK2QKEA2ETYHLIKAAGNMHA1KE2SDRD-FEQEK1IEQH2TK6REEN2ESKL2YE2ERQKIVGKPKHE1IV2IVDEQE2TGATTD1ET1RE2QE3IF11SN1EDRK1TEAVEQVM3YF9AV1QKPELM5SQATTV1ST1RK2CL5VIEDGSDE9VL1CGGS1PKVILC5AG6EAVM1RE3AIVLVT1AG6IT5KN2IMADDM2ST1KE2VTMVSD2DN4GN1NA1PNSK1RG1EAGS2NTEQ1QKKAAQ2DN1KT5DE2KQ13EY2DAVA…	N/A	N/A	N/A	N/A	N/A	N/A	N/A	N/A	95	95
CLIBASIA_03720	0	CLIBASIA_03720	P42383#PHI:10299#HpHSP60#210#Helicobacter_pylori#unaffected_pathogenicity	P42383#PHI:10299#HpHSP60#210#Helicobacter_pylori#unaffected_pathogenicity	0	0	P42383#PHI:10299#HpHSP60#210#Helicobacter_pylori#unaffected_pathogenicity	P42383#PHI:10299#HpHSP60#210#Helicobacter_pylori#unaffected_pathogenicity	3	535	2	531	AKDIKLGTAARDAIAYGVNTLAEAVKCTLGPKGRCVIIGNSFGAPRVTKDGVTVAKSISFKNHFHEVGARMIRDVATNTEDSSGDGTTTATCLAQAIYNEGRKYVTAGLNPMDIKRGIDLAVQEVVEYLKANHKKVGSREEIIQVATISANGDREIGEKIAYAMEQIGPHGIITIDQAKTATTEVRVVQGMQIDRGYISPYFVTSTERMTAEVENPYILIYDKKISALQPLLPILESATQSGRPLCIIAEDVEGDALATLVVNRVRCGLPVLAVKAPAFGDRRKEVLRDIAAVVGATVISEEIGLKLEKATIADLGSAKKVVMSKDDTTIVGGNGPSERIEGRINEIQKAIEDTKSDYDRDKLKERLAKLAGGVAVLEVGDVTEAALGEKKDRYQDSLD…	AKEIKFSDSARNLLFEGVRQLHDAVKVTMGPRGRNVLIQKSYGAPSITKDGVSVAKEIELSCPVANMGAQLVKEVASKTADAAGDGTTTATVLAYSIFKEGLRNITAGANPIEVKRGMDKAAEAIINELKKASKKVGGKEEITQVATISANSDHNIGKLIADAMEKVGKDGVITVEEAKGIEDELDVVEGMQFDRGYLSPYFVTNAEKMTAQLDNAYILLTDKKISSMKDILPLLEKTMKEGKPLLIIAEDIEGEALTTLVVNKLRGVLNIAAVKAPGFGDRRKEMLKDIAILTGGQVISEELGLSLENAEVEFLGKAGRIVIDKDNTTIVDGKGHSHDVKDRVAQIKTQIASTTSDYDKEKLQERLAKLSGGVAVIKVGAASEVEMKEKKDRVDDALS…	0	540	1391	533	51.59	275	255	389	3	3	72.98	44562	1	2DE2LFGSTDAS2DNALILAFYE2NRTQ1AHED3CV1LM2KR2CN1IL1GQNK1FY3RSVI5TS3SE1SEFLKSNCHPFVHAENVM2RQMLIVRKDE2TSNK1EA1SASA8CV2QYAS1YFNK2RLKRYNVI3LA2MIDEIV3IM1LK1VAQEEAVIVIENYE2AKNAHS4SGRK3IT8GS1RHEN2EKKL2YD3QKIV1PKHD1IV2IVDEQE2TGAITETD1VLRD2QE3IF4IL6SNTA1RK3EQVLED1PA3ILYT5ASLMQKPDLI2IL2SKATTMQKSE1RK2CL5VI2DE2AT5RKVL1CGGV1PNVILA5AG7VM1RK3AIVLVT1AGTQ5IL2KS2KN1TEIVAEDF2SK1KGKRVI1MISD2DN4GD1NK1PH1EHRDIVEKGD1IVNA…	N/A	N/A	N/A	N/A	N/A	N/A	N/A	N/A	97	97
CLIBASIA_03750	0	CLIBASIA_03750	I1RA52#PHI:445#NOS1#5518#Fusarium_graminearum#reduced_virulence	I1RA52#PHI:445#NOS1#5518#Fusarium_graminearum#reduced_virulence	0	0	I1RA52#PHI:445#NOS1#5518#Fusarium_graminearum#reduced_virulence	I1RA52#PHI:445#NOS1#5518#Fusarium_graminearum#reduced_virulence	1	396	77	468	MDKKKSRSFTINFGPQHPAAHGVLRLILELDGEIVERVDPHIGLLHRGTEKLIETKTFLQAVPYFDRLDYVAPMNQEHAYALAVEKLLGIEIPIRGQLIRVLYSEIGRILSHLLNVTTQAMDVGALTPPLWGFEEREKLMVFYERASGSRMHAAYFRPGGVHQDIPPELVEDIGCWCDSFPSALNDISDLLTGNRIFKQRNVNIGTVKLEDAWGWGFSGVMIRGSGAAWDLRKSQPYECYSELDFDIPIGKHGDCYDRYLVRMMEMRESVKIIRQCVNRLLGKNKVGPVSASDPKIVPPKRADMKRSMESLIHHFKLYTEGYHVPVGEVYAAVEAPKGEFGVYLISDGGNKPYRCKIRAPGYAHLQAMEFLCKGHQLADVSAILGSLDIVFGEVDR	VSDRKVRHYTVNFGPQHPAAHGVLRLILELNGEEIVRADPHVGLLHRGTEKLIEYKTYLQALPYFDRLDYVSMMTNEQCFSLAVEKLLNVEIPERAKWIRTLFGEITRILNHLMSVLSHAMDVGALTPFLWGFEEREKLMEFYERVSGARLHAAYVRPGGVHQDIPVGLLDDIYQWATQFGDRIDETEEMLTDNRIWIERLRGVGVVPAAEALNLSFTGVMLRGSGVPFDVRKNQPYDAYDQVEFDVPVGTNGDCYDRYLCRMEEFRQSLRIIHQCLNKM----PAGPVRVEDYKVSPPPRAAMKENMEALIHHFLLYTKGYAVPPGETYSAIEAPKGEMGVYVVSDGSERPYRCHIRAPGFAHLGGFDHVSKGHLLADAVAVIGTMDLVFGEVDR	0	516	1328	396	60.35	239	153	306	1	4	77.27	44562	1	MVDSKDKR1SV1SHFY1IV19DN2IEVIEV1VA3IV12TY2FY3VL9ASPM1NTQN1HQACYFAS7GNIV3IE1GAQKLW2VT1YFSG2GT3SN2LMNS1TLTSQH9PF11VE4AV2SA1ML4FV10PVEG1VLED2GYCQ1CADTSQ1PGSDARLINDDEITSEDELM2GD3FWKIQE1NLVRNGIV1TV1KPLAEADE1WLGNWLGS1ST3IL4AVAPWF1LV2SN3EDCA1SDEQLVDE2IV1IV1KTHN8VC2ME1MF1EQ1VLKR2RH2VL1RKLML-G-K-N-KPVA3SRAVSE1PY1IVVS2KP2DA2RESN2SA5KL3EK2HA2VP2VT1AS1VI6FM3LVIV3GSNEKR4KH5YF3QGAGMFEDFHLVCS3QL3VASV1IVLI1STLM1I…	N/A	N/A	N/A	N/A	N/A	N/A	N/A	N/A	100	100
CLIBASIA_03870	0	CLIBASIA_03870	C6DC70#PHI:10595#ClpB#554#Pectobacterium_carotovorum#unaffected_pathogenicity	C6DC70#PHI:10595#ClpB#554#Pectobacterium_carotovorum#unaffected_pathogenicity	0	0	C6DC70#PHI:10595#ClpB#554#Pectobacterium_carotovorum#unaffected_pathogenicity	C6DC70#PHI:10595#ClpB#554#Pectobacterium_carotovorum#unaffected_pathogenicity	1	851	1	856	MNSDKYSDLMRNVLQSAQTYALAQGHQNLVPEHVLHIFLEDEQGAVYSLIQCSGGDIAQLKDYNQTVLSKIPKVTGGGAQVYLSQPLAVILSKSEEIAKKSGDSFVTAEKFLLAMVMETGGIGESLKKCGLKFSRLEESIKKLRKGRVADSVNAEQGFDALKKYCRDLTEEARNGKLDPVIGRDDEMRRAIQVLSRRTKNNPVLIGDPGVGKTAIIEGLASRIINGDIPESLKGKRLMALDMGALIAGAKFRGEFEERLKSLLCEIRSEDGEIILFIDELHVLVGAGKTDGAMDASNLLKPSLARGELHCIGATTLDEYRKYIEKDPALARRFQSLLVGEPTVTDTISILRGLKERYEQHHKVRISDSALVSAAVLSNRYITDRFLPDKAIDLMDEASA…	MRLDRLTNKFQLALADAQSLALGRDHQFIEPLHLMSALLHQDGGTVGPLLTVAGANLNHLKTEIDQAIKRLPQVEGTDGDVQPSSELVRVLNMCDKLAQKRNDTFISSELFVLAALESRGTLGDILKKAGVTQQGVTNAIDQVRGGEQVNDQGAEDQRQALKKFTIDLTERAEQGKLDPVIGRDEEIRRTIQVLQRRTKNNPVLIGEPGVGKTAIVEGLAQRIVNGEVPEGLKNKRVLSLDMGALVAGAKYRGEFEERLKGVLNDLSKQEGNVILFIDELHTMVGAGKADGAMDAGNMLKPALARGELHCVGATTLDEYRQYIEKDAALERRFQKVFVAEPTVEDTIAILRGLKERYELHHHVQITDPAIVAAAMLSHRYIADRQLPDKAIDLIDEAAS…	0	926	2392	856	53.5	458	393	613	1	5	71.61	44562	1	1NRSL1KRYLSTDNLKMFRQNLVA1QASD2TSYL2AGQRGD2NFLIVE1EL1VLLMHSIAFL1EHDQEDQG1AT1YGSP1ILQTCVSA1GADNILANQH2DTYENIQDTQVALISKKRIL1KQ1TE1GTGDAGQD1YQLP1QSPE1AVVRIV1SNKMSCEDEKIL1KQ1SRGN1ST1VITSAS1KL1LV2MAVLMEESTR1GTIL1EDSI3CA1LVKTFQSQRGLVETENSA1KDKQLV1KG1REVQAVDNSDVQNG2QDGQFRDQ4YFCTRI4ER1RENQ10DE1MI2AT4SQ11DE8IV4SQ2IV2DEIV2SG2GN2LVMLAS6IV4FY9SGLV1CNEDILRSSKEQDE1ENIV8VTLM5TA6SG1LM3SA8IV9KQ5PA2AE4SKLVLF1GA4TE3…	N/A	N/A	N/A	N/A	N/A	N/A	N/A	N/A	99	99
CLIBASIA_03870	0	CLIBASIA_03870	A0A2L1CGE9#PHI:10445__PHI:11348#ClpB#263#Francisella_tularensis#reduced_virulence__unaffected_pathogenicity__effector_(plant_avirulence_determinant)	A0A2L1CGE9#PHI:10445__PHI:11348#ClpB#263#Francisella_tularensis#reduced_virulence__unaffected_pathogenicity__effector_(plant_avirulence_determinant)	0	0	A0A2L1CGE9#PHI:10445__PHI:11348#ClpB#263#Francisella_tularensis#reduced_virulence__unaffected_pathogenicity__effector_(plant_avirulence_determinant)	A0A2L1CGE9#PHI:10445__PHI:11348#ClpB#263#Francisella_tularensis#reduced_virulence__unaffected_pathogenicity__effector_(plant_avirulence_determinant)	1	850	1	857	MNSDKYSDLMRNVLQSAQTYALAQGHQNLVPEHVLHIFLEDEQGAVYSLIQCSGGDIAQLKDYNQTVLSKIPKVTG-GGAQVYLSQPLAVILSKSEEIAKKSGDSFVTAEKFLLAMVMETGGIGESLKKCGLKFSRLEESIKKLRKGRVADSVNAEQGFDALKKYCRDLTEEARNGKLDPVIGRDDEMRRAIQVLSRRTKNNPVLIGDPGVGKTAIIEGLASRIINGDIPESLKGKRLMALDMGALIAGAKFRGEFEERLKSLLCEIRSEDGEIILFIDELHVLVGAGKTDGAMDASNLLKPSLARGELHCIGATTLDEYRKYIEKDPALARRFQSLLVGEPTVTDTISILRGLKERYEQHHKVRISDSALVSAAVLSNRYITDRFLPDKAIDLMDEAS…	MDINKFTIKLQEAIAEAQSYAFQQKATEFTSAHILKALLEQNDSVAISILSVCGVNIQNFIKAVNDMVDSVAVLSGEGNPQVTPSRDLIATLHRMQELANKNGDEFISSEVFLLAS-LEDKSLTGLYNKFGITKEKLTKAVNDYRGGEKVSSQNQEDMKGALDKYTVDLTDLARKGKIDPIIGRDSEIRRTIQVLQRRTKNNPVLIGEPGVGKTAIVEGLAQRIVNDEVPEGVKGKKVLSLDMGALLAGAKFRGDFEERLKSVLKELSKQEGNVILFIDELHTMVGAGKAEGSMDAGNMLKPALARGELKCVGATTLDEYREYVEKDPALERRFQKVLVDEPTVEDTIAILRGLKERYELHHGVNITDSAIVSAATLSHRYITDRQLPDKAIDLVDEAA…	0	895	2313	858	52.45	450	399	614	5	9	71.56	44562	1	1NDSIDN1YFSTDILKMLRQNEVALIQASE2TS2LFAQ1GKHAQTNELFVTPSEA1VI1HKIAFL2DQENQDGSAVVAYI1LIILQSCVSC1GVDN1AQQNLFKIDKYANVQNTDVMLVSDKSIVPAKVVLTS1-E1GNAP2YTLP1QRPD1AIVAIT1SHKRSMEQ1IL1KN1SN2SE1VITSAS1KV4MSV-ML1TDGKGSILGTEGSLLYKN1CF1LIKTFKSERK1ETEKSAIVKNKDLY1KG1REVKAVDS1VQ1AQ1QDGMFKDG2KD2CTRV3EDEL2NK2LI2VI4DS1MI2AT4SQ11DE8IV4SQ2IV1GDDEIV2SGLV3RKLVMLAS6IL7ED7LV1CK1ILRSSKEQDE1ENIV8VTLM5TADE1AS3SG1LM3SA6HK1IV9KE1…	N/A	N/A	N/A	N/A	N/A	N/A	N/A	N/A	99	99
CLIBASIA_03870	0	CLIBASIA_03870	V5VGK1#PHI:11207#ClpB#470#Acinetobacter_baumannii#reduced_virulence	V5VGK1#PHI:11207#ClpB#470#Acinetobacter_baumannii#reduced_virulence	0	0	V5VGK1#PHI:11207#ClpB#470#Acinetobacter_baumannii#reduced_virulence	V5VGK1#PHI:11207#ClpB#470#Acinetobacter_baumannii#reduced_virulence	1	850	1	853	MNSDKYSDLMRNVLQSAQTYALAQGHQNLVPEHVLHIFLEDEQGAVYSLIQCSGGDIAQLKDYNQTVLSKIPKVTGGGAQVYLSQPLAVILSKSEEIAKKSGDSFVTAEKFLLAMVMETGGIGESLKKCGLKFSRLEESIKKLRKGRVADSVNAEQGFDALKKYCRDLTEEARNGKLDPVIGRDDEMRRAIQVLSRRTKNNPVLIGDPGVGKTAIIEGLASRIINGDIPESLKGKRLMALDMGALIAGAKFRGEFEERLKSLLCEIRSEDGEIILFIDELHVLVGAGKTDGAMDASNLLKPSLARGELHCIGATTLDEYRKYIEKDPALARRFQSLLVGEPTVTDTISILRGLKERYEQHHKVRISDSALVSAAVLSNRYITDRFLPDKAIDLMDEASA…	MRFEKFTNRLQQALSDAQSLAMGKDHTAIAGIHILSTLLEEPSN--ISLLQQAGARLPELKQKLEQALKDAPTIANPTGDVNLNPEAVKALNLADRYAQKAGDEFLSTDWVLLGLA-ETGETKNILSAVGVTPDSLRKVIENIRGSDKVMSNNHEDQRDSLNKYTIDLTERALSGKLDPVIGRDDEIRRTIQVLSRRTKNNPVLIGEPGVGKTAIVEGLAQRIVNGEVPEGLKNKRVLSLDLGSLLAGAKYRGEFEERLKAVLKDLAKHEGEIILFIDELHTLVGAGKGDGAMDAGNMLKPALARGELRCVGATTLDEYRQYIEKDAALERRFQKVLVDEPSVEDTIAILRGLKEKYATHHGVQILDSAIIAAAKMSHRYITDRQLPDKAIDLIDEAAS…	0	892	2304	856	53.04	454	393	609	4	9	71.14	44562	1	1NRSFDE1YFSTDNLRMLRQNQVA1QSSD2TSYL1LMAGQKGD1QTNALIVAPGEI1VI1HSITFL2DEEPQSGNA-V-YI2IL1CQSA1GADRILAPQE2DQYKNLQETQVA1SKKDIA1KTVITAGNGPGTAGQD1YN1SNQPPELAAVVKIA1SNKLSAEDERIY1KQ1SA2SE1VLTSATEDKWFV2AGMLVAM-3GEITGKENSI1KSKACV1LVKTFPSDRS1EREKSV1KEKNLI1KGGSRDVKAVDM1VN1AH1QDGQFR1AS1KN2CTRI4ER1RLNS12MI2AT16DE8IV4SQ2IV2DEIV2SG2GN2LVMLAS2ML1AS1IL4FY9SALV1CKEDILRASKEHDE11VT6TG6SG1LM3SA6HR1IV9KQ5PA2AE4SKLV2GD2TS…	N/A	N/A	N/A	N/A	N/A	N/A	N/A	N/A	99	99
CLIBASIA_03870	0	CLIBASIA_03870	P9WPD1#PHI:9919#ClpB#1773#Mycobacterium_tuberculosis#reduced_virulence	P9WPD1#PHI:9919#ClpB#1773#Mycobacterium_tuberculosis#reduced_virulence	0	0	P9WPD1#PHI:9919#ClpB#1773#Mycobacterium_tuberculosis#reduced_virulence	P9WPD1#PHI:9919#ClpB#1773#Mycobacterium_tuberculosis#reduced_virulence	25	846	25	841	GHQNLVPEHVLHIFLEDEQGAVYSLIQCSGGDIAQLKDYNQTVLSKIPKVTGGGAQVYLSQPLAVILSKSEEIAKKSGDSFVTAEKFLLAMVMETGGIGESLKKCGLKFSRLEESIKKLRKGRVADSVNAEQGFDALKKYCRDLTEEARNGKLDPVIGRDDEMRRAIQVLSRRTKNNPVLIGDPGVGKTAIIEGLASRIINGDIPESLKGKRLMALDMGALIAGAKFRGEFEERLKSLLCEIRSEDGEIILFIDELHVLVGAGKT-DGAMDASNLLKPSLARGELHCIGATTLDEYRKYIEKDPALARRFQSLLVGEPTVTDTISILRGLKERYEQHHKVRISDSALVSAAVLSNRYITDRFLPDKAIDLMDEASARVRMQIDTKPEVLDELDRRIICL…	GNPEIRPAHLLMALLTQNDGIAAPLLEAVGVEPATVRAETQRLLDRLPQATGASTQPQLSRESLAAITTAQQLATELDDEYVSTEHVMVGLATGDSDVAKLLTGHGASPQALREAFVKVRGSARVTSPEPEATYQALQKYSTDLTARAREGKLDPVIGRDNEIRRVVQVLSRRTKNNPVLIGEPGVGKTAIVEGLAQRIVAGDVPESLRDKTIVALDLGSMVAGSKYRGEFEERLKAVLDDIKNSAGQIITFIDELHTIVGAGATGEGAMDAGNMIKPMLARGELRLVGATTLDEYRKHIEKDAALERRFQQVYVGEPSVEDTIGILRGLKDRYEVHHGVRITDSALVAAATLSDRYITARFLPDKAIDLVDEAASRLRMEIDSRPVEIDEVERLVRRL…	0	882	2280	824	53.52	441	374	594	4	9	72.09	44562	1	1HNQPNELIVR1EA1VL1HMIAFL1ETDQENQD1AIVAYASP1ILQECASV1GVDEIP1QTLVKRDAYENT1TRVL1SDKRIL1KQVA2GAGSAT1VPYQ2QRPELSALVAIALISTKTSAEQEQIL1KTKESLGD1SEFY1TSAT1KHFVLMLVAGMLVAMTEGTDGSGDIVGAEKSL1KTKGCH1LAKSFPSQRA1ER1SAIFKV1LV1KGGSRAVRAVDT1VPNEAP1QAGTFYDQ2KQ2CSRT3EAER2NE10DN1MI2AVIV15DE8IV4SQ2IVNA2IV4KRGD1RTLIMV3ML1ASLMIV2AS1FY9SALV1CDED1RKSNESDA1EQ2LT6VTLI4KA1-GDE5SG1LMLI2SM6HRCLIV10YH4PA2AE4SQLVLY4TS1TE3SG6ED3…	N/A	N/A	N/A	N/A	N/A	N/A	N/A	N/A	96	96
CLIBASIA_03870	0	CLIBASIA_03870	K3W1P7#PHI:11619#FpHsp104_(FPSE_03525)#101028#Fusarium_pseudograminearum#reduced_virulence	K3W1P7#PHI:11619#FpHsp104_(FPSE_03525)#101028#Fusarium_pseudograminearum#reduced_virulence	0	0	K3W1P7#PHI:11619#FpHsp104_(FPSE_03525)#101028#Fusarium_pseudograminearum#reduced_virulence	K3W1P7#PHI:11619#FpHsp104_(FPSE_03525)#101028#Fusarium_pseudograminearum#reduced_virulence	1	845	1	884	MNSD-KYSDLMRNVLQSAQTYALAQGHQNLVPEHVLHIFLE-------DEQGA-------VYSLIQCSGGDIAQLKDYNQTVLSKIPKVTGGGAQVYLSQPLAVILSKSEEIAKKSGDSFVTAEKFLLAMVMETGGIGESLKKCGLKFSRL-EESIKKLRKGRVADSVNA--EQGFDALKKYCRDLTEEARNGKLDPVIGRDDEMRRAIQVLSRRTKNNPVLIGDPGVGKTAIIEGLASRIINGDIPESLKGKRLMALDMGALIAGAKFRGEFEERLKSLLCEIRSEDGEIILFIDELHVLVGAGKT-DGAMDASNLLKPSLARGELHCIGATTLDEYRKYIEKDPALARRFQSLLVGEPTVTDTISILRGLKERYEQHHKVRISDSALVSAAVLSNRY…	MNSRMDFTDRAQKAVEDAMALAEQYGHSQLVPVHLAVSLLDPPADPSKDQQNGPPPTSTLFRQVVERAHGDPQIFDRALKKILVRLPSQDPPPEHVSLAPQFHNVLRKAMDLQKVQKDTYIGVDHLITAL-SEEATIQAPLKEANVPKAKLIQEAVQAIRGTKRVDSKTADTEEENENLAKFTIDMTEMAREKKMDPVIGREEEIRRVVRILSRRTKNNPVLIGEPGVGKTTVIEGLAQRVVNRDVPDNLKSCKLLSLDVGALVAGSKYRGEFEERMKGVLKEITESKDVIILFVDEIHLLMGAGSSGEGGMDAANLLKPMLARGQLHCIGATTLAEYRKYVEKDAAFERRFQQVIVKEPTIPETVSILRGLKERYDRHHRVTILDSALVAAANLAARY…	0	719	1856	893	44.12	394	442	578	13	57	64.73	44562	1	3DR-MKDYFST1LRMARQNKVALVQESD1QMTAYL1LEAQQY2QSNQ3EV1VLLAHVISFL1ED-P-P-A-D-P-S-K1EQ1GNAG-P-P-P-T-S-T-LVFYRSQLVIVQECRSAGH2IPAQQILFKDDRYANLQKTKVI1SVKRIL1KSVQTDGPGPGPAEQH1YS1SAQPPQLFAHVNIV1SR1SAEMEDILAQ1KVSQGK1STFYVITGAVEDKHFLLILT1MLV-MS1TEGAGT1GQEASP2KECAGNLVKPFKSARK1-IEQ1SAIVKQKALI1KGGTRKVRAV2VKNT1-D-T1QEGEFNDEAN1KA1YFCTRI1LM2EM2NEGK1LM6DEDE1MI2AVIVQRVI13DE6ATIV5SQ1IVIV1GR1IV1EDSN2GSKCRK1MLAS2MV3IV2…	N/A	N/A	N/A	N/A	N/A	N/A	N/A	N/A	99	99
CLIBASIA_03930	0	CLIBASIA_03930	D5AF41#PHI:4071#IMPDH#1307#Streptococcus_suis#reduced_virulence	D5AF41#PHI:4071#IMPDH#1307#Streptococcus_suis#reduced_virulence	0	0	D5AF41#PHI:4071#IMPDH#1307#Streptococcus_suis#reduced_virulence	D5AF41#PHI:4071#IMPDH#1307#Streptococcus_suis#reduced_virulence	14	490	13	491	LTFDDVLLRPEFSNVLPRDIDISTRIAKDFTLNLPIMSAAMDQVTDSRLAIAMAQAGGLGVIHRNFSPSEQVAQVHQVKKFESGMVVNPVTISPYATLADALALMKKYSISGIPVVES-DVGKLVGILTNRDVRFASNAQQAVGELMTRN-LITVKKTVNLENAKALLHQHRIEKLLVVDDDGCCIGLITVKDIERSQLNPNATKDSKGRLRVAAAVSVAKDIADRVGPLFDVNVDLVVVDTAHGHSQKVLDAVVQIKKNFPSLLVMAGNIATAEGALALIDAGADIIKVGIGPGSICTTRVVTGVGCPQLSAIMSVVEVAERAGVAIVADGGIRFSGDIAKAIAAGSACVMIGSLLAGTDESPGDIFLYQGRSFKSYRGMGSVAAMERGSSARYSQDG…	FTFDDVLLIPAESHVLPHDIDLKTQLAPNLTLNLPIISAAMDTVTDSKMAIAMARAGGLGVIHKNMSIAEQADEVRKVKRSENGVIIDPFFLTPEHTIAEAEKLMATYRISGVPIVETLENRKLVGIITNRDMRFISDYSQPISTNMTSDELVTAPVGTDLATAEAILHKHRIEKLPLVDENGRLSGLITIKDIEKVIEFPNAAKDEFGRLLVAGAVGVTSDTFERAEALFEAGADAIVIDTAHGHSAGVLRKIKEIRDHFPTRTLIAGNIATAEGARALYEAGVDVVKVGIGPGSICTTRVIAGVGVPQVTAIYDAAGVAREYGKTIIADGGIKYSGDIVKALAAGGHAVMLGSMFAGTDEAPGETEIFQGRKFKTYRGMGSIAAMKQGSKDRYFQAS…	0	551	1420	479	56.78	272	205	356	2	2	74.32	44562	1	LF7RI1EAFE1NH3RH3ILSK1RQIL1KPDNFL6MI5QT4RKLM5QR8RK1FM1PISA2VAADQE1HRQK2KRFS1SN1MVVIVIND1VFTFILST1YEAH1LI1DE1LEAK2KAKT1SR3IV1VI2ST-LDEVNGR5LI4VM2AI1NDAYQS1APVIGSETLN2RSND-E1IV1VAKPKVTGVTND1EANT1KE1LI2QK6LPVL2DEDN1CRCLIS4VI4RKSVQILENF3TA2SEKF3RL2AG2SG1ATKS1ITAFDE1VAGEPA2DEVANGVA1LAVI1VI7QAKG2DRAKVIVKQE1KRKDNH2STLRLTVLMI10LR2IYDE2AV1IVIV14VITA3CV2LVST2MYSDVAVAEG2ERREAY1VKAT1VI5RKFY4AV2IL3SGAHCA2IL2L…	N/A	N/A	N/A	N/A	N/A	N/A	N/A	N/A	97	97
CLIBASIA_04230	0	CLIBASIA_04230	Q81J94#PHI:6483#Mfd#1396#Bacillus_cereus#loss_of_pathogenicity	Q81J94#PHI:6483#Mfd#1396#Bacillus_cereus#loss_of_pathogenicity	0	0	Q81J94#PHI:6483#Mfd#1396#Bacillus_cereus#loss_of_pathogenicity	Q81J94#PHI:6483#Mfd#1396#Bacillus_cereus#loss_of_pathogenicity	68	1098	79	1095	VIIFPAWDCLPYDRVSPSPYVVTRRLSCISNLVSFNSSKETIIVLTTVSAVMCRSVNIMSI-KDYKLSIQSKDQIDMAKVIEKLETNGFQRVNAVYKVGEYAVRGGILDVYEPTKKYPVRLDFFGNTIDSLRLFDSSTQRTIREISIFEINTLSEVMLTSQNISRFRENYLANFGTTTQ---EDPLYVAI-----------SQGRRYPGMEHWLPFFYQSMETIFPYLSE-FCIITDPL--VKETARKRSQLIQDYYEARLQYSSDKKQYSVYKPIAPEKLYLNYQQFDALIQTTHKLVQMTAFNQQETAHNRVVHLNAFPGKSWVPSAVQKIESQDNWESGGRFDKFLSHVAQQAQKGIKTIISASSQGALQHLIHLIESHGFKKIKKINTLTEINSL…	VWLYPVNELIASEIGVASPELKAQRIEVLNRL----AAGENGIIVAPVAG-LRRFLPIKELWKQKQVEINLGQEIDLDALLHTLHHIGYERKSMVEAPGEFSLRGGILDIYPLTEELPFRIEFFDTEVDSIRLFDVDEQRSQGKKESVRFGPATEFLFSQEELKSGIQHLEEGLTKTMQKLSDDKLKTTVLETVSHEIEMLKNGQSIEQMFKYLSIFYKEPASLIDYLPEDGVVILDEISRIQETASHLETEEAEWYISLLGEGTIIQDLSFSHPFEG---FLHHKK--------RSFVYLTLFLRH-IAHTH-------------PQNIVNVTCKTMQDFHGQMNLLKTEIDRWNEGHFTTVVLGTDDERVKKLQHILSDYDIEA----DIVEGTDIL…	0	585	1509	1055	32.32	341	652	586	17	62	55.55	44562	1	1IWILFY1AVWNDECLLIPAYSDERIVGSVPA2YEVLVKTARQ1LISECVILSNNR1V-S-F-N-SASAKG1TNIG1VILVTATP1SAAGV-MLCR1SFVLNP1MKSEIL-W1DQYKKQLVSE1QNSLKGDQQE2MLADKAVLILEHKT1EHTHNI1FYQE1VKNSAM1YEKAVP2YFASVL6VI1EPPL1KEKEYL1VF1LIDE2GDNTTEIV2LI4SVSDTE2TSIQRGEKIKSEISFVERIFNGTPLAST1VFMLLFTSSQQENEILSKRSFGRIEQNHYLLEAENGFLGTTK1TM1-K-L-SED1PK1YKVTATIV-L-E-T-V-S-H-E-I-E-M-LSKQN1RQRSYIPEGQ1EFHKWY1PSFI2QKSEMPEATSILFIPD2SP1-DFGCVIV1…	N/A	N/A	N/A	N/A	N/A	N/A	N/A	N/A	87	87
CLIBASIA_04460	0	CLIBASIA_04460	Q8DYL6#PHI:11576#UvrB#1311#Streptococcus_agalactiae#unaffected_pathogenicity	Q8DYL6#PHI:11576#UvrB#1311#Streptococcus_agalactiae#unaffected_pathogenicity	0	0	Q8DYL6#PHI:11576#UvrB#1311#Streptococcus_agalactiae#unaffected_pathogenicity	Q8DYL6#PHI:11576#UvrB#1311#Streptococcus_agalactiae#unaffected_pathogenicity	136	795	5	661	KDITFFQMQTDYHPSGDQPAAIAQLLKGIHSREKVQLLLGVTGSGKTFTMAKVIEAMQRPAIVMAPNKILAAQLYSEFKNFFPHNAVEYFVSYYDYYQPEAYVPRTDTYIEKESSINEQIDRMRHSATRSLLERNDCIVVSSVSCIYGIGSVESYSQMIVQLKIGDSVEQKELLSSLVKQQYKRQDIGIIRGTFRVCGDSIEIFPSHLEDVAWRVSMFGNDIEEISEFYPLTGQKIRNVETIKIYANSHYVTPRPTLNTAMKYIKEELKMRLIELEKEGRLLEAQRLEQRITYDLEMLETTGSCQSIENYSRYLTGRNPGEPPPTLFEYIPEDSLLFVDESHVTIPQISGMYRGDFHRKATLAEYGFRLPSCMDNRPLRFEEWNCLRPTTIVVSATPGS…	KDTNRFKLVSKYSPSGDQPQAIETLVDNIEGGEKAQILKGATGTGKTYTMSQVIAQVNKPTLVIAHNKTLAGQLYGEFKEFFPDNAVEYFVSYYDYYQPEAYVPSSDTYIEKDSSVNDEIDKLRHSATSSLLERNDVIVVASVSCIYGLGSPKEYADSVVSLRPGQEISRDQLLNNLVDIQFERNDIDFQRGKFRVRGDVVEVFPASRDEHAFRIEFFGDEIDRIREIESLTGRVLGEVEHLAIFPATHFMTNDEHMEEAISKIQAEMENQVELFEKEGKLIEAQRIRQRTEYDIEMLREMGYTNGVENYSRHMDGRSEGEPPFTLLDFFPEDFLIMIDESHMTMGQIKGMYNGDRSRKEMLVNYGFRLPSALDNRPLRREEFESHVHQIVYVSATPGD…	0	739	1908	660	54.55	360	297	482	2	3	73.03	44562	1	2ITTNFR1QKMLQVTSDK1HS6AQ2AEQT1LVKDGN1HESGRG2VA1LI1LK1VA2ST3FY2ASKQ2EAAQMVQNRK1ATIL1MI1PH2IT2AG3SG3NE3HD20RSTS6ED2IV1EDQE2RKML5RS7CV3SA7IL2VPEKSE1SAQDMSIV1QS1KRIP1DQSEVIESQRKDEQ2SNSN2KDQI1YFKE1QN2GDIFIQ2TK3CR2SVIV1IV2SAHSLREDDEVH1WF1VISEMF2NDDE1EDER1SR1FIYEPS3QRKVILRGNE2THILKA1YFAPNAST1YFVM1PNRDPETHLMNETE1MIKSYK1KQEA1LMKEMNRQLVIEELLF4RK1LI4LIER2ITTE2LI3ERTETM1SYCTQNSGIV5YHLMTD2NSPE4PF2FLEDYFIF3SF1…	N/A	N/A	N/A	N/A	N/A	N/A	N/A	N/A	82	82
CLIBASIA_04725	0	CLIBASIA_04725	F9WWR1#PHI:4966#Sdi1#1047171#Zymoseptoria_tritici#unaffected_pathogenicity	F9WWR1#PHI:4966#Sdi1#1047171#Zymoseptoria_tritici#unaffected_pathogenicity	0	0	F9WWR1#PHI:4966#Sdi1#1047171#Zymoseptoria_tritici#unaffected_pathogenicity	F9WWR1#PHI:4966#Sdi1#1047171#Zymoseptoria_tritici#unaffected_pathogenicity	4	611	43	643	SSNLKSSYTYVDHSYDVVVVGAGGAGLRATLGMAEKGFKTACITKVFPTRSHTVAAQGGIAASLANMTPDSWQWHLYDTIKGSDWLGDVDAIQYLAMEAPQSVYELEHYGVPFSRNEAGKIYQRPFGGHMQNYGEGPPVQRTCAAADRTGHAILHTLYGQALKNNAEFFIEYFALDLIINSEGCCVGVVAWQLETGEIHRFSAKLVVLATGGYGRAYFSATSAHTCTGDGAGMVARAGLPLQDMEFVQFHPTGIYGAGCLITEGARGEGGYLVNSKGERFMERYAPSAKDLASRDVVSRCMMMEIREGRGVGKSKDHIHLYLNHLDPAVLQERLPGISESARIFAGVDVTRDPIPVIPTVHYNMGGIPTNYWGEVLDANSKNPERFAPGLMAIGEAGCA…	SGSISAKYPIIDHEYDALVVGAGGAGLRAAFGLAEAGFNTACISKLFPTRSHTVAAQGGINAALGNMHDDDWRWHMYDTVKGSDWLGDQDAIHYMTREAPASVYELENYGCPFSRTDDGKIYQRAFGGQSKEFGKGGQAYRCCAAADRTGHALLHTLYGQSLRHNTNYFIEFFAIDLIME-DGECKGVIAYNQEDGTLHRFRSHHTVLATGGYGRAYFSCTSAHTCTGDGMAMVARAGLPNQDLEFVQFHPTGIYGAGCLITEGSRGEGGYLLNSEGERFMERYAPTAKDLASRDVVSRSMTMEIREGRGVGPDKDHIYLQLSHLPPEVLHERLPGISETASIFAGVDVTKQPIPVLPTVHYNMGGIPTKYTGEVLTVDENGKDKVVPGLFACGEAACV…	0	738	1904	608	60.86	370	231	445	3	7	73.19	44562	1	1SGNSLIKSSASK1TPYIVI2SE2VAVL11TALF1ML2KA2KN4TS1VL14AN1SA1AG2THPD1SD1QR2LM3IV8VQ3QH1LMATMR3QA6HN2VC4NTEDAD6PA3HQMSQKNEYF1EK1PGPQVAQY1TC10IL7AS1KRNH1ATENFY3YF2LI3IMNES-ED1CE1VK2VI1WYQNLQ1TD1ETIL3SRASKHLHVT13AC10AMGA8LN2ML20AS7VL2KE10ST12CS1MT10KPSD4HY1YQ1NS2DP1AE2QH8ST1RS8RKDQ4IL12NK1WT4DTAVNDSEKNNGPKEDRKFVAV3MF1IC3GA1AV9SA3IL2VI5AVVSIHRTAISREDMNIFDSKPSNSK1IHPKSELVDSIASDSACGDAREIAMVDSRIFV1RQLI1HT3H…	N/A	N/A	N/A	N/A	N/A	N/A	N/A	N/A	99	99
CLIBASIA_04725	0	CLIBASIA_04725	P0AC41#PHI:7964#SdhA#562#Escherichia_coli#reduced_virulence	P0AC41#PHI:7964#SdhA#562#Escherichia_coli#reduced_virulence	0	0	P0AC41#PHI:7964#SdhA#562#Escherichia_coli#reduced_virulence	P0AC41#PHI:7964#SdhA#562#Escherichia_coli#reduced_virulence	18	573	8	558	YDVVVVGAGGAGLRATLGMAEKGFKTACITKVFPTRSHTVAAQGGIAASLANMTPDSWQWHLYDTIKGSDWLGDVDAIQYLAMEAPQSVYELEHYGVPFSRNEAGKIYQRPFGGHMQNYGEGPPVQRTCAAADRTGHAILHTLYGQALKNNAEFFIEYFALDLIINSEGCCVGVVAWQLETGEIHRFSAKLVVLATGGYGRAYFSATSAHTCTGDGAGMVARAGLPLQDMEFVQFHPTGIYGAGCLITEGARGEGGYLVNSKGERFMERYAPSAKDLASRDVVSRCMMMEIREGRGV-GKSKDHIHLYLNHLDPAVLQERLPGISESARIFAGVDVTRDPIPVIPTVHYNMGGIPTNYWGEVLDANSKNPERFAPGLMAIGEAGCASVHGANRLGSNSL…	FDAVVIGAGGAGMRAALQISQSGQTCALLSKVFPTRSHTVSAQGGITVALGNTHEDNWEWHMYDTVKGSDYIGDQDAIEYMCKTGPEAILELEHMGLPFSRLDDGRIYQRPFGGQSKNFG-GEQAARTAAAADRTGHALLHTLYQQNLKNHTTIFSEWYALDLVKNQDGAVVGCTALCIETGEVVYFKARATVLATGGAGRIYQSTTNAHINTGDGVGMAIRAGVPVQDMEMWQFHPTGIAGAGVLVTEGCRGEGGYLLNKHGERFMERYAPNAKDLAGRDVVARSIMIEIREGRGCDGPWGPHAKLKLDHLGKEVLESRLPGILELSRTFAHVDPVKEPIPVIPTCHYMMGGIPTKVTGQALTVNEKGEDVVVPGLFAVGEIACVSVHGANRLGGNSL…	0	550	1418	557	54.04	301	249	378	3	7	67.86	44562	1	YF1VA2VI6LM2TA1GQMIASEQKS1FQKTTC1CLILTS10AS5ATAVSA1AG1MTTHPE1SN1QE2LM3IV4WYLI2VQ3QE1LMACMKETAG1QESAVIYL4YM1VL4NLEDAD1KR8HQMSQK1YF1E-1PEPQVAQA2CA9IL5GQ1AN3NHATETFI1IS1YWFY4IVIK1SQED1CACV2VCVT1WLQCLI4IVHVRY1SK1KRLAVT6YA2AI1FQ1AT1SN2TICN4AV2VAAI3LV1LV4FMVW7YA3CV1IV3AC7VL1SKKH10SN5SG4SA1CSMI1MI7VC-D1KPSWKGDP1IAHK1YK1ND2DGPKAE2QEES5SL1SLAS1IT2GH2VPTVRKDE7VC2NM6NKYVWT1EQVA1DTAV1SE1NGPEEDRVFVAV3MF1IV2AI…	N/A	N/A	N/A	N/A	N/A	N/A	N/A	N/A	91	91
CLIBASIA_04765	0	CLIBASIA_04765	G2XIN6#PHI:9378#VdOGDH_(VDAG_10018)#27337#Verticillium_dahliae#reduced_virulence	G2XIN6#PHI:9378#VdOGDH_(VDAG_10018)#27337#Verticillium_dahliae#reduced_virulence	0	0	G2XIN6#PHI:9378#VdOGDH_(VDAG_10018)#27337#Verticillium_dahliae#reduced_virulence	G2XIN6#PHI:9378#VdOGDH_(VDAG_10018)#27337#Verticillium_dahliae#reduced_virulence	13	956	70	1037	SFLDGTNCCYIEDLYKSYQEDPSSVCKDWYPLFSFLDENSEEYDNLEDGIASFLKEESVASAVFSQKKSAVES-SCSLGETQSVKDFFQVMKMIDAYRSYGHFKANIDPLGYNSHQKDLSELSPA-----HYGFVKADYDRKICM-KGVL------GLESATIPEIVDVLSHLYCSNIGVEFMHIVDSIERDWVRNTIEDYDFSSNFSKEEQRDILDKLVRAEGFEKFIDIKYKGAKRFGADGSEVIIPAIEEIIRQGVQQGVDEMILGMAHRGRLNVLSQIMNKLPRSIFYEFKGKGPSEKEYSGDVKYHLGLCCNRQI-CGKDVKLLLQSNPSHLEFVDPVVIGSVRARQDLKAGIVGEKSISLVERSRVLPLIIHGDAAFAGQGIVSETFGLSGLS…	NFLSGNTANYIDEMYMQWKEDPKSVHVSWQVYFR----------NMESGDMPISQAFTPPPSLVPGATGGVPRLAAGSAEGTEVANHLKVQLLVRAYQARGHNKANIDPLGIRNEQKGFGNIKPKELTLEHYQFTEKDLDTEYSLGPGILPRFKREGREKMTLREIIDACERIYCGSYGIEFIHIPDREKCDWLRERLE-VPQPFKYSIDEKRRILDRLIWSSSFESFLSTKYPNDKRFGLEGCETLVPGMKALIDRSVDYGVKDIVIGMPHRGRLNVLSNVVRKPNESIFSEFAGTAGAEDEGSGDVKYHLGMNFERPTPSGKRVQLSLVANPSHLEAEDPVVLGKTRAIQHYNNDEKAHRT--------AMGVLLHGDAAFAAQGVVYECLGFHSLP…	0	767	1981	991	42.18	418	503	574	13	70	57.92	44562	1	SN2DS1TNNTCACN2EDDELM1KMSQYWQK3SK2CHKVDS1YQPVLY1SRF-L-D-E-N-S-E-E-Y-D-1LM1DS1IDAMSPFILSKQEAEFSTVPAPSPASVLFVSPQGKAKTSGAG1EPSR-LSACASGLSGA1TGQTSE1KADNFHFLQK1MQKLMLIVDR2RQSAYR2FN8YINRSNHE2DGLFSGENLISK1AK-E-L-T-L-E2GQ1VTKEAK1YL1RTKEIYCSML-GKP1VI1-P-R-F-K-R-E1LR1SKAM1ILPR2VI1VALCSEHRLI2SGNSIY1VI2MI2VP1SRIEEKRC2VL1NETRIL1D-YVDPFQSPSFNKFY1KIED1QK1DR3KR1VIRWASESGS2KS1ILDSIT2KPGNAD4ALDE1SC1VTILIV1AGIMEKEA…	N/A	N/A	N/A	N/A	N/A	N/A	N/A	N/A	99	99
CLIBASIA_04805	0	CLIBASIA_04805	A0A0F6B0W4#PHI:6893__PHI:10099#SufB__STM14_RS07705_(sufB)#28901#Salmonella_enterica#unaffected_pathogenicity__reduced_virulence	A0A0F6B0W4#PHI:6893__PHI:10099#SufB__STM14_RS07705_(sufB)#28901#Salmonella_enterica#unaffected_pathogenicity__reduced_virulence	0	0	A0A0F6B0W4#PHI:6893__PHI:10099#SufB__STM14_RS07705_(sufB)#28901#Salmonella_enterica#unaffected_pathogenicity__reduced_virulence	A0A0F6B0W4#PHI:6893__PHI:10099#SufB__STM14_RS07705_(sufB)#28901#Salmonella_enterica#unaffected_pathogenicity__reduced_virulence	19	489	21	495	YKYGFETNIQVDKAPKGLNEDIIRFISAKKNEPDWMLEWRLLAYRRWLTMKDPSWARIRYPAIDFDDLYYYAAPKS-------IVGPQSLDD------VDPELLRTYEKLGIPIREQEILAGVQTSKVAVDAVFDSVSVVTTFKEELKKSGVIFMPISEAICEHPDLVKKYLSTVVPVGDNFYAALNSAVFTDGSFVYIPKGVRCPMELSTYFRINEKGTGQFERTLIIADEGSYVSYLEGCTAPQRDENQLHAAVVELVALDNAEIKYSTVQNWYPGDSQGKGGIYNFVTKRGDCRGMRSKISWTQLETGSAITWKYPSCLLRGEQSCGEFYSIAISNGFQQIDSGTKMLHLAKNTTSRIVSKGISAGFSNNTYRGKVSVHRGAAHSRNFTQCDSLLI…	YKEGFFTQLPTDELAKGISEEVVRAISAKRNEPEWMLEFRLNAYRAWLDMDEPHWLKAHYDKLNYQDYSYYSAPSCGNCDDSCVSQPGAVQQTGANTFLSKEVEDAFEQLGVPVREGK--------EVAVDAIFDSVSVATTYREKLAEQGIIFCSFGEAIHDHPDLVRKYLGTVVPGNDNFFAALNAAVASDGTFIYVPKGVRCPMELSTYFRINAEKTGQFERTILVADEGSYVSYIEGCSAPVRDSYQLHAAVVEVIIHKDAEVKYSTVQNWFPGDNN-TGGILNFVTKRALCEGENSKMSWTQSETGSAITWKYPSCILRGDNSIGEFYSVALTSGHQQADTGTKMIHIGKNTRSTIISKGISAGHSQNSYRGLVKIMPTATNARNFTQCDSMLI…	0	610	1572	484	59.3	287	175	370	4	22	76.45	44562	1	2YE2EF1NQILQPVT1KEALPA2LINS1DEIVIV1FA4KR3DE4WF2LN3RA2TD1KDDE1SH1ALRKIARH1PDAKILDNFYDQ1LYYS2AS2KSSC-G-N-C-D-D-S-CIVVSGQ1QGSALVDQDQ-T-G-A-N-T-FVLDSPK1LVLERDTAYF1KQ2IV1IV2QGEKI-L-A-G-V-Q-T-S-KE5VI6VA2FYKR1EK1KAKESQ1VI2MCPSIFSG3CHED5KR3SG4VGGN3YF4SA2FATS2ST1VI1IV17EAKEGK7LIILIV9LI3TS2QV2ESNY8LVVIAILHDKND2IV8YF3SNQNG-KT3YL6GADL1RE1MERN2IM4LS13LI3EDQN1CI5IV1ILSTNS1FH2IA1ST4LI1LIAG3TR1RT1VI7FH1NQ1TS3KL1…	N/A	N/A	N/A	N/A	N/A	N/A	N/A	N/A	96	96
CLIBASIA_00775	0	CLIBASIA_00775	Q59185#PHI:11477#Lon-1_(BB0253)#139#Borreliella_burgdorferi#reduced_virulence	Q59185#PHI:11477#Lon-1_(BB0253)#139#Borreliella_burgdorferi#reduced_virulence	0	0	Q59185#PHI:11477#Lon-1_(BB0253)#139#Borreliella_burgdorferi#reduced_virulence	Q59185#PHI:11477#Lon-1_(BB0253)#139#Borreliella_burgdorferi#reduced_virulence	29	784	32	803	PLLPLRDIVVFPYMIVPLFVGREKSVRALDEAMNSHKKIILVT-------QMNSNDENPI----ASSVYRIGTIVDIVQILRLPDGTVKILVEGSVRARIVEYIEREDF----LEAITQVLPDPT-EDPVELEALSRSVIAEFSNYIKLNKKISPEVIGITSQIEGFSKLADVIAANLSIKVAERQKILEAVSVKERLEMLLVFMESEISVLQVEKRIRSRVKRQMEKTQREYYLHEQMKAIQKELDNGEEGRDEISDFEARISKIRLSKEAREKALSELQKLRQMNPLSAESSVVRNYLDWLLGVPWD--KKSKTKKNLDFAIRILDQDHFGLEKVKERIIEYLAVQMRVIKNKGLILCFVGPPGVGKTSLAQSIAKATGRQYVRMSLGGVYDEADIR…	PLIAVPSHPVFPGMFIPIVLISDSDMKAIDYAMKGNGIIALFVLNDKFLEKNNNNAQQKLIIDYSKDIYSVGVTGKIIKKINLPDGGYNIFVSTFDRIKFVKVVLNDKFPIIEIDYLKQI---PVRKDDIQSKAVYGSILLR-TKEIFAHRKM-PEVQLNMVNIEDKGKLCDIVASTISSSKNDHQIVLETLNVKDRLKKVLELIYEELNLIEIQNKIAKGIQERLEKQQKEFFLKEQLKAIKAELGIGDKKSSDLEKLKTKLKALELKGEPLEVVEKELEKFSLLETSSAEYIVVRNYLELITELPWRDFKINFDKLDLQKSKKILDKTHYGMNEVKDRIIEYISVLKLRKTQKGAIILLVGPPGVGKTSIGAAIAKVLRTKFFRFSVGGMRDESEIK…	8e-175	527	1357	777	37.97	295	456	481	11	26	61.9	44562	1	2LIPALVRPDSIHVP3YG1IFVI1LIFVVLGIRSEDKSSDVMRK1LI1EY2NKSGHNKGKI1IA1VFTV-L-N-D-K-F-L-EQKMN1SN1DAEQNQPKIL-I-I-D-YASSKSDVI1RSIV1TVITVGDK1VIQKIKLIRN4TGVYKN1LF1ESGTSFVD1AIRKIF1EKYVIVELRNEDDK1-P-I-I-ELIEDAYILTK1VIL-P-D-1TV-REK1PDVIEQLSEK1LVSYRG1VIILALERF-STNKYE1KFLANHKR1IMS-3IQGLINTMSVQN2GDFKSG2AC1VIIV1ASNTLI1ISKSVKANEDRH1KIIV2ATVLSN2ED2EKMKLV1VEFLMIEYSE1ILSNVLLIQEVIEQKNRK1RASKRGVIKQREQRML2TQ1RK1YFYF1HK2…	N/A	N/A	N/A	N/A	N/A	N/A	N/A	N/A	92	92
CLIBASIA_02710	0	CLIBASIA_02710	Q8MPM3#PHI:8028#Tkt#5665#Leishmania_mexicana#loss_of_pathogenicity	Q8MPM3#PHI:8028#Tkt#5665#Leishmania_mexicana#loss_of_pathogenicity	0	0	Q8MPM3#PHI:8028#Tkt#5665#Leishmania_mexicana#loss_of_pathogenicity	Q8MPM3#PHI:8028#Tkt#5665#Leishmania_mexicana#loss_of_pathogenicity	20	664	5	646	KKMADAIRFLSMDAIENVNSGHPGLPMGMADVVTALFTQCMVFDPQCPYWPNRDRFVLSAGHGSMLYYALLYLLGYQDVTIEDIKNFRTIGSKTAGHPEYGSCAGIEATTGPLGQGIANAVGMAIAERKLREEF---GDVLIDHYTYVLVGDGCLMEGISQEAISFAGHLGLSKLIVLWDNNGISIDGPISLADSTDQYARFRASGWNTLSV-NGH-DHHAITSTLRKAQLSD-KPTMIACETVIGFGSPNRAGTNKVHGSALGQEEIKATRKALNWDLDPFF-IPDDIMKKWRLAGLRSSQTRADWQERLSSMKSSIRKE---FERRFSDALPDCFDNAFINLKKKFEHSKPMIATRKSSELVLEVVNDCLPELIGGSADLTGSNGTK--TSQMKAIS…	EKVANCIRCLAADIVQGGKSGHPGTPMGMAPMSAVLWTEVMKYNSQDPDWVDRDRFVMSNGHGCALQYALLHMAGY-NLTMDDLKGFRQDGSRTPGHPERFVTPGVEVTTGPLGQGIANAVGLAIAEAHLAATFNRPGYNIVDHYTYVYCGDGCLMEGVCQEALSLAGHLALEKLIVIYDSNYISIDGSTSLSFTEQCHQKYVAMGFHVIEVKNGDTDYEGLRKALAEAKATKGKPKMIVQTTTIGFGS-SKQGTEKVHGAPLGEEDIANIKAKFGRDPQKKYDVDDDVRAVFRMHIDKCSAEQKAWEELLAKYTAAFPAEGAAFVAQMRGELPSGWE-------AKLPTNSSAIATRKASENCLAVLFPAIPALMGGSADLTPSNLTRPASANLVDFS…	1e-173	514	1324	660	44.09	291	336	411	14	33	62.27	44562	1	KE1MV1DNAC2FC1SAMA1AIIVEQNGVGNK5LT5DPVMVSTAAV1FW1QECV1VKFYDNPS1CD1YD1PVND5LM1AN3SCMA1YQ4YHLMLA2Q-DNVL1IMED1IL1NG2TQID2KR1AP4YRGFSVCTAP1IV1AV14ML4RAKH1RAEAET1-N-R-P1DYVNLIIV6LYVC8IVSC3IL1FL4GA1SE4LIWY1NS1GY5PSIT2ASDFSTTEDQQCYHAQRKFYRV1SM1WFNHTVLISE1-K2HD-T1HYHEAGILTRSKTA1RAKE1QKLASTDK-G2TK2AVCQET1VT5P-NSRKAQ2NE4SAAP2QE1ED1KAANTIRKKAAKLFNGWR1LPDQPKFKFY-DIVPD2IVMRKAKVWF1LMAHGILDRKSC1QATERQAKDA1QE1RL…	N/A	N/A	N/A	N/A	N/A	N/A	N/A	N/A	96	96
CLIBASIA_03495	0	CLIBASIA_03495	A4VYE0#PHI:11091#GidA#1307#Streptococcus_suis#reduced_virulence	A4VYE0#PHI:11091#GidA#1307#Streptococcus_suis#reduced_virulence	0	0	A4VYE0#PHI:11091#GidA#1307#Streptococcus_suis#reduced_virulence	A4VYE0#PHI:11091#GidA#1307#Streptococcus_suis#reduced_virulence	5	614	8	623	SYDVIVIGGGHAGCEAAAVAAKLGASTALITHKTSTIGSMSCNPAIGGLGKGHLVREIDALDGLMGRVADAAGIQFRVLNVKKGPAVRGPRTQADRELYRLAMQREILSQENLDVIQGEVAGFNTEKNIISSIVMQDNSMIRCSTVVLTTGTFLRGVIHIGKLKIPAGRMGDSPSNSLFNSFMKFDFDTGRLKTGTPARLDGKTIIWDKTEKQFADERLIPFSFMT---DKITNRQIECGITRTNLETHRIIMENIKHSAIYSGDIKSYGPRYCPSIEDKIVRFGERNGHQIFLEPEGLNTDVVYPNGISTALPEEIQHQFIRTIPGLEKVNIIRPGYAIEYDYINPKELFPTLETKKISGLFLAGQINGTTGYEEAAAQGLVAGINSARKSNKLDCIC…	NYDVIVIGAGHAGVEAGLAASRMGCKTLLATINLDMVAFMPCNPSIGGSAKGIVVREIDALGGEMGRNIDKTYIQMKMLNMGKGPAVRALRAQADKAEYASEMKRTVERQENLTLRQTMIDEILVEDGKVIGVRTATNQKFSAKAVVVTTGTALRGEIIIGDLKYSSGPNNSLASITLADNLKELGLEIGRFKTGTPPRVNARTINYEDTEIQPGDEKPNHFSFLSKDEDYLLD-QIPCWLTYTNATSHEIINSNLHRAPMFSGIVKGIGPRYCPSIEDKIVRFADKERHQLFLEPEGRNTDEIYVQGLSTSLPEDVQQDLIHSIKGLENAQMMRTGYAIEYDMVMPHQLRATLETKKISGLFTAGQTNGTSGYEEAAGQGIVAGINAALKVQGKPELI…	4e-169	499	1286	617	43.6	269	340	379	4	8	61.43	44562	1	SN7GA4CV2AGALVA1ASKRLM1ACSK1AL1IA1HIKNTLSDTMIVGASF1SP3AS3LSGA2HILV7DG1LE3VNAI1AKATGY2FMRKVM2VMKG6GAPL1TA3RKEALE1RALSAE1QK1ETIVLESR4DTVLIR1GTEMVIADGEFINLTV1KDNGIKIVSISGIVVRMTQADT1SQMKIFRSCASKTA2LV4FA3VE1HI2KD2IYPSAS1RPMNGNDSSLPA1NIST1FANDSNFLMKKEFLDGFLDETI2LF5AP1LVDNGAKR2INWYDEKD2KI1FPAG2RKLPINPH3MLTS-K-D-E1KYILTLNDR-2EP1GWIL1RY2LAETTS1RE2MNES1ILKHHRSAAPIMYF2DIIV1SGYI15GAEDRKNEGR2IL6LR3VEVI1PVNQ1I…	N/A	N/A	N/A	N/A	N/A	N/A	N/A	N/A	97	97
CLIBASIA_03870	0	CLIBASIA_03870	D4I229#PHI:7094__PHI:7438#ClpV-2__EAMY__3222#552#Erwinia_amylovora#reduced_virulence__unaffected_pathogenicity__increased_virulence_(hypervirulence)	D4I229#PHI:7094__PHI:7438#ClpV-2__EAMY__3222#552#Erwinia_amylovora#reduced_virulence__unaffected_pathogenicity__increased_virulence_(hypervirulence)	0	0	D4I229#PHI:7094__PHI:7438#ClpV-2__EAMY__3222#552#Erwinia_amylovora#reduced_virulence__unaffected_pathogenicity__increased_virulence_(hypervirulence)	D4I229#PHI:7094__PHI:7438#ClpV-2__EAMY__3222#552#Erwinia_amylovora#reduced_virulence__unaffected_pathogenicity__increased_virulence_(hypervirulence)	160	830	195	851	ALKKYCRDLTEEARNGKLDPVIGRDDEMRRAIQVLSRRTKNNPVLIGDPGVGKTAIIEGLASRIINGDIPESLKGKRLMALDMGALIAGAKFRGEFEERLKSLLCEIRSEDGEIILFIDELHVLVGAGKTDGAMDASNLLKPSLARGELHCIGATTLDEYRKYIEKDPALARRFQSLLVGEPTVTDTISILRGLKERYEQHHKVRISDSALVSAAVLSNRYITDRFLPDKAIDLMDEASARVRMQIDTKPEVLDELDRRIICLKIEKEALKKE---KDSFSKGRLIELEKELSSLEEKSHSLTLRWQEGQRKILYVADLKKRLESMRNELAIAQRQGHFERAGELAYGLIPKTEKELDEAEKADSTAEDMVQEVVTSDNIANIVSRWTGIPVDKMLESD…	ALDKFTLDVTAKARAGQIDPIFGRDNEIRQMVDILSRRRKNNPILVGEPGVGKTALIEGLALRISEGNVPDSLKNVSLRTLDMGLLQAGAGVKGEFEQRLKNVIDAVQNSPTPVLLFIDEAHTLIGAGNQAGGADAANLLKPALARGELRTIAATTWSEYKQYFERDAVLERRFQRVKVDEPDEQTACLMLRGLKSRYARHHGVHITDEAVKAAVSLSRRYIPGRQLPDKAVDLLDTASARVRMSLDTLPEELTRLKAQITALDMEAQALREDTALRNHPHGDRLAQIEQQTNALGDQLAQFDMQYLA--EKALTRQLLEVRQDSNRQEDSIGLQQQLSDLQGS-----APLMSIDVD------------------VRTVATVIADWTGVPLTSLLKDE…	5e-169	515	1327	684	41.37	283	361	419	8	40	61.26	44562	1	2KD1YFCTRL1LV1EAEK2NA1KQLI2VIIF3DN1MI1RQAMIVQDVI4TR4VI1IV1DE7IL5SL2ISNE1DNIV1ED3GNKVRS1MRAT4AL1IQ3KGFVRK4EQ3SNLVLICDEAIVRQSNESDPGTEPIVIL5LA1VT1VI3KNTQDA1AGMA2SA5SA6HRCT1GA3LWDS2RKKQ1IF1KR1PAAV1AE4SRLVLK1GD2TDVETQDTTAICSLIM5ES2EAQR2KG1RH1ST1SE1LVVKSA1AVVS2NR3TPDG1FQ5IV2ML1ET7QSIL2KL2VE1DTER1DKRARQ1ITCA1KDIM1KAEQ2KRKEED-T-A-LKRDNSHFPSHKGGD2IAEQLI1KQEQLTSNSA1EGEDKQSLHASQLFTDLMRQWYQLEAG-Q-RE1IA1YTVRA…	N/A	N/A	N/A	N/A	N/A	N/A	N/A	N/A	79	79
CLIBASIA_01495	0	CLIBASIA_01495	J9VUY6#PHI:6871#Gua1#5207#Cryptococcus_neoformans#loss_of_pathogenicity	J9VUY6#PHI:6871#Gua1#5207#Cryptococcus_neoformans#loss_of_pathogenicity	0	0	J9VUY6#PHI:6871#Gua1#5207#Cryptococcus_neoformans#loss_of_pathogenicity	J9VUY6#PHI:6871#Gua1#5207#Cryptococcus_neoformans#loss_of_pathogenicity	10	519	13	543	VLIIDFGSQFTQLIARRVRESKVYCEVIAFKNALDYFKEQNPQAIILSGSPASSLDIDSPQIPKEILESNIPLLGICYGQQIMCQSLGGKTKNSQSREFGRAFIEI-----KKNCSLLKGM-WEKGSKQQVWMSHGDQVEHIPEGFEVIASSDSTPFAFIADEKRKYYAVQFHPEVVHTVGGSQLIDNFVHHVAGIQDNWVMSSYHKEIVSRIKEQVGNE-RVICAVSGGVDSTVAAFLIYEAIGINLTCVLVDHGFMRKNEVENIISLFKGYPNFPLRVVDASERFIRKLKNIVDPETKRKVIGQLFIEVFEE------------------EAKKIGGAQFLGQGTLYPDVIESISFFGGPSSIIKSHHNVGGLPEHMDMKLVEPLKELFKDEVRLLG…	ILILDFGSQYSHLITRRCRELNVYCEMLPCTQKISELSWK-PKGIILSGSPYSVYAPDAPHVDPDVFTLGVPILGICYGLQEIARVHGGTVDAHTHREYGYAKIEVVKTGKKDQDALFEGIEMEADGGLQVWMSHGDQLTSLPPNFVTIASTPTSPFTSVAHESKPIYGVQFHPEVSHSPRGKEVIAAFVKNVCGVRDGWSMESFIPKEIARIRQICGEKGQVIGAVSGGVDSTVAAKLMHEAIGDRFHAIMVDNGVLRKDEAKKVHKMLTVDLGVNLTVIDASELFLARLKGVEDPERKRKIIGNTFIEVFEAEAAKLEAAAEKELAEKGGEAK--GKIEWLLQGTLYPDVIESISF-KGPSATIKTHHNVGGLLEDMKLKLIEPLRELFKDEVRALG…	3e-168	489	1260	535	48.97	262	244	350	7	29	65.42	44562	1	VI2IL5FYTSQH2AT2VC2SLKN4VMILAPFCKTNQAKLIDSYEFLKSEWQKN-1QKAG7AY1SVLYDAIP1SA1QHIVPDKPEDIVLFETSLNGIV1LI6QL1IEMICAQRSVLH2KTTVKDNASHQTSH2FY1RY1FK2IV-V-K-T-G-K1KDNQCDSA1LFKE1MI-EWM1KAGDSGKGQL9VLETHSIL1EPGN1EVVT3STDPSTTS2ATFSIV1DH1KSRKKPYI1AG7VS1TSVPGR1SKQELV1DANA2HKHN1AC1IVQR1NG1VS1SE1YFHIKPEKIEVISA2KREQQIVC1NEEK-GRQ2CG12FK1IMYH4IDNRLFTHCAVILM2HN1FVML2ND1VAEKNKIVIHSKLMFLKTGVYDPLNGFVPN1RT1VI4RL1ILRAKR2N…	N/A	N/A	N/A	N/A	N/A	N/A	N/A	N/A	98	98
CLIBASIA_01060	0	CLIBASIA_01060	P0DJP3#PHI:5255#SecA2#1639#Listeria_monocytogenes#reduced_virulence__increased_virulence_(hypervirulence)	P0DJP3#PHI:5255#SecA2#1639#Listeria_monocytogenes#reduced_virulence__increased_virulence_(hypervirulence)	0	0	P0DJP3#PHI:5255#SecA2#1639#Listeria_monocytogenes#reduced_virulence__increased_virulence_(hypervirulence)	P0DJP3#PHI:5255#SecA2#1639#Listeria_monocytogenes#reduced_virulence__increased_virulence_(hypervirulence)	46	807	36	750	LANKTSEFKERINNGETLDDLLVPAFAVVREVARRTLGMRPFDVQLLGGMILHKGCVAEMKTGEGKTLAAVLPVYLNALSGKGVHVVTVNDYLARRDSNTMSAIYKFLGLSTGVVFHDLSDDKRRAAYACDITYITNNELGFDYLRDNMQYRRVDMVQRGHNFAIVDEVDSIFIDEARTPLIISGPVEDHSDLYRTIDSIIIQLHPSDYEIDEKQRTVHFSEKGTERIEELLHGENLLKSGGLYSFENVAIVHLINNALKSHTLFLRNRDYIVNRDEVVIIDEFTGRMMPGRRYSDGQHQALEAKERVKIQPENQTLSSITFQNYFLKYRKLSGMTGTASTEAEELANIYNLDVIEVPTNVPVIRIDEHDEIYRTSEEKYAAIIAEIIDSHKKGQPVLV…	LCEQTNFWREKFKTKPMTDRDKINIFALAREAASRIIGLDAVVVQLIGALVLGDGKVAEMKTGEGKTLMSLFVMFIEVMRGNRVHLVTANEYLARRDREEIGQVLEYLGVSVALNESGLDIAQKKAIYTADVIYGTASEFGFDYLRDNMVRQKEDKVQSGLDFVLIDEADSILIDEARTPLLISDRKEEDLSLYHTANKLVKKMMKDDYEMEEHKRFVWLNDAGIEKAQKFWGVESL------YSAEAQSELRITMLLMRAHFLMHKDKDYVVLDDEVLIIDPHTGRALPGRRFNDGLHQAIEAKEGVEVKEESRTLATITIQNYFRMYKKISGMTGTAKTEEEEFRQIYNMDVVVIPTNLRVNREDMQDDIFYTKKEKGRAIVYEVSWRYEKGQPTLI…	2e-167	509	1310	771	38.65	298	408	452	11	65	58.63	44562	1	1ACNEKQ1SNEFFWKR1RKIFNKNTGKEPTMLT1DRLDLKVIPNAI2VLVA2VA1RS1TILI1MLRDPAFVDV3LI1GAMLIV1HGKD1CK12AMASVLLFPVVMYFLINEAVLMSR1KNGR2VL2VA1DE6SRNETEMISGAQIVYLKEFY2LV1TVGAVLVNFEHSDG1SDDIDAKQRKRK1AI1ATCA1IVTI1IG1NANS1LF9QVYRRQRKVE1MK2RS1HLND1AVILVI2VA3FL8IL2GDPRVK1DEHDSLDS2RH1IADNSKILIVIKQKLMHMPKSD3IMDE1KHQK1TF1HWFLSNEDKA1TI1RKIAEQEKLFLWHGGV1NS1L-K-S-G-G-L-2FA1NAVQASIEVLHRLIITNMNLALLMKRSA1TF1FMLHRKNDRK2IV1NL…	N/A	N/A	N/A	N/A	N/A	N/A	N/A	N/A	86	86
CLIBASIA_04210	0	CLIBASIA_04210	D4I4L2#PHI:9308#GlmS#552#Erwinia_amylovora#reduced_virulence	D4I4L2#PHI:9308#GlmS#552#Erwinia_amylovora#reduced_virulence	0	0	D4I4L2#PHI:9308#GlmS#552#Erwinia_amylovora#reduced_virulence	D4I4L2#PHI:9308#GlmS#552#Erwinia_amylovora#reduced_virulence	1	608	1	609	MCGIVGIVGRESVGERLFKALKRLEYRGYDSSGMATI-CDGKIQCVRAQGKLSELEKELNKKPLKGNIGIAHTRWATHGLPNKENSHPHCIEGIAVTHNGIIENFSRLKKEHFSSQQVFLTETDTEVIACLLEKFIKNGSSKKETMQKLMQCLTGSYSIAVIFEDDPHSIIVARKGPPLIIGHGEGEMFVGSDVTALTLLTDKVTYMEDGDWAIIRNSGLTIYDSQGYEIERPIQIVQIAPFLIG-KGNYRHFMEKEIYEQPEAISRVLSHYINLSDHTIIPNIFNYD--FANISGLLVSSCGTSYLAGLVGKFWFERLARLKVEIDVSSEFRYRDFVYSSKWASLFISQSGETADTLASLRYMRTQGLTIGSLV--NVLESTIARESDFIFPIKAGPE…	MCGIVGAVAQRDIAEILLEGLRRLEYRGYDSAGLAVVDANGQATRLRRVGKVSNLTAAAENTALAGGTGIAHTRWATHGEPSESNAHPHISGEIIIVHNGIIENHEPLRELMTGRGYTFTSETDTEVVAHLVHWEQQNGGSLHEVVQRVIPQLRGAYGMVILDSRDPATLIAARSGSPLVIGRGVGENFIASDQVALLPVTRRFIYLEEGDIAQITRRNVIIVDRSGEVVQRR-EIESNTQYDAGDKGAYRHYMQKEIYEQPVAIKNTLSGRFSHGEVDFSELGANADSLLANVEHIQIVACGTSYNSGMVSRYWFESLANVPCDVEIASEFRYRKSAVRKNSLLITLSQSGETADTLAALRLSKELGY-LGSLAICNVAGSSLVRESDLALMTKAGTE…	7e-166	489	1260	615	43.41	267	335	380	10	13	61.79	44562	1	6IA1GARQERSDVIGA1RI1FLKEAG1KR9SA1ML1TVIV-DCADN1KQIAQTCRVL1ARQV2LV1EN1ETKAEALANEKNKTPA1KA1NGIT11LE1NSKEES1SA3CIISEGGE1AIVITV7FHSERP1KRKEELHMFTSGSRQGQYVT1LTTS6IV1CH1LVEHKWFEIQKQ2SG1KLKH1TVMV1KRLVMIQPCQ1TR1SA1SGIMAVVIILFDESDR2HASTIL1VA2KS1PS2IV2HR1EV2MN1VIGA2VQTV2TLLPLV1DRKRVFTI1ML1DE2WI1IQ1RTNRSRGNLVTI1YV1SRQS1YEEVIVEQ1PRI-QE1VEQSINATPQFYLDIA1-D2NA3FY1EQ7EV2SKRNVT2HGYRIFNSLHSGDEHVTDIFISPENLIGFA1YA1…	N/A	N/A	N/A	N/A	N/A	N/A	N/A	N/A	100	100
CLIBASIA_03930	0	CLIBASIA_03930	E0SN64#PHI:8579#GuaB_(Dda3937_00004)#204038#Dickeya_dadantii#reduced_virulence	E0SN64#PHI:8579#GuaB_(Dda3937_00004)#204038#Dickeya_dadantii#reduced_virulence	0	0	E0SN64#PHI:8579#GuaB_(Dda3937_00004)#204038#Dickeya_dadantii#reduced_virulence	E0SN64#PHI:8579#GuaB_(Dda3937_00004)#204038#Dickeya_dadantii#reduced_virulence	13	489	8	484	ALTFDDVLLRPEFSNVLPRDIDISTRIAKDFTLNLPIMSAAMDQVTDSRLAIAMAQAGGLGVIHRNFSPSEQVAQVHQVKKFESGMVVNPVTISPYATLADALALMKKYSISGIPVVESDVGKLVGILTNRDVRFASNAQQAVGELMT--RNLITVKKTVNLENAKALLHQHRIEKLLVVDDDGCCIGLITVKDIERSQLNPNATKDSKGRLRVAAAVSVAKDIADRVGPLFDVNVDLVVVDTAHGHSQKVLDAVVQIKKNFPSLLVMAGNIATAEGALALIDAGADIIKVGIGPGSICTTRVVTGVGCPQLSAIMSVVEVAERAGVAIVADGGIRFSGDIAKAIAAGSACVMIGSLLAGTDESPGDIFLYQGRSFKSYRGMGSVAAMERGSSARYSQ-…	ALTFDDVLLVPAHSTVLPNTADLSTQLTQRIRLNIPMLSAAMDTVTESGLAIALAQEGGIGFIHKNMPIERQAEEVSRVKRHESGVVVDPQTVTPETTLRQVKQLTERNGFAGYPVVTTG-NELVGIITGRDVRFVTDLDRPVSAVMTPKERLVTVKEGEARDVVLQKMHERRIEKALVVDTQFRLVGMITVKDFQKAERKPNACKDEHGRLRVGAAVGAGAGNEERIDALVAAGVDVLLIDSSHGHSEGVLQRIRETRAKYPDLQIIGGNVATGAGARALAEAGVSAVKVGIGPGSICTTRIVTGVGVPQITAIADAVDALEGTGIPVIADGGIRFSGDIAKAIAAGAACVMVGSMLAGTEESPGEIELYQGRAFKSYRGMGSLGAMSKGSSDRYFQS…	5e-165	478	1231	480	52.92	254	220	337	4	6	70.21	44562	1	9RV1EAFH1NT3RNDTIA1IL2RQILATKQDRFITR2LI1IMML5QT2DE1RG4ML2AE2LI1VF2RK1FMSPPISEER1VAAEQE1HSQR2KRFH3MV2ND1VQ1IVST1YEAT2ARDQAVLKAQ1MTKEKRYNSGIFSA1IY3ETSTDGV-GNKE4LI1NG5AVSTNDALQDQRAP1GSEALV2-P-KRENR1IV3KETGVENALREDNVAVKLAQLKLM1QEHR4LA4DTDQGFCRCLIV1LM5IFEQRKSAQELRNK3TC2SEKH5AG3SGVAAGKADGINAEDE1VIGDPA1FVDAVANG2LVVLVLVI1TSAS4QEKG2DQARVIVRQEITKRKANKFY1SD1LQVIMIAG2IV2AGEA2LR2IADE2AVDSIAIV13VI5CV2LIST2MASD…	N/A	N/A	N/A	N/A	N/A	N/A	N/A	N/A	97	97
CLIBASIA_04630	0	CLIBASIA_04630	A0A0F6AZ29#PHI:7216#STM14_1007#28901#Salmonella_enterica#reduced_virulence	A0A0F6AZ29#PHI:7216#STM14_1007#28901#Salmonella_enterica#reduced_virulence	0	0	A0A0F6AZ29#PHI:7216#STM14_1007#28901#Salmonella_enterica#reduced_virulence	A0A0F6AZ29#PHI:7216#STM14_1007#28901#Salmonella_enterica#reduced_virulence	8	554	10	561	HNKDVFEYDVVIIGAGPAGLAAAIRCK-QIN---PHLSVVILEKSAEVGAHILSGAIIDPIGIDSLLPRWREDKGHPFHTVVKRDLYWFLNAQRSIQIPHFCLPDFMDNKEHYIVSLGQVCRWLKNKAEALGVEIYCGFTATEIYYGKKGEALGILTGEKGKNYDGTQGKHYIAPMLLLSKYMLVGEGACGSLTRQLIERYSLMDGRQPQKFGLGIKELWKIKPQYHRRGLALHSIGWPLDMNTSGGGFVYHFDDNLVSIGFVLHLDYRNPWISAYEELQRFKTHPDIRIIFTEGERLEYGARVISEGGWQSVPKLSFPGGSLIGCAAGFVNLLRIKGSHNAIISGMLAAEKIVERLSNGKKHDDPIEIEDSWRQTQIGKDLWIIRNIKPLLSRFGVFI…	QSRETIECDVLIVGAGPAGLSAALKLKLQANDAGKELSIIVLDKGAEPGSHILSGAVMDPRALNELIPDWQE-RGAPIKQPVTQDKLLLLTNEKCINLPDALIPDNFRNHGNFIVSLGNLIKWLAGQAETSGVDIYAGFSATEILYDQDTNIIGVVTGDMGRHRDGSKKEGFLSGIEILAKYTIFAEGARGSLAKELIKKFHLDTGKAPQSFSIGIKELWEVPSDQSHPGLVIHTTGWPLDKESFGGGFLYHLNDNKIALGLVVGLDYSNPWLSPFQEMQRLKTHPSIRKYIDRGKRIGYGARAINNGGIASMPDPCLPGGLLIGCNAGTLNASRIKGIHTAIKSGMIAADAIFNALLDNRKNDILTEYQTLLRQSWLWQELENGSNFKPWFKK-GRVI…	5e-165	483	1244	554	43.5	241	304	363	6	9	65.52	44562	1	HQNSKRDEVTFI1YC2VL1IV7AS2ILRKCL1-L1IA1-D-A-GPKHE2VIVIIV1ED1SG2VP1AS6IVIM2IRGAILDNSE1LI1RD1RQ1D-KR1HA1FIHKTQVP1KTRQ1LKYLWLFL1NTANQERKSC1QNIL1HDFACLLI2FNMFDR1KHEGHNYF5QNVLCIRK2KANGKQ2ATLS2ED2CA2TS4YL1GDKQKDGTENAILI1IVLV2EDKM1KRNHYR2TSQKGKKEHGYFILASPGMILELI1SA2MTLIVFGA3CR3TARKQE2EKRKYFSH1MDDT1RKQA2KS1GSLI6KEIVKPPSQDYQHSRHRP2AVLI1STIT5MKNETSSF4VL2FLDN2LKVISAIL1FL1LVHG3RS3IL1APYFEQ1LM2FL4DS2IKIYFITDER…	N/A	N/A	N/A	N/A	N/A	N/A	N/A	N/A	99	99
CLIBASIA_00780	0	CLIBASIA_00780	A6QHK8#PHI:3004#ClpX#1280#Staphylococcus_aureus#reduced_virulence	A6QHK8#PHI:3004#ClpX#1280#Staphylococcus_aureus#reduced_virulence	0	0	A6QHK8#PHI:3004#ClpX#1280#Staphylococcus_aureus#reduced_virulence	A6QHK8#PHI:3004#ClpX#1280#Staphylococcus_aureus#reduced_virulence	15	408	11	403	LYCSFCGKSQHEVRKLIAGPTVFICDECVELCMDIIREENKSSITKSHEGIPNPQEILRVLDEYVIGQGQAKKVLAVAVHNHYKRLAH-SSKSSNVELAKSNILLVGPTGCGKTYLAQTLARIIDVPFTMADATTLTEAGYVGEDVENIILKLLQAADYNVERAQRGIVYIDEVDKISRKSDNPSITRDVSGEGVQQALLKIMEGTIASVPPQGGRKHPQQEFLQVDTTNILFICGGAFAGLDRIISAR-GEKASIGFSAVVKDSDNRPVGEVLRNLESEDLVKFGLIPEFIGRLPVLATLEDLDENSLIRILSEPKNALIKQYQCLFDMEDVELVFHEDALREIARCAIAHKTGARGLRSILEKILLDTMFELPMLKGVSSVIISDDVVKGKACP	LKCSFCGKDQDQVKKLVAGSGVYICNECIELCSEIVEEELAQNTSEAMTELPTPKEIMDHLNEYVIGQEKAKKSLAVAVYNHYKRIQQLGPKEDDVELQKSNIALIGPTGSGKTLLAQTLAKTLNVPFAIADATSLTEAGYVGDDVENILLRLIQAADFDIDKAEKGIIYVDEIDKIARKSENTSITRDVSGEGVQQALLKILEGTTASVPPQGGRKHPNQEMIQIDTTNILFILGGAFDGIEEVIKRRLGEKV-IGFSS--NEADKYDEQALLAQIRPEDLQAYGLIPEFIGRVPIVANLETLDVTALKNILTQPKNALVKQYTKMLELDDVDLEFTEEALSAISEKAIERKTGARGLRSIIEESLIDIMFDVPSNENVTKVVITAQTINEETEP	1e-164	472	1215	396	57.58	228	163	307	4	5	77.53	44562	1	1YK6SD1HDEQ1RK2IV2PSTG1FY2DN2VI3MSDE1IVRE2NLKASQSNITTSKESAHMETGEIL1NT1QK2LMRDVH1DN6GEQK3VS5HY5LIAQHQ-LSGSP1SESDND3AQ4LA1VI4CS3YL6RKITILDN3TAMI4TS8ED5IL1KR1LI4YFNDVIEDRK1QERK2VI1IV2VI3SA3DE1PT18ML3IT12QN2FMLI1VI8CL4AD1LIDEREIV1SKAR1-L3AVS-4ASV-V-KNDESA1NKRYPDVEGQEAVL1RANQLIERSP3VQKAFY9LV1VILV1TN2DT2EVNTSA1IKRN2STEQ5IV3QTCKLMFLDEMLED2ED1VE1HT1DE2RSEA1ASRECK2AEHR10LI1KEIS1LI1TI2EDLV1MSLNKEGN1STSK1IV…	N/A	N/A	N/A	N/A	N/A	N/A	N/A	N/A	93	93
CLIBASIA_00385	0	CLIBASIA_00385	A3M645#PHI:10380#RecA#470#Acinetobacter_baumannii#reduced_virulence	A3M645#PHI:10380#RecA#470#Acinetobacter_baumannii#reduced_virulence	0	0	A3M645#PHI:10380#RecA#470#Acinetobacter_baumannii#reduced_virulence	A3M645#PHI:10380#RecA#470#Acinetobacter_baumannii#reduced_virulence	11	333	4	324	DKSKALEAALSQIQRVYGKGAIMQLGSQGSIFEGIEVVSSGSLGLDIALGIGGFPKGRIVEIYGPESSGKTTLALHTIAQSQKTGGTCAFVDAEHALDSIYARKLGVDLKNLLISQPDTGEQALEITDMLVRSGAVDIIVIDSVAALTPRAEIEGDMGESLPGMQARLMSQALRKLTSSISRSKCILVFINQMRMKIGVMFGSPETTTGGNALKFYSSVRLDIRRVGSIKDKDSITGNQTRVKVVKNKMASPFKQVEFDIMYGEGISFFGELIDLGVKASIVDKSGAWFSFKGQRLGQGRENSKIFLRENIEIAENIESLLRQ	NKSKALQAALSQIEKQFGKNTVMRLGD--NTVQAVEAVSTGSLTLDIALGIGGLPKGRIIEIYGPESSGKTTMTLQAIAQCQKSGGTCAFIDAEHALDPQYARKLGVDIDNLLVSQPDNGEQALEIADMLVRSGAIDLIVVDSVAALTPKAEIEGEMGDSHMGLQARLMSQALRKITGNAKRSNCMVIFINQIRMKIGVMFGSPETTTGGNALKFYASVRLDIRRIGQVKEGDEIVGSETKVKVVKNKMAPPFKEAIFQILYGKGTNQLGELVDLAVQQDIVQKAGAWYSYQGNKIGQGKNNVIRYFEENTQIAEEIERNIRE	8e-163	462	1190	323	66.87	216	105	270	1	2	83.59	44562	1	DN5EQ6QERKVQYF2GNATIV1QR2SDQ-G-SNITFVEQGAIV1VA2ST3GT9FL5VI12LMAT1HQTA3SC2TS6VI7SPIQ8LIKD3IV4TN7TA8VI1IL2IV8RK5DE2ED1LHPM1ML11LI1SGSNIASK2KN1IMLVVI4MI23SA8VI1SQIV1DEKG1SE1TV1NSQE1RK9SP3QEVAEI1DQ1ML2EK1ITSNFQFL3IV2GA1KQAQSD2DQ1SA3FY1FYKQ1QNRKLI3RKEN1SVKIIRFYLFRE2ITEQ3NE2SRLNLI1QE	N/A	N/A	N/A	N/A	N/A	N/A	N/A	N/A	89	89
CLIBASIA_03870	0	CLIBASIA_03870	D4I0P4#PHI:7106__PHI:7393#ClpV-1__EAMY__3005#552#Erwinia_amylovora#unaffected_pathogenicity__increased_virulence_(hypervirulence)__reduced_virulence	D4I0P4#PHI:7106__PHI:7393#ClpV-1__EAMY__3005#552#Erwinia_amylovora#unaffected_pathogenicity__increased_virulence_(hypervirulence)__reduced_virulence	0	0	D4I0P4#PHI:7106__PHI:7393#ClpV-1__EAMY__3005#552#Erwinia_amylovora#unaffected_pathogenicity__increased_virulence_(hypervirulence)__reduced_virulence	D4I0P4#PHI:7106__PHI:7393#ClpV-1__EAMY__3005#552#Erwinia_amylovora#unaffected_pathogenicity__increased_virulence_(hypervirulence)__reduced_virulence	5	835	12	850	KYSDLMRNVLQSAQTYALAQGHQNLVPEHVLHIFLEDEQGAVYSLIQCSGGDIAQLKDYNQTVLSKIPKVTGGGAQVYLSQPLAVILSKSEEIAKKSGDSFVTAEKFLLAMVMETGGIGESLKKCGLKFSRLEESIKKLRKGRV-ADSVNAEQGFDA--------------LKKYCRDLTEEARNGKLDPVIGRDDEMRRAIQVLSRRTKNNPVLIGDPGVGKTAIIEGLASRIINGDIPESLKGKRLMALDMGALIAGAKFRGEFEERLKSLLCEIRSEDGEIILFIDELHVLVGAGKTDGAMDASNLLKPSLARGELHCIGATTLDEYRKYIEKDPALARRFQSLLVGEPTVTDTISILRGLKERYEQHHKVRISDSALVSAAVLSNRYITDRFLPD…	KLDTLLFTSLESATAFCKLRGNPYVELVHWLHQLMQQQSGDLQQLIRHFSLDEEALTRDIVAALDRLPR--GASAVSDLSEHIDSAVERAWVYASLKFGVQQIRGGHLLTGLLKTFNLANLLKGISPQFSRVSVDVLLEQFDRVFGDSKEARQVSAAPQTPGGEVPQQQGTLAQYAQDLTARARDGKIDPVAGRDQEIRQMVDILMRRRQNNPLLTGEAGVGKTAVVEGLALRIAAGDVPEPLQQVQLWLLDIGMLQAGAGMKGEFEARLQALINEVQSSPTPIVLFIDEIHTLVGAGGQQGTGDAANLLKPALARGQLRTIGATTWAEYKKYIEKDPALTRRFQTVQVHEPDEEKALLMLRSTVSPLEQHHRILLLDEAVAAAVKLSHRYIPARQLPD…	4e-162	497	1279	858	38	326	486	487	12	46	56.76	44562	1	1YLSDDT1MLRFNTVS1QE2QTTAYFACLKALQR1HNQPNYLVVEPLEV1VW2IQFLLMEQDQEQQS1ADVLYQSQ2QRCHSFGSGL1IEAEQA1KTDRYDNIQVTAVA1SDKRIL1KRV-T-1GAGS1QVVSYD2QEPHLIADVSIALVSEKRSAEWEVIY1KSKLSKGFDGSVFQVQTIAREGKGFH2ATMGVLMLEK1GFGNILGAENSL2KGCIGSLPKQ3LVESEVSDIVKLKLLERQKFGD2-FAG2VKNE1ER1GVFSDA1-P-Q-T-P-G-G-E-V-P-Q-Q-Q-G-T1KAKQ1CARQ3EAER2ND2LI3IA3DQ1MI1RQAMIVQDVI1SM2TRKQ3VL1IT1DEPA6IVIV4SL2IANA2IV2SP1KQGQKVRQ1MWAL2MI1AM1IQ3…	N/A	N/A	N/A	N/A	N/A	N/A	N/A	N/A	97	97
CLIBASIA_02160	0	CLIBASIA_02160	Q6NF92#PHI:11203#FtsH#1717#Corynebacterium_diphtheriae#unaffected_pathogenicity	Q6NF92#PHI:11203#FtsH#1717#Corynebacterium_diphtheriae#unaffected_pathogenicity	0	0	Q6NF92#PHI:11203#FtsH#1717#Corynebacterium_diphtheriae#unaffected_pathogenicity	Q6NF92#PHI:11203#FtsH#1717#Corynebacterium_diphtheriae#unaffected_pathogenicity	95	591	118	611	LLSYLGSWFPLVLVVLVWMFLMRQIQGGGARGAMGFGK--SKAKLLSGNVGSVTFKDVAGVDEAKEDLQEIVDFLCDPQKFKRLGGRIPHGVLLVGPPGTGKTLLARAVAGEANVPFFTISGSDFVELFVGVGASRVRDMFEQAKNNSPCIVFVDEIDAVGRHRGIGLGGGNDEREQTLNQLLVEMDGFESSEGVILIAATNRPDVLDAALLRPGRFDRQITVPNPDIVGREHILMVHSRNVPLAPNVILKTIARGTPGFSGADLRNLVNEAALMAARRNRRLVTMQEFEDAKDKILMGAERRSTAMTEEEKKITAYHEAGHAVVACHVPKADPLHKATIIPRGRALGMVMQLPEADRHSTTYVWMTSRLTILMGGRVAEEFTFGEDNVTSGAMSDIEY…	MLSYI---LPMLLMFGIIMFIFSRMQGGQGGIGGMFGFGGSRAKELDKDMPTNTFADVAGADEAIDELHEIKDFLEDPTRYEALGAKIPRGVLLYGPPGTGKTLLARAVAGEAGVPFYSISGSDFVEMFVGVGASRVRDLFKQARENSPCIIFIDEIDAVGRQRGSGMGGGHDEREQTLNQMLVEMDGFGDREGVIIMAATNRPDILDPALLRPGRFDRQIPVTNPDLKGREQILRVHAKGKPFAKDADITALARRTAGMSGADLANVLNEAALLTARIGGNVITADALEEATDRVIGGPRRSSKVISEKEKKVTAYHEGGHTLSAWALKNIERVYKVTILARGRTGGHAMTAQEDDKGMYNRDELYARLVFAMGGRAAEELVFGEP--TTGASADIEQ…	9e-161	485	1248	499	51.9	259	233	342	3	7	68.54	44562	1	LM3LIG-S-W-FL1LMVL1VMVFLGVIWI2LIMFRSQRIM3GQAGRGGIAGMGGM2KF-G-G1KR2LE1SDGKNDVMGPSTVN2KA4VA3KIEDDE1QH2VK3CE2QTKRFYKERA2GARK2HR4VY18NG3FYTS8LM11ML1EK2KRNE5VI1VI8HQ2IS1LM3NH9LM7EGSDSR4LIIM7VI2AP12TP1PT3ILVK3HQ2MR2SARKNGVK1LF1PKNDVAIDLIKTTAIL2GR1PA1FM5RA1LVVL5MLAT2RINGRGRNLVVI1MAQDEAFL1DE1KT1KRIVLIMG1APER1RS1TKAVMITS1EK3IV5AG2ATVLVS1CWHAVLPKKNAIDEPRLVHY1AV2ILPA3ATLG1MHVA1QTLAPQ1AD1RKHGSMTYTNYRVDWEMLTY…	N/A	N/A	N/A	N/A	N/A	N/A	N/A	N/A	77	77
CLIBASIA_03930	0	CLIBASIA_03930	D4HYB2#PHI:9306#GuaB#552#Erwinia_amylovora#reduced_virulence	D4HYB2#PHI:9306#GuaB#552#Erwinia_amylovora#reduced_virulence	0	0	D4HYB2#PHI:9306#GuaB#552#Erwinia_amylovora#reduced_virulence	D4HYB2#PHI:9306#GuaB#552#Erwinia_amylovora#reduced_virulence	13	489	8	484	ALTFDDVLLRPEFSNVLPRDIDISTRIAKDFTLNLPIMSAAMDQVTDSRLAIAMAQAGGLGVIHRNFSPSEQVAQVHQVKKFESGMVVNPVTISPYATLADALALMKKYSISGIPVVESDVGKLVGILTNRDVRFASNAQQAVGELMT--RNLITVKKTVNLENAKALLHQHRIEKLLVVDDDGCCIGLITVKDIERSQLNPNATKDSKGRLRVAAAVSVAKDIADRVGPLFDVNVDLVVVDTAHGHSQKVLDAVVQIKKNFPSLLVMAGNIATAEGALALIDAGADIIKVGIGPGSICTTRVVTGVGCPQLSAIMSVVEVAERAGVAIVADGGIRFSGDIAKAIAAGSACVMIGSLLAGTDESPGDIFLYQGRSFKSYRGMGSVAAMERGSSARYSQ-…	ALTFDDVLLVPAHSTVLPNTADLSTQLTKNIRLNIPMLSAAMDTVTEAGLAIALAQEGGLGFIHKNMSIERQAEEVRRVKKHESGVVTDPQTVLPTTALSEVKALTERNGFAGYPVVNGE-NELVGIITGRDVRFVTDLSLPVSAVMTPKERLVTVKEGEAREVVLHKMHEKRVEKALVVDDSFHLLGMITVKDFQKAERKPLACKDEHGRLRVGAAVGAGAGNEERVDALVAAGVDVLLIDSSHGHSEGVLQRIRETRAKYPDLQIVGGNVATGAGALALAEAGVSAVKVGIGPGSICTTRIVTGVGVPQITAVSDAVAALEGTGIPVIADGGIRFSGDIAKAIAAGAAAVMVGSMLAGTDESPGEIELYQGRSYKSYRGMGSLGAMSKGSSDRYFQT…	1e-158	462	1189	480	53.75	258	216	338	4	6	70.42	44562	1	9RV1EAFH1NT3RNDTIA1IL2RQILAT1DNFITR2LI1IMML5QT2DESARG4ML2AE4VF2RK1FM1PISEER1VAAEQE1HRQR3FH3MV1VTND1VQ1IVSL1YTATTA1ASDEAVLK2MTKEKRYNSGIFSA1IY3ENSGDEV-GNKE4LI1NG5AVSTNDALQSQLAP1GSEALV2-P-KRENR1IV3KETGVENALR1NVAVKLAHLKLM1QEHK1IV2LA5DSGFCHCLIL1LM5IFEQRKSAQELRNK1NL1TC2SEKH5AG3SGVAAGKADGINAEDE2GDPA1FVDAVANG2LVVLVLVI1TSAS4QEKG2DQARVIVRQEITKRKANKFY1SD1LQVIMVAG2IV2AGEA5IADE2AVDSIAIV13VI5CV2LIST1IVMSSDVA1E…	N/A	N/A	N/A	N/A	N/A	N/A	N/A	N/A	97	97
CLIBASIA_02785	0	CLIBASIA_02785	A4VWH9#PHI:11234#Eno#1307#Streptococcus_suis#unaffected_pathogenicity	A4VWH9#PHI:11234#Eno#1307#Streptococcus_suis#unaffected_pathogenicity	0	0	A4VWH9#PHI:11234#Eno#1307#Streptococcus_suis#unaffected_pathogenicity	A4VWH9#PHI:11234#Eno#1307#Streptococcus_suis#unaffected_pathogenicity	3	417	4	425	INDIIAREVIDSRGSPTIEVDVCLEDGSTGRAMVPSGASTGIHEAFELRDQEK-RYFGKGVLKAIAFVNDEIRTALLGCDARDQLLIDKIMIDLDGTPNKSRLGANAILGVSLAVSKAAAQTSNLPLYKYLGGCSAHILPVPLMNILNGGIHADNALDFQEFMIMPVGAENIREAIRMGAEVFHTLKKELKSKGYSTNVGDEGGFSPNLKTADSALDLIANSIEKAGYNAGKD-LLIALDCAASAFFKKEKYI-----LKGENLELQPN-EMASYLANLVDQYPIYSIEDGMSEDDWHGWKILTNKIGSNCQLVGDDLFVTNPERLHKGINEEVANAILIKPNQIGSVSETLNTIEKAQMAGYPSIISHRSGETEDHTIADLAVATNCGQIKTGSLARS…	ITDVYAREVLDSRGNPTLEVEVYTESGAFGRGMVPSGASTGEHEAVELRDGDKSRYLGLGTQKAVDNVNNVIADAIIGFDVRDQQAIDRAMIALDGTPNKGKLGANAILGVSIAVARAAADYLEVPLYTYLGGFNTKVLPTPMMNIINGGSHSDAPIAFQEFMILPVGAPSFKEGLRWGAEVFHALKKILKARGLVTAVGDEGGFAPKFEGTEDGVETIIEAIEAAGYEAGENGIMIGFDCASSEFYDKERKVYDYTKFEGEGAAVRTSAEQIDYLEELVNKYPIITIEDGMDENDWDGWKALTERLGKRVQWLG-RLLRNKPDYLGRGIKEGAANSILIKVTKSVLLLKHLKLSKWAKEAGYTAVVSHRSGETEDSTIADIAVATNAGQIKTGSLSRT…	5e-157	453	1166	423	54.37	230	184	302	5	9	71.39	44562	1	1NT1IVIY4IL4SN2IL2DE1CYLT1DS1SATF2AG9IE3FV4QGED1-S2FL1KL1VTLQ2IVADFN2DNEV1RATD1LILI1CF1AV3LQLA2KRIA2DA7SGRK10LI2SAKR3QDTYSLNELV3KT4CFSNATHKIV2VT1LM3LI3IS1AS1NAAPLIDA6ML4EPNSIFRK1AGIL1MW6TA3EI2SAKR1YLSV1NA7SA1NKLFKETGATDESDAGLVDELT1AINESA2KA3NE2KEDN-GLILM1AGLF3AS1AE1FYKD2KRYKIV-Y-D-Y-T-KLFKE2NGLAEALVQRPTNS-A1MQAISD2AENE2DNQK3YIST5SD1DN2HD3IA2NEKRIL1SKNRCV1LWVL1D-DR1FLVRTNNK1EDRY1HGKR2NK1EGVA2AS4PV…	N/A	N/A	N/A	N/A	N/A	N/A	N/A	N/A	98	98
CLIBASIA_03870	0	CLIBASIA_03870	A0A5H2Q4P9#PHI:11070#TssH#305#Ralstonia_solanacearum#reduced_virulence	A0A5H2Q4P9#PHI:11070#TssH#305#Ralstonia_solanacearum#reduced_virulence	0	0	A0A5H2Q4P9#PHI:11070#TssH#305#Ralstonia_solanacearum#reduced_virulence	A0A5H2Q4P9#PHI:11070#TssH#305#Ralstonia_solanacearum#reduced_virulence	5	840	11	890	KYSDLMRNVLQSAQTYALAQGHQNLVPEHVLHIFLEDEQGAVYSLIQCSGGDIAQLKDYNQTVLSKIPKVTGGGAQVYLSQPLAVILSKSEEIAKKSGDSFVT---AEKFLLAMVMET--GGIGESLKKCGLKFS--RLEESIKKLRKGR--------VADSVNAE-----------QGFDALKKYCRDLTEEARNGKLDPVIGRDDEMRRAIQVLSRRTKNNPVLIGDPGVGKTAIIEGLASRIINGDIPESLKGKRLMALDMGALIAGAKFRGEFEERLKSLLCEIRSEDGEIILFIDELHVLVGAGKTDGAMDASNLLKPSLARGELHCIGATTLDEYRKYIEKDPALARRFQSLLVGEPTVTDTISILRGLKERYEQHHKVRISDSALVSAAVLS…	KLNATSRQAAERAASLCXARGNYEVDLEHLFLALLENRRSDFAVAARASGIDLAALQRDLEAEIARFQ--TGNTRTPAFSPYLPKLFEHAWLIA--SLDSQITRIRSGHLLLALLTEPSLAALAERGSRLFGRFEVERLKHDFERMTAGSDEQEQAVDFADSTAAQTDDGRAPAAALSSTPALDQFTVDLTQAAREGRIDPVIXRDAEIRQVVDILMRRRQNNPILTGEAGVGKTAVVEGLALRVAANDVPPPLQGVTLRTLDMGLLQAGASVKGEFENRLKNVIDEVKKSPKPIILFIDEAHTIIGAGGQAGQNDAANLLKPALARGELRTIAATTWSEYKKYFEKDAALARRFQVVKVEEPSEPLAAAMLRGMAPLMERHFGVRVLDEAIAEAVRLS…	2e-153	475	1222	891	35.02	312	513	486	14	66	54.55	44562	1	1YLSNDALTMS1NQVALAQESR1QATSYLACLX1QR1HNQYNELVVDPL2VLLFHLIAFL2DNERQRGSADVFYASVLAIAQRCA2GI1IL1QA1KQDRYDNLQETAVELISAKRIFPQK-V-2GNGTARQTVPYALF1QPPY1APVKILLFSEKHSAEWEL2K-K-1GL2FQVI1-R-I-RASEGKHFL3MLVLMT1TP-S-LGAGAILGA1SRLGKSKRCLGFLGKR1SE-V-E2EKEHSDIFKEKRLMRTKA1RS-D-E-Q-E-Q-A-V-DVF3VTNA1EQ-T-D-D-G-R-A-P-A-A-A-LQSGSFTDP2KDKQYFCTRV3EQEA2NE1KRLI4GX2DA1MI1RQAVIVQDVI1SM2TRKQ3VI1IT1DEPA6IVIV4SL1IVIANAGN1IV1E…	N/A	N/A	N/A	N/A	N/A	N/A	N/A	N/A	98	98
CLIBASIA_01275	0	CLIBASIA_01275	Q2FIB5#PHI:2632#ArgH#1280#Staphylococcus_aureus#reduced_virulence	Q2FIB5#PHI:2632#ArgH#1280#Staphylococcus_aureus#reduced_virulence	0	0	Q2FIB5#PHI:2632#ArgH#1280#Staphylococcus_aureus#reduced_virulence	Q2FIB5#PHI:2632#ArgH#1280#Staphylococcus_aureus#reduced_virulence	11	459	3	450	NQMWGGRFSSSPSWIMEKINVSIDFDKKLFEQDILGSKVHTTMLAKQGIISSEEAQKIIEGLKVIRAEIVDGSFVFSRDLEDIHMNIEARLTSLIGSIAGKMHTARSRNDQVALDLRLWIKEKTLEITNDLKKLLTILLDKAEEHHNTIMPGFTHLQTAQPVTFGHHCMAYVEMFGRDISRFFDSIERLDECPLGAAALAGTSFPIDRHFTAKELGFREPTRNSIDSVSDRDFILECLSHSAICAMHMSRLAEEIILWSTPQFNFVRLSDAFSTGSSIMPQKRNPDGAELVRAKTGRINGALLSLLTIMKGLPLAYSKDMQEDKEPVFDALETLQIIILAISAMIEDLTVNKDRLQEAATKSHSTATDLADWLVSHAGLPFREAHYITGCTVSLAEKNQ…	NKAWGGRFEVQPEEWVDDFNASITFDQTLIDQDIEGSIAHATMLANQGIISQQDSEQIIQGLKSIQHDYHQDQIQFSASLEDIHLNIEHELIKRIGDAGGKLHTGRSRNDQVATDMHLYTKKQVQDIIALIKSLQSVIVDIASNNVDTIMPSYTHLQRAQPISFAHHIMTYFWMLQRDQQRFEDSLKRIDINPLGAAALSGTTYPIDRHETTALLNFGSLYENSLDAVSDRDYIIETLHNISLTMVHLSRFAEEIIFWSTDEAKFITLSDAFSTGSSIMPQKKNPDMAELIRGKVGRTTGHLMSMLMTLKGLPLAYNKDMQEDKEGLFDAVHTIKGSLRIFEGMIQTMTINKERLNQTVKEDFSNATELADYLVT-KNIPFRTAHEIVGKIVLECIQQG…	5e-153	446	1147	449	49	220	228	300	1	1	66.82	44562	1	1QKMA5SESVSQ1SEWEIWMVEDKDIF1VA2DT2KQKT1FIED3LE2KIVA1TA4KN5SQEQEDASQEKQ2EQ3VS1RQAHEDIYVHDQGDSQFIVQ2RADS5ML3AHRE1TISKLR2SDIAAG2ML2AG8LT1LMRH1WYIT1EKKQTVLQED1TINADLLI1KS1LQTSIVLILV1KI1ESENHNHVND4GSFY4TR3VITS1GA2CI1AT1VFEW1FLGQ2IQSQ2FE2ILEK1LI1EICN7AS2STFY5FE1ATKAEL1GN1RGESPLTYRE2IL1SA5FY1LI1CT1SHHNSIASILCTAMMV1ML2LF5LF3PDQEFANK1VIRT15RK3GM3VI1AG1TV2ITNT1AH1LM1LM1TMITML7SN8PGVL3LVEH1LIQKIGISILLRAIIFS…	N/A	N/A	N/A	N/A	N/A	N/A	N/A	N/A	95	95
CLIBASIA_04375	0	CLIBASIA_04375	Q2FFI7#PHI:7345#PurB#1280#Staphylococcus_aureus#reduced_virulence	Q2FFI7#PHI:7345#PurB#1280#Staphylococcus_aureus#reduced_virulence	0	0	Q2FFI7#PHI:7345#PurB#1280#Staphylococcus_aureus#reduced_virulence	Q2FFI7#PHI:7345#PurB#1280#Staphylococcus_aureus#reduced_virulence	1	430	1	427	MIPRYSRTTMTTLWSLETKFRIWFEIEAHACDALAKLGVIPEKSSKNIWEKGRNAVFNVDRIMELDSIIKHDVIAFLTHLAEIIGPDARFIHQGMTSSDILDTCFSIQLMRSTDILLEDIDQLLESLKKRAFEYKDTLTIGRSHGIHAEPTTFGLKLAMAYAEFSRSRKRLLTAREEIAVCAISGSVGTFSNIHPYVEQHVADAMGLKTDPISSQVIARDRHAMYFSVLGVIASSIERVATEIRHLQRTEILEVEEFFHPGQKGSSSMPHKRNPILTENLTGLSRLIRSHVIPAMENVALWHERDISHSSVERVIGPDATIHLDFALNRLKNVIEELVVYPENMKDNLEQLKGLIHSQRILLALTQAGVSREEAYQLVQRNAMKVWKNGAIFLDVLLAD…	MIERYSREEMSNIWTDQNRYEAWLEVEILACEAWSELGHIPKADVQKI---RQNAKVNVERAQEIEQETRHDVVAFTRQVSETLGEERKWVHYGLTSTDVVDTALSFVIKQANDIIEKDLERFIDVLAEKAKNYKYTLMMGRTHGVHAEPTTFGVKMALWYTEMQRNLQRFKQVREEIEVGKMSGAVGTFANIPPEIESYVCKHLGIGTAPVSTQTLQRDRHAYYIATLALIATSLEKFAVEIRNLQKTETREVEEAFAKGQKGSSAMPHKRNPIGSENITGISRVIRGYITTAYENVPLWHERDISHSSAERIMLPDVTIALDYALNRFTNIVDRLTVFEDNMRNNIDKTFGLIFSQRVLLALINKGMVREEAYDKVQPKAMISWETKTPFRELIEQD…	3e-150	436	1122	430	47.21	203	224	302	1	3	70.23	44562	1	2PE4TETE1TSTNLI1STLDEQTNKRFYREIA1FL1IV1AIHL2DE1LWASKE2VH2EKKASDSVKQNK1W-E-K-GRRQ2VKFV2DE1IAMQ1LIDESQIEITKR3IV2LTTRHQLVAS1ITIL1PEDEARRKFWIV1QY1ML2ST1IVLV2CAFL1IFQVLIMKRQSATN2LILEEK1ILDEQRLFLIEDSV1KAKERK1FKEN2DY2TMIM2ST2IV8LV1LM1MLAW1AT1FMSQ1SNRLKQ1LFLKTQAV4AE1CGAKIM2SA4SA2HP1YEVI1QSHY1ACDKAHML1LIKG1DA1IV1ST1VTILAQ5MY1FISAVT1GAVL2ST1IL1RKVF1TV3HN2RK2ITLR4FA1HAPK6SA8LGTS2LI2LI2LV2SGHYVIITPT1MY3AP11V…	N/A	N/A	N/A	N/A	N/A	N/A	N/A	N/A	99	99
CLIBASIA_03505	0	CLIBASIA_03505	Q180Y6#PHI:10717#Rho#1496#Clostridioides_difficile#reduced_virulence	Q180Y6#PHI:10717#Rho#1496#Clostridioides_difficile#reduced_virulence	0	0	Q180Y6#PHI:10717#Rho#1496#Clostridioides_difficile#reduced_virulence	Q180Y6#PHI:10717#Rho#1496#Clostridioides_difficile#reduced_virulence	56	419	168	526	GVIEVLQDGFGFLRSPDANYLAGPDDIYVSPSQIKSFSLKTGDTVEGSIRAPREGERYFALLKVNAINFDVPERVRNKIHFDNLTPLYPDKRFNMELNNPENKDISSRVIDLIAPIGKGQRSLIVAPPRTGKTILLQNIAHSIKKNHPECYLIVLLIDERPEEVTDMQRSVQGEVISSTFDESAARHVQVAEMVIAKAKCLVEYGLDVVILLDSITRLCRAYNVLMPSSGKILTGGVDANALQRPKRFFGAARNIKEGGSLTIIGTALVDTGSRMDEVIFEEFKGTGNSEIVLERKIADKRIFPAMDIIKSGTRKEDLLVERQDLQKVFMLRRIVSSMNSSDAIEFLIDKLKQTKDNKDFFYSM	GVLEILPDGFGFLRG--SNYLSTEGDVYVSPSQIRRFNMKTGDKIKGITRHPKSGEKFRALLYVQKINDENPDTAIQRNAFETLTPIFPEERLTLETNRNE---IATRIIDLISPIGKGQRGLIVAPPKAGKTVLLKSVANSIAKNHPNVELIVLLIDERPEEVTDMKESIEGDVIYSTFDQVSSHHVKVAEMVLNRAQRLVEHGKDVVILLDSITRLARAYNLTISPTGRTLSGGIDPGALHGPKKFFGAARNIRQGGSLTILGTALVETGSRMDDVIFEEFKGTGNMELHLDRKLAEKRIFPAIDIYKSGTRRDDLLLDDEEKTALWRLRREMSNNSVMEITDKVIELIKRTKDNKEFVKSI	4e-150	439	1129	364	57.69	210	149	290	2	5	79.67	44562	1	2IL1VI1QP7SGP-D-AS3ASGTPEDG1IV7KRSR1SNLM4TKVIEK1SIIT1AH1RKES2RKYFFR3KY1NQAK2FDDEVN1EDRTVARINQKRINHA1DENT3LIYF1DEKE1FLNTML1LT1NRPN1N-K-D-1SAST1VI4AS7SG6RKTA3IV2QKNSIV1HN2KA4ENCVYE16QKRE1VIQE1ED2SY4EQSVASASRH2QK5ILANKR1KQCR3YH1LK12CA4VLLTMIPSSPST1KRIT1TS2VI1APNG2QHRG2RK8KREQ6IL5DE6ED11SM1ILVH1ED2IL1DE6MI2IY5KRED3VLEDRDQEDELKQTKAVLFWMR3IEVM1SNMNNSSVSMDEAIITEDFKLV1DEKLLI1QR5DE1FVYK1MI	N/A	N/A	N/A	N/A	N/A	N/A	N/A	N/A	86	86
CLIBASIA_00150	0	CLIBASIA_00150	W8TRT9#PHI:10282#TufA#1280#Staphylococcus_aureus#increased_virulence_(hypervirulence)__unaffected_pathogenicity	W8TRT9#PHI:10282#TufA#1280#Staphylococcus_aureus#increased_virulence_(hypervirulence)__unaffected_pathogenicity	0	0	W8TRT9#PHI:10282#TufA#1280#Staphylococcus_aureus#increased_virulence_(hypervirulence)__unaffected_pathogenicity	W8TRT9#PHI:10282#TufA#1280#Staphylococcus_aureus#increased_virulence_(hypervirulence)__unaffected_pathogenicity	1	392	1	394	MVEKRYVRNKESLGLSTIGHVDHGKTTLTAAITKYYSEE----KKEYGDIDSAPEEKLRGITIATAHVSYETDKRFYSHIDCPGHADYVKNMITGATQADGAILVCAAEDGPKPQTREHILLARQIGISSIVVYMNKVDAVDDDELLDISEYEIRDLLKEHKY-SDDTPIIRGSALCALQGTNKELGEDSIHALMKAVDTHIPTPQRSLDAPFLMHIEGSCGIEGRGTVVTGCIKRGRIKAGSDVEIIGMGGKKLKVKCTDVEMFRKKLDEAIAGDNVGLLLRGVNRADVPRGRVVCAPGSIQEYSRFRASVYILTASEGGRTTGFMDNYRPQFFMDTADVTGRIILSPGSQAVMPGDRVDLEVELIYPIAMEPNQTFSMREGGKTVGAGLILEIIE	MAKEKFDRSKEHANIGTIGHVDHGKTTLTAAIATVLAKNGDSVAQSYDMIDNAPEEKERGITINTSHIEYQTDKRHYAHVDCPGHADYVKNMITGAAQMDGGILVVSAADGPMPQTREHILLSRNVGVPALVVFLNKVDMVDDEELLELVEMEVRDLLSEYDFPGDDVPVIAGSALKALEGDAQY--EEKILELMEAVDTYIPTPERDSDKPFMMPVEDVFSITGRGTVATGRVERGQIKVGEEVEIIGLHDTS-KTTVTGVEMFRKLLDYAEAGDNIGALLRGVAREDVQRGQVLAAPGSITPHTEFKAEVYVLSKDEGGRHTPFFSNYRPQFYFRTTDVTGVVHLPEGTEMVMPGDNVEMTVELIAPIAIEDGTRFSIREGGRTVGSGVVTEIIK	7e-150	432	1111	397	57.43	228	161	292	4	8	73.55	44562	1	1VAEKKERKYFVD1NS2SHLAGNLISG16TAKTYVYLSAEKEN-G-D-S-VKAKQES1GDDM2SN5LE5AN1AS1VISE1EQ4FH1SA1IV16TA1AM2AG3CVAS1EA3KM9AS1QNIV1IVSPSAIL2YFML4AM3DE3DEILSV1YM1IV4KS1HYKDYF-PSG2TV1IV1RA4CK2QE1TDNAKQEYL-G-1DESK1HLAE2KE4HY4QE1SDLS1AK2LM1HPIV1GDSVCFGS1ET5VA2CRIVKE2RQ2AV1SEDE5MLGHGDKTKSL-1VTKTCV1DG6KL2EY1IE4VI1LA5NA1AE2PQ2RQ1VLCA5QTEPYHSTRE1RK1SE2IV1TSAKSD4TH1GP1MFDS6FYMFDR1AT4RVIVIH1SPPE1STQEAM5RN1DELMET4YA3…	N/A	N/A	N/A	N/A	N/A	N/A	N/A	N/A	100	100
CLIBASIA_00740	0	CLIBASIA_00740	W8TRT9#PHI:10282#TufA#1280#Staphylococcus_aureus#increased_virulence_(hypervirulence)__unaffected_pathogenicity	W8TRT9#PHI:10282#TufA#1280#Staphylococcus_aureus#increased_virulence_(hypervirulence)__unaffected_pathogenicity	0	0	W8TRT9#PHI:10282#TufA#1280#Staphylococcus_aureus#increased_virulence_(hypervirulence)__unaffected_pathogenicity	W8TRT9#PHI:10282#TufA#1280#Staphylococcus_aureus#increased_virulence_(hypervirulence)__unaffected_pathogenicity	1	392	1	394	MVEKRYVRNKESLGLSTIGHVDHGKTTLTAAITKYYSEE----KKEYGDIDSAPEEKLRGITIATAHVSYETDKRFYSHIDCPGHADYVKNMITGATQADGAILVCAAEDGPKPQTREHILLARQIGISSIVVYMNKVDAVDDDELLDISEYEIRDLLKEHKY-SDDTPIIRGSALCALQGTNKELGEDSIHALMKAVDTHIPTPQRSLDAPFLMHIEGSCGIEGRGTVVTGCIKRGRIKAGSDVEIIGMGGKKLKVKCTDVEMFRKKLDEAIAGDNVGLLLRGVNRADVPRGRVVCAPGSIQEYSRFRASVYILTASEGGRTTGFMDNYRPQFFMDTADVTGRIILSPGSQAVMPGDRVDLEVELIYPIAMEPNQTFSMREGGKTVGAGLILEIIE	MAKEKFDRSKEHANIGTIGHVDHGKTTLTAAIATVLAKNGDSVAQSYDMIDNAPEEKERGITINTSHIEYQTDKRHYAHVDCPGHADYVKNMITGAAQMDGGILVVSAADGPMPQTREHILLSRNVGVPALVVFLNKVDMVDDEELLELVEMEVRDLLSEYDFPGDDVPVIAGSALKALEGDAQY--EEKILELMEAVDTYIPTPERDSDKPFMMPVEDVFSITGRGTVATGRVERGQIKVGEEVEIIGLHDTS-KTTVTGVEMFRKLLDYAEAGDNIGALLRGVAREDVQRGQVLAAPGSITPHTEFKAEVYVLSKDEGGRHTPFFSNYRPQFYFRTTDVTGVVHLPEGTEMVMPGDNVEMTVELIAPIAIEDGTRFSIREGGRTVGSGVVTEIIK	7e-150	432	1111	397	57.43	228	161	292	4	8	73.55	44562	1	1VAEKKERKYFVD1NS2SHLAGNLISG16TAKTYVYLSAEKEN-G-D-S-VKAKQES1GDDM2SN5LE5AN1AS1VISE1EQ4FH1SA1IV16TA1AM2AG3CVAS1EA3KM9AS1QNIV1IVSPSAIL2YFML4AM3DE3DEILSV1YM1IV4KS1HYKDYF-PSG2TV1IV1RA4CK2QE1TDNAKQEYL-G-1DESK1HLAE2KE4HY4QE1SDLS1AK2LM1HPIV1GDSVCFGS1ET5VA2CRIVKE2RQ2AV1SEDE5MLGHGDKTKSL-1VTKTCV1DG6KL2EY1IE4VI1LA5NA1AE2PQ2RQ1VLCA5QTEPYHSTRE1RK1SE2IV1TSAKSD4TH1GP1MFDS6FYMFDR1AT4RVIVIH1SPPE1STQEAM5RN1DELMET4YA3…	N/A	N/A	N/A	N/A	N/A	N/A	N/A	N/A	100	100
CLIBASIA_01275	0	CLIBASIA_01275	Q04MW6#PHI:4922#ArgGH#1313#Streptococcus_pneumoniae#reduced_virulence	Q04MW6#PHI:4922#ArgGH#1313#Streptococcus_pneumoniae#reduced_virulence	0	0	Q04MW6#PHI:4922#ArgGH#1313#Streptococcus_pneumoniae#reduced_virulence	Q04MW6#PHI:4922#ArgGH#1313#Streptococcus_pneumoniae#reduced_virulence	12	459	6	452	QMWGGRFSSSPSWIMEKINVSIDFDKKLFEQDILGSKVHTTMLAKQGIISSEEAQKIIEGLKVIRAEIVDGSFVFSRDLEDIHMNIEARLTSLIGSIAGKMHTARSRNDQVALDLRLWIKEKTLEITNDLKKLLTILLDKAEEHHNTIMPGFTHLQTAQPVTFGHHCMAYVEMFGRDISRFFDSIERLDECPLGAAALAGTSFPIDRHFTAKELGFREPTRNSIDSVSDRDFILECLSHSAICAMHMSRLAEEIILWSTPQFNFVRLSDAFSTGSSIMPQKRNPDGAELVRAKTGRINGALLSLLTIMKGLPLAYSKDMQEDKEPVFDALETLQIIILAISAMIEDLTVNKDRLQEAATKSHSTATDLADWLVSHAGLPFREAHYITGCTVSLAEKNQC…	KLWGGRFEGTVEDWVERFGASISFDQKLAKFDVIGSLAHVQMLGQTGILSLEESEKIQVGLKELLEELEAGQLDFDIANEDIHMNMEVLLTEKIGPLAGKLHTARSRNDQVATDMHLYLKEQLGYVLDKLAHLKGVLLDLAENHVATIMPGYTHLQHAQPISFAYHLMAYYNMFQRDSERFEFNQKHTDLCPLGAAALAGTTFPIDRQLSSDLLEFKQPYTNSLDAVSDRDFILEFLSNASILMMHMSRFCEEMINWCSFEYQFITLSDTFTIGSSIMPQKKNPDMAELIRGKTGRVYGHLFGLLTVMKSLPLAYNKDLQEDKEGMFDTVETILNSLDVLAGMLSSLQVNKEKMQESTEKDFSNATELADYLAG-KGLPFREAHEVVGRLVLDSIKSAK…	1e-149	437	1125	448	49.78	223	224	301	1	1	67.19	44562	1	QKML5SESGSTPVSEWDIWMV1KRIFNGVA2DS2KQ2FAEKQF1IVLI2KLVA1TVTQ2AGKQQT2IL1SL2ASQE2IQEV3VEILRLAE1ILVEDA1SQFLVD1SDRIDALN6IM1AVRL2SELK2SPIL3ML11LT1LMRH1WYIL2KQTLLGEYIVTLNDDK1KAKH1LKTGIV3KL2EN1HVNA5FY4TH3VITS1GAHY1CL3VYEN2GQ2ISSE2FEDFSNIQEKRHLT1EL11ST5HQFLTSASKDEL1GE1RKEQ1TYRT2IL1SA9CF2HNSAAS1CLAM5LFAC2IM1LN1SCTSPFQEFYNQ1VIRT3AT1STTI8RK3GM3VI1AG4IVNY1AH1LFSG3IV2GS5SN2ML5PGVM2ATLV2LIQLINISILLDAVILSAAG1ILES…	N/A	N/A	N/A	N/A	N/A	N/A	N/A	N/A	95	95
CLIBASIA_03870	0	CLIBASIA_03870	H9L4K2#PHI:6590__PHI:11510#ClpV#28901#Salmonella_enterica#reduced_virulence	H9L4K2#PHI:6590__PHI:11510#ClpV#28901#Salmonella_enterica#reduced_virulence	0	0	H9L4K2#PHI:6590__PHI:11510#ClpV#28901#Salmonella_enterica#reduced_virulence	H9L4K2#PHI:6590__PHI:11510#ClpV#28901#Salmonella_enterica#reduced_virulence	153	853	186	878	NAEQGFDALKKYCRDLTEEARNGKLDPVIGRDDEMRRAIQVLSRRTKNNPVLIGDPGVGKTAIIEGLASRIINGDIPESLKGKRLMALDMGALIAGAKFRGEFEERLKSLLCEIRSEDGEIILFIDELHVLVGAGKTDGAMDASNLLKPSLARGELHCIGATTLDEYRKYIEKDPALARRFQSLLVGEPTVTDTISILRGLKERYEQHHKVRISDSALVSAAVLSNRYITDRFLPDKAIDLMDEASARVRMQIDTKPEVLDELDRRIICLKIEKEALKKEKDSFSKGRLIELEKELSSLEEKSHSLTLRWQEGQRKILYVADLKKRLESMRNELAIAQRQGHFERAGELAYGLIPKTEKELDEAEKADST----AEDMVQE------VVTSDNIANIVS…	GGQDGKSALAKYCQDMTAQARDGKIDPVTGREHEIRTMTDILLRRRQNNPLLTGEAGVGKTAVVEGFALAIAQGEVPPALREVRLLALDVGALLAGASMKGEFESRLKGLLEEAGRSPQPVILFVDEVHTLVGAGGASGTGDAANLLKPALARGTLRTIGATTWSEYKRHIEKDPALTRRFQVLQIAEPEEIPAMEMVRGLVDTLEKHHNVLILDEAVRAAVQLSHRYIPARQLPDKAISLLDTAAARVALTLHTPPASVQFLRQQLKAAEMERSLLQKQEK-------------------------MGIQSDERRDALMA----RIFSLNNELTASESR--WQRELELVHTL---QELRLAESDADDKTTLQQAETALREWQGDAPVVFPEVSAAVVA…	2e-149	464	1194	729	38.55	281	384	431	13	64	59.12	44562	1	NGAGEQQD1FKDS2KA3RQ1LM1EAEQ2ND2LI3IT2DEDH1MI1RTAMITQDVI1SL2TRKQ3VL1IT1DEPA6IVIV2LF1SLRA1IANQ1DEIV1EPSA1KRGEKV2ML3MV3IL3KSFMRK4ES3SG2CE1IARGSRESDPGQEPIV3IV2LV1VT5KGTADS1ATMG2SA5SA4ET1HRCT5LWDS2RKKRYH7AT4SV1LQVIGA2TEVETIDPTAIMSEIMLV3KVEDRTYL1QK2KN1RL1SL1SE1LVVRSA1AVVQ2NH3TPDA1FQ6DS1ML1ET1SA3RAMLQTILDH1KP1EAVSLVDQEF1DRRQRQILIKCALAKEIM1KRESAL1KQ1EQKEDKS-F-S-K-G-R-L-I-E-L-E-K-E-L-S-S-L-E-E-K-S-H-S-L-T…	N/A	N/A	N/A	N/A	N/A	N/A	N/A	N/A	82	82
CLIBASIA_03870	0	CLIBASIA_03870	Q6TKU1#PHI:4559#T6SS2#562#Escherichia_coli#effector_(plant_avirulence_determinant)	Q6TKU1#PHI:4559#T6SS2#562#Escherichia_coli#effector_(plant_avirulence_determinant)	0	0	Q6TKU1#PHI:4559#T6SS2#562#Escherichia_coli#effector_(plant_avirulence_determinant)	Q6TKU1#PHI:4559#T6SS2#562#Escherichia_coli#effector_(plant_avirulence_determinant)	155	816	172	862	EQGFDALKKYCRDLTEEARNGKLDPVIGRDDEMRRAIQVLSRRTKNNPVLIGDPGVGKTAIIEGLASRIINGDIPESLKGKRLMALDMGALIAGAKFRGEFEERLKSLLCEIRSEDGEIILFIDELHVLVGAGKTDGAMDASNLLKPSLARGELHCIGATTLDEYRKYIEKDPALARRFQSLLVGEPTVTDTISILRGLKERYEQHHKVRISDSALVSAAVLSNRYITDRFLPDKAIDLMDEASARVRMQIDTKPEVLDELDRRIICLKIEKEALKKE------KDSFSKGRLIE-LEKELSSLEEKSHSLTLRWQEGQRKILYVADLKKRLESMRNELAIAQRQGHFERAGELAYGLIPKTEKELDEAEKAD--------STAED-------------…	ETGDTLLARYAKNMTADARNGRLDPVLCRNYEIDLMIDILCRRRKNNPVVVGEAGVGKSALIEGLALRIVAGQVPDKLKNTDIMTLDLGALQAGASVKGEFEKRFKGLMAEVIFSPVPVILFIDEAHTLIGAGNQQGGLDISNLLKPALARGELKTIAATTWSEYKKYFEKDAALSRRFQLVKVSEPNAAEATIILRGLSAVYEQSHGVLIDDDALQAAATLSERYLSGRQLPDKAIDVLDTACARVAINLSSPPKQISALTTLSHQQEAEIRQLERELRIGLRTDTSRMTEVLEQYDETLSALDE----LEVAWQQ-QTLVQEIIALRQQL------LGVAEDDVASLPDADAVEDTPPEAEQDSTDAESADDAGSVQPEETAETVSPVQRLAQLTAE…	2e-149	465	1196	703	39.69	279	371	409	10	53	58.18	44562	1	1QT1FDDTAL1KAKR1CARKDNLM1EAED4KR4ILGC1DNDY1MIRDRLAM1QDVI1SC2TR5LVIV1DEPA4TS1IL5SL2IVNA1DQIV1EDSK2GNKTRDLI1AT2ML3IQ3KSFVRK4EK1LF1SG1LMCA1IVRISFESDPGVEPIV6LA1VT1VI3KNTQDQ1AGML1AI6SA6HKCT1GA3LWDS2RK2IF3PA2AS4SLLVLK1GS2TNVATADETAITSI5KSEARV3HS1KG1RL1SD1SD2VQSA2VT2NE2ILTSDG1FQ7LVML1ET1SC3RAMIQNILDSTSKP1EKVQLIDSEA1DTRTRLISIHCQLQKEIA1KIERAQ1KEKR1-L-R-I-G-L-RKT1STFSSRKMGTRELVIL1-QLYEDKEET2SA1ED1K-S-H-S-1…	N/A	N/A	N/A	N/A	N/A	N/A	N/A	N/A	78	78
CLIBASIA_04130	0	CLIBASIA_04130	Q9HVW7#PHI:7630#MurA#287#Pseudomonas_aeruginosa#reduced_virulence__unaffected_pathogenicity	Q9HVW7#PHI:7630#MurA#287#Pseudomonas_aeruginosa#reduced_virulence__unaffected_pathogenicity	0	0	Q9HVW7#PHI:7630#MurA#287#Pseudomonas_aeruginosa#reduced_virulence__unaffected_pathogenicity	Q9HVW7#PHI:7630#MurA#287#Pseudomonas_aeruginosa#reduced_virulence__unaffected_pathogenicity	1	430	1	421	MDRIKIIGGNKLNGTIAISGAKNASLPVMIASLLTSETLTLENIPDLADVKLLIRILRSHGVEILSDSSYNDQNKSYSSTMHFRCRHIVDLTGSYDLVSKMRASFWVIGPLLAREGYARISLPGGCAIGTRPVDLFVDSLKSLGVVIKIDGGYVDARVSSKGLRGTSYTFPKVSVGATQVMMMVASLSHGDTSIYNAAREPEVVDLAHCLNSMGAKISGMGSSTITIQGVTSLSGTRHRILPDRIEAGTYAMAVAMTGGDVILKMTDSSLLKTVFKVMRQTGVDIDIIDEGIRVRWNGEKLRPVDVITAPFPGFPTDLQAQFMAMMCCAAGISHITETIFENRFMHVQELVRLGARISLSGQTARVEGVQGLRGAPVMATDLRASVSLVIAALAAQGET…	MDKLIITGGNRLDGEIRISGAKNSALPILAATLLADTPVTVCNLPHLHDITTMIELFGRMGVQPIIDEKLNVEVDASS---------IKTLVAPYELVKTMRASILVLGPMLARFGEAEVALPGGCAIGSRPVDLHIRGLEAMGAQIEVEGGYIKAKAPAGGLRGGHFFFDTVSVTGTENLMMAAALANGRTVLQNAAREPEVVDLANCLNAMGANVQGAGSDTIVIEGVKRLGGARYDVLPDRIETGTYLVAAAATGGRVKLKDTDPTILEAVLQKLEEAGAHISTGSNWIELDMKGNRPKAVNVRTAPYPAFPTDMQAQFISMNAVAEGTGAVIETVFENRFMHVYEMNRMGAQILVEGNTAIVTGVPKLKGAPVMATDLRASASLVIAGLVAEGDT…	1e-147	429	1104	430	49.77	214	207	293	1	9	68.14	44562	1	2RKILKI1IT3KR1ND1TE1AR6ASSA2VIMLIA1ST2TASDETTPLV1LVEC1IL1DH1AH1VIKTLTLM1REILLFRGSRHM2EQIPLISI1SESKYL1DVQENVKDSAYS1S-T-M-H-F-R-C-R-H-1VKDT1TVGASP1DE2SKKT4FIWL1IL2LM3EF1YE1REIVSA8TS5FHVIDRSG1KESALM1VAVQ1KEIVDE3VIDK1RKVASPSAKG4TGSHYFTF1PDKT3GTAG1QEVNML2VA1SA1SAHN1DR1SVILYQ12HN3SA3KNIVSQ1MA2SD2TV1QE2TKSR1SG1TA1HYRDIV6AT3ALMV1VA1MA3DR1IK2MD2SPSTLI1KETA1FLKQVKMLREQETA1VADH1DSITIGDSENGW1REVLRDWMNK1ENKRL…	N/A	N/A	N/A	N/A	N/A	N/A	N/A	N/A	100	100
CLIBASIA_03505	0	CLIBASIA_03505	T1YC56#PHI:8558#Rho#1280#Staphylococcus_aureus#increased_virulence_(hypervirulence)	T1YC56#PHI:8558#Rho#1280#Staphylococcus_aureus#increased_virulence_(hypervirulence)	0	0	T1YC56#PHI:8558#Rho#1280#Staphylococcus_aureus#increased_virulence_(hypervirulence)	T1YC56#PHI:8558#Rho#1280#Staphylococcus_aureus#increased_virulence_(hypervirulence)	10	421	24	430	KNKSPTKLLAFAESLEIENANVMRKQELMFSILKVLSGRDVEIIGEGVIEVLQ-DGFGFLRSPDANYLAGPDDIYVSPSQIKSFSLKTGDTVEGSIRAPREGERYFALLKVNAINFDVPERVRNKIHFDNLTPLYPDKRFNMELNNPENKDISSRVIDLIAPIGKGQRSLIVAPPRTGKTILLQNIAHSIKKNHPECYLIVLLIDERPEEVTDMQRSVQG-EVISSTFDESAARHVQVAEMVIAKAKCLVEYGLDVVILLDSITRLCRAYNVLMPSSGKILTGGVDANALQRPKRFFGAARNIKEGGSLTIIGTALVDTGSRMDEVIFEEFKGTGNSEIVLERKIADKRIFPAMDIIKSGTRKEDLLVERQDLQKVFMLRRIVSSMNSSDAIEFLIDKL…	KNYTTKELTQKAKTLKLTNYSKLNKKELVLAIMEAQMEKDGNYYMEGILDDIQPDGYGFLRT--VNYSKGEKDIYISASQIRRFEIKRGDKVTGKVRKPKDNEKYYGLLQVDFVNDHNAEEVKKRPHFQALTPLYPDERIKLET---ETQNYSTRIMDLVTPIGLGQRGLIVAPPKAGKTSLLKEIANAISTNKPDAKLFILLVGERPEEVTDLERSVEAAEVVHSTFDEPPEHHVKVAELLLERAKRLVEIGEDVIILMDSITRLARAYNLVIPPSGRTLSGGLDPASLHKPKAFFGAARNIEAGGSLTILATALVDTGSRMDDMIYEEFKGTGNMELHLDRKLSERRIFPAIDIGRSSTRKEELLISKSELDTLWQLRNLFT--DSTDFTERFIRKL…	8e-145	422	1086	414	50.24	208	197	303	5	9	73.19	44562	1	2KYSTPTTKKE1LTAQFK1EKST1EKILET1AYNSVKMLRN1QK2MVFLSA1LMKEVALQSMGERK1VGENIYIYGM2VIILEDVDLI1-P2FY4STP-D-AV2LSAK1PEDK3VI1PA3KRSR1SELI1TR2TK1ET1SKIV1AK1RKEDGN1RK1FYAG2KQ1NDAFIV1FDDHVNPA1RE1RKNKKRIP2DQNA7KE1FINKML1LTN-N-P-1NTKQDNIY1ST1VIIM2IVAT3KL3SG6RKTA3IS2QKNE2HNSA1KSKT1HK1EDCAYK1IFVI2IVDG8MLQE3QEGA-A2IVSH5SPAPAERH2QK3MLVLILAEKR2CR3YI1LE2VI2LM6CA4VLLVMI1SP2KRIT1TS2VL1APNAAS1QHRK2RA8KEEA6ILGA11EDVM1F…	N/A	N/A	N/A	N/A	N/A	N/A	N/A	N/A	97	97
CLIBASIA_02100	0	CLIBASIA_02100	I1RSU2#PHI:724__PHI:730#PKS9__KSA1#5518#Fusarium_graminearum#unaffected_pathogenicity	I1RSU2#PHI:724__PHI:730#PKS9__KSA1#5518#Fusarium_graminearum#unaffected_pathogenicity	0	0	I1RSU2#PHI:724__PHI:730#PKS9__KSA1#5518#Fusarium_graminearum#unaffected_pathogenicity	I1RSU2#PHI:724__PHI:730#PKS9__KSA1#5518#Fusarium_graminearum#unaffected_pathogenicity	1	419	1	427	MRRVVVTGLGMITPLGCGVDVSWSRLIAGEVGI---RHLDQKFDLEGLSSKIAGLIPVGNGSDGTFNYEDWILSSDLRKIDQFILYGMVASDMALADSGWAPKTDKDRNSTGVVFGSGMGGLNRIVESSNVLRDGGPRKISPFTVPGSIISLLSGNISIRNQLRGPNHAVTTACSSGAHAIGDASRLIAFGDADVMVAGGAEAPICRLGVASFAACRALSTRFNDDPTRASRPFDQDRDGFVMGEGAGALVLEDLEHAKARGAKIYSEIIGYGLSGDAFHITMPPEDGNGAYRCMSSAIARAKLLPSDIDYINAHGTST-IADTIELGAVERLM-GDSCYH----VSMSSTKSAMGHLLGAAGAVEAAICNLAIRDGIVPATLNLDNPAKKTFIDLVPH…	MRRVVVTGLGAITPLGVGVKRTWTRLLSGECGIVSVADLEPQTRWKELTSTVSGLVPSGDG-EGQWRASDWLSANEQRRMSKFTQYAIAASDMALKDAGWEPKSEEQLEATGVCLGSGIGNLDEIYDTSLVHHKDGYKKVSPLFVPKILINMAAGHIAMKYGFQGPNHAATTACTTGAHSIGDASRFISMGDADIMVAGGSESCIHPLTFAGFGRARSLSTAYNNNPTASCRPFDADRNGFVVSEGAAVLILEELEHAKARGARIYAEIKGYGCSGDAHHMTAPREDGRGAFLAMKKALKNAGVKPSQVDYINAHATATNVGDVAETSAIRRLMLGEEGHEKESDITVSSTKGAVGHLLGAAGAIEALFSVLAIHQRVVPATLNLQKPDVGAAFNFVPN…	3e-144	420	1080	428	51.64	221	197	303	5	10	70.79	44562	1	10MA5CV2DKVRST1ST2ILAS2VC2-V-S-VRAHD1DEQPKQFTDRLWEKGE1ST1KTIVAS2IV1VS1ND1S-DE1TQFWNRYAES2ILLSSASNDELQ1KRIMDSQK1ITLQ1GAMIVA6AK1SA2AE2TSDEKEDQRLNESA3VCFL3MI1GN1NDRE1VYEDST1NL1LHRHDKGD1PYRK1IV2FLTF2GKSIIL1SNLMLASA1NH1SAIMRKNYQGLFRQ5VA4STST3AS6LF1ASFM4VI5AS1ASPC1CHRP1GTVF1SG1AGARCA1AS3RAFY1DNDN2RAASSC4QA2DN3MVGS3GAAV1VI2DE9KR2SA2IK3LC4FH1IM1MA1PR3NR2YFRLCA1SKSK1ILAKRN1KGLVLK2DQIV6GA1SA1-NIVAG1TVIA1LT…	N/A	N/A	N/A	N/A	N/A	N/A	N/A	N/A	99	99
CLIBASIA_01170	0	CLIBASIA_01170	C5BEV2#PHI:2962#GlyA#67780#Edwardsiella_ictaluri#reduced_virulence	C5BEV2#PHI:2962#GlyA#67780#Edwardsiella_ictaluri#reduced_virulence	0	0	C5BEV2#PHI:2962#GlyA#67780#Edwardsiella_ictaluri#reduced_virulence	C5BEV2#PHI:2962#GlyA#67780#Edwardsiella_ictaluri#reduced_virulence	11	396	5	391	QQSLIESDPDVFSLIGQESCRQNDEIQLIASENIVSRAVLEAQGSILTNKYAEGYPSKRYYGGCQYVDDIENIAIERAKKLFNVNFVNVQSHSGSQMNQGVFLALMHPGDSFMGLSLDSGGHLTHGSSVNMSGKWFKAIPYNVRKEDGLLDMHEIESLAIEYNPKLIIVGGTAYSRVWDWERFRSIADSIGAYLMADISHISGLVVGGQHPSPVPHCHIVTTTTHKSLRGPRGGLIMTNHAD--LAKKINSAIFPGLQGGPFMHSIAAKAVAFGEALSSEFRDYAKQIVLNSQALAKKLQFLGFDIVSGGTDNHLMLVDLRSKRMTGKRAESILGRVSITCNKNSIPFDPESPFITSGIRLGTPSGTTRGFKEKDFEYIGELIAQILD	EMNIADYDTELWQAMQQEVTRQEQHIELIASENYTSPRVMQAQGSQLTNKYAEGYPGKRYYGGCQYVDQVEQLAIDRAKALFGADYANVQPHSGSQANFAVYTALLQPGDTVLGMNLAHGGHLTHGSPVNFSGKLYNVVPYGIDAH-GRIDYDDLAAQAQRHRPKMIIGGFSAYSGVVDWARMREIANSIGAYLFVDMAHVAGLVAAGVYPNPIPHAHVVTTTTHKTLAGPRGGLILAKGLDETMYKKLNSAVFPGAQGGPLMHVIAAKAVALKEAMEPEFTRYQQQVAKNAKAMVDVFLQRGYKVVSGGTENHLFLLDLVDRQITGKEADAALGHANITVNKNSVPNDPQSPFVTSGIRIGTPAITRRGFKEAESRELAGWMCDVLD	3e-142	415	1067	388	52.84	205	180	276	2	3	71.13	44562	1	QEQMSNLIIAEDSY1PTDEVLFWSQLAIMGQ2SVCT2NEDQEH1QE6IYVT1RPAR1LMEQ4IQ10SG11DQIV1NQIL2ED3KA2NGVANDFYVA3SP5MA1QFGA1FYLT2MLHQ3STFVML1LMSN1DASH8SP2MF3WLFYKNAVIV2NGVIRDKAEHD-1LRLI1MYHDEDILEASALQ1IQERYHNR2LM2VG1GFTS3RG1WV2EA1FM1SE2DN6MFAV1IMSA1IVSA3VAGA1QVHY1SN1VI2CA1IV7ST1RA7MLTANKHGAL1-E-TLMAY2IL3IV3LA4FL2SV7FLGK2LMSESP2RTDR1AQKQ1IVVALK1SAQK1LMAVKDKVLFQLFQLR1FYDKIV5DE3MF1VL2RVSDKRRQMI3RE1EDSAIA2RHVASN2CV4…	N/A	N/A	N/A	N/A	N/A	N/A	N/A	N/A	89	89
CLIBASIA_05395	0	CLIBASIA_05395	A3M2U3#PHI:7809#AdeN#470#Acinetobacter_baumannii#increased_virulence_(hypervirulence)	A3M2U3#PHI:7809#AdeN#470#Acinetobacter_baumannii#increased_virulence_(hypervirulence)	0	0	A3M2U3#PHI:7809#AdeN#470#Acinetobacter_baumannii#increased_virulence_(hypervirulence)	A3M2U3#PHI:7809#AdeN#470#Acinetobacter_baumannii#increased_virulence_(hypervirulence)	12	725	1	677	LSIEQARKELSSLEQEISYHDDCYYQYSKPIILDSEYDALKRRCDAIAHAFPDLARSEDPNGPLNKIGGEMNLSLFKVTHSIPTLSLEKIWNIEDLRKFITRIYRFWQKKDDNSIFFTLEPKIDGTMITIRYEKGKFVYAALRGDGHSGEDVSACIRAIPTIPRVL---SLNIPEIIEVRGEVYISKNDFLALNDEMIAVGRKPYANPRNAASGILRRLNPT-DITRYLNFFVHGLGKTSEIFA-KGQYEMLQKMRCLGFPVNNGVRQANTFHGIVSYYNEMKSIRSTLPYDIDGLVYKVDEFSLQKQLGERARSPRWMISHKFAEKQASTRLLDIDIQIGRTGILTPVARLEPVNIGGALITNATLHNEDYIKGLDASGKVMRGGRDIRVGDRVLVKR…	MAITSVIEQMRQLIQLIAKHNHAYYVMDQPTISDSEYDHLFHQLKALEEQYPELVQADSPT---TKVGGQALSKFESVTHVVPMLSLGNVFNQEDLFAFARRVE---ERLPNQKVQYEVELKLDGLAISLWYENGVLVRGVTRGDGETGEDITQNVKTIRNLPKVLHSEKYEIPRLLEVRGEVLMPKSGFEKLNADQEAKGEKTFANPRNAAAGSLRQLDPNIAAARPLAFYAYGIAQCEPNHGLTTMHDSLQWLTELGFQIAERQYLCNSIQEVQQRYEQIQQERPNLQVEIDGMVVKVDDLKQQQQLGFLSREPRWATAYKFPAQAALTTVEQIDWQVGRTGTLTPVARLNPVFVGGVTVSNVTLHNIGEIHRL-----------DVRIGDTVSVYR…	3e-142	435	1119	723	36.38	263	405	398	14	55	55.05	44562	1	LMSA1ETQSAVRIKEEQLMSRSQ1EI1EL1SAYK1DNDHCA2QVYMSDKQ1IT1LS5AH1KFRHRQCLDK1ILAEHEAQFY1DE1AVRQSAEDDS1NTG-P-L-NT1IV2EQMANLLSSKLFFEKS3SVIV1TM3EGKNIVWF1IQ3RFKA1IATR1IVYER-F-W-QEKRKLDPDNNQSKIVFQFYTELV1PL1IL2TLMA1TSILRW2KN1KVFL1YRAGAVLT4HEST3VISTAQCNIVRKAT1PRTNIL1RK2-H-S-ESKLYNE2ERILIL6YLIMSP1NSDG1LEAK2DAEDMQIE1VK1RE1PTYF7SA1IS2RQ1ND1TN-IDAIATA1YP1NA1FYVAHY1LIGAKQTCSEEPINFHAG-LKTGTQMYHEDMS2KWMLRTCE3PQVINAN…	N/A	N/A	N/A	N/A	N/A	N/A	N/A	N/A	98	98
CLIBASIA_01170	0	CLIBASIA_01170	P9WGI9#PHI:7584#Rv1093_(glyA1)#1773#Mycobacterium_tuberculosis#increased_virulence_(hypervirulence)	P9WGI9#PHI:7584#Rv1093_(glyA1)#1773#Mycobacterium_tuberculosis#increased_virulence_(hypervirulence)	0	0	P9WGI9#PHI:7584#Rv1093_(glyA1)#1773#Mycobacterium_tuberculosis#increased_virulence_(hypervirulence)	P9WGI9#PHI:7584#Rv1093_(glyA1)#1773#Mycobacterium_tuberculosis#increased_virulence_(hypervirulence)	14	426	17	428	LIESDPDVFSLIGQESCRQNDEIQLIASENIVSRAVLEAQGSILTNKYAEGYPSKRYYGGCQYVDDIENIAIERAKKLFNVNFVNVQSHSGSQMNQGVFLALMHPGDSFMGLSLDSGGHLTHGSSVNMSGKWFKAIPYNVRKEDGLLDMHEIESLAIEYNPKLIIVGGTAYSRVWDWERFRSIADSIGAYLMADISHISGLVVGGQHPSPVPHCHIVTTTTHKSLRGPRGGLIMTNHADLAKKINSAIFPGLQGGPFMHSIAAKAVAFGEALSSEFRDYAKQIVLNSQALAKKLQF-----LGFDIVSGGTDNHLMLVDLRSKRMTGKRAESILGRVSITCNKNSIPFDPESPFITSGIRLGTPSGTTRGFKEKDFEYIGELIAQILDGSSSDEENHSL…	LAEVDPDIAELLAKELGRQRDTLEMIASENFVPRAVLQAQGSVLTNKYAEGLPGRRYYGGCEHVDVVENLARDRAKALFGAEFANVQPHSGAQANAAVLHALMSPGERLLGLDLANGGHLTHGMRLNFSGKLYENGFYGVDPATHLIDMDAVRATALEFRPKVIIAGWSAYPRVLDFAAFRSIADEVGAKLLVDMAHFAGLVAAGLHPSPVPHADVVSTTVHKTLGGGRSGLIVGKQ-QYAKAINSAVFPGQQGGPLMHVIAGKAVALKIAATPEFADRQRRTLSGARIIADRLMAPDVAKAGVSVVSGGTDVHLVLVDLRDSPLDGQAAEDLLHEVGITVNRNAVPNDPRPPMVTSGLRIGTPALATRGFGDTEFTEVADIIATALATGS------SV…	2e-141	414	1063	419	48.69	204	202	274	4	13	65.39	44562	1	1IA1SV3VIFASE1ILGAQK1SLCG2NR1ETILQELM5IF1SP4EQ4IV8YL1SGKR6QEYH2DVIV2IL1IRED3KA2NGVANE1VA3SP3SA1MA1QAGA1FLLH3HS2DESRFLML2SD1DASN7SMSRVL1MF3WLFYKEANIGPF1NG1RDKPEADTGH1LI2HDEAIVERSALT1IL1YFNR2LV2VA1GWTS2SP2WL1WFEARA6SEIV2YK1MLAV1IMSA1IFSA3VAGA1QL7CAHDIV1TS2TV2ST1RG1PG1GS3MVTGNKHQA-DQLY2KA4IV3LQ4FL2SV2AG4FLGKEI1LASTSP2RA1YRAQKRQRITVLLSNGSAQRAILI1KDKR1QMFA-P-D-V-A-KLA1FVDSIV6NV2MV5SDKSRPMLTD1KQRA2SDIL…	N/A	N/A	N/A	N/A	N/A	N/A	N/A	N/A	95	95
CLIBASIA_00385	0	CLIBASIA_00385	P0A452#PHI:4702#RecA#1313#Streptococcus_pneumoniae#reduced_virulence	P0A452#PHI:4702#RecA#1313#Streptococcus_pneumoniae#reduced_virulence	0	0	P0A452#PHI:4702#RecA#1313#Streptococcus_pneumoniae#reduced_virulence	P0A452#PHI:4702#RecA#1313#Streptococcus_pneumoniae#reduced_virulence	11	363	18	373	DKSKALEAALSQIQRVYGKGAIMQLGSQGSIFEGIEVVSSGSLGLDIALGIGGFPKGRIVEIYGPESSGKTTLALHTIAQSQKTGGTCAFVDAEHALDSIYARKLGVDLKNLLISQPDTGEQALEITDMLVRSGAVDIIVIDSVAALTPRAEIEGDMGESLPGMQARLMSQALRKLTSSISRSKCILVFINQMRMKIGVMFGSPETTTGGNALKFYSSVRLDIRRVGSIK----DKDSITGNQTRVKVVKNKMASPFKQVEFDIMYGEGISFFGELIDLGVKASIVDKSGAWFSFKGQRLGQGRENSKIFLRENIEIAENIESLLRQNAGLV-ADSLLQEPAINTKDDADKDDTDNVE	EREKALNDALKLIEKDFGKGSIMRLGERAE--QKVQVMSSGSLALDIALGSGGYPKGRIIEIYGPESSGKTTVALHAVAQAQKEGGIAAFIDAEHALDPAYAAALGVNIDELLLSQPDSGEQGLEIAGKLIDSGAVDLVVVDSVAALVPRAEIDGDIGDSHVGLQARMMSQAMRKLGASINKTKTIAIFINQLREKVGVMFGNPETTPGGRALKFYASVRLDVRGNTQIKGTGDQKETNVGKETKIKVVKNKVAPPFKEAVVEIMYGEGISKTGELLKIASDLDIIKKAGAWYSYKDEKIGQGSENAKKYLAEHPEIFDEIDKQVRSKFGLIDGEEVSEQDTENKKDEPKKEEAVNEE	2e-137	399	1025	358	55.03	197	154	270	3	7	75.42	44562	1	DEKRSE3ENAD2SKQL1QERKVDYF3AS2QR2SEQRGASEI-F-EQGKIVEQ1VM5GA6IS2FY5VI12LV3TAIV2SA2TE2TICA2VI7SPIA2RAKA3DNLIKDNE2IL4TS3AG3TADGMK1VIRD5ILIV1IV6TV5ED2MI1ED1LHPV1ML3LM4LM3TGSA2SNRKST1CT1LAVI4ML1ME1IV5SN4TP2NR5SA5IV1RGVNGTSQ2-G-T-G-DDQ1DESTINTV1NKQE1RKVI6MV1SP3QEVAEVFVDE8FKFT3ILDKLIGAVSKDALSD1VIDK1SA3FY1FY1GDQERKLI3RS2SA1IKFY1RA1NHIP2AFEDNE1EDSKLQLV1QSNKAF2VI-DAGDESELVLSQEEQPDATIE1TK2DEAPDK1DEDETADV1VE1	N/A	N/A	N/A	N/A	N/A	N/A	N/A	N/A	97	97
CLIBASIA_03870	0	CLIBASIA_03870	Q7WP75#PHI:2645#ClpV#518#Bordetella_bronchiseptica#reduced_virulence	Q7WP75#PHI:2645#ClpV#518#Bordetella_bronchiseptica#reduced_virulence	0	0	Q7WP75#PHI:2645#ClpV#518#Bordetella_bronchiseptica#reduced_virulence	Q7WP75#PHI:2645#ClpV#518#Bordetella_bronchiseptica#reduced_virulence	161	831	180	837	LKKYCRDLTEEARNGKLDPVIGRDDEMRRAIQVLSRRTKNNPVLIGDPGVGKTAIIEGLASRIINGDIPESLKGKRLMALDMGALIAGAKFRGEFEERLKSLLCEIRSEDGEIILFIDELHVLVGAGKTDGAMDASNLLKPSLARGELHCIGATTLDEYRKYIEKDPALARRFQSLLVGEPTVTDTISILRGLKERYEQHHKVRISDSALVSAAVLSNRYITDRFLPDKAIDLMDEASARVRMQIDTKPEVLDELDRRIICLKIEKEALKKEK--DSFSKGRLIELEKELSSLEEKSHSLTLRWQEGQRKILYVADLKKRLESMRNELAIAQRQGHFERAGELAYGLIPKTEKELDEAEKADSTAEDMVQEVVTSDNIANIVSRWTGIPVDKMLESDRE…	LARYAVDLTAQARAGRLDPVTGRDDEIRQLIDVLMRRRQNNPLLTGEAGVGKTAVVEGLALRLARGDVPAPLREVALYLLDIGLLQAGAGVKGEFEQRLRQVIDAVQGSERPIVLFIDEIHTLVGAGGAAGTGDAANLLKPALARGQLRTIGATTWAEYKQYIEKDPALTRRFQAIQVHEPDEAGARRMLRGLAGALQAHHGVLLLDEAVEAAVRLSHRYIPARQLPDKAVALLDTACARVAVSQQATPAALEDARRRIDALDLELEIAAREARLDAGPAERVAGLREQGQAARAEADALAARWERE-------AALAGQVFGLREQLDAADEQS--------APALRAALREAADALARSQGEAP-LIHPAVDAAAVAAVVADWTGIPVGRMVRDEAQ…	2e-137	432	1111	683	40.56	277	369	403	8	37	59	44562	1	1KAKR1CARV3EAEQ2NA1KR4IT5MI1RQAL1QD2SM2TRKQ3VL1IT1DEPA6IVIV4SL1ILIANR2IV1EASP1KRGEKVRA1MYAL2MI1AL1IQ3KGFVRK4EQ2KRSQLVLICDEAIVRQSGESDEGREP1IV5LI1VT5KGTADA1ATMG2SA5SA4EQ1HRCT5LWDA2RKKQ8AT4SALILQ1GH2TDVETADGTAIRSRIM4KAEGRAYLEQQA2KG1RLILSL1SE1LVVESA1AVVR2NH3TPDA1FQ5IVDA1ML1ET1SC3RAMVQSIQDQTAKT1EAVA1DEEDLADR3IDCA1KDIL1KL1AILAKAKR1KA-R-L1SAFGSPKAGE1LVIAEG1ERKEEQLGSQSALAEREAKESAHDSA1TALA2QEERGEQ-R-K-I-L…	N/A	N/A	N/A	N/A	N/A	N/A	N/A	N/A	79	79
CLIBASIA_02500	0	CLIBASIA_02500	P65882#PHI:2625__PHI:9416#PurA#28901#Salmonella_enterica#reduced_virulence__loss_of_pathogenicity	P65882#PHI:2625__PHI:9416#PurA#28901#Salmonella_enterica#reduced_virulence__loss_of_pathogenicity	0	0	P65882#PHI:2625__PHI:9416#PurA#28901#Salmonella_enterica#reduced_virulence__loss_of_pathogenicity	P65882#PHI:2625__PHI:9416#PurA#28901#Salmonella_enterica#reduced_virulence__loss_of_pathogenicity	3	431	4	431	NVVVVGLQWGDEGKGKIVDWLSENADVIVRFQGGNNAGHTLKVNDIVYKLSLLPSGVVRPDKMSIIGSSVVVDPHAFISEIESLAHQGICVTPNNLRIANNASLILSIHRDLDMLREGALSPCGAHIGTTQRGIGPAYEDRVGRRAIRVMDLTDVEHISKKIEQLLLHHN-ALRRSFGEKEVLYKTILEELMYAREKILPFMDVIWSLLERESRKGAHILFEGAQGFLLDNDHGTYPFVTSSNTMSAQASIGSGISPGSLGYVLGVVKAYTTRVGGGPFPTELKNQTGDFLKEVGKEFGTVTNRQRRCGWLDLASVRRSVIINGVKGIALTKLDVLDGLDELKICVGYRM-DGREVDFLPDDSIYHTRFEPVYMILEGWKQSTAGMRVFADLPIQARNY…	NVVVLGTQWGDEGKGKIVDLLTERAKYVVRYQGGHNAGHTLVINGEKTVLHLIPSGILRENVTSIIGNGVVLSPSALMKEMKELEDRGIPVR-ERLLLSEACPLILDYHVALDNAREKARG--AKAIGTTGRGIGPAYEDKVARRGLRVGDLFDKETFAEKLKEVMEYHNFQLVNYYKAEAVDYQKVLDDTMAVADILTSMVVDVSDLLDQARQRGDFVMFEGAQGTLLDIDHGTYPYVTSSNTTAGGVATGSGLGPRYVDYVLGILKAYSTRVGAGPFPTELFDETGEFLCKQGNEYGATTGRRRRTGWLDTVAVRRAVQLNSLSGFCLTKLDVLDGLKEVKLCVAYRMPDGREVTTTPLAADDWKGVEPIYETMPGWSESTFGVKDRSGLPQAALNY…	8e-137	402	1033	431	48.26	208	218	290	4	5	67.29	44562	1	4VL1LT12WL1ST1NR1DKVYIV2FY3NH6KVVI1DGIEVKYTKV1SH1LI3VIVL1PEDNKVMT4SNSG2VLDS1HS1FLIMSK1IMEKSE1AEHDQR2CP1TRP-NENR1RLILASNENAACSP3SDIY1RVDA2MNLA2GK1LRSGP-C-GAAKHA4QG9RK1GA2AGIL2MG2TF1VK1HTIFSAKE1ILEKQELVLMLEHY2-FAQ1RVRNSYFYGKEAKEEA1LD1KQTKIV1EDEDLT1YAAVRAEDKIILLTPSFMMVDVVDIVWSSD2EDRQEASRRQKR1ADHFIVLM6FT3NI6FY6MTSAAGQGAVSAIT3ILSG1GRSYLVGD4VIVL3TS4GA7KFNDQE2DE2KCEKVQ1KN1FY1TAVT1NG1QR2CT4LTAVSA3SA1IQIL…	N/A	N/A	N/A	N/A	N/A	N/A	N/A	N/A	99	99
CLIBASIA_03720	0	CLIBASIA_03720	Q7MBB2#PHI:10171#GroEL#2096#Mycoplasma_gallisepticum#increased_virulence_(hypervirulence)	Q7MBB2#PHI:10171#GroEL#2096#Mycoplasma_gallisepticum#increased_virulence_(hypervirulence)	0	0	Q7MBB2#PHI:10171#GroEL#2096#Mycoplasma_gallisepticum#increased_virulence_(hypervirulence)	Q7MBB2#PHI:10171#GroEL#2096#Mycoplasma_gallisepticum#increased_virulence_(hypervirulence)	3	531	2	530	AKDIKLGTAARDAIAYGVNTLAEAVKCTLGPKGRCVIIGNSFGAPRVTKDGVTVAKSISFKNHFHEVGARMIRDVATNTEDSSGDGTTTATCLAQAIYNEGRKYVTAGLNPMDIKRGIDLAVQEVVEYLKANHKKVGSREEIIQVATISANGDREIGEKIAYAMEQIGPHGIITIDQAKTATTEVRVVQGMQIDRGYISPYFVTSTERMTAEVENPYILIYDKKISALQPLLPILESATQSGRPLCIIAEDVEGDALATLVVNRVRCGLPVLAVKAPAFGDRRKEVLRDIAAVVGATVISEEIGLKLEKATIADLGSAKKVVMSKDDTTIVGGNGPSERIEGRINEIQKAIEDTKSDYDRDKLKERLAKLAGGVAVLEVGDVTEAALGEKKDRYQDSLD…	AKELTFEQQARAKLLEGINKLAKAVKITAGPKGRNALIEKKYGAPLIVNDGVTIAREIELKDPVENMGAKLIAEAAISTNDIAGDGTTTATILTHEIVNKAIEAINNGTNPVNLRIGIENAAKLVSEYLTSVSKPIKSIDEITQVGAISS-GSKFIGELIAKAMDIVGPSGVISIDDAKSFDTTLDTTDGLEFKGGYSSPYMVTDSEKMLSELANPKILVSLNKINTVKEILPLLEASVESSAPLLIVASDIAEDVVTALAINKLRGTLNVVSVKCAEFGEAQKNTLEDLAISVNTILVDSAAGIEFKDLELNKLGSAEKVIISKDKTTVINGACHKDVLAKYLNNLKAKSANLTSKYDKERITKRIANLSNGVAVIHVGGATEVAQKELKLRIEDALN…	9e-136	407	1047	530	41.13	218	310	331	2	2	62.45	44562	1	2DEILKTLFGETQAQ2DAAKILALYE1VI1TK2EK3CI1LA5CNVAIL1GENKSKFY3RLVITVKN4VI1KRSE1SEFL1NDHPFVHEENVM2RKML1RADEVA1TINS1EN1SISA8CI1ATQHAE1YV1EKGARIKEYAVITNAN1LT2MVDNILKRRI2DELN1VAQKEL1VS3KTASNVHS1KPVIGK1RIED2IT2AGTA2ASN-1DSRKEF3KL2YK2EDQIIV2HS1IV1TS2QD2TSAFTD1ETVLRDVTVTQD1MLQEIFDKRG2IS3FM2SDTS1RK1TLAS1VLEA2YK2IVYSDLKN2SNATLVQKPELI2IL2SAASTVQE1GSRA2CL1IV1ES1VIEAGE1AVLVATTA1VAVI1RKVL1CGGT1PN1LVAS2ACPAAE2DERA…	N/A	N/A	N/A	N/A	N/A	N/A	N/A	N/A	96	96
CLIBASIA_00340	0	CLIBASIA_00340	P0A1P6#PHI:7742#GlnA#28901#Salmonella_enterica#reduced_virulence	P0A1P6#PHI:7742#GlnA#28901#Salmonella_enterica#reduced_virulence	0	0	P0A1P6#PHI:7742#GlnA#28901#Salmonella_enterica#reduced_virulence	P0A1P6#PHI:7742#GlnA#28901#Salmonella_enterica#reduced_virulence	5	458	3	469	ATSIIQKIAQEKVKFIDLRFTDLQGKFRHISMNVSLFNENTLLNGITFDSSSIDGWHS-KHPNLLLIPDIETMHMDPFYAQSTVAFICNVYDPITLQPYNRDPRYTAQKAIDYLQTTDIGDTLLLGITTEFFVFDNVHCTISPIKSGFALESTEFLQN------GNNKGYDSHAKSSY-TLPPQDKLHDMRSEIVSALNNIGVQITKYHNQINDA-QHSFGLQSESLLHASDNLQKYKYSVHQVANSYCKIATFMPKPIASHNGSGMYLNMSIHKGEKAIFTGNQHDRVSLKGLYYLGGIIKHAKSLNALTNASTNSYKRLLTDSQSPTKLTYSTHNHSASCRIPYENKSDNKSIEIRFPDLSANPYLAPAAILMAGLDGIAKKIHPG----KNIDELS…	AEHVLTMLNEHEVKFVDLRFTDTKGKEQHVTIPAHQVNAEFFEEGKMFDGSSIGGWKGINESDMVLMPDASTAVIDPFFADSTLIIRCDILEPGTLQGYDRDPRSIAKRAEDYLRATGIADTVLFGPEPEFFLFDDIRFGASISGSHVAIDDIEGAWNSSTKYEGGNKGHRPGVKGGYFPVPPVDSAQDIRSEMCLVMEQMGLVVEAHHHEVATAGQNEVATRFNTMTKKADEIQIYKYVVHNVAHRFGKTATFMPKPMFGDNGSGMHCHMSLAKNGTNLFSGDKYAGLSEQALYYIGGVIKHAKAINALANPTTNSYKRLVPGYEAPVMLAYSARNRSASIRIPVVASPKARRIEVRFPDPAANPYLCFAALLMAGLDGIKNKIHPGEAMDKNLYDLP…	4e-134	397	1021	467	43.47	203	251	291	5	13	62.31	44562	1	1TESHIVILQTKMILANQEEHKE3IV6LTQK2FERQ1IVSTMINPVASHLQFV1EANETFLFLENE1IKTM2SG3DG2HKSG-IKNHEPSNDLMLV1IM2IAES1MAHVMI3YF1QD2VLAIFIIR1NDVIYLDE1IG3PG1ND4YSTI1QKKR1IE3QRTA1DG1GA2LV1LF1IPTETP3VL2NDVIHRCFTGIA1PIISKG1GHFV1LIEDSDTI1FGLAQW1-S-S-T-K-Y-E1NG3YHDRSPHGAV1SGSG1-FTPLV2QV1KSLAHQ1MI3IMVCSLAVLMNENQIM1VLQVIVTEKAYH1NHQEIVNADT1-G1HNSEFVGALTQRSFENSTLMLTHKAKSA1NELI1KI3SV2QN2NHSRYFCG1IT7IMAFSGHD5YHLCNH2ILHA1G…	N/A	N/A	N/A	N/A	N/A	N/A	N/A	N/A	99	99
CLIBASIA_00455	0	CLIBASIA_00455	Q4UZD3#PHI:3942#XC_0509#339#Xanthomonas_campestris#reduced_virulence	Q4UZD3#PHI:3942#XC_0509#339#Xanthomonas_campestris#reduced_virulence	0	0	Q4UZD3#PHI:3942#XC_0509#339#Xanthomonas_campestris#reduced_virulence	Q4UZD3#PHI:3942#XC_0509#339#Xanthomonas_campestris#reduced_virulence	1	419	1	430	MRVLLIGSGGREHALAWKIAQSPLLSELWSIPGNPGIAQHAQC--VAIDIQNHSAIIHFCQEKHIDLVVVGPELPLVNGISDALNAAGFKVFGPSQRAAKLESSKSFAKKFCTKYGIPTATYQHFSDPMKAKQYVQNKSMPIVVKADGLCAGKGVVVAATVDEATSAI-----DRCFQQINSTVIIEEYLEGFEVSFFALCDGKTAIPFTTARDHKRIHDGDIGPNTGGMGACSPALGMSQELYSTVIQKIILPTIEGMQKEQNPFQGVLFAGLMITEQG-PYLIEYNVRFGDPECQAMMMRLESDILEILNSCVHGNLHNTHINWKAEYALTVVVATKGYPEEYPHGTIISKIPQNTGTTQLFHAGTAI-VNNNLTANGGRVLSATALGKTITESREL…	MKILVIGSGGREHALAWKIAQSARVSEVLVAPGNAGTATEAKCRNVAIKVDDLDGLLALAQREAVALTVVGPEVPLVLGVVDRFHAAGLRIFGPTAKAAQLEGSKAFAKDFLARHGIPTAYYAVHTEVDAALAYVREKGAPIVVKADGLAAGKGVIVAMTLGEAEDAVRDMLSGNAFGDAGARVVIEEFLDGEEASFISMVDGTHALPMATSQDHKRVGDGDTGPNTGGMGAYSPAPVVTPEVHARVMREVVEPTVQGMIADGVPFTGFLYAGLMIDAHGAPKVIEFNVRFGDPETQPVMLRLQSDLVDLVEAAIDGTLDAAQAQWDPRPSLGVVIAAKPYPETPVTGEVITGLDAVPASAKVFHAGTALNAEGQVISAGGRVLCVAALGDSVLDAQRT…	5e-133	392	1007	430	44.88	193	226	281	5	11	65.35	44562	1	1RKVI1LV17PALRLV2LVWLSVIA3PA1IT1QTHE1QK1-R-N3DKIVQDNDHLSDAGILILHAFLCA1ERKEHAIVDA1VT5LV3NL1IVSV1ARLFNH3FLKRVI3STQARK2KQ2SG2SA3KD1CLTAKRYH5TY1QAHVFHSTDEPVMDKA1KLQA2QRNE1SGMA9CA5VI2AM1VLDG2TESD1IV-R-D-M-L-SDGRNCA1QGQDIANGSATR1IV3YF1ED1FE1VA2FIASLMCV2KTTH1IL1FMTA1ASRQ4IVHG3IT9CY3LPGVMVSTQP1LVYHSATR1IMQRKEIVIVLE2IVEQ2QIKAEDQGNV2QT1VF1FY5TDEAQH1-A1YKLV2YF8CT1APMV1ML2EQ2ILLVEDILLVNESACAVIHD1NT1HDNATAHQI…	N/A	N/A	N/A	N/A	N/A	N/A	N/A	N/A	99	99
CLIBASIA_02455	0	CLIBASIA_02455	Q1L2E2#PHI:595__PHI:2248#ALS1__Als1#13684#Parastagonospora_nodorum#reduced_virulence__loss_of_pathogenicity	Q1L2E2#PHI:595__PHI:2248#ALS1__Als1#13684#Parastagonospora_nodorum#reduced_virulence__loss_of_pathogenicity	0	0	Q1L2E2#PHI:595__PHI:2248#ALS1__Als1#13684#Parastagonospora_nodorum#reduced_virulence__loss_of_pathogenicity	Q1L2E2#PHI:595__PHI:2248#ALS1__Als1#13684#Parastagonospora_nodorum#reduced_virulence__loss_of_pathogenicity	2	397	142	547	DFEKFFKDQINYLHHEKRYRFFTELAYEQYQFPYAIHNSDEGSRKVTIWCSNDYLGMGKHPKVIENAQRTFEKCGIGAGGTRNIAGTNYYHVMLEKELATLHGKKAALIFNSGYIANWATIGTLCSQIDNIICFSDSHNHASIIEGINKARCKKVIWNHNDLEDLEKNLAATDLSIPKIIIFESIYSMDGDIAPIKEICDLADQYNAITYIDEVHAVGIHGSCGAGISE------------REGIMNRITIISGTLAKGFGTFGGYIAASENLCDFIRSFASGFIFSTSLPPAIASASVTSIQYIKQHYDERKKYLERVKQLRHSLENKAIPCIPNESHIIPIMVGDSHKCTQISNILLKEFGIYIQPINYPTVAKKKERLRVTLTPLHTDSDIEHLVS…	DYEGFYHNELDKKHKDKSYRYFNNINRMAKEFPRAHLASKE--DMVTVWCSNDYLGMGRNPHVLKSMHETLDNYGAGAGGTRNISGHNQHAVALEDTIAKLHSKEAALVFSSCYVANDATLATLGSKLPNCVILSDSLNHASMIQGIRHSGATKMVFKHNDVADLEAKLQSIPAEYPKIIAFESVYSMCGSIGPIEEICDLAEKYGAITFLDEVHAVGMYGPHGAGVAEHLDYDAHKAGRPQGTVQDRIDIITGTLGKAYGCVGGYIAGSNKLVDTIRSLAPGFIFTTSLPPATMAGAKAAIEYQVNYQGDRRLQQLHTRAVKDALEAKDIPIIPNPSHIIPVLVGNAEVAKKASDLLLEDWGIYVQPINYPTVPVGQERLRITPTPGHTREFREHLIE…	2e-132	396	1018	408	47.06	192	202	274	2	14	67.16	44562	1	1FY1KG1FYKHDNQEILNDYKLK1HKED1RS2FY1TNENLIANYREMQAYKQE2YR1IHHLNA1DK1G-S-RDKM2IV10KRHN1KH1ILEKNSAMQHRE1FLEDKNCY1IA8AS1TH1YQYHHA1MA2KDETLI1TK2GS1KE3IV1NS1GC1IV2WD2ILGA2CG1QKILDP1ICIVCIFL3HL4IM1EQ2NRKHASRGCAKT1VMIVWFNK3LVEA3KANK1AQASTIDPLASEIY4IA3IV3DC1DS1AG2KE6DEQK1NG3YFIL7IMHY1SPCH3IVSA1-H-L-D-Y-D-A-H-K-A-G-R-PRQEGGTIVMQND2TD2ST3AG1GAFY1TCFV5AG1ENNK1CV1FT3FL1SP4ST6ITAMSAAGSAVKTASA1QE1IQKVQNHYYQDGED…	N/A	N/A	N/A	N/A	N/A	N/A	N/A	N/A	99	99
CLIBASIA_04820	0	CLIBASIA_04820	A0A0F6B0W7#PHI:10102#STM14_RS07720_(sufS)#28901#Salmonella_enterica#reduced_virulence	A0A0F6B0W7#PHI:10102#STM14_RS07720_(sufS)#28901#Salmonella_enterica#reduced_virulence	0	0	A0A0F6B0W7#PHI:10102#STM14_RS07720_(sufS)#28901#Salmonella_enterica#reduced_virulence	A0A0F6B0W7#PHI:10102#STM14_RS07720_(sufS)#28901#Salmonella_enterica#reduced_virulence	1	400	1	400	MTFDINSIRKDFPILGRDIRKKPLIYFDNAASAQKPQDVIDSIMCTYSHEYANIHRGLHYMANAVTDKYEKARDKVRRFINASSVKEIIFTRSATESINLVSYGWGARHISTGDEIVLSVMEHHSNIIPWYFLRQRRGASLVWVPIDNQGFFHIDEFKNRLTERTKLIAITHMSNVLGTVIPIKEICRIAHERNIPVLVDGSQGSVHNFVDVQDIDCDWYIITGHKLYGPSGIGGLYSKESRLNEMDPFMGGSEMIADVT-QDMVTYADLPYRFEPGTPPISQAIALGVALDYVEKIDRKSIFSYERELARYVRSRLKEVRGMQLVNESLEDSPIISFRLGNIHPYDLALFLDGEGIAIRAGTHCANPLLKFLGIDSLCRASLAMYNTYEEADKFIETL…	MTFPVEKVRADFPILQREVNGLPLAYLDSAASAQKPNQVIDAESAFYRHGYAAVHRGIHTLSAQATESMENVRKQASRFINARSAEELVFVRGTTEGINLVANSWGTENIRAGDNIIISEMEHHANIVPWQMLCERKGAELRVIPLHPDGTLRLETLAALFDDRTRLLAITHVSNVLGTENPLPDMIALARQHGAKVLVDGAQAVMHHAVDVQALDCDFYVFSGHKLYGPTGIGILYVKEALLQEMPPWEGGGSMISTVSLTQGTTWAKAPWRFEAGTPNTGGIIGLGAAIDYVTSLGLDKIGDYEQMLMRYALEQLAQVPDITLYGPA-QRLGVIAFNLGKHHAYDVGSFLDNYGIAVRTGHHCAMPLMAWYGVPAMCRASLAMYNTHEEVDRLVAGL…	2e-132	389	998	401	46.13	185	214	256	2	2	63.84	44562	1	3DPIVNESKIV1KA5GQ1DEIVRNKGKL2IA1FL1NS7QNDQ3SAIEMSCATF1SR1EG2NAIV3LI1YTMLASNAAQVA1DEKSYM1KNAV1DKKQVARS5SR1VAKE1ILIV1TV1SGAT2SG4SAYNGS2ATREHN1SRTA2EN1VILI1VE4SA2IV2YQFM1RCQE1RK2SE1VRWVVI1ILDHNPQD1FTFLHRILDEETFLKANARLLFTDED2KR1IL4MV6VEIN1ILKPEDIMCIRAIL1HREQRHNGIAPK5SA1GASVVM1NHFA4DAIL3WF1IVIFTS7ST3GI2SV2SARL1NQ2DP1FWME2SGES2ASDT1TS-LQTDQMGVT1YW1DKLA1YW3PA3PNITSGQGAI1AG2VA1LI3ETKSILDGRLKDSK1FGSD2RQEM…	N/A	N/A	N/A	N/A	N/A	N/A	N/A	N/A	99	99
CLIBASIA_02315	0	CLIBASIA_02315	Q4Q4W3#PHI:5554#LmABCB3#5664#Leishmania_major#reduced_virulence	Q4Q4W3#PHI:5554#LmABCB3#5664#Leishmania_major#reduced_virulence	0	0	Q4Q4W3#PHI:5554#LmABCB3#5664#Leishmania_major#reduced_virulence	Q4Q4W3#PHI:5554#LmABCB3#5664#Leishmania_major#reduced_virulence	7	592	82	676	PSLRTLKKLWPYMWPANRWDLKVRIIGAMFSVIASKFVILGIPFLLKWVTESLIEQSTASKTTSY---LTIGIVILITSYGTMRVVNLISNHIRDFLYVEIGQGATCTLYHQVVSHVYKLSQRFHINYKVGKLSSAISNGIRSIEMIIRIIVVHLIPTILEFAISMAFLWYSYGDIYVSIMAVTVILYVWFTIITSNWRVGLSKKMNNLLHECHAKVFDTLINFETIQYFNSEKFEINRLEKYISKYKESAISVATSLGWLNFGQGLIFSIGMVITMIISSHAVYIGEQTVGDFVFINTLLTQLAIPLNILGTIYRDSRQSFIEIEELLNILNEKIEIQNAVNSKDLKIKNGHIVFNNVSFSYNHH--NCIFKGISFEIAPSKKTALIGESGVGKSTVA…	PVGRVLWKMWTYLWPHGEPKIKMLVASSVVCVLVAKVLRVAVPFWFKTIVDLLAPTTATAEAVAVAGPLTVGVFGCVVAYGICRITTFVSEELKTVLFAPVGGHASTKLSMEMFNKLHQLDLDYHLSRETGVLSKDLDRGSRAFWSLAYVLLFMIAPTIFEMGLVCYALNSQAGPQFIGIALIAVFSYVAWTFSVTNWRSKFRTRYNALESRVGGLIVDSLLNYETIKYFGSEKYESERIREETENMNKKLVILDQTMALLNFGQQLIFVVASVLSLYLATCGVLTGAMTVGDLVLVDALLMQLYMPLSYLGMIYREVQSSTQNMQAMIALLDQRSNMKDTADEKAYKYIDGTIELRNVTFEYKTELDRLVLRNLSLTIPGGKTVAFVGPSGSGKSTIF…	4e-131	402	1034	595	34.45	205	381	348	4	9	58.49	44562	1	1SVLG1TV1KW1LM1PT1ML2AHNGREWPDKLI1VMRLIVIAGSASMVFVSC1ILAVSA1FVVLIRLVGAIV2LWLF1WTVITVEDSL1IAEPQTSTTAATSAKETATVSAYV-A-G-P2IV1IVVFIGLCIVTVSA2TIMC1VIVTNTLFIV1NEHEILRKDTFV1YFVAEPIV1QGGH1TSCTTK1YSHMQEVMVFSNHKVLYHKQ1SDQLRDFY1ILNSYRKEVT1KV2SKADILSDNR1IS1SAIFEWMSILIARYIVILVLVFHMLIIA3LF1FMAGILSVMCAYFA1WNYSSQYA1DPIQYFVISG1MAALVITA1IFLS2WAFW1IFISTVST3VSGKLFSRKTKRMY1NA1LEHSERCVHGAGKLVIFV1TS1IL1FY3QK2NG3FY1ISN…	N/A	N/A	N/A	N/A	N/A	N/A	N/A	N/A	98	98
CLIBASIA_02625	0	CLIBASIA_02625	Q9HV44#PHI:10485#DnaJ#287#Pseudomonas_aeruginosa#reduced_virulence	Q9HV44#PHI:10485#DnaJ#287#Pseudomonas_aeruginosa#reduced_virulence	0	0	Q9HV44#PHI:10485#DnaJ#287#Pseudomonas_aeruginosa#reduced_virulence	Q9HV44#PHI:10485#DnaJ#287#Pseudomonas_aeruginosa#reduced_virulence	1	382	1	377	MKKADFYQVLGIDRNATDRQLKTAFRSLAMKYHPDQNRNDPEAKEKFAQISEAYEVLRDPQKRALYDQGGHEALEYGAQSQGAGGFGAGMYGNSDFSELFEGIFGGIMGSGRSYKRSSSTGEAGADLRYNLEISLEEAFSGKTVQIRFPTAVKCSTCSGSGAKPGTNPMDCNICNGSGRVYTTAQSFFSIERACSTCRGSGQIIPHPCSKCHGQGRVSEEKLLSVNVPPGVDDGTRIRLSGEGGAGVYGGAPGDLYIFISVKKHQFFKRDGADLYCTVPISIVTVAMGGTFDVATLDATHSRVTIPEGTQTGKQFRLKGKGMPVINSGRKGDLYVQVQVETPQKLNKRQRELLEEFEQISSQD--NNPQSTGFFARMKDFFDSL	MAKRDFYEVLGVERGASEADLKKAYRRLAMKYHPDRNPGDKEAEDKFKEANEAYEVLSDASKRAAYDQYGHAGVDPNMGGGAGA-----GFGGASFSDIFGDVFSDFFGGGGARGGSRGGAQRGADLRYTLDLDLEEAVRGTTVTIRVPTLVGCKTCNGSGAKPGTTPVTCTTCGGIGQV-RMQQGFFSVQQTCPRCHGTGKMISDPCGSCHGQGRVEEQKTLSVKVPAGVDTGDRIRLTGEGEAGSMGGPAGDLYVVVNVREHPIFQRDGKHLYCEVPISFADAALGGELEVPTLDG-RVKLKIPESTQTGKLFRLRGKGVAPVRGGGAGDLMCKVVVETPVNLDKRQRELLEEFRKSLQSDTSHSPKASGWFEGMKRFFDDL	7e-126	370	950	384	50.78	195	180	250	4	9	65.1	44562	1	1KA1AR3QE3IVDE1NG1TSDERAQD2TK1FY1SR8QR1RPNG1PK2KEED2AKQEIASN6RS1PAQS3LA3GY2EAAGLVEDYPGNAMQGSGQGGAAGGAG-F-G-A-G-MGYF1NGSADS2EDLI1EGGDIV1GSGDIFMF1SG1RGSAYRKGRG1SRSGTGGAEQAR6NT1EDILSD4FVSR1KT2QT2FV2AL1KG1SK2SN8NT1MVDT1NTIT1NG1SI1RQ1Y-TRTMAQ1SG3IVEQRQAT1SPTR1RH1ST1QKIM1PSHD2SGKS7SE1EQ1LT3NK2PA3DT1TD4ST3GE2VSYM2APPA4IVFVIVSN1KRKE1QPFI1KQ3AKDH3TE4IFVATDVA1ML2TEFLDE1AP3AGT-HRSVRKVLTK3GS5QL3KR3MVPAVPIVNR…	N/A	N/A	N/A	N/A	N/A	N/A	N/A	N/A	99	99
CLIBASIA_03595	0	CLIBASIA_03595	F5HAA8#PHI:424#PCK1#5207#Cryptococcus_neoformans#reduced_virulence	F5HAA8#PHI:424#PCK1#5207#Cryptococcus_neoformans#reduced_virulence	0	0	F5HAA8#PHI:424#PCK1#5207#Cryptococcus_neoformans#reduced_virulence	F5HAA8#PHI:424#PCK1#5207#Cryptococcus_neoformans#reduced_virulence	4	509	29	539	FDLEGSSRVYRNLSTSRLYEESIRREKTILTCDGALRALTGQHTGRSAFDKFIVRDSHTENDVFWEN-NKYISPADFDTLKADMLDYIKDKD-LFLQDLVACPHTKNAISVCVVTQYAWHSLFIRNLLKHKEDLGAVPNMMSLQVVVLPDF--------SADPNRHGCCSETIIAVDLTAGLILIGGTSYAGEIKKSVFTYLNHIFPER-GIMPMHCSINMDKEK-EDVALFFGLSGTGKTTLSASVDRFLIGDDEHGWSKEGVFNFEGGCYAKSINLSKETEPEIFSASCRFGTVLENVVVDECG-IPNFKDSSVTENTRAAYPLNFIHN-HAPQSIGKHPKHVIMLAADAFGVLPPVAYLNPEKAVYYFLSGYTAKVAGTEKGVLKPEATFSACFGA…	FDLD-RIHIKRNAPIASLYEDAILNEGAIISSNGALINFSGKKTGRSPKDKRIVFEETSKDDIWWGPVNIKMDEHTFEINRERAIDYLNTRENVYVFDGFAGWDPKYRIKVRVIASRAYHALFMHNMLIR-------PTPEELENFGEPDFIIYNAGQFPANRFTTGMTSTTSVGINFKRMEMVILGTEYAGEMKKGIFSVMHYLQPVKFGQLSLHSSANQGIGKNDDVTLFFGLSGTGKTTLSADANRLLIGDDEHVWSDTGVFNIEGGCYAKCINLSAEKEPEIFNA-IKFGSILENVVYNPADRKPDYDDVSITENTRCAYPIEYIPNAKIPCIADRQPSNIIMLCCDAFGVLPPVSRLTPEQAQYHFVAGYTSKTPGTEDGIVEPSPTFSTCYGQ…	4e-125	379	973	520	40.96	213	284	309	10	23	59.42	44562	1	3EDG-SRSIRHVIYK2LASPTISARS3EDSA1RLRN1KGTA1LITSCSDN3RIANLFTS1QKHK4APFK2FR2RFDESEHTTSEKND1VIFW1EGNP-V1KIYKIMSDPEAHDT1DETILNKRAEDRMALI2ILKNDTKRDE-NLVFYLVQF1LGVF1CGPWHDTP1NYAR1SK1CR1VITAQSYR1WY1SA2IMRH1LM1KIHRK-E-D-L-G-A-V-1NTMPMESE1QEVNVFVGLE3-I-I-Y-N-A-G-Q-FSP1DNPRNFRTHT1CMCT1ET1ISIVAGVIDNLFTKARGMLEIMLV1GL2SE4IM2SGVI1TSYVLMNHHYILFQ1EVRK-F1IQMLPSML1CS1IA1MQDGKIEG1-NED2AT15SDVADN1FL7GV2KDET4FI7SC4KA1…	N/A	N/A	N/A	N/A	N/A	N/A	N/A	N/A	99	99
CLIBASIA_00265	0	CLIBASIA_00265	C0RM94#PHI:11546#B0934#29459#Brucella_melitensis#unaffected_pathogenicity	C0RM94#PHI:11546#B0934#29459#Brucella_melitensis#unaffected_pathogenicity	0	0	C0RM94#PHI:11546#B0934#29459#Brucella_melitensis#unaffected_pathogenicity	C0RM94#PHI:11546#B0934#29459#Brucella_melitensis#unaffected_pathogenicity	1	342	1	339	MYKDFFVSILCLIILFFTSFSTNASILGDIKKRGFLKCGINTGLVGFAEVKANGDWKGFDVDFCRALSSAIFDDPSKIQYLPLNAKERFLALQSKQIDILSRNTDWTLLREISLGLAFRPITYFDGQGFIMHKKKGISSVSQLSGASICVQAGTTTELTLADYFKAHNMKYHPIVFERVEEIDAAYRAHRCDAYTGDISALYALKLTNDRPSEHVILPDIISKSPLAPAIIQGDTEWYNIVSWTHYAMVTAEELGITQKNINQVSKDTTNPDVQRFLGIDKSSNIGEALGLTKDWTYRIIRHMGNYGEMFDRNLGNQSELKIPRGYNALWSKGGLMYAPPIR	MKKTVWGALLAAGFALSAQGGAAADTLSTVKERGKVNCGVSQGVAGFSSPDDQGKWTGFDIDFCRAVSAAVFGDPDKVSFIPLSTKERFTALQSGTVDLLSRQTTWTLSRDAGMGIHFVGTAYYDGQGFMIRKDLGVDSALKLDGASICTEQGTTTEQNVADYFGAHNIKYEPVVIDSADGILKAFETGRCDVYTTDASALYAQRLKLAEPDAYMVLPEVISKEPLGPAVRQGDDKWFNIVRWTLFALLEAEELGITQKTV-AADLDSRKPDIRRFLGSEGDN--GQQLGLEPKWAYNIVASVGNYGEMFERTIGEGSLLKINRGINALWNKGGLMYAPPVK	4e-123	360	924	342	48.54	166	173	227	2	3	66.37	44562	1	1YK1DTFVFWVGSAIL1CALAIGIFLAFLFSTASQFGSGTANA1SDIT1GSDTIV1KE2FKLVKN2IVNSTQ1LVVA2ASESVPKDADNQ1DK1KT3VI5LV1SA1IV1DG2SD1IVQSYFLI2NSAT4LT4KGQTIV1IL3NQ1DT3LS1EDIASGLM1LIAH1RVPGITTA1FY5IMMIHR1KDKL1IVSD1VASLQK1SD5VTQEAQ5LQTNLV4KG3MI2HE1IV1FIEDRSVAEDEG1DLAK1YFREATHG3AV2GT1IA5LQKR1TKNLDARE1SDEAHYVMIV2DEIV3SE2AG2IVIR3TDEK1YF3SR2HLYF1MLVLTE9NTIVN-QAVASDKL1TSTRNK2VIQR4ISDEKGSDSNN-I-1EQAQ3TEKPDK1TA1RN1IVRAHSMV7…	N/A	N/A	N/A	N/A	N/A	N/A	N/A	N/A	100	100
CLIBASIA_01275	0	CLIBASIA_01275	Q9C1T0#PHI:200#ARG1#5507#Fusarium_oxysporum#reduced_virulence	Q9C1T0#PHI:200#ARG1#5507#Fusarium_oxysporum#reduced_virulence	0	0	Q9C1T0#PHI:200#ARG1#5507#Fusarium_oxysporum#reduced_virulence	Q9C1T0#PHI:200#ARG1#5507#Fusarium_oxysporum#reduced_virulence	3	459	4	459	KKIKSNEVNQMWGGRFSSSPSWIMEKINVSIDFDKKLFEQDILGSKVHTTMLAKQGIISSEEAQKIIEGLKVIRAEIVDGSFVFSRDLEDIHMNIEARLTSLIG-SIAGKMHTARSRNDQVALDLRLWIKEKTLEITNDLKKLLTILLDKAEEHHNTIMPGFTHLQTAQPVTFGHHCMAYVEMFGRDISRFFDSIERLDECPLGAAALAGTSFPIDRHFTAKELGFREPTRNSIDSVSDRDFILECLSHSAICAMHMSRLAEEIILWSTPQFNFVRLSDAFSTGSSIMPQKRNPDGAELVRAKTGRINGALLSLLTIMKGLPLAYSKDMQEDKEPVFDALETLQIIILAISAMIEDLTVNKDRLQEAATKSHSTATDLADWLVSHAGLPFREAHYITGC…	KKTDAPATNMLWGGRFTGGIDPLMHKYNASIIYDKALYREDVLGSIAFARANSKVGIITEDEFKMIEHGLLEVMEEWKQGTFAIMPNDEDIHTANERRLGELIGKDTAGKLHTGRSRNEQVVCDMRMWLRDRIREIDSQLVAFLQVLTKRAEAEIDYLMPGYTHLQRAQPVRWGQWIMSHAASFKQDLERLRQVFERVNLSPLGCGALAGNVFGIDRDAIAAELGFSGITLNSMNTSGDRDFIIEFLTWNSIFTSHISRWAEDLILYSTSEFGFCRLSDLYSTGSSLMPNKKNADSLELLRGKSGRAFGQMAGLMMSVKGLPTCYNKDLQEGWEPMLDSVQTVLDSLGIANGVIATMTVRPERMLAALDKTM-LATDVAEWLVRN-GCPFREAHHISGR…	6e-123	369	947	458	42.36	194	261	283	3	3	61.79	44562	1	2ITKDSANPEAVT1QMML5STSGSGPISDWPIL1EH1IY1VA2DIFY2KA1FYERQE1IV3KIVAHFTATRMALNAS1QV3STSEED1AFQKKM1IEEH2KLVEIVRMAE1IWVKDQ1ST1VAFISMRPDNLD4MTNAIN1AR2TGSE3-KSDIT3ML2AG4DE2AVLC1LM1LM1ILKREDKRTILR2TDNSDQ1KVKALF1TQIV1LTDKKR2EAHEHINDTYIL3FY4TR4TRFW1HQHWCI1ASYHVAEAMS1GKRQ1ILSE1FLFRDQSVIF2LVDNELCS3ACAG4TNSV1PG3HDFATI1KA4RSEGPI1RL2IMDNSTVSSG5LI1CF1STHWSNAS1CFATMS1MI2LW2EDIL2WY2PSQE1NG1VC4ALFY5IL2QN1RK1PA1GSAL…	N/A	N/A	N/A	N/A	N/A	N/A	N/A	N/A	97	97
CLIBASIA_04130	0	CLIBASIA_04130	A0A2Y2A0B5#PHI:10276#MurA#1280#Staphylococcus_aureus#increased_virulence_(hypervirulence)	A0A2Y2A0B5#PHI:10276#MurA#1280#Staphylococcus_aureus#increased_virulence_(hypervirulence)	0	0	A0A2Y2A0B5#PHI:10276#MurA#1280#Staphylococcus_aureus#increased_virulence_(hypervirulence)	A0A2Y2A0B5#PHI:10276#MurA#1280#Staphylococcus_aureus#increased_virulence_(hypervirulence)	1	429	1	420	MDRIKIIGGNKLNGTIAISGAKNASLPVMIASLLTSETLT-LENIPDLADVKLLIRILRSHGVEILSDSSYNDQNKSYSSTMHFRCRHIVDLTGSYDLVSKMRASFWVIGPLLAREGYARISLPGGCAIGTRPVDLFVDSLKSLGVVIKIDGGYVDARVSSKGLRGTSYTFPKVSVGATQVMMMVASLSHGDTSIYNAAREPEVVDLAHCLNSMGAKISGMGSSTITIQGVTSLSGTRHRILPDRIEAGTYAMAVAMTGGDVILKMTDSSLLKTVFKVMRQTGVDIDIIDEGIRVRWNGEKLRPVDVITAPFPGFPTDLQAQFMAMMCCAAGISHITETIFENRFMHVQELVRLGARISLSGQTARVEGVQGLRGAPVMATDLRASVSLVIAALAAQGE…	MDKIVIKGGNKLTGEVKVEGAKNAVLPILTASLLASDKPSKLVNVPALSDVETINNVLTT----LNADVTY----KKDENAVVVDATKTLNEEAPYEYVSKMRASILVMGPLLARLGHAIVALPGGCAIGSRPIEQHIKGFEALGAEIHLENGNIYAN-AKDGLKGTSIHLDFPSVGATQNIIMAASLAKGKTLIENAAKEPEIVDLANYINEMGGRITGAGTDTITINGVESLHGVEHAIIPDRIEAGTLLIAGAITRGDIFVRGAIKEHMASLVYKLEEMGVELDYQEDGIRVRAEGE-LQPVDIKTLPHPGFPTDMQSQMMALLLTANGHKVVTETVFENRFMHVAEFKRMNANINVEGRSAKLEGKSQLQGAQVKATDLRAAAALILAGLVADGK…	5e-121	361	926	430	46.05	198	221	286	5	11	66.51	44562	1	2RK1KV1IK5NT1TEIVAKIVSE5SV2VIMLIT4TA1EDTKLPTS-K1EV1IV1DA1AS2KELTLIINRNIV1RTSTH-G-V-E-ILLNSA1SVST1N-D-Q-N-1SKYDSESNTAMVHVFVRDCARTHKITVLDNLETEGASP1DELY7FIWL1IM6EL1YH1RIIVSA8TS2VIDELQFHVIDKSGLFKESA2VAVE1KHILDEGN1YNVIDY1RNV-SASKKD2RK3YITHFLPDKFVP6VNMIMI1VA3SAHK1DK1SL1YE3RK3VI4HNCYLI1SE2AGKR1ST1MA1STSD4QN2TE2SH1TVRE1RA1LI8YLALMI1VG1MI1GR2VIIFLVKRMGTADISKSELHLMKATSVLFVKYVKMLREQETM2DEIL1IYIQDEED5WANE2K-…	N/A	N/A	N/A	N/A	N/A	N/A	N/A	N/A	99	99
CLIBASIA_02500	0	CLIBASIA_02500	A0A0H2XG07#PHI:7344#PurA#1280#Staphylococcus_aureus#reduced_virulence	A0A0H2XG07#PHI:7344#PurA#1280#Staphylococcus_aureus#reduced_virulence	0	0	A0A0H2XG07#PHI:7344#PurA#1280#Staphylococcus_aureus#reduced_virulence	A0A0H2XG07#PHI:7344#PurA#1280#Staphylococcus_aureus#reduced_virulence	1	426	1	423	MTNVVVVGLQWGDEGKGKIVDWLSENADVIVRFQGGNNAGHTLKVNDIVYKLSLLPSGVVRPDKMSIIGSSVVVDPHAFISEIESLAHQGICVTPNNLRIANNASLILSIHRDLDMLREGALSPCGAHIGTTQRGIGPAYEDRVGRRAIRVMDLTDVEHISKKIEQLLLHHNA-LRRSFGEKEVLYKTILEELMYAREKILPFMDVIWSLLERESRKGAHILFEGAQGFLLDNDHGTYPFVTSSNTMSAQASIGSGISPGSLGYVLGVVKAYTTRVGGGPFPTELKNQTGDFLKEVGKEFGTVTNRQRRCGWLDLASVRRSVIINGVKGIALTKLDVLDGLDELKICVGYRMDGREVDFLPDDSIYHTRFEPVYMILEGWKQSTAGMRVFADLPIQARN…	MSSIVVVGTQWGDEGKGKITDFLAEQSDVIARFSGGNNAGHTIQFGGETYKLHLVPSGIFYKDKLAVIGNGVVVDPVALLKELDGLNERGIPTS--NLRISNRAQVILPYHLAQDEYEERLRGD--NKIGTTKKGIGPAYVDKVQRIGIRMADLLEKETFERLLKSNIEYKQAYFKGMFNETCPSFDDIFEEYYAAGQRLKEFVTDTSKILDDAFVADEKVLFEGAQGVMLDIDHGTYPFVTSSNPIAGNVTVGTGVGPTFVSKVIGVCKAYTSRVGDGPFPTELFDEDGHHIREVGREYGTTTGRPRRVGWFDSVVLRHSRRVSGITDLSINSIDVLTGLDTVKICTAYELDGKEITEYPANLDQLKRCKPIFEELPGWTEDVTNVRTLEELPENARK…	8e-121	361	926	427	42.62	182	240	267	3	5	62.53	44562	1	1TSNSVI4LT10VT1WF1SA1NQAS3VA2QS8LIKQVFNGDGIEVT3SH1LV3VIVFRYPK2MLSAIV2SNSG5HV1FLILSK1ILEDSG1ANHEQR2CPVTTSP-N-4AS1NR1SQLV2SPIY1RLDALQ1MELYRE1GRALLRSGPDC-G-ANHK4QKRK6EV1RK1GQ1RIAG2VMMA2TLDEVK1HTIFSEKRKLILEKQSLNLILEHYHKNQ1-YLFRKRGSM1GN1KTECVPLSYFKDTD1LF2LYMYYA1RGEQKRILLKPE1MVDTVDITWSSKLI1EDRDEASFRVKAGDAEHKIV7FVLM2NI12TPMISAAGQNAVSTIV1ST1IVSG1GTSFLVGSYK1LI2VC4TS3GD7KFNDQETD1DHFHLIKR3KR1FY2VT1NG1QP2CV2…	N/A	N/A	N/A	N/A	N/A	N/A	N/A	N/A	99	99
CLIBASIA_01190	0	CLIBASIA_01190	Q75WC4#PHI:852#GyrA#337#Burkholderia_glumae#chemistry_target:_resistance_to_chemical__chemistry_target:_sensitivity_to_chemical	Q75WC4#PHI:852#GyrA#337#Burkholderia_glumae#chemistry_target:_resistance_to_chemical__chemistry_target:_sensitivity_to_chemical	0	0	Q75WC4#PHI:852#GyrA#337#Burkholderia_glumae#chemistry_target:_resistance_to_chemical__chemistry_target:_sensitivity_to_chemical	Q75WC4#PHI:852#GyrA#337#Burkholderia_glumae#chemistry_target:_resistance_to_chemical__chemistry_target:_sensitivity_to_chemical	20	708	11	749	VSLRFALEERYLAYALSTIKERAIPDLRDGFKPVHRRIIHAMSEMGLDFGAAFKKSARIVGEVIGKLHPHGDQSVYDSLVRLAQPFVQRYPLISGQGNFGNIDGDSAAAYRYTEARMTQVAELILQGVDEDAVDFRDTYNEEDSEPVVFPSKFPNLLANGTSGIAVGMATSIPSHNVQEICEAALALIDNPEISIEKLLEYIIGPDFPTGGIIVESRESIVESYRLGRGGFRVRARWCVEEVGRGS-WCIVVTEIPYQVQKSRLIEKIAELIIAKRIPLLEDIRDESAEDVRIVLFPKNRSLDPDLLMESIFMLSDMETRFPLNMNVLSMGRVPQVMPLDGILKEWLAHRREVLFRRSSFRMQAIDRRVEILKGLLIAYLNIDEIIAIIRNEDKPKPV-…	ISLEEEMRRSYLDYAMSVIVGRALPDVRDGLKPVHRRVLFAMHELNNDWNRAYKKSARIVGDVIGKYHPHGDRAVYDTIVRMAQDFSLRYMLVDGQGNFGSVDGDNAAAMRYTEIRMAKIGHELLADIDKETVDFGPNYDGSESEPTILPARIPNLLINGSSGIAVGMATNIPPHNLSEVVDACHHLLANPEATVDELIEIIPAPDFPTAGIIY-GVAGVRDGYRTGRGRVVMRAATHFEEIDRGQRMAIIVDELPYQVNKRSLLERIAELVNEKKLEGISDIRDESDKSGMRVVIELKRGEVPEVVLNNLYKSTQLQDTFGMNMVALVDGQ-PKLLNLKEMLVCFLAHRREVLTRRTIYELRKARERGHVLEGLAVALANIDEFIEIIKAAPTP-PIA…	2e-120	384	987	760	34.21	260	408	402	18	92	52.89	44562	1	VI2REFEAELMERERRS2AD2LM1TV1KVEG2IL2LV3FL6IVILHF2SH1MLGNLN1FWGNAR1FY8ED4LY5QRSA3STLI2LM2PD1VSQL2PM1IVSD6NSIV3SN3YM4AI2TAQKVIAGEHLEIL1QAGDVI1EKDEAT3RGDPTN1NDEGESDE3VTVIFL1SAKRFI4AI2TS9SN2SP2VLQS1IVCVED1ACLHAH1ILDA3IASTIVEDKE1LI1YI1IPGA5GA3VYE-SGRVEASGIVVREDSG2LT3GRFVRVVM2RAWTCHVF2VIGD2SQ-RWMCA1VI1TD1IL4QN1SRRS1IL1KR4IVINAE1RKILPELGLIES6ADEKDSVGRMIR1LVFIPEKLNK1SGLEDV1DELVLVMLENSNILFYMKLSSTDQMLEQTDRT…	N/A	N/A	N/A	N/A	N/A	N/A	N/A	N/A	92	92
CLIBASIA_01190	0	CLIBASIA_01190	Q75WC5#PHI:824__PHI:6838#GyrA#337#Burkholderia_glumae#chemistry_target:_sensitivity_to_chemical__chemistry_target:_resistance_to_chemical__reduced_virulence__loss_of_pathogenicity	Q75WC5#PHI:824__PHI:6838#GyrA#337#Burkholderia_glumae#chemistry_target:_sensitivity_to_chemical__chemistry_target:_resistance_to_chemical__reduced_virulence__loss_of_pathogenicity	0	0	Q75WC5#PHI:824__PHI:6838#GyrA#337#Burkholderia_glumae#chemistry_target:_sensitivity_to_chemical__chemistry_target:_resistance_to_chemical__reduced_virulence__loss_of_pathogenicity	Q75WC5#PHI:824__PHI:6838#GyrA#337#Burkholderia_glumae#chemistry_target:_sensitivity_to_chemical__chemistry_target:_resistance_to_chemical__reduced_virulence__loss_of_pathogenicity	20	579	11	620	VSLRFALEERYLAYALSTIKERAIPDLRDGFKPVHRRIIHAMSEMGLDFGAAFKKSARIVGEVIGKLHPHGDQSVYDSLVRLAQPFVQRYPLISGQGNFGNIDGDSAAAYRYTEARMTQVAELILQGVDEDAVDFRDTYNEEDSEPVVFPSKFPNLLANGTSGIAVGMATSIPSHNVQEICEAALALIDNPEISIEKLLEYIIGPDFPTGGIIVESRESIVESYRLGRGGFRVRARWCVEEVGRGS-WCIVVTEIPYQVQKSRLIEKIAELIIAKRIPLLEDIRDESAEDVRIVLFPKNRSLDPDLLMESIFMLSDMETRFPLNMNVLSMGRVPQVMPLDGILKEWLAHRREVLFRRSSFRMQAIDRRVEILKGLLIAYLNIDEIIAIIRNEDKPKPV-…	ISLEEEMRRSYLDYAMSVIVGRALPDVRDGLKPVHRRVLFAMHELNNDWNRAYKKSARIVGDVIGKYHPHGDSAVYDTIVRMAQDFSLRYMLVDGQGNFGSVDGDNAAAMRYTEIRMAKIGHELLADIDKETVDFGPNYDGSESEPTILPARIPNLLINGSSGIAVGMATNIPPHNLSEVVDACHHLLANPEATVDELIEIIPAPDFPTAGIIY-GVAGVRDGYRTGRGRVVMRAATHFEEIDRGQRMAIIVDELPYQVNKRSLLERIAELVNEKKLEGISDIRDESDKSGMRVVIELKRGEVPEVVLNNLYKSTQLQDTFGMNMVALVDGQ-PKLLNLKEMLVCFLAHRREVLTRRTIYELRKARERGHVLEGLAVALANIDEFIEIIKAAPTP-PIA…	3e-120	384	985	621	37.2	231	318	347	10	72	55.88	44562	1	VI2REFEAELMERERRS2AD2LM1TV1KVEG2IL2LV3FL6IVILHF2SH1MLGNLN1FWGNAR1FY8ED4LY5QSSA3STLI2LM2PD1VSQL2PM1IVSD6NSIV3SN3YM4AI2TAQKVIAGEHLEIL1QAGDVI1EKDEAT3RGDPTN1NDEGESDE3VTVIFL1SAKRFI4AI2TS9SN2SP2VLQS1IVCVED1ACLHAH1ILDA3IASTIVEDKE1LI1YI1IPGA5GA3VYE-SGRVEASGIVVREDSG2LT3GRFVRVVM2RAWTCHVF2VIGD2SQ-RWMCA1VI1TD1IL4QN1SRRS1IL1KR4IVINAE1RKILPELGLIES6ADEKDSVGRMIR1LVFIPEKLNK1SGLEDV1DELVLVMLENSNILFYMKLSSTDQMLEQTDRT…	N/A	N/A	N/A	N/A	N/A	N/A	N/A	N/A	74	74
CLIBASIA_01190	0	CLIBASIA_01190	Q75WC2#PHI:850#GyrA#337#Burkholderia_glumae#chemistry_target:_resistance_to_chemical__chemistry_target:_sensitivity_to_chemical	Q75WC2#PHI:850#GyrA#337#Burkholderia_glumae#chemistry_target:_resistance_to_chemical__chemistry_target:_sensitivity_to_chemical	0	0	Q75WC2#PHI:850#GyrA#337#Burkholderia_glumae#chemistry_target:_resistance_to_chemical__chemistry_target:_sensitivity_to_chemical	Q75WC2#PHI:850#GyrA#337#Burkholderia_glumae#chemistry_target:_resistance_to_chemical__chemistry_target:_sensitivity_to_chemical	20	579	11	620	VSLRFALEERYLAYALSTIKERAIPDLRDGFKPVHRRIIHAMSEMGLDFGAAFKKSARIVGEVIGKLHPHGDQSVYDSLVRLAQPFVQRYPLISGQGNFGNIDGDSAAAYRYTEARMTQVAELILQGVDEDAVDFRDTYNEEDSEPVVFPSKFPNLLANGTSGIAVGMATSIPSHNVQEICEAALALIDNPEISIEKLLEYIIGPDFPTGGIIVESRESIVESYRLGRGGFRVRARWCVEEVGRGS-WCIVVTEIPYQVQKSRLIEKIAELIIAKRIPLLEDIRDESAEDVRIVLFPKNRSLDPDLLMESIFMLSDMETRFPLNMNVLSMGRVPQVMPLDGILKEWLAHRREVLFRRSSFRMQAIDRRVEILKGLLIAYLNIDEIIAIIRNEDKPKPV-…	ISLEEEMRRLYLDYAMSVIVGRALPDVRDGLKPVHRRVLFAMHELNNDWNRAYKKSARIVGDVIGKYHPHGDRAVYDTIVRMAQDFSLRYMLVDGQGNFGSVDGDNAAAMRYTEIRMAKIGHELLADIDKETVDFGPNYDGSESEPTILPARIPNLLINGSSGIAVGMATNIPPHNLSEVVDACHHLLANPEATVDELIEIIPAPDFPTAGIIY-GVAGVRDGYRTGRGRVVMRAATHFEEIDRGQRMAIIVDELPYQVNKRSLLERIAELVNEKKLEGISDIRDESDKSGMRVVIELKRGEVPEVVLNNLYKSTQLQDTFGMNMVALVDGQ-PKLLNLKEMLVCFLAHRREVLTRRTIYELRKARERGHVLEGLAVALANIDEFIEIIKAAPTP-PIA…	4e-120	384	985	621	37.2	231	318	348	10	72	56.04	44562	1	VI2REFEAELMERERRL2AD2LM1TV1KVEG2IL2LV3FL6IVILHF2SH1MLGNLN1FWGNAR1FY8ED4LY5QRSA3STLI2LM2PD1VSQL2PM1IVSD6NSIV3SN3YM4AI2TAQKVIAGEHLEIL1QAGDVI1EKDEAT3RGDPTN1NDEGESDE3VTVIFL1SAKRFI4AI2TS9SN2SP2VLQS1IVCVED1ACLHAH1ILDA3IASTIVEDKE1LI1YI1IPGA5GA3VYE-SGRVEASGIVVREDSG2LT3GRFVRVVM2RAWTCHVF2VIGD2SQ-RWMCA1VI1TD1IL4QN1SRRS1IL1KR4IVINAE1RKILPELGLIES6ADEKDSVGRMIR1LVFIPEKLNK1SGLEDV1DELVLVMLENSNILFYMKLSSTDQMLEQTDRT…	N/A	N/A	N/A	N/A	N/A	N/A	N/A	N/A	74	74
CLIBASIA_01995	0	CLIBASIA_01995	P40729#PHI:8731#FlhA#28901#Salmonella_enterica#reduced_virulence	P40729#PHI:8731#FlhA#28901#Salmonella_enterica#reduced_virulence	0	0	P40729#PHI:8731#FlhA#28901#Salmonella_enterica#reduced_virulence	P40729#PHI:8731#FlhA#28901#Salmonella_enterica#reduced_virulence	20	692	22	690	FAFSFCIVLIICILFLPIPTVLLDVGLASSIALSILILMVALWIEKPLEFSSFPTVLLIVTIIRLSLNIATTRAILSFGHEGYGAAGGIIAGFSSLVMSGDFVIGLVVFMILITINFIVITKGATRIAEVGARFTLDAIPGKQMAIDADLSSGLIEEEEAKRRRKELEEESAFFGAMDGASKFVRGDAIASIIITAINIVGGIVIGCFRYDMSIHHAADVFVRLSVGDGLVSQVPALIISLSAAFLVSRTTSKGSTNTAIVEQLSHYPRALLISAFFMIVLSVMPNLPAFPFIMLGGFFACAGFYVPYKNELQRLAKVAQIQEASKQNQHSAQLNFITSGVEL--VLGSLVSNRLLSS---QED--LFLRVSKIRRKFAVQYGFIVPEIKVTTDISLPE…	LAGPILILLILSMMVLPLPAFILDLLFTFNIALSIMVLLVAMFTQRTLDFAAFPTILLFTTLLRLALNVASTRIILMEGHTGAAAAGKVVEAFGHFLVGGNFAIGIVVFIILVIINFMVITKGAGRIAEVGARFVLDGMPGKQMAIDADLNAGLIGEDEAKKRRSEVTQEADFYGSMDGASKFVRGDAIAGILIMVINVVGGLLVGVLQHGMSIGSAAESYTLLTIGDGLVAQIPALVISTAAGVIVTRVSTDQDVGEQMVGQLFSNPRVMLLAAAVLGLLGMVPGMPNLVFLLFTAALLGLAWWLRGREE-----KAPEEPQPVKMPENNSVVEATWNDVQLEDSLGMEVGYRLIPMVDFQQDGELLGRIRSIRKKFAQDMGFLPPVVHIRDNMDLQP…	6e-120	376	966	681	35.24	240	421	392	6	20	57.56	44562	1	FL1FGSPFICL1VL2ILCSIMLMFV2IL1TAVFLI2VLGLLFATSFSN5LMIV1ML2LMWFITEQKRPT1ED1SASA3VI2IFVT1ILIL2SA2IV1TS2AI2SMFE2ET1YAGA3GKIVIVAEGA1SGSHLFVLMVSG1DN1VA2LI3MI2IVTI3IM6TG9TV2AGIM11SNSA3EG1ED3RK2KS1LVETEQ1SAAD1FY1AS14SG1IL1TMAV2IV3ILVLIV1CVFLRQYHDG3HGHS2DEVSFYVTRL1STVI5SA1VI3IV2LTSA1AGFVLI1ST1TVTSSTKDGQSDTVNGTEAQIM1EG2SFHSYN2AVLM1ILSA1FAFVMLIGVL1SGVMMV1NGLM1ANFLPV1ILMLLFGTGAFAFLALCGALGAFWYWVLPRYGKRNE1L-Q-…	N/A	N/A	N/A	N/A	N/A	N/A	N/A	N/A	97	97
CLIBASIA_01190	0	CLIBASIA_01190	Q75WC1#PHI:849#GyrA#337#Burkholderia_glumae#chemistry_target:_resistance_to_chemical__chemistry_target:_sensitivity_to_chemical	Q75WC1#PHI:849#GyrA#337#Burkholderia_glumae#chemistry_target:_resistance_to_chemical__chemistry_target:_sensitivity_to_chemical	0	0	Q75WC1#PHI:849#GyrA#337#Burkholderia_glumae#chemistry_target:_resistance_to_chemical__chemistry_target:_sensitivity_to_chemical	Q75WC1#PHI:849#GyrA#337#Burkholderia_glumae#chemistry_target:_resistance_to_chemical__chemistry_target:_sensitivity_to_chemical	20	579	11	620	VSLRFALEERYLAYALSTIKERAIPDLRDGFKPVHRRIIHAMSEMGLDFGAAFKKSARIVGEVIGKLHPHGDQSVYDSLVRLAQPFVQRYPLISGQGNFGNIDGDSAAAYRYTEARMTQVAELILQGVDEDAVDFRDTYNEEDSEPVVFPSKFPNLLANGTSGIAVGMATSIPSHNVQEICEAALALIDNPEISIEKLLEYIIGPDFPTGGIIVESRESIVESYRLGRGGFRVRARWCVEEVGRGS-WCIVVTEIPYQVQKSRLIEKIAELIIAKRIPLLEDIRDESAEDVRIVLFPKNRSLDPDLLMESIFMLSDMETRFPLNMNVLSMGRVPQVMPLDGILKEWLAHRREVLFRRSSFRMQAIDRRVEILKGLLIAYLNIDEIIAIIRNEDKPKPV-…	ISLEEEMRRSYLDYAMSVIVGRALPDVRDGLKPVHRRVLFAMHELNNDWNRAYKKSARIVGDVIGKYHPHGDIAVYDTIVRMAQDFSLRYMLVDGQGNFGSVDGDNAAAMRYTEIRMAKIGHELLADIDKETVDFGPNYDGSESEPTILPARIPNLLINGSSGIAVGMATNIPPHNLSEVVDACHHLLANPEATVDELIEIIPAPDFPTAGIIY-GVAGVRDGYRTGRGRVVMRAATHFEEIDRGQRMAIIVDELPYQVNKRSLLERIAELVNEKKLEGISDIRDESDKSGMRVVIELKRGEVPEVVLNNLYKSTQLQDTFGMNMVALVDGQ-PKLLNLKEMLVCFLAHRREVLTRRTIYELRKARERGHVLEGLAVALANIDEFIEIIKAAPTP-PIA…	7e-120	383	983	621	37.2	231	318	347	10	72	55.88	44562	1	VI2REFEAELMERERRS2AD2LM1TV1KVEG2IL2LV3FL6IVILHF2SH1MLGNLN1FWGNAR1FY8ED4LY5QISA3STLI2LM2PD1VSQL2PM1IVSD6NSIV3SN3YM4AI2TAQKVIAGEHLEIL1QAGDVI1EKDEAT3RGDPTN1NDEGESDE3VTVIFL1SAKRFI4AI2TS9SN2SP2VLQS1IVCVED1ACLHAH1ILDA3IASTIVEDKE1LI1YI1IPGA5GA3VYE-SGRVEASGIVVREDSG2LT3GRFVRVVM2RAWTCHVF2VIGD2SQ-RWMCA1VI1TD1IL4QN1SRRS1IL1KR4IVINAE1RKILPELGLIES6ADEKDSVGRMIR1LVFIPEKLNK1SGLEDV1DELVLVMLENSNILFYMKLSSTDQMLEQTDRT…	N/A	N/A	N/A	N/A	N/A	N/A	N/A	N/A	74	74
CLIBASIA_04725	0	CLIBASIA_04725	C5BDL7#PHI:2960#FrdA#67780#Edwardsiella_ictaluri#reduced_virulence	C5BDL7#PHI:2960#FrdA#67780#Edwardsiella_ictaluri#reduced_virulence	0	0	C5BDL7#PHI:2960#FrdA#67780#Edwardsiella_ictaluri#reduced_virulence	C5BDL7#PHI:2960#FrdA#67780#Edwardsiella_ictaluri#reduced_virulence	41	611	31	581	FKTACITKVFPTRSHTVAAQGGIAASLANMTPDSWQWHLYDTIKGSDWLGDVDAIQYLAMEAPQSVYELEHYGVPFSRNEAGKIYQRPFGGHMQNYGEGPPVQRTCAAADRTGHAILHTLYGQALK-NNAEFFIEYFALDLIINSEGCCVGVVAWQLETGEIHRFSAKLVVLATGGYGRAYFSATSAHTCTGDGAGMVARAGLPLQDMEFVQFHPTGIYGAGCLITEGARGEGGYLVNSKGERFMERYA---------PSAK--DLASRDVVSRCMMMEIREGRGVGKSK-DHIHLYLNHLDPAVLQERLPGISESARIFAGVDVTRDPIPVIPTVHYNMGGIPTNYWGEVLDANSKNPERFAPGLMAIGEAGCASVHGANRLGSNSLIDLVVFGRAAV…	LKIALISKVYPMRSHTVAAEGGSAA--VTQAHDSFDFHFHDTVAGGDWLCEQDVVDHFVHNCPREMTQLELWGCPWSRKPDGSVNVRRFGGM--------KIERTWFAADKTGFHMLHTLFQTSLKYPQIQRFDEHFVLDILVD-DGQARGVVAINMMEGTMVQIRANAVILATGGAGRVYRYNTNGGIVTGDGMGMAFKHGIPLRDMEFVQYHPTGLPGSGILMTEGCRGEGGILVNKDGYRYLQDYGLGPETPLGEPKNKYMELGPRDKVSQAFWHEWRAGRTISTPRGDVVYLDLRHLGAKKLHERLPFICELAKAYVGVDPVNEPIPVRPTAHYTMGGIETD----------QNCETRIKGLFAVGECSSVGLHGANRLGSNSLAELVVFGRVAG…	2e-119	369	947	586	39.08	229	307	327	13	50	55.8	44562	1	FL1TI1CL1TS2FY1TM7QE2IS2S-L-AVNTMQTAPH2WFQDWF1LFYH2IVKA1SG3GCDEVQ1AVIVQDYHLFAVMHENAC1QRSEVMYTEQ2HLYW1VC1FW2NKEPAD1KSIVYNQV1PR3HMM-Q-N-Y-G-E-G-P-PKVIQE2CWAF3RK2HFAHIM4YFGQQTAS2-YNPNQAIEQFR1ID1YH1AV2LIILIVNDS-ED1CQCAVR4WIQNLMEMTE1ETIMHVRQFISR1KNLA1VI5YA2AV1FRSYAN1SNAGHGTICV4AM2VAAFRKAH1LI2QR6FY4ILYP1AS1CI1IM3AC5YI3SKKD1EY1FYMLEQRD1AG-L-G-P-E-T-P-L-G-E1SKAN1-Y-MDE1AGSP2VK2RQCAMFMWMH1IW1EA2GTVIGSKTSP…	N/A	N/A	N/A	N/A	N/A	N/A	N/A	N/A	93	93
CLIBASIA_03055	0	CLIBASIA_03055	Q6D927#PHI:3843#TadA#29471#Pectobacterium_atrosepticum#reduced_virulence	Q6D927#PHI:3843#TadA#29471#Pectobacterium_atrosepticum#reduced_virulence	0	0	Q6D927#PHI:3843#TadA#29471#Pectobacterium_atrosepticum#reduced_virulence	Q6D927#PHI:3843#TadA#29471#Pectobacterium_atrosepticum#reduced_virulence	89	462	90	462	EIATLMNEIVSVKKITMSLDEQLDLFEDLCNDILGYGPLQPLIARDDIADIMVNGSNKVFIEVNGKTVETGINFRDNEQLLSVCQRIVNQVGRRVDESSPICDARLLDGSRVNVIIPPLALDGPTLTIRKFKKDKLTLDHLVSFGAVTAEGARLLQIIGRIRCNVLISGGTGSGKTTLLNCLTRYIDKDERIVTCEDTAELQLQQPHVVRLETRPPNIEGEGEITMRDLVKNCLRMRPERIILGEVRGPEVLDLLQAMNTGHDGSMGTIHANNARESFGRMEAMIAMGGFTLPSQMVREIITSSLDVIVQTQRLRDGSRRITNICEIVGMEGNVIITQDLLKYEVMGEDETGKLIGQHISTGVSRPRFWNRAAQ	QIETVIRRICDEQRLQLSRQEEEAIAAEMLDEMTGIGPIQPLLSDDSVNDILVNGAGQVFVERFGKLELSPITFIDEEHVFNTAQRIAAAVGRRIDEASPMVDARLPDGSRVNVITYPLAIDGTTISIRKFMRRNLSLEMLAERRCMSYAMADVLNKAMQARVNVIVSGGTGAGKTTLLNALSQKIGTTDRIITIEDAAELQLQQEHVVRLETRPVSAEGTGRVDQRDLMRNALRMRPDRIILGEVRGGESFDMLQAMNTGHDGSLCTVHANTSRDAIQRLENMVMMANMQLPLMAIRRQIASAVHLIVQIERMRDGMRRVVSITEVCGMENEVIQLQDLFSFNIQGMDGQGLLTGEYVQH-IQRPQFYSDKAH	3e-119	360	924	374	47.59	178	195	254	1	1	67.91	44562	1	EQ1AE1LVMINRER1VCSDVEKQKRILTQML1LRDQ1QELEDALIFAEADELMCLNDDEIMLT1YI2LI3ILASRD1DSIVAN2ML3SANGKQ2IV1VRNF2TLVEELTSGP1NT1RI1NE1QHLVLFSNVTCA3VANAQA4VI2SA2IMCV4LP8ITPY3LI2PT1LITS4KMKRDRKN1TS1DEHM1VASEFRGRACVMTSAYEAGM1RDLV1QNIKIAGMRQIA1CV2LIIV5SA7CA1TSRQYK1DGKTDTED2VI1CI2TA7PE9PVNSIA2ET1ERIVTDMQ3VMKR1CA5ED9PG1VSLF1LM11MLGC1IV3NTAS1EDSAFIGQ1ML1AN1IVAM1GAGNFMTQ2SLQMMAVI1ERIQ1TA1SALVDHVL3TIQE1LM3SM2IVTVNS1C…	N/A	N/A	N/A	N/A	N/A	N/A	N/A	N/A	77	77
CLIBASIA_01190	0	CLIBASIA_01190	Q75WC3#PHI:851#GyrA#337#Burkholderia_glumae#chemistry_target:_resistance_to_chemical__chemistry_target:_sensitivity_to_chemical	Q75WC3#PHI:851#GyrA#337#Burkholderia_glumae#chemistry_target:_resistance_to_chemical__chemistry_target:_sensitivity_to_chemical	0	0	Q75WC3#PHI:851#GyrA#337#Burkholderia_glumae#chemistry_target:_resistance_to_chemical__chemistry_target:_sensitivity_to_chemical	Q75WC3#PHI:851#GyrA#337#Burkholderia_glumae#chemistry_target:_resistance_to_chemical__chemistry_target:_sensitivity_to_chemical	20	579	11	620	VSLRFALEERYLAYALSTIKERAIPDLRDGFKPVHRRIIHAMSEMGLDFGAAFKKSARIVGEVIGKLHPHGDQSVYDSLVRLAQPFVQRYPLISGQGNFGNIDGDSAAAYRYTEARMTQVAELILQGVDEDAVDFRDTYNEEDSEPVVFPSKFPNLLANGTSGIAVGMATSIPSHNVQEICEAALALIDNPEISIEKLLEYIIGPDFPTGGIIVESRESIVESYRLGRGGFRVRARWCVEEVGRGS-WCIVVTEIPYQVQKSRLIEKIAELIIAKRIPLLEDIRDESAEDVRIVLFPKNRSLDPDLLMESIFMLSDMETRFPLNMNVLSMGRVPQVMPLDGILKEWLAHRREVLFRRSSFRMQAIDRRVEILKGLLIAYLNIDEIIAIIRNEDKPKPV-…	ISLEEEMRRSYLDYAMSVIVGRALPDVRGGLKPVHRRVLFAMHELNNDWNRAYKKSARIVGDVIGKYHPHGDIAVYDTIVRMAQDFSLRYMLVDGQGNFGSVDGDNAAAMRYTEIRMAKIGHELLADIDKETVDFGPNYDGSESEPTILPARIPNLLINGSSGIAVGMATNIPPHNLSEVVDACHHLLANPEATVDELIEIIPAPDFPTAGIIY-GVAGVRDGYRTGRGRVVMRAATHFEEIDRGQRMAIIVDELPYQVNKRSLLERIAELVNEKKLEGISDIRDESDKSGMRVVIELKRGEVPEVVLNNLYKSTQLQDTFGMNMVALVDGQ-PKLLNLKEMLVCFLAHRREVLTRRTIYELRKARERGHVLEGLAVALANIDEFIEIIKAAPTP-PIA…	8e-119	380	976	621	37.04	230	319	346	10	72	55.72	44562	1	VI2REFEAELMERERRS2AD2LM1TV1KVEG2IL2LV1DG1FL6IVILHF2SH1MLGNLN1FWGNAR1FY8ED4LY5QISA3STLI2LM2PD1VSQL2PM1IVSD6NSIV3SN3YM4AI2TAQKVIAGEHLEIL1QAGDVI1EKDEAT3RGDPTN1NDEGESDE3VTVIFL1SAKRFI4AI2TS9SN2SP2VLQS1IVCVED1ACLHAH1ILDA3IASTIVEDKE1LI1YI1IPGA5GA3VYE-SGRVEASGIVVREDSG2LT3GRFVRVVM2RAWTCHVF2VIGD2SQ-RWMCA1VI1TD1IL4QN1SRRS1IL1KR4IVINAE1RKILPELGLIES6ADEKDSVGRMIR1LVFIPEKLNK1SGLEDV1DELVLVMLENSNILFYMKLSSTDQMLEQT…	N/A	N/A	N/A	N/A	N/A	N/A	N/A	N/A	74	74
CLIBASIA_00595	0	CLIBASIA_00595	D4HUG4#PHI:9316#ArgG#552#Erwinia_amylovora#reduced_virulence	D4HUG4#PHI:9316#ArgG#552#Erwinia_amylovora#reduced_virulence	0	0	D4HUG4#PHI:9316#ArgG#552#Erwinia_amylovora#reduced_virulence	D4HUG4#PHI:9316#ArgG#552#Erwinia_amylovora#reduced_virulence	3	403	4	403	RDVKKVVLAYSGGLDTSIILKWLQVE-KGLEVIVFIADLGQGE-ELKIASDKARLLGAKEVYVKDLRREFVRDFVFPMFRANALYEGYYLLGTAIARPLIAKYLVDIANETGADAIAHGSTGKGNDQVRFELSAYSLNSDIEIIAPWRHWSFKGRQDLIDFAEKHAIPIDKNKRGEAPFSIDTNLLHSSSEGRVLEDPSQPAPEYVYKMIVSPEEAPDTPTTIRIDFQRGDPIAINGQVMSPEVLLEQLNQYGRCNGIGRIDIVENRFVGIKSRGVYETPGGTILLHAHRAIESISLDSGSAHLKDDLMSRYASIVYQGFWFSPEREMLQALIDKSQEYVEGSITLKLYKGNVMVVGRESNKSLYSDKLVTFEDDLDAYNQSDSEGFIKLHALRLRTLA…	KSIKKIVLAYSGGLDTSAIIPWLKENYGGCEVVAFVADIGQERGDLEGVEQKALQSGASECHVVDLREEFISEYVYPVLQTGALYEGTYLLGTSMARPIIAKAQVELALKVGADALCHGATGKGNDQVRFETTYTALAPQLKVVAPWREWDLRSREALLGYLKERHIPTTASL--EKIYSRDENAWHISTEGGVLESPWNAPNKDCWVWTVDPLEAPDQPEQVTVAVEKGRVVAVNGEALSPFGCLDKLNAIGARHGVGRIDIVENRLVGIKSRGCYETPGGTIMVNALRAVEQLVLDRDSFKWREQLGLEMSYVVYDGRWFAPLRKSIQASAEALAEEVNGEVVLQLYKGQVTAIQKKSANSLYSEEFATFGED-EVYDHRHAGGFIRLFSLSSRIRA…	2e-118	353	906	403	44.67	180	218	260	4	5	64.52	44562	1	RKDSVI2VI11IA1LIKP2QKVEEN-YKG1LC2IVVA1IV2LI2GEER-GED1KEIGAVSEDQ2RLLQLS2KS1VCYH1KV3RE2VIRSDEFY1FY1MVFLRQATNG5YT5ASIM3LI3YALQ1DEIL1NLEKTV4ILAC2SA11LTSTAYYTSA1NASPDQILEKIVIV4HE1SDFLKRGS1QEDA1ILDGFYALEKKEHRAH2ITDTKANSKLR-G-1AKPIFY1IR1TE1LALW1SI1ST2RG3DS1SWQNPAAPPNEKYDVCYWKVMWIT1SD1EL4TQ1TETQIVRTIVDAFVQERK1DRPVIV1IV2QEVAML2EFVGLC1EDQK2QAYI1RACRNH1IV9FL7VC8LMLVHN1HL2IV1SQILSV2SRGD1AFHKLWKRDEDQ1MGSLREYM…	N/A	N/A	N/A	N/A	N/A	N/A	N/A	N/A	99	99
CLIBASIA_00455	0	CLIBASIA_00455	F9XHT2#PHI:7446#Myco4#1047171#Zymoseptoria_tritici#reduced_virulence	F9XHT2#PHI:7446#Myco4#1047171#Zymoseptoria_tritici#reduced_virulence	0	0	F9XHT2#PHI:7446#Myco4#1047171#Zymoseptoria_tritici#reduced_virulence	F9XHT2#PHI:7446#Myco4#1047171#Zymoseptoria_tritici#reduced_virulence	1	409	5	422	MRVLLIGSGGREHALAWKIAQSPLLSELWSIPGNPGIAQHAQCV---AIDIQNHSAIIHFCQEKHIDLVVVGPELPLVNGISD--ALNAAGFKVFGPSQRAAKLESSKSFAKKFCTKYGIPTATYQHFSDPMKAKQYVQNKSMPIVVKADGLCAGKGVVVAATVDEATSAID-----RCFQQINSTVIIEEYLEGFEVSFFALCDGKTAIPFTTARDHKRIHDGDIGPNTGGMGACSPALGMSQELYSTVIQKIILPTIEGMQKEQNPFQGVLFAGLMITEQGPYLIEYNVRFGDPECQAMMMRLESDILEILNSCVHGNLHNTHINWKAEYALTVVVATKGYPEEYPHG-TIISKIPQNTGTTQLFHAGTAIVNNNLTANGGRVLSATALGKTITESR…	LRILLVGNGGREHTLAWKLAQSPLVDEIHVVPGNGGTASVNKCTNITSVSDKDFPALAQYAKSNNINLLIPGPEAPLVKGIADIFAEHAPCIPCFGPSKAAANMEGSKAFSKDFMKRHNIPTARFENFDNYEAASKHLETVDYKVVIKADGLAGGKGVVLPQTKEEAQSNLKDMMLAKEFGDAGSTVVIEECLEGDEISILSLSDGQSILSLPAAQDHKRIRDGDEGPNTGGMGTYAPAPVATKEILDEIERTTLRPTIEGMRKEGMPFVGCLFTGYMLTKNGPRLLEYNVRFGDPETQSCLSLLQSDLAELIVACTNGSLNSKTIEVASGSACTVVLAAGGYPENPKTGFEMTVNEPQN--GVNYFHAGTTVKDGKLVTSGGRVIASTATGSTLQEAR…	1e-117	352	903	420	43.1	181	226	267	5	13	63.57	44562	1	ML1VI2IV1SN5AT4IL5LVSD1LIWHSVIV3PG1IT1QSHVANQK1VT-N-I-TASIVDSIDQKNDHFSP1ILIAHQFYCAQKESKNHN1DN1VLVIVP3LA3NK2SA1-I-F1LENH1APGCFIKPVC4QKRA2KNLM1SG2SA1AS1KD1CMTKKRYHGN4TRYFQEHN1SDDNPYMEKA1KSQKYHVLQENTKVSDMYPKIV1VI5CAAG5VLAPAQ1VKDE2TQ1ANILDK-D-M-M-L-ARKCE1QGQDIANG3IV3YC3FD1VI1FIFLAS1CS2KQTSAIILPSFLTPTA1RQ5HR3IE8ATCYSA2LPGVMASTQK1LIYLSDTEVIIEQRKTITILLR6QR2QGNM2QV1VC2AT1LY1IL1EKQN2YR1IL10CT1ASMCMLMSRL1E…	N/A	N/A	N/A	N/A	N/A	N/A	N/A	N/A	96	96
CLIBASIA_01060	0	CLIBASIA_01060	B2HSW7#PHI:3820#SecA2#1781#Mycobacterium_marinum#reduced_virulence	B2HSW7#PHI:3820#SecA2#1781#Mycobacterium_marinum#reduced_virulence	0	0	B2HSW7#PHI:3820#SecA2#1781#Mycobacterium_marinum#reduced_virulence	B2HSW7#PHI:3820#SecA2#1781#Mycobacterium_marinum#reduced_virulence	4	676	39	674	HLAKLASKLLIPSNERRLRPYYAKVIAINELEKEISHLSDDSLANKTSEFKERINNGETLDDLLVPAF-AVVREVARRTLGMRPFDVQLLGGMILHKGCVAEMKTGEGKTLAAVLPVYLNALSGKGVHVVTVNDYLARRDSNTMSAIYKFLGLSTGVVFHDLSDDKRRAAYACDITYITNNELGFDYLRDNMQYRRVDMVQRGHNFAIVDEVDSIFIDEARTPLIISGPVEDHS---DLYRTIDSIIIQLHPSDY-EIDEKQRTVHFSEKGTERIEELLHGENLLKSGGLYSFENVAIVHL-INNALKSHTLFLRNRDYIVNRDEVVIIDEFTGRMMPGRRYSDGQHQALEAKERVKIQPENQTLSSITFQNYFLKYRKLSGMTGTASTEAEELANIYN…	HLSSRFWRLLGATTEKNQNRSLAQVTASADFDKEAADLNDEKLRKAAG----LLNLEDLADSADIPQFLAIAREAGERATGLRPFDVQLLGALRMLAGDVIEMATGEGKTLAGAIAAAGYALGGRHVHVVTINDYLARRDAEWMAPLLEAMDLTVGWITAESTGADRRAAYECDVTYASVNEIGFDVLRDQLVTDVADLVSPNPDVALIDEADSVLVDEALVPLVLAGTTHRETPRLEIIKLVGQLVKDKDADEYFATDADSRNVHLTEAGARKVEKALGGID------LYSEEHVGTTLTEVNVALHAHVLLQRDVHYIVRDDAVHLINASRGRIAQLQRWPDGLQAAVEAKEGIETTETGEVLDTITVQALINRYVTVCGMTGTALAAGEQLRQFYK…	6e-116	374	961	679	35.49	241	389	364	10	49	53.61	44562	1	2ASKSLRAFSWKR2IGPASTNT1RKRNLQRNPRYSYL1KQ1IT1ISNAEDLFED2IASAHD1SN1DESK1ARNKKATASGE-F-K-E-RLIL1NLGEEDTLLA1DSLALDVI1AQ1-L1VIVA2VAAGRE1TALT1ML9GAMLIRLMHLKA1CD1AI2KA8AGVALIPAVAYALGNY2SG1KRGH5VI8SANETW1SAAPILYLKEFALMGD1STTV1VWVIFTHADELSSTDGDAKD5AE2IV2IATSNV2LI3YV3NQMLQVYTRDRVVA1ML1QSRPGNHPNDFV1ILVI2VA2IVFLIV3RLTV2IVILSA1PTVTEHDRHEST-P-R-LDELIYIRKTLIVDGSQILIVIKQDLKHDPASDDE1-FEAIT1EAKDQS1TN2FLST1KA1TAERR…	N/A	N/A	N/A	N/A	N/A	N/A	N/A	N/A	76	76
CLIBASIA_04105	0	CLIBASIA_04105	Q9HU22#PHI:7634#RmlA#287#Pseudomonas_aeruginosa#reduced_virulence__loss_of_pathogenicity	Q9HU22#PHI:7634#RmlA#287#Pseudomonas_aeruginosa#reduced_virulence__loss_of_pathogenicity	0	0	Q9HU22#PHI:7634#RmlA#287#Pseudomonas_aeruginosa#reduced_virulence__loss_of_pathogenicity	Q9HU22#PHI:7634#RmlA#287#Pseudomonas_aeruginosa#reduced_virulence__loss_of_pathogenicity	2	286	4	288	KGIVLAGGSGTRLRPLTDLLSKQMLPIYNKPMIYYPVSTLMDAGIREILIISTPRDLPVLKEFLGSGEKWGVQFSYIEQLVPAGLAQSYILGAEFIGDSSSVLILGDNVFYGSDISDIFHKARARRNSATVVGCHVQNPQRYGVVEVDSSNQAISIEEKPNNPKSSFAVTGIYFYDQEVVNIARNIRPSARGELEITDVNSYYLDKGLLAVEFLREGSAWFDAGTPESLLDTAVFVRNIENRLGLYVACPEEIAYRHDFINESQFFQLIDHFGNSPYGLYLRQVV	KGIILAGGSGTRLHPATLAISKQLLPVYDKPMIYYPLSTLMLAGIREILIISTPQDTPRFQQLLGDGSNWGLDLQYAVQPSPDGLAQAFLIGESFIGNDLSALVLGDNLYYGHDFHELLGSASQRQTGASVFAYHVLDPERYGVVEFDQGGKAISLEEKPLEPKSNYAVTGLYFYDQQVVDIARDLKPSPRGELEITDVNRAYLERGQLSVEIMGRGYAWLDTGTHDSLLEAGQFIATLENRQGLKVACPEEIAYRQKWIDAAQLEKLAAPLAKNGYGQYLKRLL	8e-116	338	866	285	55.44	158	127	209	0	0	73.33	44562	1	3VI9RH1LA1DLLALI3ML2IV1ND7VL4DL12RQ1LT1VRLFKQEQFL2SD1ESKN2VLQDFLSQ1IAEV1LPVS1AD4SAYFILLI1AEES3DNSDSL1VA1IV4VLFY2SH1IFSHDEILFLHGKS1RSAQ1RQNTSG1TS1VFGACY2QLND1QE6VF1SQSGNGQK3IL4NLNE3SNFY4IL5EQ2ND3NDILRK2AP10SRYA2DEKR1LQ1AS2FILMRGER1SY2FL1AT2PHED3DETAAGVQ1VIRANTIL3LQ2YK10HQDKFW1NDEASA1FLFEQK1IADAHPFLGANKSNPG2LQ2RKQRVLVL	N/A	N/A	N/A	N/A	N/A	N/A	N/A	N/A	98	98
CLIBASIA_01525	0	CLIBASIA_01525	D4I0H1#PHI:9328#CarA#552#Erwinia_amylovora#reduced_virulence	D4I0H1#PHI:9328#CarA#552#Erwinia_amylovora#reduced_virulence	0	0	D4I0H1#PHI:9328#CarA#552#Erwinia_amylovora#reduced_virulence	D4I0H1#PHI:9328#CarA#552#Erwinia_amylovora#reduced_virulence	1	389	1	383	MTVTLPWTIKKPTAVLVLADGSVIEGMGCGATGSIQAEICFNTSLTGYQEILTDPSYLGQIVNFTFPHIGNVGVNSEDFESISRKNFKGAVGLVIKAEITEPSNYRANMHFDAWLKSCGIIGLSGIDTRALTVWIRDYGVSNSVIAHHPDGQFDLEDLKERAKNWSGLKGAELAKHVTVSQRRDWSEKIWKWGEETSFLKSS-DAKYHVVCIDYGIRSNLLRVLSSLGCRITIVGAETSYKDIMSLQPDGVLLSNGPGDPAVTSVYSSPIICKLVDSGMPMFGICLGHQLLGLALGAQTVKMYQGHHGVNHPVKNISNGTVEIVSMNHGFAIDASSLPAGLEETHISLFDSSNCGFRLIDQPVFSVQYHPESSPGPQDSYYLFSTFIDFM	MTVYSPEDVLIKSALLVLEDGTQFHGRAIGATGSAVGEVVFNTSMTGYQEILTDPSYSRQIVTLTYPHIGNVGTNSADEESTQVH----AAGLVIRDLPLIASNYRNEEGLSEYLTRHNIVAIADIDTRKLTRLLREKGAQNGCIIA--GEAPDAAAALEKARTFPGLKGMDLAKEVTTPDAYTWLQGSWTLETALPTAKAEGELPYHVVAYDYGVKRNILRMLVDRGCRLTVVPAQTSAEEVLKLNPDGVFLSNGPGDPEPCD-YAITAINRLLETNIPLFGICLGHQLLALASGAKTVKMKLGHHGGNHPVKDHDNNTVMITAQNHGFAVDDSNLPANLRVTHTSLFDHTVQGIHRTDKAAFSFQGHPEASPGPHDAAPLFDHFIELI	2e-115	344	883	390	47.69	186	196	236	4	8	60.51	44562	1	3TYLS1WETDIVKLKIPKTS1VL3AE2STVQIFEH1MRGACI5IAQVAG1IVCV4LM12LSGR3NTFL1FY7VT2EA1FE2ITSQRVKHN-F-K-G-1VA4KRADELIPTLEIPA4ANNEMEHGFLDSAEWY1KTSRCHGN1IVGALISAGD4AK2VRWLIL1DEYK1VASQ1SGVC1AIHAH-P-DGGEQAFP1LAEADALAKL1RK1KRNTWFSP4AMED3HE2VTSPQDRARYDT1SLEQKGIS1KTWLGEETEATLSPFTLA1SASE-GDEALKP4CAIY3IVRKSR1LI2VM1SVSDLR3IL1IV1GP1EQ2YAKEDEIVMLSK1QN4LF8AEVPTCSDV-1SASIPTIA1CNKR1VLDESTGNMI1ML10GA2LS2QK4YKQL4VG5NDIHSD…	N/A	N/A	N/A	N/A	N/A	N/A	N/A	N/A	98	98
CLIBASIA_01750	0	CLIBASIA_01750	N4VLC7#PHI:9476#CoTHR4_(Cob_04177)#5465#Colletotrichum_orbiculare#reduced_virulence	N4VLC7#PHI:9476#CoTHR4_(Cob_04177)#5465#Colletotrichum_orbiculare#reduced_virulence	0	0	N4VLC7#PHI:9476#CoTHR4_(Cob_04177)#5465#Colletotrichum_orbiculare#reduced_virulence	N4VLC7#PHI:9476#CoTHR4_(Cob_04177)#5465#Colletotrichum_orbiculare#reduced_virulence	1	440	25	525	MKYISTRNVDLSLGFCDTILSGLATDGGLYIPKYIPRLSEKEIKDLRGLSYQEIALFIFRLFIG-QEIKSSKLRDIVNRSYHCFRNAAVTPLIQLNANEFLLELFHGPTLSFKDIAMQFIAELMDHILEERD--------HYITIVGATSGDTGAAAIKAFAGKKRINMYILFPEGRISVVQQKQMTTSEASNINVIAVQSSFDDCQKIVKNLFSDVFFCHSVNLSGINSINWARIMAQIVYYFVSSIALGSPNRN------ISFSVPTGNFGDIFAGYMAKMMGLPIEKLIIATNENDTLVRMFDMGMYRPEI---------------------VMETTSPAMDIQIPSNFERLLF--------------EISGRN-SLLVKEAFYSLENKKYFR-ID…	QRYLSTRGEDSGFSFEEVVLKGLASDGGLFIPEHIP--TADNWQHWKDKSFPELAHEILSLYISPSEIPSNDLRGIIDRSYSTFRAPETTPLRHLKDNLYLLELFHGPTFAFKDVALQFLGNLFEYFLVRKNEGKTGKDRHHLTVVGATSGDTGSAAIYGLRGKKDVSVFILHPKGRVSPIQEAQMTTVLDENVHNLAVTGTFDDCQDIVKALFADPDINSTHNLGAVNSINWARILAQIVYYFHSYFSLVKSSENFKLGDKVRFVVPTGNFGDILAGYFAHRMGLPVDKLVIATNENDILHRFWTTGKYEKQAAPPSEATGGLAVDGAKAHEDGVKETLSPAMDILVSSNFERLLWFLAYEFASSAGMDDEWNKRQASQEVSAWLKDLKTKGGFGPVY…	4e-115	352	902	503	40.16	202	236	284	10	65	56.46	44562	1	MQKR1IL3NGVE1LSSGLFGS1CEDETVIV1SK3TS4YF2KEYH2R-L-STEAKDENIWKQDHLWRKGDLK1YFQP1IL1LHFE1FLRS1FY1GS-PQS2KP1SNKD2DG1VIND3HSCT2NAAPAEVT3IRQH1NKAD1ELFY9LFSA3IV1ML2ILAGEN1MFDEHYIF1EVERRKDN-E-G-K-T-G-K-D-R1YHIL1IV9AS3KYAGFLAR3RDIVNSMVYF2FH1EK2IV1VPVI1QEKA4SVELADSE1IVNHVNIL2QTSGST5KD3NA2SA1VPFDFICNHSSTVH2SGGAIV8ML7VH1SYIFAS1GVSKPSNSRE1-F-K-L-G-D-KIVSR1SV9FL3MF1KHMR4IVED2IV7TI1VH1MFFWDTMT1MK1REPKEQIA-A-P-P-…	N/A	N/A	N/A	N/A	N/A	N/A	N/A	N/A	94	94
CLIBASIA_01525	0	CLIBASIA_01525	Q87WP3#PHI:6594#CarA#317#Pseudomonas_syringae#reduced_virulence	Q87WP3#PHI:6594#CarA#317#Pseudomonas_syringae#reduced_virulence	0	0	Q87WP3#PHI:6594#CarA#317#Pseudomonas_syringae#reduced_virulence	Q87WP3#PHI:6594#CarA#317#Pseudomonas_syringae#reduced_virulence	9	393	1	378	IKKPTAVLVLADGSVIEGMGCGATGSIQAEICFNTSLTGYQEILTDPSYLGQIVNFTFPHIGNVGVNSEDFESISRKNFKGAVGLVIKAEITEPSNYRANMHFDAWLKSCGIIGLSGIDTRALTVWIRDYGVSNSVIAHHPDGQFDLEDLKERAKNWSGLKGAELAKHVTVSQRRDWSEKIWKWGEET-SFLKSSDAKYHVVCIDYGIRSNLLRVLSSLGCRITIVGAETSYKDIMSLQPDGVLLSNGPGDPAVTSVYSSPIICKLVDSGMPMFGICLGHQLLGLALGAQTVKMYQGHHGVNHPVKNISNGTVEIVSMNHGFAIDASSLPAGLEETHISLFDSSNCGFRLIDQPVFSVQYHPESSPGPQDSYYLFSTFIDFMHKRK	MTKP-AILALADGSIFRGEAIGADGQTVGEVVFNTAMTGYQEILTDPSYAQQIVTLTYPHIGNTGTTPEDAES----DRVWSAGLVIRDLPLVASNWRNKMSLGDYLKANNVVAIAGIDTRRLTRILREKGAQNGCIM--AGDNISEEAAIAAARGFPGLKGMDLAKEVSTKDTYEWRHSVWNLQTDSHPEIAASELPYHVVAYDYGVKVNILRMLVERGCRVTVVPAQTPASEVLAYKPDGVFLSNGPGDPEPCD-YAIKAIKQVLETEVPVFGICLGHQLLALAAGAKTVKMGHGHHGANHPVQDLDTGVVMITSQNHGFAVDESTLPGNVRAIHKSLFDGTLQGIELTDKSAFSFQGHPEASPGPNDVAPLFDRFIDAMAKRR	2e-114	341	875	386	45.6	176	201	237	5	9	61.4	44562	1	IMKT2T-1VI1VA5VIIFER1MEGACI2TD1SQITQVAG1IVCV3SALM12LAGQ3NTFL1FY5VT1VTNTSP2FA2I-S-R-K-NDFRKVGWASVA4KRADELIPTLEVPA2YW1ANNK1HSFLDGADWY2SACNGNIVIVGALISA5AR2VRWIIL1DEYK1VASQ1SGVC1AMH-H-PADGGDQNFIDSLE1DALAKIEARA1KRNGWFSP4AMED3HE1TSVTSKQDRTRYDE1SREHKSIV1KNWLGQETEDTS-HSPFELIKASA1DEALKP4CAIY3IVRKSV1LI2VM1SVSELR3IV1IV1GP1EQ1SPYAKSDEIVMLSALYQK4LF8AEVPTCSDV-1SASIPKIA1CKKQLVVLDESTGEMV1MV10GA2LA2QK4YGQH4VA4KQN…	N/A	N/A	N/A	N/A	N/A	N/A	N/A	N/A	97	97
CLIBASIA_00455	0	CLIBASIA_00455	I1RFM6#PHI:744#ADE5#5518#Fusarium_graminearum#reduced_virulence	I1RFM6#PHI:744#ADE5#5518#Fusarium_graminearum#reduced_virulence	0	0	I1RFM6#PHI:744#ADE5#5518#Fusarium_graminearum#reduced_virulence	I1RFM6#PHI:744#ADE5#5518#Fusarium_graminearum#reduced_virulence	1	409	4	423	MRVLLIGSGGREHALAWKIAQSPLLSELWSIPGNPGIA---QHAQCVAIDIQNHSAIIHFCQEKHIDLVVVGPELPLVNGISDALNAAGFKVFGPSQRAAKLESSKSFAKKFCTKYGIPTATYQHFSDPMKAKQYVQNKSMPIVVKADGLCAGKGVVVAATVDEATSA-----IDRCFQQINSTVIIEEYLEGFEVSFFALCDGKTAIPFTTARDHKRIHDGDIGPNTGGMGACSPALGMSQELYSTVIQKIILPTIEGMQKEQNPFQGVLFAGLMITEQGPYLIEYNVRFGDPECQAM--MMRLESDILEILNSCVHGNLHNTHINWKAEYALTVVVATKGYPEEYPHGTIISKIPQNTGTTQLFHAGTAIVNNNLTANGGRVLSATALGKTITESRE…	LRILLIGNGGREHALAWKLSQSSRVEQIFAVPGNGGTAGCPKTSNVTSVKAEDFAGLIKFSQENGVNLVVPGPEAPLVDGVEGWFRNAGIPCFGPSKEAARLEGSKTYSKDFMKKYNVPTAAYENFSDYTKACAYVESVDHDVVIKATGLAAGKGVILPETKEEAKAALKQIMVDKEFGDAGDEVVIEELLIGDELSVLTFCDGYAIRSLPLAQDHKRIFDGDQGPNTGGMGCYAPTNIATKELTELIDREILEPTISGMRREQQPFRGVLFTGLMITSKGPKVLEYNVRFGDPETQTVLPLLSADTDLAEIMLACANGYLDNCKLTIENKFSATVVLASGGYPGSYPKGKAMTVQTPPPG-CNIFHAGTTLDSTGLKTSGGRVIAINAVGDSLRAAVD…	2e-113	353	905	421	42.52	179	229	273	5	13	64.85	44562	1	ML1VI4SN10ILAS2PSLRLVSEEQLIWFSAIV3PG1IT1-G-C-PQKHTASQNCVVTASIVDKIAQENDHFSAAGIL1HK1CS2KNHGIVDN3VP3LA3ND1IVSEDGAWLFNRAN2FIKPVC4QKRE2KR2SG2STFYAS1KD1CMTK2GNIV3TA1QEHN3PYMT2KCQA2QENSKVSDMHPDIV1VI2DT2CA5VIVLAPAE1VKDE2TKSA1-L-K-Q-I-MIV1RKCE1QGQDIANGSDTE1IV3YL1EI1FD1VL1FVFLATLF3KYTAAIIRPSFLTPTL1RQ5HF3IQ8ACCYSA1ATLNGIMASTQK2YTSETLVIIDQRKE1ILLE3ES2QRKR2NQ2QR4AT5ESQK2YKLVIL10CT1ATMV-L-PMLMLRSLAEDST1ILLA2LM…	N/A	N/A	N/A	N/A	N/A	N/A	N/A	N/A	96	96
CLIBASIA_00595	0	CLIBASIA_00595	G4MTK2#PHI:5232#MoARG1#318829#Magnaporthe_oryzae#loss_of_pathogenicity	G4MTK2#PHI:5232#MoARG1#318829#Magnaporthe_oryzae#loss_of_pathogenicity	0	0	G4MTK2#PHI:5232#MoARG1#318829#Magnaporthe_oryzae#loss_of_pathogenicity	G4MTK2#PHI:5232#MoARG1#318829#Magnaporthe_oryzae#loss_of_pathogenicity	7	396	5	399	KVVLAYSGGLDTSIILKWLQVEKGLEVIVFIADLGQGEELKIASDKARLLGAKEVYVKDLRREFVRDFVFPMFRANALYEGYYLLGTAIARPLIAKYLVDIANETGADAIAHGSTGKGNDQVRFELSAYSLNSDIEIIAPWRH----WSFKGRQDLIDFAEKHAIPIDKNKRGEAPFSIDTNLLHSSSEGRVLEDPSQPAPEYVYKMIVSPEEAPDTPTTIRIDFQRGDP--IAINGQVMSPEV-LLEQLNQYGRCNGIGRIDIVENRFVGIKSRGVYETPGGTILLHAHRAIESISLDSGSAHLKDDLMS-RYASIVYQGFWFSPEREMLQALIDKSQEYVEGSITLKLYKGNVMVVGRESNKS-LYSDKLVTFEDDLDAYNQSDSEGFIKLHALRLR	RVCLAYSGGLDTSTILVWL-IEQGYTVVCFLANVGQEEDWDEVKAKAKKLGAEEMVILDLQKEFVEQIVFRAIQCNAIYEDRYLLGTSLARPIIARAQVRVAEQYNCQYVSHGCTGKGNDQVRFELAFKACNPSIEVIAPWRLPEFISKFQGRQDLLKYAEEKNIPVSSSPK--APWSMDDNLVHCSYEAGVLEDPDHTPPKELWTRTVDPVDAPATPQEFTVEFEKGIPTKVTVDGKETTGSVEVFKLLNKLGHDHGVGRIDIVENRFIGLKSRGCYDTPGLTIARLAHLDLEGLVMDSKVREIRDQFCTLSWSRQLYNGMYFSPEREFVENSIIFSQENVTGQVRLAVYKGNTYVLGRKSDASNLYSEQDASM-DSLEGFSPMDTTGFIEINAIRLK	3e-113	340	872	399	44.36	177	209	264	8	13	66.17	44562	1	KR1VC10IT2KV2Q-VI1KQ1LYET1IVVC1IL1DNLV2GE1EDLWKDIEAVSKDA2RKLK3KE1VMYVVIKL2RQRK3REDQFI2PRMAFIRQAC2LI2GDYR5ASIL3LI2KRYALQ1DRIV1NEEQTYGNACDQAYIVAS2SC12SAAFYKSALC1SPDS2IV5HL-P-E-F-IWSSK1KQ5ILDKFY2KEHKAN2IVDSKSNSKPRKG-E-2FW1IM1TD2LV1SC1SY1GARG5SDQHPTAP1EKYEVLYWKTMRIT1SD1EVED2DA2TQTEIFRTIVDE1QERK1DI1-T-KIVATIVND1QKVEMTSTPGES1-ELVLFEKQL2QKYL1RHCDNH1IV10VI1IL4VC1ED3GL2LALRHL2RLADIL1SGILSVLM2GKSVARHELIKR1…	N/A	N/A	N/A	N/A	N/A	N/A	N/A	N/A	97	97
CLIBASIA_00835	0	CLIBASIA_00835	Q2YRP4#PHI:5012#VtlR#235#Brucella_abortus#reduced_virulence	Q2YRP4#PHI:5012#VtlR#235#Brucella_abortus#reduced_virulence	0	0	Q2YRP4#PHI:5012#VtlR#235#Brucella_abortus#reduced_virulence	Q2YRP4#PHI:5012#VtlR#235#Brucella_abortus#reduced_virulence	3	299	5	301	FDWDKLRVFYVVARSGSFTHAAEQLHLSQSSISRQISGLETEVGIKLFYRHARGLTLTEQGSKLHRVTSEVYHKLETTQIELQESSVKPSGKLRIATTIDLGQNLLQGNLKEFLLLYPDIQIQLILDNKDIDISMDYADCAIRLRKPIQSSSLIQRKLVTIHMHAYAAPHYLKNCREPLSIQELDKHNLITFGDLIPKCMEDFNWLATVDRPIGEPRISCLQVNSYLSIMQYCVLGSGIALLPDYIVKDNPNLVRIMEDVIT-PSFTVYFCYPEALKNTGKLKAFRNFIFLKARDWKF	LDWDKLRIFHAAAEAGSFTHAAQTLHLSQSAISRQVSALEQDVGVPLFHRHARGLILTEQGETLYRTAHDVLMKLENVRSKLAESREKPSGRLRVTTTVGLGSGWLIERIQEFVELYPDVQLQLILDNEELDLTMRHADCAVRLRQP-QQPDLIQRRLFIVHMHVYASAGYVSKYGKLNSIDEIDQHRIVTFGEPAPSYLTGLNWLETAGRPDGSARIPALQVNNLLSVRRAVQRGVGIAVLPDYMADKESGLVQLLPELEEIPSFDTFFCYPEALKNSAKLHAFRDFLFSKARNWTY	3e-113	332	850	298	52.01	155	141	211	2	2	70.81	44562	1	FL6VI1YHVAVA1RESA7EQQT6SA4IV1GA2TQED2IVKP2YH6TI5SEKT1HY1VTTASHED1YLHM3TNTVQRISEK1QA2SRVE4KR2IVAT2IVDG2QSNGLW1QIGENRLIKQ2LVLE4IV1IL6KEDEIL1ILST1DRYH4IV3KQ1I-1SQSPSD4KR1VFTIIV3AV2ASPAHG1LVKSNKCYRGEKPLLN2QD1LI1KQ1NRLIIV3DELPIA1KSCYMLETDGFL3AE1VADG2ID1ESPA2SPCA4SNYL2IVMRQRYACVVQLR1SV3LV4IMVAKDDKNEPSNG2RQILMLEPDEVLIETE-I3TDVTYF9TSGA2KH3ND1IL1LS3DN1KTFY	N/A	N/A	N/A	N/A	N/A	N/A	N/A	N/A	99	99
CLIBASIA_02280	0	CLIBASIA_02280	I1RFM6#PHI:744#ADE5#5518#Fusarium_graminearum#reduced_virulence	I1RFM6#PHI:744#ADE5#5518#Fusarium_graminearum#reduced_virulence	0	0	I1RFM6#PHI:744#ADE5#5518#Fusarium_graminearum#reduced_virulence	I1RFM6#PHI:744#ADE5#5518#Fusarium_graminearum#reduced_virulence	9	344	436	770	LTYGQAGVNIEAGNRTVTQIKSAVKSTKRAGTIGEIGGFGGLFDLKKAGFVD-PILVSSSDGVGTKLKIAIETGKNDTIGIDLVAMCVNDILTHGAEPLFFLDYLATSQLNPDQATSIIKGIAAGCCQAGCALIGGETAEMPGLYHDRDYDLAGFAVGAVERK-ELLSPENVCAGDLILGLPSSGLHSNGFALVRKIISLSQLSWKDPSPISSEHSLGETLLTPTRIYVSPLLKILRKTGKIKALAHITGGGLTENIPRAIPAHLTASINLNSVEVPQIISWLSKKAHVKPAEVLRTFNCGIGMVIIVHPDNKDCIIKKFQENNENIILIGEVTQRSE	MTYAQAGVDIQAGNDFVEKIKKAVASTKRPGADAEIGGFGGEVDLSQAGYPQAPIIVGAIDGVGTKLMIAQAMKKHDTVGIDLVAMNVNDLVVQGATPVMFLDYYGCSKLDLSTAADFVQGVADGCRQAGCALVGGETAEMPGMYQKDDYDAAGCAVGTVTAEAKLPRKDDMAQDDVLLGLGSAGVHSNGFSLARRIVSHAGLSYTDAAPWDQSTTVGESLLTPTRIYVKALLPILS---EIKGLAHITGGGLVENVPRMIPESLAAEIEFGSWEIPPVFKWLREAGNVEPLEMCRTFNSGVGMVIAVEPSKANAVAQTLTDGGEKVYRIGRLTRRDQ	4e-111	344	882	338	51.48	174	159	229	3	5	67.75	44562	1	LM2GA4ND1EQ3RDTF1TEQK2SK2KA4AP1TAIDGA7LEFV2KSKQ2FYVPDQ-A2LI1SGSASI7KM2IQEATMGK1NH2IV7CN3ILLVTVHQ2ET1LVFM4LYAGTC1QK1NDPLDSQT1TASDIFIVKQ1IV1AD2CR6IV9LM1HQDKRD3LA2FC3AT1ETRAKE-AEK1LPSRPKEDNDVMCAAQGD1LVIL3PG1SA1LV5AS1VA1KR1IV1LHSAQG2WYKT1PASA1IWSDSQESHTSTLV2TS9SKPA2KP2RSK-T-G-KE2AG9TV2IV2AM2AEHS1TA1SE1NELFNG1VW1VI1QPIVIFSK2SRKEKAAGHN1KE1AL1VMLC4CS1IV4IA1HE1DSNKKADNCAIVIAKQKTFLQTEDNGNG1NKIVIYLR2ERVL1Q…	N/A	N/A	N/A	N/A	N/A	N/A	N/A	N/A	94	94
CLIBASIA_04570	0	CLIBASIA_04570	D4I0W8#PHI:9307#PyrC#552#Erwinia_amylovora#reduced_virulence	D4I0W8#PHI:9307#PyrC#552#Erwinia_amylovora#reduced_virulence	0	0	D4I0W8#PHI:9307#PyrC#552#Erwinia_amylovora#reduced_virulence	D4I0W8#PHI:9307#PyrC#552#Erwinia_amylovora#reduced_virulence	2	343	6	348	KKISLRVPDDWHLHLRDGEILKTVLRDTAKNFRRALVMPNIDPPIITVDDACAYRQRILNALPPEYDFSPLMTIYLTETTDPDDVEKGFTSQLVQAIKLYFAGSTTNSHHGIRNIDRVMPVLERMETIGMPLCIHGEILNQDIDIFDRELMFIDKILDPLRNKLPNLKIILEHITTSNGIDYV-NNATNIAGSITVHHLIINRNAIFHDGLNPHYYCLPIPKREKHRLSLRKAALSGNPRFFLGTDSAPHWDSSKESSCGCAGIYTARNALNCLAQIFEEENKLENLESFVSINGATWYGIPVNTRKISLKRREQPIIFDEKITTSTGSITIFNPIFPLYWEV	QQLTIRRPDDWHIHLRDGEMLAAVVPFTSEICGRAIVMPNLLPPVSSVAAARAYRERILTAVPAAHAFTPLMTCYLTDGLNPNEIETGFAEGVFTAAKLYPAHATTNSAHGVTRIASITAVLDRMQKIGMPLLIHGEVTDAQIDIFDREARFIETVLHPLRKQFPQLKVVCEHITTREAAAYVLEGNSYLAATITPQHLMFNRNHMLVGGIRPHLYCLPILKRNVHQQALRDAVASGHPRFFLGTDSAPHSRDRKEASCGCAGVFNAPSMLAAYATVFEEIGALGHFSAFCSENGPRFYGLPLNEGEVTLLRQPWTVPASIAVGSDGHSVVPFLAGETLNWRV	1e-110	328	842	343	46.36	159	183	222	1	1	64.72	44562	1	KQKQILSTLI1VR5LI6IM1KATA1LVRPDF1ASKENIFCRG2LI4ILDL2IVISTS1DADA1CR3QE3NT1LV1PAEAYHDA1ST4IC3EDTGTLDN1DNDEVI1KT2TASEQGLVVFQT1IA3FP1GHSA4HA2IVRTNR1DARSVIMTPA2ED2EQTK5CL4IVLTNDQADQ7LAMR2DEKTIV1DH3NKKQLF1NQ2IVIVLC5SRNEGAIADA2-LNENGANTSNYIL1GAST2VPHQ2IMIF3AHIMFLHVDG1LINR2YL5PL2ENKV1RQLQSA2KD1AVLA2NH12WSDRSDSR2SA6IVYFTN1RPNSAM1NACALY1QTIV3EINGKA1EGNHLFESSA1VC1IE2APTRWF2IL1VL1TERGKEIVST1KL1RQEPQWPTIVIPFAD…	N/A	N/A	N/A	N/A	N/A	N/A	N/A	N/A	98	98
CLIBASIA_01170	0	CLIBASIA_01170	G4MRB4#PHI:4491#SHM#318829#Magnaporthe_oryzae#reduced_virulence	G4MRB4#PHI:4491#SHM#318829#Magnaporthe_oryzae#reduced_virulence	0	0	G4MRB4#PHI:4491#SHM#318829#Magnaporthe_oryzae#reduced_virulence	G4MRB4#PHI:4491#SHM#318829#Magnaporthe_oryzae#reduced_virulence	5	391	34	449	CKNRFFQQSLIESDPDVFSLIGQESCRQNDEIQLIASENIVSRAVLEAQGSILTNKYAEGYPSKRYYGGCQYVDDIENIAIERAKKLFNVN----FVNVQSHSGSQMNQGVFLALMHPGDSFMGLSLDSGGHLTHG-----SSVNMSGKWFKAIPYNVRKEDGLLDMHEIESLAIEYNPKLIIVGGTAYSRVWDWERFRSIADSIGAYLMADISHISGLVVGGQHPSPVPHCHIVTTTTHKSLRGPRGGLIM-------TNHA-------DLAKKINSAIFPGLQGGPFMHSIAAKAVAFGEALSSEFRDYAKQIVLNSQALAKKL-------QFLGFDIVSGGTDNHLMLVDLRSKRMTGKRAESILGRVSITCNKNSIPFDPESPFITSGIRLGTPS…	SQQRLLSSHLQTADPAMYDIVEKEKQRQKHYINLIPSENFTSQAVLDALGSPMQNKYSEGYPGARYYGGNEFIDQSERLCQQRALETFGLDDKQWGVNVQALSGAPANLYVYSALMGVHDRMMGLDLPHGGHLSHGYQTPTKKISFISKYFETVPYRLDESTGYIDYDKLEELAHIYRPKIIVAGTSAYSRFIDYKRMREICDKVNAYMLADMAHISGMVAAKVIPGPFGYADIVTTTTHKSLRGPRGAMIFFRKGVRSTNPKTKAEVMYDLENPINQSVFPGHQGGPHNHTIAALAVALKQAQMPEFRAYQEQVLVNAKAFARRLGEAKGNGGGLGYKIVSGGTDNHLVLADLKPQGIDGARVERVLELVGIAANKNTVPGD-KSALTPGGLRMGTPA…	3e-110	337	863	417	42.93	179	207	253	6	31	60.67	44562	1	CSKQNQ1FLFLQSQSSH1IQETSA2DAVMFYSDLIIVGEQK1SKCQ2NKDHEY1QN2AP3IFVT1RQ3ED1QL2IPLMTQ3AS4SGKA5CNQEYFVI1DQIS1NRILACIQEQ2KLKELT1NGVLND-D-K-Q-WFG4SAHL2SAQPMA1QLGY1FYLS3HGPVGH1SRFM3SD1DPSH4TS2-Y-Q-T-P-TSKSKVINSMFSIGS1WY1KEATIV2NRVLRDKEESDT1LYLI1MYHDEKIL1SE2IHEI1NR2LI1IVVA1GTTS4VFWI1WYEK1FM1SE1AC1SKIVGN2LMML2IMSA4LM1VAGAGKQVHI1SG1VFPGHYCAHD15GALM1MF-F-R-K-G-V-R-S2HPAK-T-K-A-E-V-M-Y2AEKNKP2SQASIV3LH4FHMN1ST…	N/A	N/A	N/A	N/A	N/A	N/A	N/A	N/A	89	89
CLIBASIA_04995	0	CLIBASIA_04995	C0RE70#PHI:11554#A1479#29459#Brucella_melitensis#reduced_virulence	C0RE70#PHI:11554#A1479#29459#Brucella_melitensis#reduced_virulence	0	0	C0RE70#PHI:11554#A1479#29459#Brucella_melitensis#reduced_virulence	C0RE70#PHI:11554#A1479#29459#Brucella_melitensis#reduced_virulence	1	366	4	369	MSENNVILLVAGGTGGHVFPAVALSHELKNRGYAVYLITDRRARSFITDFPADSIYEIVSSQVRFSNPFVFWNSLVILWKAFIASLRLIKKLKPNVVVGFGGYHSISPLLAGMILRIPSMVHEQNVIMGKANRLLSWGVQIIARGLVSSQKKVLLRKIIVTGNPIRSSLIKMKDIPYQSSDLDQPFHLLVFGGSQGAKVFSDIVPKSIALIPEMQRKRLVIMQQVREDDKEKVQKQYDELGCKATLACFFKDIERYIVEANLLICRSGALTVSEIAVIGRPAILVPYPHSVDQDQLHNAYYLQEGGGAKVITENFLSPERLAEELCSAMKKPSCLVQMAKQVSMKGKPQAVLMLSDLVEKLAHVKV	LANQGVIVLAAGGTGGHLFPAEALAHELRARGWDVHLATDARAQRFVGAFAQDHVHVIRSATIAGRNPVALLKTFWSLWQGNLDSRKLFRRLKPKLVVGFGGYPTLPPLYAASNMGIPTLIHEQNAVMGRANKGLAGRVKAIAGGFLPENSGAYAAKTVITGNPVRSPVLVAAATPYTPAGKDDRFRLLVFGGSQGAQFFSQAIPAAVALLPEHERARLLITQQARKEDEASARQAYEKLGVPADVAPFFNDMPARMADAHFVIARSGASTVSEITVIGRPAMLVPFPHALDHDQAANAAALAAAGGAEVVRQADLSPQRLAEMLQSAMNELERLEQQAKAAKSVGKPDAARLLADLAEAIASGKT	4e-110	329	844	366	45.36	166	200	237	0	0	64.75	44562	1	MLSAENNQNG2LV1VA7VL3VE2SA3KRNA2YWAD1YH1IA2RA2RQSR1IVTGDA1PAAQ1SHIVYHEV1VR1SAQTVIRAFGSR2FVVAFLWLNKSTLFVWIS2KQAGFNILAD1LRRK1IFKRKR3NKVL7HPSTILSP2LY1GAMSINLMRG2STMLVI4VAIV2KR2RKLG1SAWGGR1QKIA2RG1LFVLSPSEQNKSKGVALYLARA1ITIVVI4IV2SPLVILKVMAKADAIT2QTSPSADGLK1QDPR1HR10KQVF2DQIAVI1KASAIV2IL2MHQE1KA2VL1MT2VA1EKDE1KEEAKSVAQRKQQA1DEEK2CVKP1TDLV1CP2KN1IMEPRAYRIMVAED1NHLFLV1CA4LS5AT6IM3YF2SAVL1QH2LAHA2YAYA1QA…	N/A	N/A	N/A	N/A	N/A	N/A	N/A	N/A	99	99
CLIBASIA_03855	0	CLIBASIA_03855	Q8Y4A8#PHI:9821#PrfA_(lmo2543)#1639#Listeria_monocytogenes#reduced_virulence	Q8Y4A8#PHI:9821#PrfA_(lmo2543)#1639#Listeria_monocytogenes#reduced_virulence	0	0	Q8Y4A8#PHI:9821#PrfA_(lmo2543)#1639#Listeria_monocytogenes#reduced_virulence	Q8Y4A8#PHI:9821#PrfA_(lmo2543)#1639#Listeria_monocytogenes#reduced_virulence	35	348	34	347	LTEEYAAISPIISKISIYDQKKQEEQDLHTVIGDHNSDSEIRDLAQIEVLAIEKEIRELENEINYLLLPKDTDDDKSCILEIRAGTGGSEAALFVGDLFRMYERYAALRKWKVEVLSSSDNDDGGYKEIVATISGRGVFSRMKFESGVHRVQRVPATEASGRVHTSAATVAVLPEAAEIDVDIPLEDIRIDTMRASGSGGQHVNTTDSAVRITHIPTGIMVT-SSEKSQHQNRLRAMKVLRARLYDVERKRMANERSANRKLQIGSGDRSERIRTYNFSQGRITDHRINLTLYKLEYVLQGYIDDIINPLLTAHQ	LSKEQSGITATVETYREYKNVNEQINETKELLGE-KLDDEMREMAKEEFAELQKEKTDLEERLKLLLVPKDPNDDKNVILEIRGAAGGDEAALFAGDLFRMYSKYAESRGWKVEIMDANPTGIGGYKEIIAMMNGNDAFSRMKYENGAHRVQRVPETESGGRIHTSTATVAILPEAEEVEIELHDKDIRTDTFASTGAGGQSVNTTMSAVRLTHIPTGIVVSMQDERSQLKNKDKAMKVLRARVYDKFEREAREEYDANRKSAVGTGDRSERIRTYNYPQNRVTDHRIGLTIQKLDQIMEGKLDEIIDALILEDQ	6e-110	327	839	315	50.48	159	154	225	2	2	71.43	44562	1	1TSEK1YQASAG1STPAITIVSEKTIYSRIE1DKQNKVKNQEEQEIQNDELTHKTEVLIL1DEH-NKSL1SD1IM1DELM1QKIE1VFLAAEILEQ2IKRTED2NEERILNKYL2LV3TPDN3SNCV5AGGATA2SD5VA7ESRK2AELS1KG4VILMSDSASNDPNTDGDI6VI1TMIMSN1RNGDVA5FY1SN1VA7AE2ASSG2VI3AT4VI4AE1IVDEVIDEILPHLDEK3IT2MFRAASST1SA3HS4DM4IL7MV1TS-MSQSD1KR2HLQK1RKLDRK8LV2VKEFREKRREMAARNE1RYSD4LSQAIV1ST11FYSP1GN1IV5NG2LIYQ2EDYQVILMQE1YKIL1DE2NDPA1LITLAEHD1	N/A	N/A	N/A	N/A	N/A	N/A	N/A	N/A	88	88
CLIBASIA_01525	0	CLIBASIA_01525	E0SH08#PHI:8577#CarA_(Dda3937_01390)#204038#Dickeya_dadantii#reduced_virulence	E0SH08#PHI:8577#CarA_(Dda3937_01390)#204038#Dickeya_dadantii#reduced_virulence	0	0	E0SH08#PHI:8577#CarA_(Dda3937_01390)#204038#Dickeya_dadantii#reduced_virulence	E0SH08#PHI:8577#CarA_(Dda3937_01390)#204038#Dickeya_dadantii#reduced_virulence	13	393	4	378	TAVLVLADGSVIEGMGCGATGSIQAEICFNTSLTGYQEILTDPSYLGQIVNFTFPHIGNVGVNSEDFESISRKNFKGAVGLVIKAEITEPSNYRANMHFDAWLKSCGIIGLSGIDTRALTVWIRDYGVSNSVIAHHPDGQFDLEDLKERAKNWSGLKGAELAKHVTVSQRRDWSEKIWKW-GEETSFLKSSDAKYHVVCIDYGIRSNLLRVLSSLGCRITIVGAETSYKDIMSLQPDGVLLSNGPGDPAVTSVYSSPIICKLVDSGMPMFGICLGHQLLGLALGAQTVKMYQGHHGVNHPVKNISNGTVEIVSMNHGFAIDASSLPAGLEETHISLFDSSNCGFRLIDQPVFSVQYHPESSPGPQDSYYLFSTFIDFMHKRK	SALLVLEDGTQFHGRAIGAEGTAVGEVVFNTSMTGYQEILTDPSYSRQIVTLTYPHIGNVGANKADEESPAVH----AQGLVIRDLPLIASNYRSEESLSDYLKRNNIVAIADIDTRKLTRLLREKGAQNGCII--AGDAPDAALALEKAKAFPGLKGMDLAKEVTTHSSYSWLQGSWTLEGELPAAKEESELPYHVVAYDYGVKRNILRMLVDRGCRLTVVPAQTPAEEVLKLNPDGIFLSNGPGDPEPCD-YAISAIKTFLETEIPVFGICLGHQLLALASGAKTVKMKFGHHGGNHPVKDLDGNRVMITAQNHGFAVDETSLPATLRTTHKSLFDGSLQGIHRTDKAAFSFQGHPEASPGPHDAAPLFDHFIELIESYR	1e-109	329	843	382	46.86	179	195	232	4	8	60.73	44562	1	TS1VL3AE2STVQIFEH1MRGACI2TE1STIAQVAG1IVCV4LM12LSGR3NTFL1FY7VA1SKEA1FE2IPSARVKHN-F-K-G-1VQ4KRADELIPTLEIPA4ASNEMEHSFLDSADWY2SRCNGN1IVGALISAGD4AK2VRWLIL1DEYK1VASQ1SGVC1AIH-H-PADGGDQAFP1LAEADLLAKL1RK2NAWFSP4AMED3HE2VTSHQSRSRYDS1SLEQKGIS1KTWL-E2ELTPSAFALKKESE1DEALKP4CAIY3IVRKSR1LI2VM1SVSDLR3IL1IV1GP1EQ1SPYAKEDEIVMLSK1QN3VILF8AEVPTCSDV-1SASIPSIA1CKKTLFVLDESTGEMI1MV10GA2LS2QK4YKQF4VG5NDILSDNGGNTR1EM1VTS…	N/A	N/A	N/A	N/A	N/A	N/A	N/A	N/A	96	96
CLIBASIA_01470	0	CLIBASIA_01470	Q5NH02#PHI:4732#FTT0673p/prsAp#263#Francisella_tularensis#unaffected_pathogenicity	Q5NH02#PHI:4732#FTT0673p/prsAp#263#Francisella_tularensis#unaffected_pathogenicity	0	0	Q5NH02#PHI:4732#FTT0673p/prsAp#263#Francisella_tularensis#unaffected_pathogenicity	Q5NH02#PHI:4732#FTT0673p/prsAp#263#Francisella_tularensis#unaffected_pathogenicity	1	309	5	315	MKIFAGNSNRNLAQEICDYLHTSLGKASVTYFSDREVFVEIGENVRGEDVFIVQSTSCPANDYLMELLIMIDAVRRSSARRITGVIPYFGYCRQDRKP-SPRTPISAKLVANLITQAGADRVIMLDLHAGQVQGFFDIPTDNLYALPI-LERDIKERNDISNLMVVSPDVGGVVRARALAKRLGCLLAIVDKRREHPGKIEVMNIIGKVEGKDCILIDDIVDTGGTLCGAADALYEQ-GALSVTAYITHGVLSSSSIERIEKSKMKELVITDSIQPTDLVKSSAKIRILTIAQLMGEAINRTFEERSISSLF	LMIFSGNASKKLASEVAKELGATLGNATVDRFKDGEIHVVLNENVRGKDVFVIQST-CPPSDNLMELILLIDALKRSSAERVTAVLPYFGYARQDRRSKSARVPISAKVVANLLQAVGLDRILSVDIHAEQIQGFFDIPFDNAFATKIFLEYVRKNPEKYQNIKIVSPDMGGVVRARSVAKNLGVEIAVVDKRRPKPNVAEVMNIIGEVDGKHCILVDDIMDTGGTMCQAAKALIEKGGAAKVSAFCIHPLLSGDAIKNIEDSAIDELIVTDSIPLKPHAEACSKIKVITLAPLLAQIVEKTNGEESVSDIF	2e-109	323	828	312	51.92	162	146	226	4	4	72.44	44562	1	MLKM2AS2SANSRKNK2QS1IVCADKYE1HGTAST2KN1ST1TDYR1SK1RG1VIFH1EVILGN5EK3IVVI3S-2APNS1YN4LIILML3VLRK4RE1IV1GA1IL5CA4KRPS-K1PA1TV5LV4ILTQQAAV1AL2VIILMSLV1LI2GE1VI7TF2LAYF1LTPK1-F2RYDVIR1ENRPNEDKIYSQ1LIMKVI4VM7ASLV2RN2CVLELI1IV5EPHK1GNKVIA7KE1ED2DH3IV3VM5LM1GQ2DK2YI1QK-G2LASK1TS1YFICTI1GPVL2SGSDSA1EKRN2KD1KAMIKD2VIIV4QPPLTKDPLHVAKESASCAS2RKIVLI1IL1QP1MLGAEQAIIVNERK1FNEG1RE1IV1SDLI1	N/A	N/A	N/A	N/A	N/A	N/A	N/A	N/A	99	99
CLIBASIA_02695	0	CLIBASIA_02695	Q4UY20#PHI:3943#XC_0979#339#Xanthomonas_campestris#reduced_virulence	Q4UY20#PHI:3943#XC_0979#339#Xanthomonas_campestris#reduced_virulence	0	0	Q4UY20#PHI:3943#XC_0979#339#Xanthomonas_campestris#reduced_virulence	Q4UY20#PHI:3943#XC_0979#339#Xanthomonas_campestris#reduced_virulence	2	330	3	333	MQDLENSVAMMLQAGKGILAADESNATIQKRFKAIHLESTENSRRDYREMLFRAKDAMQYISSILLYEETLYQNAQDGTSFVDLISSSGVLVGIKVDRGLKPYPLYPGEHITVGLDDLDVRLKQYKDAGARVAKWRVVLSVSDVLPSMTVVKANMHILARYAVLCQNAGLVPIVEPEVLMEGDHTIERCAEVTEFVLRTLFNELYTMRVCFEGLVLKSNMILPGKSA-PQVSDEEIASNTIKIFKRVVPCAVQGIAFLSGGQSEQDATARLSAMNSMGDCPWRLSFSYGRALQESVLRAWNGK-QDNVVVAQRVLSHRAHMNSLATKGCWK	IEQLAETAQAMVAPGKGIIAIDESTSTIAKRFSGVGIENTEENRRAYRELLLTTPKLSDYISGAILFDETIRQKTKDGVPFAKYMADHGIIPGIKVDKGAQPLAGMPGELVTEGLDGLRARLEEYYTLGARFAKWRAVINIGEDIPSGTCIEANAHALARYAALCQEQGLVPMVEPEVIMDGDHDIETCYEVTEATLRSLFGALYEQNVVLEGTILKASMVISGKGCEEQASVEEVAESTVMCLKSTVPAILPGIVFLSGGQTDEQSTAHLNEMHQLGNLPWPLSFSYGRAMQQAALKLWSKDMTGNYAKAQQIIYERAKENGLAALGKWK	2e-109	325	833	331	46.83	155	174	216	2	2	65.26	44562	1	MIQEDQ1EANESTVAAQMA1LVQAAP4LI1AI3NTAS2QA3KSAGIVHGLI1SN2NESN2DA3ML1FLRTATKPDKALMSQD3SGIALI1YFED2LIYR1NKATQK2TVSP1VADKLYIMSASDSH1VILIVP5RK1LAKQ1YLPALGYM3HLIV1VE3DG1DRVA2KEQE1KYDTAL3VF4VA1LISNVISGDEVDLI2MG1VCVIKE2MA1IA5VA3NEAQ4IM5LI1ED3TD2RT1AY4FAVT2TS2NGEA2TEMQRN1CVFL2LTVI2SANS1IVLIPS2SGAC-EPE1VA1DV2IV1SENS1IVKMICFL1RSVT2CAAIVLQP2AV6STEDQEDQAS2RH1SNAE1NHSQML1DNCL2RP8LM1EQSAVA1RKAL1NSGKKD-MQTDG1VYVA…	N/A	N/A	N/A	N/A	N/A	N/A	N/A	N/A	97	97
CLIBASIA_03015	0	CLIBASIA_03015	A0A384JMC8#PHI:9835#Bcpgd#40559#Botrytis_cinerea#reduced_virulence	A0A384JMC8#PHI:9835#Bcpgd#40559#Botrytis_cinerea#reduced_virulence	0	0	A0A384JMC8#PHI:9835#Bcpgd#40559#Botrytis_cinerea#reduced_virulence	A0A384JMC8#PHI:9835#Bcpgd#40559#Botrytis_cinerea#reduced_virulence	4	455	8	459	ADIGIIGLGSMGSNLSLNILDKGFRLAVYNKDFELTDVFIKKISGLSQKVIVTKNLEQMVEAVCKPRKILMMVTDGDPVDQLIDKLKPLLSPEDILLDGGNSHFCDTQIRSLQLSEKGIYFIGIGVSGGVKGARSGASLMVGGNEKAYNRVENILLSISAKYQNSPCCALLGPDGSGHFVKMIHNGIEYANMQLIADIYGILRDSLNKNPLEISHLFSKWDTGKLSSYLIKITAEILSSSDTITGMPIIDVICDKASQKGTGIRSIIEGHKLSSSMTITETAIFARNLSLYRDE---SKKMQSFFNPSSHFPLKCFDSFVKDLENALYASTILSFTQGFWVIGKSSEKYSWSLSLATIARIWRAGCIIRSQILNDIVKSLTEDPSSTNLLNIPSISEKV…	GDFGLIGLAVMGQNIILNAADHGFNVIAFNRTTSKVDRFLEN-EAKGKSIEGAHSIEEFCAKLKKPRRIMLLVMAGKPVDDFIETILPHIEEGDIIIDGGNSHFPDTNRRTKYLAQKGIRFVGSGVSGGEEGARYGPSLMPGGNEEAWPYIKDVFQSIAAKSDGEACCEWVGDEGAGHYVKMVHNGIEYGDMQLICEAYDIMKRGLGMQDKEIGDVFAEWNKGVLDSFLIEITRDIMYFNDD-DGTPLLEKIMDSAGQKGTGKWTAINALDLGMPVTLIAESVLSRCLSSLKEERTRASKVLSYVGRSNKFEGDK-KQFLEDLEQALYASKIISYAQGFMLMQEAAKEFKWKLNKPSIALMWRGGCIIRSVFLKDITAAYRADDNLENLLFSDFFNKAI…	9e-108	331	849	455	39.78	181	268	275	4	6	60.44	44562	1	AG1IF1IL3GASV2SQ1LISI2IALA1KH2RNLVAIVAYF1KRDTFTESLKTV1VR1ILKEKNI-SEGALKSGQKKSVIIEVGTAKHNSLI1QEMFVCEAAKVLCK3KR1LMMLML1TMDA1DK3QDLF1DEKTLIKL1LHLISEPEEG2LILI7CP2QNIR1STLKQY1SAEQ3YR1IV1IS5VEKE3SY1AP3VP4KE1YWNPRYVIEKNDIVLFLQ2SA2YSQDNGSEPA2AELWLV1PDDE1SA2FY3IV6AGND4ACDEIA1GD1LMRKDRSG1NGKMNQPDLK2SGHDLV1SAKE1DNTK1KV1SD1YF2KE2ARED1LMSYSFSN1TDI-TD1MT1ILILDEVK1CM1KS1SG5IKRWSTIA1ENGAHLKD1SGSMSPMV1ILTIEATEASI…	N/A	N/A	N/A	N/A	N/A	N/A	N/A	N/A	95	95
CLIBASIA_01585	0	CLIBASIA_01585	D4I307#PHI:3126__PHI:9305#ArgD#552#Erwinia_amylovora#loss_of_pathogenicity__reduced_virulence__unaffected_pathogenicity	D4I307#PHI:3126__PHI:9305#ArgD#552#Erwinia_amylovora#loss_of_pathogenicity__reduced_virulence__unaffected_pathogenicity	0	0	D4I307#PHI:3126__PHI:9305#ArgD#552#Erwinia_amylovora#loss_of_pathogenicity__reduced_virulence__unaffected_pathogenicity	D4I307#PHI:3126__PHI:9305#ArgD#552#Erwinia_amylovora#loss_of_pathogenicity__reduced_virulence__unaffected_pathogenicity	4	382	14	395	NDFLFNTYDQSDIRFEKGKGAWLFSENGIPFLDFASGIAVNSLGHSHPELVAILKSQSEKLWHVSNLYQSTQQEIFANHLIHSTFADRVFFTNSGAESVECAIKTARRYHYMAGKTNKFRIVTFEGAFHGRTLATISAGGKLQYLEGFGPKIEGFDQAKFCDLQSLKNQISNDTAAILIEPIQGEGGVRKVPEEFLQQLRKICDDIDALLIFDEVQTGYGRTGKLFAYEWANVKPDIMTIAKGMGGGFPIGACLATNEVAACMNQGSHGSTYGGNVLAMVLGEKVLNIIQSDGFLENVINIAKILFEGLTAIKNRFPNMFLEVRGQGLLIG--LKTVFSPALLAAKFRD-------ECLLTAPSSDNVVRILPPLTITAEEIHEGLER	DEVILPVYAPAQFVPVKGKGSRIWDQQGKEYIDFSGGIAVTALGHCHPALVEALKTQGETLWHTSNVFTNEPALRLARKLIDATFAERVFFANSGAEANEAAFKLARYYASQRHSPYKSKIIAFHNAFHGRTLFTVSVGGQPKYSDGFGPKPADIVHVPFNDLAAVKAVIDDHTCAIVVEPIQGEGGVVPATEEFMQGLRQLCDEHHALLVMDEVQSGMGRSGKLFAYEHYGVQPDIVTSAKALGGGFPVSAMLTTNAIASVMAPGVHGTTYGGNPLACAVAEAALDIINTPEVLDGVAARRQLFVDALQSLNTRR-DLFSDIRGKGLLIGAALKPQY-----ADKARDILNAAAAEGVMVLVAGSGVMRFAPSLLIEPVDIAEGMER	4e-107	323	828	388	44.33	172	201	237	4	15	61.08	44562	1	NDDEFVLIFLNPTV1DAQPSADQIFRVFPEV4ASWRLIFWSDEQNQ1IKPEFYLI2ASSG4NTSA3SC2EA2AEIA2ST1SG1KT3VT2LVYFQTSNTEQPQAELIRFL1NRHK2HDSA3DE4TA5SAVN1CA1IF1TL2RY1HAYSMQARGHKSTPNY1FSRK1VITA1EHGN7AF1IV1AV2KQLPQK1LSED5IPEAGDFIDVQHAVKP1CN2QASALV1NAQV1SDNDDH1AC2LVIV9RVKPVAPT3LM1QG2KQIL2DEIHDH3IVFM4TS1YM2TS7WHAYNG1KQ3MV1IS2GAML5IVGS1CM1AT2EAVI1ASCV1NAQP1SV2ST5VP2MCVALVGA1KAVA1ND2QNSTDPGEFV1EDNG1IANAIRARKQILLFFVEDGA1TQASI…	N/A	N/A	N/A	N/A	N/A	N/A	N/A	N/A	97	97
CLIBASIA_04295	0	CLIBASIA_04295	Q2YS30#PHI:11161#SerB_(BAB1_1410)#29459#Brucella_melitensis#reduced_virulence	Q2YS30#PHI:11161#SerB_(BAB1_1410)#29459#Brucella_melitensis#reduced_virulence	0	0	Q2YS30#PHI:11161#SerB_(BAB1_1410)#29459#Brucella_melitensis#reduced_virulence	Q2YS30#PHI:11161#SerB_(BAB1_1410)#29459#Brucella_melitensis#reduced_virulence	1	295	5	299	MALIATLITHRSHPILNISLVKQIMQIVNSSIFYWLADSIACDIILPLEGMIDHHRSKILSIIADKPIDLIIHRHENRRKNLLIADMDSTMIEQECIDELADLIGIKEKVSLITARAMNGEIPFQDSLRERISLFKGTSTKIIDSLLEKKITYNPGGYELVHTMKQNGASTLLVTGGFSIFARFIAQHLGFDQYYANRFIEKDDRLTGQVMEPIIDGTAKSQILLEAIQKLQINPEDTIAVGDGNNDLDMLRVAGYGVAFHAKPALAKQAKIRIDHSDLEALLYIQGYKKDEIVK	VSLVATLIANPAKAALAPSLGIKASAAVNATGLYWLADDIACDIPLPLGMEASEADASLRATLDGAPIDVVVQEQERRRKKILIADMDSTMIGQECIDELAEEAGLRDHVAAITARAMNGEIAFEPALRERVALLKGLPLSVIDKVISTRITLTPGGPQLVRTMRKHGAYTALVSGGFTPFTRRIAEMIGFNEERANRLIDDGTRLTGTVAEPILGREAKVEKLVEIAERLGLTPEDAIAVGDGANDLGMIQLAGTGVALHAKPAVAAQAKMRIDHGDLTALLYIQGYRKADFVQ	2e-106	314	805	295	51.86	153	142	207	0	0	70.17	44562	1	MVAS1IV4TAHNRPSAHKPAIA1NAIP2VGKIQKIAMSQAIA2SASTIGFL5SD5IP3EGGMMEIADSHEHARDSAKSILLRSAITILADDGKA3LVIVIVHQREHQ1NR3NKLI10EG8DELEIA1ILKREDKH1SALA10PA1QEDPSA4IVSA1FL2TLSPTLKSIV2SKLVLIESKTKR2YLNT3YPEQ2HR2KRQKNH2SY1LA2TS3STIP1AT1FR2QEHMLI2DNQEYEYR3FL1EDKDDGDT4QT1MA3ILDGGRTE2SVQEIK1LV1AIIAQEKR1QGILNT3TA6NA3DG1LIRQVL2YT3FL5LV1KA3IM4SG2ET8KR1DAEDIF1KQ	N/A	N/A	N/A	N/A	N/A	N/A	N/A	N/A	99	99
CLIBASIA_00630	0	CLIBASIA_00630	Q8Y448#PHI:5257#SecY#1639#Listeria_monocytogenes#increased_virulence_(hypervirulence)	Q8Y448#PHI:5257#SecY#1639#Listeria_monocytogenes#increased_virulence_(hypervirulence)	0	0	Q8Y448#PHI:5257#SecY#1639#Listeria_monocytogenes#increased_virulence_(hypervirulence)	Q8Y448#PHI:5257#SecY#1639#Listeria_monocytogenes#increased_virulence_(hypervirulence)	16	435	7	431	SFSRAKDLKSRIVFTIIALIVYRFGTYIPLPSIDFISYSKAFQSK-SAGIFGLFNMFSGGAVERMAVFSLGIMPYISASIIVQLIAA-TVPSLENLKKEGEQGRKVINQYTRYATVLLGILQAYGIAVGLK--NGQGIVSDSDYFFVFSTIITLLGGTMFLVWLGEQITMRGIGNGVSLIIFSGIVAGLPSSLVSVLELGRVGSISTPLMLLIFS------STVAVIALVIFFERAQRRLLIQYPKRQVGNRMFQDDVSYLPLKLNTAGVVPSIFASSLLLLPATIMGFIDVSSSPTWIVGLVDSLGHGRSFYMVLYSVFIVFFAFFYTAIVFNPKEAADNLKKHGGFIPGIRPGDRTALHIDYVLTRVTVVGAGYLVCVCIFPEALIAVTGVPVSLS-…	NFFKVADIRKKILFTLAMLVIFRIGTFVPVPGVN----AAALQSSMDGGILGFLNTFNGGALKNFSIFAMGVMPYITSSIIVQLLQMDVVPKLTEWSKQGEMGRKKLNQLTRYMTIGLGLVEAFGMAYGFNRMSSAGLVIEPSIGRYAIIAIVLTTGTMFLMWLGEQITVKGVGNGVSIIIFAGIVARIPDG-VRQLYVSQIENAGDQLFLHVLTLVGVGVAILAIVVAVIFFQQALRKIPIQYSKRVAGAKQSGAQATHLPLKLNSAGVIPVIFASAFIITPQTILTFFDQSNDVVKV--LKDVFDYTKPIGMILYVALIVAFTYFYAFIQVNPEKVADNLKKQGGYIPSKRPGRETQAYLTSVLYRLTFVGAIFLSAVAILPTIGTTVFSLPQSLAV…	2e-105	322	824	432	41.67	180	233	269	8	19	62.27	44562	1	SN1SFRKAVKA1LIKRSKRK1VL2ILIAAM1IVVIYF1FI2YFIV1LV1SGIVDNF-I-S-Y-SAKA1FL2KS-MSDAG2FL1LFFL1MT1SN3VLEKRNMFASVI1SALM1IV4STAS6ILAQAM-DTV2SK1ETNELWKS1EQ2QM3VKIL2YL3AM1VILG2ILLVQE1YF1IM1VY1LFKN-R-MNSGSQA1IL1SIDESPDSYIFGFRVYFASITIIA1TV1LTGT5VM7MVRK1IV5LI3SA4GRLI1SDSGL-1SRVQ1EYLVGSRQVIGESNIASGTDPQ1MF1LHIVFLST-L-V-G-V-G-VSATIVL1VIIVAVLA4EQRQ1QL1RKLILP3PS2QVVA1NARKMQFSQGDADQVASTYH6TS3VI1SV4SALFLILILT1AQ2MLGT…	N/A	N/A	N/A	N/A	N/A	N/A	N/A	N/A	95	95
CLIBASIA_05100	0	CLIBASIA_05100	V6RRH2#PHI:1594#GzOB034#5518#Fusarium_graminearum#unaffected_pathogenicity	V6RRH2#PHI:1594#GzOB034#5518#Fusarium_graminearum#unaffected_pathogenicity	0	0	V6RRH2#PHI:1594#GzOB034#5518#Fusarium_graminearum#unaffected_pathogenicity	V6RRH2#PHI:1594#GzOB034#5518#Fusarium_graminearum#unaffected_pathogenicity	5	490	70	579	LTPESLSSNSIEVRSQKLNMLRKSLA-EVYPAHFHRDITNAEVREKYSHLQNDEKSQD-MITVAGRVYSSRNSG---MFMDIHDASGKIQIFTHKDTADQDSQNLLSM---IDIGDIIGITGQVRRT---------KRGELTVNAQKIIMLSKALNSIPETYYGLSDVEIRYRKRYLDIISNSDSKIRFQQRSLLISQIRHFMEKKGFMEVETPILQPIYGGATADPFKTHHNILKADMYLRIAPELYLKRVLISGLTDQVFELNRNFRNEGVSSRHNPEFTMIEAYWAYTDYRDMMKLVEDLCHNLAKTLHGTTDIPF----GEKV-ISFKAPFACKSMLQLVKEATGLDF------MLLKSDQEARVAAQSIGITVENDALWGEVMMTIFEEKIEKN…	LTP----NQYFEIRSRNINKLRETKSPNPYPHKFNVTYDLRKFVEEFGHLKSGEHAKDKIIQIGARVHGKRASGAKLLFYDVRTEGVKVQIMCQAQEVREGAPSFEDQHEHLRRGDIIGIIGYPGRTAPKTKIEKGEEGELSIFATEVVLLTPCLHALPDDHYGFKDLEQRYRKRYLDLICNEKARNVFITRSKMITWIRKYFDERDFVEVETPMMNQIAGGATAKPFTTHHNEYDMPMFMRVAPELYLKMLVVGGL-NRVYEIGRQFRNEGADLTHNPEFTTIEFYEAYADVNDLMKTTEEMISGLVKYLTGGYKTTFHTQSGEKYEVNWEAPWPRYEMIPTLEEATGEKFPSGDQLHTQETNEFLKNVLKKMNLECTPPLTNARMIDKLVGEFIEEK…	2e-105	329	844	518	36.87	191	287	298	13	40	57.53	44562	1	3E-S-L-S-SNNQSYIF1VI2QRKNLI1MK2KESTLKAS-PENVP2AHHK1HNRVDTIYTDNLAREKVFRV1KEYFSG2QKNSDG1KHSAQK1-KMI1TQVIAGGA2YHSGSK1NA2-A-K-LML1MY1IVHRDTAESGGV1IV2FMTCHQKADQTEAVDRQEDGSAQPNSLFLESDMQ-H-E-HILDRIR6TI1QYVPRG2-A-P-K-T-K-I-E-K-GKERE3TSVINF1QTKEIVIVML1STKPAC1NHSAIL1EDTDYH2LFSK1VL1IQ8IL1SC1SEDKSAKRINRV1QIQT2LKLM1STQW2HKFYMFEDKEKRGD1MV5IMLMQNPQ1YA5DK2KT4IELYKDAMDP1YFLM1IV7RMVLLVIVSG2T-DNQR1FY1LING1NQ5VASDSL…	N/A	N/A	N/A	N/A	N/A	N/A	N/A	N/A	97	97
CLIBASIA_03855	0	CLIBASIA_03855	Q1JLQ2#PHI:4652#MntE#1314#Streptococcus_pyogenes#unaffected_pathogenicity	Q1JLQ2#PHI:4652#MntE#1314#Streptococcus_pyogenes#unaffected_pathogenicity	0	0	Q1JLQ2#PHI:4652#MntE#1314#Streptococcus_pyogenes#unaffected_pathogenicity	Q1JLQ2#PHI:4652#MntE#1314#Streptococcus_pyogenes#unaffected_pathogenicity	6	354	4	356	HKQICDLKNRFAEIELRMSESPSVD---AYIKLTEEYAAISPIISKISIYDQKKQEEQDLHTVIGDHNSDSEIRDLAQIEVLAIEKEIRELENEINYLLLPKDTDDDKSCILEIRAGTGGSEAALFVGDLFRMYERYAALRKWKVEVLSSSDNDDGGYKEIVATISGRGVFSRMKFESGVHRVQRVPATEASGRVHTSAATVAVLPEAAEIDVDIPLEDIRIDTMRASGSGGQHVNTTDSAVRITHIPTGIMV-TSSEKSQHQNRLRAMKVLRARLYDVERKRMANERSANRKLQIGSGDRSERIRTYNFSQGRITDHRINLTLYKLEYVLQGYIDDIINPLLTAHQAKMIGS	YDQLQAVEDRYEELGELLSDPDVVSDTKRFMELSREEANTRETVTAYREYKQVIQTISDAEEMIKDASGDPELEEMAKEELKESKAAKEEYEEKLKILLLPKDPNDDKNIILEIRGAAGGDEAALFAGDLLTMYQKYAETQGWRFEVMESSVNGVGGIKEVVAMVSGQSVYSKLKYESGAHRVQRVPVTESQGRVHTSTATVLVMPEVEEVEYDIDQKDLRVDIYHASGAGGQNVNKVATAVRMVHIPTGIKVEMQEERTQQKNRDKAMKIIRARVADHFAQIAQDEQDAERKSTVGTGDRSERIRTYNFPQNRVTDHRIGLTLQKLDTILSGKMDEVIDALVMYDQTKKLES	5e-104	313	801	353	45.61	161	188	232	2	4	65.72	44562	1	HYKD1ILCQDALVKEND1FYAE1ILEGLERLML1EDSPPDSV1DS-D-T-KARYFIMKE1TSER1YE1ANITSRPEITIVSTKAIYSRIE1DK1KVKI1ETEIQS1LAHETEVM1GK1HANSSG1SP1ILREDELM1QKIE1VLLKAEISEKKAEAIKRE1LY1NEEKILNKYI6TPDN3SNCI5AGGATA2SD5VA3FLRT2EQRK2AELTRQKG1KRVF2LMSE2DV1DGDV2YI2IV2TMIV2RQGS1FY1RKML1FY3VA7AV2ASSQ6AT3AL1LM2AVAE1IVDEVY2PDLQEK1IL1IV1TIMYRH3SA3HN2TKTVDAST3IMTV6MK1-ETMSQSE1KRST1HQQK2LDRK3VILI3LVYA1VHEFRAKQRIMAAQND1RQSD1NE2LSQ…	N/A	N/A	N/A	N/A	N/A	N/A	N/A	N/A	98	98
CLIBASIA_02810	0	CLIBASIA_02810	P9WHH9#PHI:7582#Rv0462_(lpdC)#1773#Mycobacterium_tuberculosis#increased_virulence_(hypervirulence)	P9WHH9#PHI:7582#Rv0462_(lpdC)#1773#Mycobacterium_tuberculosis#increased_virulence_(hypervirulence)	0	0	P9WHH9#PHI:7582#Rv0462_(lpdC)#1773#Mycobacterium_tuberculosis#increased_virulence_(hypervirulence)	P9WHH9#PHI:7582#Rv0462_(lpdC)#1773#Mycobacterium_tuberculosis#increased_virulence_(hypervirulence)	5	480	4	463	YDIILIGSGPAGYVAAIRAAQLGFKVAIVEYAGLGGICLNWGCIPTKSLLRSAEILDHIQNAQHYGLNVAGKVEFNIEDIVKRSRDISHRLNRGVEFLMHKNKVDIIWGKATLKNPSEITVSKPSQPAVQPQHPIPKKVLGEGTYKAKHIIIATGARPRHIEGIEPDSHLIWTYFDALKPSKTPKSLIVMGSGAIGVEFSSFYKSLDVDVSLIEVKDRILPVEDSEISQFVQRSLQKRGIKILTESKISSVKQKGDMVSVQVERKDGSVSSMQAEKLLLSAGVQGNIENIGLEKIGVK-TSNGCIIVDGYGRTNVPGIYAIGDVAGAPMLAHKAEHEGIICIEKIAGKSKVYPLDKSKIPGCTYCNPQVASIGLTEEKARSQGLDIRVGKHSFSANGKA…	YDVVVLGAGPGGYVAAIRAAQLGLSTAIVEPKYWGGVCLNVGCIPSKALLRNAELV-HIFTKDAKAFGISGEVTFDYGIAYDRSRKVAEGRVAGVHFLMKKNKITEIHGYGTFADANTLLVDLNDG--------------GTESVTFDNAIIATGSSTRLVPGTSLSANVV-TYEEQILSRELPKSIIIAGAGAIGMEFGYVLKNYGVDVTIVEFLPRALPNEDADVSKEIEKQFKKLGVTILTATKVESIADGGSQVTVTV-TKDGVAQELKAEKVLQAIGFAPNVEGYGLDKAGVALTDRKAIGVDDYMRTNVGHIYAIGDVNGLLQLAHVAEAQGVVAAETIAGAETLTLGDHRMLPRATFCQPNVASFGLTEQQARNEGYDVVVAKFPFTANAKA…	8e-104	320	820	477	40.25	192	267	279	5	18	58.49	44562	1	2IVIVLVIL1SA2AG12FLKSVT4YPAKGYLW2IV3WV4TS1SA3SN2ILLVD-2QFNTAKQDHAYKGALFNGVIAS1KE1ET1NDIYEGDIIAVYKD3DKIVSAHERGLRNVRA2EH3HK3VIDTIE1WH1KYAG1LFKANDPASNETILTL1SDKLPNSDQGP-A-V-Q-P-Q-H-P-I-P-K-K-V-L-1ETGETSYVKTAFKDHNIA5ASRSPT1HLIVEP1ITESPLDSSAHNLVIVW-2FEDEAQLIKLPSSRKETL3LI1VIMA1SA4VM2SGSYFVYL1SNLYDG3STLIIV1VFKLDP1IA2VN2SAEDIV1QKFEVIQERKSQLFQK1RL1IVKT3EAST1IVSE1VIKAQDKG1DSMQ1ST1QT1E-RT3SVVASQSEMLQK3LV1LQ…	N/A	N/A	N/A	N/A	N/A	N/A	N/A	N/A	99	99
CLIBASIA_02955	0	CLIBASIA_02955	Q2FYQ0#PHI:9450__PHI:9760__PHI:11314#PstB#1280#Staphylococcus_aureus#unaffected_pathogenicity__reduced_virulence	Q2FYQ0#PHI:9450__PHI:9760__PHI:11314#PstB#1280#Staphylococcus_aureus#unaffected_pathogenicity__reduced_virulence	0	0	Q2FYQ0#PHI:9450__PHI:9760__PHI:11314#PstB#1280#Staphylococcus_aureus#unaffected_pathogenicity__reduced_virulence	Q2FYQ0#PHI:9450__PHI:9760__PHI:11314#PstB#1280#Staphylococcus_aureus#unaffected_pathogenicity__reduced_virulence	9	254	39	283	SNKVSVCYGEKRALFDINLKIPQNSVTALIGPSGCGKSTFLRCLNRMNETIDNCVFTGEIILDGKNIYQSSVDVVRLRARVGMVFQRPNPFPKSIYDNVAYGPRIHGLGNNKADIDQIVEMSLKKASLFNEVKDRLFHDASLLSGGQQQRVCIARALAVNPEVILMDEPCSALDPIATASVEELIHELRESLTIVIVTHSMQQAARVSQRAAMFHMGHLVEEDDTDKMFTAPSDQRTQDYIMGRFG	TQNLDLWYGENHALQNINLDIYENQITAIIGPSGCGKSTYIKTLNRMVELVPSVKTAGKILYRDQDIFDQKYSKEQLRTNVGMVFQQPNPFPKSIYDNITYGPKIHGIKNKKV-LDEIVEKSLRGAAIWDELKDRLHTNAYSLSGGQQQRVCIARCLAIEPEVILMDEPTSALDPISTLRVEELVQELKEKYTIIMVTHNMQQAARVSDKTAFFLNGYVNEYDDTDKIFSNPSNKKTEDYISGRFG	2e-103	304	779	246	57.32	141	104	188	1	1	76.42	44562	1	STNQKNVLSDVLCW3KNRH2FQDN3KD1PYQE1SQVI2LI10FYLIRKCT4NV1TLIVDPNSCVVKFTTA1EK1ILLYDRGDKQND1YFQDSQSKVYDSVKVERQ2ATRN6RQ11VIAT3RK3LIGK1NK1AVD-IL1QE3MK2KRKG1SALIFWND1VL4FHHTDN1SYLS13AC2VINE9CT6AS1ALSR4IVHQ2RK1SKLY2VIIM3SN8QDRKAT1MF1HLMN1HYLVVN1EY5MI1TSAN2DNQKRK1QE3MS4	N/A	N/A	N/A	N/A	N/A	N/A	N/A	N/A	97	97
CLIBASIA_04205	0	CLIBASIA_04205	B2I2B5#PHI:8042#LpxA#470#Acinetobacter_baumannii#reduced_virulence	B2I2B5#PHI:8042#LpxA#470#Acinetobacter_baumannii#reduced_virulence	0	0	B2I2B5#PHI:8042#LpxA#470#Acinetobacter_baumannii#reduced_virulence	B2I2B5#PHI:8042#LpxA#470#Acinetobacter_baumannii#reduced_virulence	8	442	6	454	IVLAAGRGHRMKSSSSKVLQKIAGKPMISHVMETIAAAGIENVALVLGYGAEEITRINFPPTLSVEYYIQDCQQGTAHAV-LTAQDAIKPGYDDVIIMYGDVPLVSSHTLKKAMDKIAQGYSIAVVGFNADNPKGYGRLLIKNNEIIAIREENDATDEERKIHYCNSGLMAIDGLYIMDWLLQIKKNKVSQEYYLTDIIEKARLDGKSIASIDVKEQ-EVCGCNNRYELSLIENIWQSRYRRQMMISGVTMIAPE------TVFLSHDTIIQPDTVIE------PHVFFGCGVSIENYV-----QIRAFSYLEGVHIGKKTIIGPFARIRQETTIEKNVRIGNFCEVKKATIKEGSKINHLSYVGDSVVGKNVNIGAGTITCNYDGTHKYKTHINENAF…	IILAAGKGTRMRSQLPKVLQPLAGRPLLGHVIKTAKQLLAENIITIYGHGGDHVKK-TFAQE-NIQWVEQAEQLGTGHAVQMTLPVLPKDGIS--LILYGDVPLVRQTTLEQLIE-VSNKTGIGMITLHVDNPTGYGRIVRQDGKIQAIVEHKDATEAQRQIQEINTGIYCVSNAKLHEWLPKLSNENAQGEYYLTDIVAMAVADGLEIASIQPELAFEVEGVNDRLQLAALEREFQKQQAKELMQQGVTFADPARFDLRGTVKVGHDVRIDVNVIIEGDCELGDFVEIGAGCILKNTTIAAGTKVQAYSVFDGAVVGENTQIGPFARLRPGAKLANEVHIGNFVEVKNTTIGLGSKANHFTYLGDAEIGAESNIGAGTITCNYDGANKHKTTIGDAVF…	3e-102	314	805	454	39.87	181	249	268	9	24	59.03	44562	1	1VI4RK1HT2KR1SQSLSP4KPIL2KR1MLILSG2MIEK1IAAKAQALGLIA2VIAILTVILY1YH1AGEDEHIVTKRKI-NT1PAPQTEL-SNVIEQYWYVIE1DACE1QL2AG3-QLM1ALQPDVALIP1PD1YIDSD-V-IL1ML7SRSQHT2KEKQALMIDEK-IVASQNGKYTSG1AGVMVIGTFLNHAV3KT4LILVIRKQNDNGEK1IQ2RV1EHNK3DEEAEQ1KQ1HQYECI1ST1LIMYACIVDSGNLAYKILMHDE2LPQKILKSKNNEKNVASQQG7IVEAKM1RVLA2KLSE4DQVPKEELQA-F2CE1CV1ND1YLEQ1SALAIL1NRIEWF1SKRQYQRARKQEML1IQSQ3MFIAAD1EA-R-F-D-L-R-G2FKLVSG2TVI…	N/A	N/A	N/A	N/A	N/A	N/A	N/A	N/A	98	98
CLIBASIA_04770	0	CLIBASIA_04770	Q2FH26#PHI:7353#OdhB#1280#Staphylococcus_aureus#unaffected_pathogenicity	Q2FH26#PHI:7353#OdhB#1280#Staphylococcus_aureus#unaffected_pathogenicity	0	0	Q2FH26#PHI:7353#OdhB#1280#Staphylococcus_aureus#unaffected_pathogenicity	Q2FH26#PHI:7353#OdhB#1280#Staphylococcus_aureus#unaffected_pathogenicity	22	435	3	421	KILVPSLGESVNEATVGTWLKEIGESVEIGEILVELETDKVTVEVPSPVSGKLHEMSVAKGDTVTYGGFLGYIVEIARD-EDESIKQNSP--NSTANGLPEIT---------------DQGFQMPHSPSASKLIAESGLSPSDIKGTGKRGQILKS---DVMAAISRSESSVDQSTVDSHKKGVFSRIINSASNIFEKSSVSEELSEERVKMSRLRQTVAKRLKDAQNTAAILSTYNEVNMSRIISIRSRYKDIFEKKH-GIKLGFMGFFTKAASHVLQEIKGVNAEIDGDHIVYKNYCHIGVAVGTDKGLVVPVIRHADKMNIVEIEREIARLGREARAGHLSMRDLQNGTFTISNGGVYGSLLSSPILNPPQSGILGMHKIQERPI-VEDGQIVIRP…	EVKVPELAESITEGTIAEWLKNVGDSVEKGEAILELETDKVNVEVVSEEAGVLSEQLASEGDTVEVGQAIAIIGEGSGNASKENSNDNTPQQNEETNNKKEETTNNSVDKAEVNQANDDNQQRINATPSARRYARENGVNLAEV--SPKTNDVVRKEDIDKKQQAPASTQTTQQASAKEEKK----------YNQYPTKPVI------REKMSRRKKTAAKKLLEVSNNTAMLTTFNEVDMTNVMELRKRKKEQFMKDHDGTKLGFMSFFTKASVAALKKYPEVNAEIDGDDMITKQYYDIGVAVSTDDGLLVPFVRDCDKKNFAEIEAEIANLAVKAREKKLGLDDMVNGSFTITNGGIFGSMMSTPIINGNQAAILGMHSIITRPIAIDQDTIENRP…	1e-101	311	797	437	41.65	182	214	257	9	41	58.81	44562	1	KEIVLK2SE1GA2VINT1AG1VIGATE3ENIV1ED3IK2IALIVL7TN3PV1PEVESA1KV1HS1MQSLVAASKE4TEYV1GQFALIGAYI1VG1IGASRGDN-AESDK1SNISKNQD1ST1-Q-Q1SETEAT1GNLKPK1IE1-T-N-N-S-V-D-K-A-E-V-N-Q-A-N-D1QNGQFQQRMIPNHAST3SRKRLYIAAR1SN1LVSNPLSADEIVK-G-TSGP1RTGNQDIVLVKRSK-E-D-I1VKMKAQAQIASPRA1ETSQSTVTDQ1SATSVADKSEHE2G-V-F-S-R-I-I-N-S-A-SY1IQFYEPKTSKSP1SIE-E-L-S-E-E-1VE4LRRKQK1VA2RK1KLDEAVQS1TNAT1IM1ST1YF3ND1STRNIVIMSEIL1SK1YK1…	N/A	N/A	N/A	N/A	N/A	N/A	N/A	N/A	95	95
CLIBASIA_04730	0	CLIBASIA_04730	O42772#PHI:822#Ip#1047171#Zymoseptoria_tritici#chemistry_target:_resistance_to_chemical	O42772#PHI:822#Ip#1047171#Zymoseptoria_tritici#chemistry_target:_resistance_to_chemical	0	0	O42772#PHI:822#Ip#1047171#Zymoseptoria_tritici#chemistry_target:_resistance_to_chemical	O42772#PHI:822#Ip#1047171#Zymoseptoria_tritici#chemistry_target:_resistance_to_chemical	23	251	59	290	GEKNLKEYRIYRWNPDNKGN-PCMDTYYVDLDNCGPMVLDGLLYIKNKIDPTLTLRRSCREGICGSCGMNIDGTNTLACV-KDMKDIKGAIAVYPLPHMSVIKDLVVDMSHFYSQHRSIEPWL-KTVSPKPAKELLQSHEDRQKIDGLYECVMCACCSTSCPSYWWNSDRYLGPAILLQAYRWLIDSRDEFQGERLDNLEDPFRLYRCHTIMNCTQSCPKGLNPAKAIAKIK	ADAKTKTFHIYRWNPDQPTDKPRMQSYTLDLNKTGPMMLDALIRIKNEVDPTLTFRRSCREGICGSCAMNIDGVNTLACLCRIPTDTAKETRIYPLPHTYVVKDLVPDMTQFYKQYKSIKPYLQRDTAPPDGKENRQSVADRKKLDGLYECILCACCSTSCPSYWWNSEEYLGPAVLLQSYRWINDSRDEKTAQRKDALNNSMSLYRCHTILNCSRTCPKGLNPALAIAEIK	2e-101	300	768	232	59.91	139	90	175	3	3	75.43	44562	1	GAEDKANKLT1ETYFRH7NQKPGTND-K1CR1DQTS1YTVL2DNNKCT3VM2GA1LIYR3KEIV5LF12GA5TV5VL-CKRDIMPKT1ITKAGKAEITARVI5MTSY1IV4VP2STHQ2SK1HYRK2EK1WY1-QKRTDVTSA1KPPDAG2LNLR2HVEA2QK1IL6VIML15DERE5IV3AS3LIIN5FKQTGAEQ1LK1NA1ENDNPSFMRS7ML2TSQRST8KL3KE2	N/A	N/A	N/A	N/A	N/A	N/A	N/A	N/A	88	88
CLIBASIA_04105	0	CLIBASIA_04105	A0QPF9#PHI:11319#RmlA#1772#Mycolicibacterium_smegmatis#reduced_virulence__unaffected_pathogenicity	A0QPF9#PHI:11319#RmlA#1772#Mycolicibacterium_smegmatis#reduced_virulence__unaffected_pathogenicity	0	0	A0QPF9#PHI:11319#RmlA#1772#Mycolicibacterium_smegmatis#reduced_virulence__unaffected_pathogenicity	A0QPF9#PHI:11319#RmlA#1772#Mycolicibacterium_smegmatis#reduced_virulence__unaffected_pathogenicity	1	289	1	288	MKGIVLAGGSGTRLRPLTDLLSKQMLPIYNKPMIYYPVSTLMDAGIREILIISTPRDLPVLKEFLGSGEKWGVQFSYIEQLVPAGLAQSYILGAEFIGDSSSVLILGDNVFYGSDISDIFHKARARRNSATVVGCHVQNPQRYGVVEVDSSNQAISIEEKPNNPKSSFAVTGIYFYDQEVVNIARNIRPSARGELEITDVNSYYLDKGLLAVEFLREGSAWFDAGTPESLLDTAVFVRNIENRLGLYVACPEEIAYRHDFINESQFFQLIDHFGNSPYGLYLRQVVEKK	MRGIILAGGSGTRLHPLTIGVSKQLLPVYDKPLVYYPLSTLIMAGIRDILVITTPADAPAFRRLLGDGSDFGVNLSYAAQNEPEGLAQAFLIGADHIGNDTVALALGDNIFYGPGLGTSLRRFEHVSGGA-IFAYWVANPSAYGVVEFDADGKAVSLEEKPKTPKSHYAVPGLYFYDNTVIDIARSLKKSARGEYEITEVNQIYLNRGQLSVEVLARGTAWLDTGTFDSLLDASDFVRTIELRQGLKVGAPEEIAWRAGFIDDDQLATRAKELLKSGYGHYLLQLLDRE	8e-101	299	766	289	50.52	146	142	198	1	1	68.51	44562	1	1KR2VI9RH3DILGLV3ML2IV1ND2MLIV3VL3MIDM4ED2IV1ST2RA1LA1VALFKRERFL2SD1ESKDWF2QNFL2IAEA1LNVE1AE4SAYFILLI2EDFH2DNSDSTSVVA1IA4VI3SPDGILSGDTISFLHRKRAFREAHRVRSNGSG1T-VIVFGACYHW1QA2QSRA5VF1SASDNGQK1IV1IL4NKNT3SHFY2TP1IL4QNET1VIND3NSILRKPK5LY3DE2SQYI2DNKR1LQ1AS2FV1RAER1ST2FL1AT2PFED4TAASVD3NT2NL1LQ2YK1AGCA5YW1HADG2NDEDSD1FLFAQTLRIADKHEFLGLNK1PG2LH2RL1VLVLEDKRKE	N/A	N/A	N/A	N/A	N/A	N/A	N/A	N/A	99	99
CLIBASIA_03190	0	CLIBASIA_03190	E8XEV4#PHI:3723#RNase_E#28901#Salmonella_enterica#reduced_virulence	E8XEV4#PHI:3723#RNase_E#28901#Salmonella_enterica#reduced_virulence	0	0	E8XEV4#PHI:3723#RNase_E#28901#Salmonella_enterica#reduced_virulence	E8XEV4#PHI:3723#RNase_E#28901#Salmonella_enterica#reduced_virulence	170	545	90	465	IQEVIKNRQILLVQIVKEERGNKGAAVTTYLSLAGRYSVLMPNTSKGETISRKITNPVDRKNLKEIARGLEVPAGMGVILRTAGASRTKIEIKRDFEYLMRLWDNVRELALNSVAPHLVYEEGNLIKRAIRDLYCKDISEIIVSGEKGYREAKDFMKLL-MPSYARIVRQYEDPHPIFFRSGIEVQLDSLHQTEVTLPSRGYVIINQTEALVSIDVNSGRSTREHCIEDTALQTNLEAAEEIARQLRLRDLAGLIVVDFIDMEEKKNNRSVEKKLKESLKKDRARVQVGAISNFGLLEMSRQRIRSSVLESTTKVCTYCKGAGYIRSQSSVALSILRSVEEYLLQYTAHNIIVHTHSDVVLYLLNQKRATIVEYEAR	IKDVLREGQEVIVQIDKEERGNKGAALTTFISLAGSYLVLMPNNPRAGGISRRIEG-DDRTELKEALASLELPEGMGLIVRTAGVGKSAEALQWDLSFRLKHWEAIQKAAESRPAPFLIHQESNVIVRAFRDYLRQDIGEILIDNPKVMEMARQHIAALGRPDFSSKIKLYTGEIPLFSHYQIESQIESAFQREVRLPSGGSIVIDSTEALTAIDINSARATRGGDIEETAFNTNLEAADEIARQLRLRDLGGLIVIDFIDMTPVRHQRAVENRLREAVRQDRARIQISHISRFGLLEMSRQRLSPSLGESSHHVCPRCSGTGTVRDNESLSLSILRLIEEEALKENTQEVHAIVPVPIASYLLNEKRTAVNAIETR	1e-100	334	857	377	45.89	173	202	247	2	2	65.52	44562	1	1QKED1ILKRNERG1IELVLI3VD10VL2YFLI4RS1SL5TNSPKRGAEGTG3KR1TENGP-VD2KTNE3IAALRAGS2VL1AE3VL1LV4AVSGRKTSKAIEEAILKQRW1FLESYFLRMLRKLH1DENAVIRQEKLA1LENSSRVP2HF1VIYHEQ1GS1LV1KV2IF2LYYLCRKQ2SG2ILVISDGNEP1GVYMREEM1KRDQFHMIKALA1-GMR1SDYFASRSIKVIRKQL1ETDGPEHI1IL1FSRHSYGQ2VS1LIDE1LAHF1TR2TR3RG1YSVIIV1NDQS4VTSA2VI2GA1SA2EGHGCD2DE2LFQN6ED11AG4VI5ETEPKVKRNHNQ1SA2KNKR1KR1SALVKRKQ4VI1VIGSAH2NR10ILRSSP1VLLG2TSTHKH2T…	N/A	N/A	N/A	N/A	N/A	N/A	N/A	N/A	63	52
CLIBASIA_01585	0	CLIBASIA_01585	B5F8I0#PHI:8863#ArgD#28901#Salmonella_enterica#reduced_virulence	B5F8I0#PHI:8863#ArgD#28901#Salmonella_enterica#reduced_virulence	0	0	B5F8I0#PHI:8863#ArgD#28901#Salmonella_enterica#reduced_virulence	B5F8I0#PHI:8863#ArgD#28901#Salmonella_enterica#reduced_virulence	4	390	14	403	NDFLFNTYDQSDIRFEKGKGAWLFSENGIPFLDFASGIAVNSLGHSHPELVAILKSQSEKLWHVSNLYQSTQQEIFANHLIHSTFADRVFFTNSGAESVECAIKTARRYHYMAGKTNKFRIVTFEGAFHGRTLATISAGGKLQYLEGFGPKIEGFDQAKFCDLQSLKNQISNDTAAILIEPIQGEGGVRKVPEEFLQQLRKICDDIDALLIFDEVQTGYGRTGKLFAYEWANVKPDIMTIAKGMGGGFPIGACLATNEVAACMNQGSHGSTYGGNVLAMVLGEKVLNIIQSDGFLENVINIAKILFEGLTAIKNRFPNMFLEVRGQGLLIGLKTVFSPALLAAKFRDEC-----------LLTAPSSDNVVRILPPLTITAEEIHEGLERIERTAIKL	DEVILPVYAPADFIPVKGKGSRVWDQQGKEYIDFAGGIAVTALGHCHPALVEALKSQGETLWHTSNVFTNEPALRLGRKLIDATFAERVLFMNSGTEANETAFKLARHYACVRHSPFKTKIIAFHNAFHGRSLFTVSVGGQPKYSDGFGPKPADIIHVPFNDLHAVKAVMDDHTCAVVVEPIQGEGGVQAATPEFLKGLRDLCDEHQALLVFDEVQCGMGRTGDLFAYMHYGVTPDILTSAKALGGGFPVSAMLTTQEIASAFHVGSHGSTYGGNPLACAVAGAAFDIINTPEVLQGIHTKRQQFVQHLQAIDEQF-DIFSDIRGMGLLIG-------AELKPKYKGRARDFLYAGAEAGVMVLNAGADVMRFAPSLVVEEADINEGMQRFAQAVGKV	3e-100	306	783	398	40.95	163	216	232	3	19	58.29	44562	1	NDDEFVLIFLNPTV1DAQPSA1IFRIFPEV4ASWRLVFWSDEQNQ1IKPEFYLI3SG4NTSA3SC2EA2AEIA4SG1KT3VT2LVYFQTSNTEQPQAELIRFLAGNRHK2HDSA3DE2FL1TM3AT1SAVN1CT1IF1TL2RH1HAYCMVARGHKSTPNF1FTRK1VITA1EHGN5TS1AF1IV1AV2KQLPQK1LSED5IPEAGDFIDIQHAVKP1CN2QHSALV1NAQVIMSDNDDH1AC1IVLVIV9RQKAVAPTEP3QKQG2KDIL2DEIHDQ3IV5TC1YM4KD4EMWHAYNG1KT3ML1IS2GAML5IVGS1CM1AT1NQ1VI1ASCAMFNHQV10VP2MCVALVGAEGKAVALFND2QNSTDPGEFV1EQNGVIIHNTIKARKQIQLFFVEQ…	N/A	N/A	N/A	N/A	N/A	N/A	N/A	N/A	99	99
CLIBASIA_00340	0	CLIBASIA_00340	P9WN39#PHI:7587#Rv2220_(glnA1)#1773#Mycobacterium_tuberculosis#increased_virulence_(hypervirulence)	P9WN39#PHI:7587#Rv2220_(glnA1)#1773#Mycobacterium_tuberculosis#increased_virulence_(hypervirulence)	0	0	P9WN39#PHI:7587#Rv2220_(glnA1)#1773#Mycobacterium_tuberculosis#increased_virulence_(hypervirulence)	P9WN39#PHI:7587#Rv2220_(glnA1)#1773#Mycobacterium_tuberculosis#increased_virulence_(hypervirulence)	1	458	1	478	MVDKATSIIQKIAQ-EKVKFIDLRFTDLQGKFRHISMNVSLFNENTLLNGITFDSSSIDGWHSKHP-NLLLIPDIETMHMDPFYAQSTVAFICNVYDPITLQPYNRDPRYTAQKAIDYLQTTDIGDTLLLGITTEFFVFDNVHCTISPIKSGFALESTEFLQNGN---------NKGYDSHAKSSY-TLPPQDKLHDMRSEIVSALNNIGVQITKYHNQIND-AQHSFGLQSESLLHASDNLQKYKYSVHQVANSYCKIATFMPKPIASHNGSGMYLNMSIHK-GEKAIFTGNQHDRVSLKGLYYLGGIIKHAKSLNALTNASTNSYKRLLTDSQSPTKLTYSTHNHSASCRIPYENKSDN-KSIEIRFPDLSANPYLAPAAILMAGLDGIAKKIHPGK…	MTEKTPDDVFKLAKDEKVEYVDVRFCDLPGIMQHFTIPASAFDKSVFDDGLAFDGSSIRGFQSIHESDMLLLPDPETARIDPFRAAKTLNINFFVHDPFTLEPYSRDPRNIARKAENYLISTGIADTAYFGAEAEFYIFDSVSFDSRANGSFYEVDAISGWWNTGAATEADGSPNRGYKVRHKGGYFPVAPNDQYVDLRDKMLTNLINSGFILEKGHHEVGSGGQAEINYQFNSLLHAADDMQLYKYIIKNTAWQNGKTVTFMPKPLFGDNGSGMHCHQSLWKDGAPLMYDETGYAGLSDTARHYIGGLLHHAPSLLAFTNPTVNSYKRLVPGYEAPINLVYSQRNRSACVRIPITGSNPKAKRLEFRSPDSSGNPYLAFSAMLMAGLDGIKNKIEPQA…	6e-100	310	793	478	37.87	181	277	269	9	20	56.28	44562	1	1VTDE1ATTPSDIDIVQF1IL1QK-D3KEFYIV1LV2TC2QP1KIFMRQ1IFSTMINPVA1LA1NDEKNSTVLFLDND1ILTA2SG3DR1WFHQ1KI1PE-SNDLM2IL2IP2MAHRMI3YR1QASK1VLANFIINCFNF1YH2IF2QE2NS4YNTI1QR2IEDN2QITS1DG1GA2LALYLF1IATETA2FYVI2NS1HSCFTDISSRPAINKG1GFFYAELVEDSATIESFGLWQW1GTNG-A-A-T-E-A-D-G-S-P1KR2DKSVHRAH1SGSG1-FTPLVPA1QN1KQLYHV1ML1SDEKIMVLSTAN1NI1IS1VFQIILTE1YG1NHQEIVNGDS-GAG1HASEFIGNLY1SFEN5SA1NDLM1KL3SIVIHKQNVT1NWSQYNCG1ITAV6…	N/A	N/A	N/A	N/A	N/A	N/A	N/A	N/A	100	100
CLIBASIA_03930	0	CLIBASIA_03930	E3P6S0#PHI:2474#Imd1#5207#Cryptococcus_neoformans#reduced_virulence	E3P6S0#PHI:2474#Imd1#5207#Cryptococcus_neoformans#reduced_virulence	0	0	E3P6S0#PHI:2474#Imd1#5207#Cryptococcus_neoformans#reduced_virulence	E3P6S0#PHI:2474#Imd1#5207#Cryptococcus_neoformans#reduced_virulence	14	462	48	512	LTFDDVLLRPEFSNVLPRDIDISTRIAKDFTLNLPIMSAAMDQVTDSRLAIAMAQAGGLGVIHRNFSPSEQVAQVHQVKKFESGMVVNPVTISPYATLADALALMKKYSISGIPVVESDV--GKLVGILTNRDVRFASNAQQAVGELMTRNLITVKKTVNLENAKALLHQHRIEKLLVVDDDGCCIGLITVKDIERSQLNPNATK--DSKGRLRVAAAVSVAKDIADRVGPLFDVNVDLVVVDTAHGHSQKVLDAVVQIKKNFPSLLVMAGNIATAEGALALIDAGADIIKVGIGPGSICTTRVVTGVGCPQLSAIMSVVEVAERAGVAIVADGGIRFSGDIAKAIAAGSACVMIGSLLAGTDESPGDIFLYQGRSFKSYRGMGSVAAME---RGS---…	LTYNDFLVLPGHINFPASDVSLQSKATKNIVLNTPFLSSPMDTVTEDRMAIALALHGGLGIIHHNCSAEEQAAMVRRVKKYENGFITDPLCLGPDATVGDVLEIKAKFGFCGVPITETGEPDSKLLGIVTGRDVQF-QDAETPIKSVMTTEVVTGSSPITLEKANSLLRETKKGKLPIVDSNGHLVSLVARSDLLKNQNYPYASKVPESK-QLYCGAAIGTRPGDKDRLKLLAEAGLDVVVLDSSQGNSVYQIEFIKWIKQTYPKIDVIAGNVVTREQAAQLIAAGADGLRIGMGSGSICITQEVMAVGRPQGTAVYAVAEFASRFGIPCIADGGIGNIGHIAKALALGASAVMMGGLLAGTTESPGEYFYHEGKRVKVYRGMGSIEAMEHTQRGSASG…	7e-100	313	801	470	38.72	182	262	279	8	26	59.36	44562	1	2FYDN1VF1LVRL1EGFHSI1VFLPPARS1IVDSILSQTSRKIAAT1DNFITV2LT1IFML1ASAP2QT2DESD1LM3ML1QLAH4VI2RH1FC1PASE2VA1QM1HRQR3FY1SN1MFVIVTND1VLTCILSG1YD2LVAG1AV1AELIMKKA1YFSGIFSC1IV1VIVT1STDGVE-P-DGS2VL2LV1NG3RQ1A-SQND1QEQTAPVIGKESLV2RTNELVIV1VGKSKSTPVINT2NK1KNAS2HRQEHTRKIKEG2LPVI2DSDN1CHCLIVGS1IVTAVRKS1ILELRKSN1LNNY1NY1TS1-V-PDE2G-RQ1RYVCAG2VISGVTARKPDGIDAK2VLGKPL1FADEVANGVL1LV2VL1TSASHQ1HN1QVKYVQLIDEAFVIVKQW2…	N/A	N/A	N/A	N/A	N/A	N/A	N/A	N/A	91	91
CLIBASIA_00785	0	CLIBASIA_00785	P0A1D7#PHI:3040#ClpP#28901#Salmonella_enterica#reduced_virulence	P0A1D7#PHI:3040#ClpP#28901#Salmonella_enterica#reduced_virulence	0	0	P0A1D7#PHI:3040#ClpP#28901#Salmonella_enterica#reduced_virulence	P0A1D7#PHI:3040#ClpP#28901#Salmonella_enterica#reduced_virulence	1	208	1	206	MSFEGCAKKDSEDVFLGLVPMVVEQTNRGERSYDIYSRLLKERIVFVTGQIEDHMATLICAQLLFLEAENPQKEISLYINSPGGVVTAGMAIYDTMQFIKPPISTFCMGQAASMGSLLLSAGEKGMRFALPNARILLHQPSGGFSGQASDIERHAQDIVKIKRRLNEIYVKNCGKTYEEVEKTLDRDHIMSASEACDWGVVDKVLMSR	MSYSG--ERDNLAPHMALVPMVIEQTSRGERSFDIYSRLLKERVIFLTGQVEDHMANLIVAQMLFLEAENPEKDIYLYINSPGGVITAGMSIYDTMQFIKPDVSTICMGQAASMGAFLLTAGAKGKRFCLPNSRVMIHQPLGGYQGQATDIEIHAREILKVKGRMNELMAHHTGQSLEQIERDTERDRFLSAPEAVEYGLVDSILTHR	2e-99	290	742	208	62.02	129	77	173	1	2	83.17	44562	1	2FYES1C-A-KEKR1SNELDAVPFHLMGA5VI3NS5YF10IVVI1VL3IV5TN2CV2LM8QE1ED1SY9VI4AS10PDIV2FI9SALF2ST2EA2MK2AC3AS1IVLMLI3SL2FYSQ3ST3RI2QRDE1VL1IV1RG1LM2ILYMVAKHNHCT1KQTSYL1EQVI1KRTDLTDE2HRIFML2SP2CVDEWY1VL2KSVI1MTSH1	N/A	N/A	N/A	N/A	N/A	N/A	N/A	N/A	96	96
CLIBASIA_04775	0	CLIBASIA_04775	Q5ZVD8#PHI:6520#LpdA#446#Legionella_pneumophila#effector_(plant_avirulence_determinant)	Q5ZVD8#PHI:6520#LpdA#446#Legionella_pneumophila#effector_(plant_avirulence_determinant)	0	0	Q5ZVD8#PHI:6520#LpdA#446#Legionella_pneumophila#effector_(plant_avirulence_determinant)	Q5ZVD8#PHI:6520#LpdA#446#Legionella_pneumophila#effector_(plant_avirulence_determinant)	4	456	13	461	DVAVVGGGPAGYACAIKAAQLKNKVAIIEKEKTYGGTCLNIGCIPSKALLHASEMYSHIAKEAGDLGINIASCHLDLKKMMSYKKSIVESNTQGINFLLKKNKIITYHGSARIVSNNKILVKGSSSEETIEAKNIVIATGSEASGLPGMSIDFDEQVIVSSTGALSFSSVPKNLLVIGAGVIGLELGSVWTRLGSCVKIIEHSGTILNGMDKEIAAHCLKIMSKQGMNFQLNSKVSSVKKVKGKAQVVYRSTD-----DEPINIEADAVLVAAGRRPYTKGLGLEEIGINIDHRGCIEIGGQFQTSISTIYAIGDVVRGPMLAHKAEDEGIAVAEIISGQKGHVNYGIIPSVVYTHPEVASIGKTEEQLKCEKKSYKVGKFPFSANGRARSMNSIDGFV…	DVVVLGSGPGGYTAAFRAADLDKKVVLVERFDSLGGVCLNVGCIPSKALLHIAKVVDE-AHEMSEQGVAFGKPKFDNKKLVAWKNSVVAKLTGGLKALAKQRKVEVITGTGKFSGTHQILVETKEGTVEIEFDNAIIAVGSESIKLPFIP---EDKRIFSSTGALELADIKGDLLVLGGGIIGLEMATVYSSLGVNVTVVEFMDQLIPNADADLVNILQKRMTKKGVKFLLKTKVTAVE---AKKDGIYVSMEGEHATDKPLCFQQ--VLVSVGRKPNGGAINAEKAGIKVDERGFIPVDNQLRTNVPHIFAIGDVNGQPMLAHKAIPEGKVAAEVIAGKKHYFEPKCIPSVAYTDPELAWAGLTEKEAKEKGINYEKASFPWAASGRALSMGREEGMT…	2e-99	308	790	458	37.99	174	270	272	5	14	59.39	44562	1	2AV1VL1GS2AG2ATCA1IFKR2QD1KDNK2AVILIV1KREFKDTSYL2TV3IV10AISAEKMVYVSDHEI-1KH1AMGSDELQ1IVNAIFAGSKCPHKLF1LN2MLMVSAYW1KN1IV1EASKNL1QG1ILNKFA1LA1KQNR1IVIETVYIHT1STAGRKIFVSSGNTNHKQ3KEGTSKSESGETEVTE2AFKD1IAVI2TV3ASSIGK2GFMISPI-D-F-DEEDQKVR1VF6SEFLSASDVIPKKGND3IL1AG1VI4LMGAST1WYTSRS2SVCN1KTIVIV1HFSMGDTQILLINPGNMA1KAEDILAVANHICLLQ1IR1ST1QK1MVNK1QL1NKST2STSA1KEK-V-K-GA1AKQDVGVI1RV1TMDE-G-E-H-A-T1EK1ILNCIFE…	N/A	N/A	N/A	N/A	N/A	N/A	N/A	N/A	97	97
CLIBASIA_05100	0	CLIBASIA_05100	J5K1T7#PHI:9409#Krs_(BBA_03037)#176275#Beauveria_bassiana#reduced_virulence	J5K1T7#PHI:9409#Krs_(BBA_03037)#176275#Beauveria_bassiana#reduced_virulence	0	0	J5K1T7#PHI:9409#Krs_(BBA_03037)#176275#Beauveria_bassiana#reduced_virulence	J5K1T7#PHI:9409#Krs_(BBA_03037)#176275#Beauveria_bassiana#reduced_virulence	5	493	79	590	LTPESLSSNSIEVRSQKLNMLRKSLAEVYPAHFH--RDITNAEVREKYSHLQNDEKSQDM-ITVAGRVYSSRNSG---MFMDIHDASGKIQIFTHKDTADQDSQNLLSM---IDIGDIIGITGQVRRTK----------RGELTVNAQKIIMLSKALNSIPETYYGLSDVEIRYRKRYLDIISNSDSKIRFQQRSLLISQIRHFMEKKGFMEVETPILQPIYGGATADPFKTHHNILKADMYLRIAPELYLKRVLISGLTDQVFELNRNFRNEGVSSRHNPEFTMIEAYWAYTDYRDMMKLVEDLCHNLAKTLHGTTDIPF----GEKV-ISFKAPFACKSMLQLVKEATGLDFM---LLKSDQEARVAAQSIGIT-VE-NDALWGEVMM-TIFEEKIE…	LTP----NQYFEIRSRTVNELHEQ-GKAYPYKFEVTYDIRNFE--KEFSHLKNGEIDKTKPLSLAGRIYVRRAAGSKLFFYDLRSNGTRLQVLAQADHLGEGVPSFEEQHINIRRGDIVGIRGYPTRTNPKTKQGQGEFSGELSIAASELILLSPCLHQIPDDHYGFKNPEQRFRQRYLDLMMNDKARDVLITRAKVDTYIRRWFDDRDFVSVQTPMLNTIAGGATAKPFITHHNDLNMDMFLRIAPELYLKMLVVGGL-DRVYEMGRQFRNESMDLTHNPEFTTLEFYMAYADVYDLMKMTEELVSGLVKHVHGSYITKYHNSKGEELEINWEGPWRKIDMIPALEEITGEKFPTGDVLHTAETGEFLKKVLAKTGVECNPPLTNARMLDALVGEYLE…	6e-99	312	799	520	37.12	193	288	291	16	39	55.96	44562	1	3E-S-L-S-SNNQSYIF1VI2QRKTLV1ME1RHKESQL-AGEKVA2AYHK1HE-V-TRY2TR1AF1V-R-EKKEYF3QK1DG1KISDQKDTMK-PILTSVL3VI1SVSR1NASA1-S-K-LMF1MY1ILHRDSANSGGTKRIL1IVFLTAHQKA1THALDGQEDGSVQPNSLFLESEMQ-H-I-N1DRIR3IV2TR1QYVPRT2KN-P-K-T-K-Q-G-Q-G-E-FRS3TSVINA1QSKEIL1ML2KPAC1NHSQ2EDTDYH2LFSKDNVP1IQ1YF1KQ4ILIMSM1SDDKSAKRIDRVFLQIQT1SALKLVIDSTQY2HRFWMFEDKDKRGD1MVES1EQ2IM1QNPT1YA5DK2KI4ID1KNAM2YF10RMVLLVIVSG2T-1QR1FY1LMNG1NQ…	N/A	N/A	N/A	N/A	N/A	N/A	N/A	N/A	97	97
CLIBASIA_03870	0	CLIBASIA_03870	A0A0H3HVK0#PHI:5335#ClpV-5#28450#Burkholderia_pseudomallei#effector_(plant_avirulence_determinant)	A0A0H3HVK0#PHI:5335#ClpV-5#28450#Burkholderia_pseudomallei#effector_(plant_avirulence_determinant)	0	0	A0A0H3HVK0#PHI:5335#ClpV-5#28450#Burkholderia_pseudomallei#effector_(plant_avirulence_determinant)	A0A0H3HVK0#PHI:5335#ClpV-5#28450#Burkholderia_pseudomallei#effector_(plant_avirulence_determinant)	11	462	18	487	RNVLQSAQTYALAQGHQNLVPEHVLHIFLEDEQGAVYSLIQCSGGDIAQLKDYNQTVLSKIPKVTGGGAQVYLSQPLAVILSKSEEIAK-KSGDSFVTAEKFLLAMVM------ETGG--IGESLKKCGLKFSRLEESIKKLRKGRVADSVNAEQG--------FDALKKYCRDLTEEARNGKLDPVIGRDDEMRRAIQVLSRRTKNNPVLIGDPGVGKTAIIEGLASRIINGDIPESLKGKRLMALDMGALIAGAKFRGEFEERLKSLLCEIRSEDGEIILFIDELHVLVGAGKTDGAMDASNLLKPSLARGELHCIGATTLDEYRKYIEKDPALARRFQSLLVGEPTVTDTISILRGLKERYEQHHKVRISDSALVSAAVLSNRYITDRFLPDKAID…	RNALESAVGACVARRHDDVAVEHLLARLCDEPSADVALLLRACGADAARLRRQADAALDARP--AGDGGRPAFAPSLLALLQDAWLIASLELGDTHIRSAAVLAAAVARAARQPSPGGDDVLQSLRKDALVARFASGACARSIESRASGALDAAPGEASDTRDASSAIARYCEDFTAKARAGGIDPVFGRDAEIRQIVDILARRRKNNPVCVGEPGVGKTAIVEGLALRIAEGDVPATLRGATLLGLDLGMLQAGASVKGEFEQRLKRVIAEIRASQTPVVLFIDEAHTLIGAGGAAGASDAANLLKPALARGELRTIAATTWSEYKKYFEKDAALARRFQPVKLDSPDVATSVMILRGLKERYQDAHGVTIRDDALVAAAELSARYITGRQLPDKAID…	3e-98	330	847	472	42.37	200	250	285	6	22	60.38	44562	1	2VA1QE2QVTGYAACLV1QRGR1QDNDLVVAPV2VL1HAIRFLLCEDDEEPQSGAAD1YASL1ILQRCASC1GA1IA1QR1KRDRYQNAQDTAVA1SDKAIR1K-V-TA1GD1AGQRVPYALFSAQPPS1ALVAIL1SQKDSAEWEL2KS-LKESL2STFHVITRASEAKAFV1LA1MA1MA-R-A-A-R-Q-PESTP2-D-DIVGLEQ2KR1CDGA1KVFASRRFLAESEGSAICKAKRLSRIKEGS1VAASDGSAVLND1EAQP1-E-A-S-D-T-R-D-AFSDS1LIKAKR2RE1LF1EAEK2NA1KGLI3IF3DA1MI1RQAIIVQDVI1SA2TR5LCIV1DE8IV4SL2IANE2IV1EAST1KR1KART1MLAG2ML1AM1IQ3KSFVRK4EQ3…	N/A	N/A	N/A	N/A	N/A	N/A	N/A	N/A	88	53
CLIBASIA_02815	0	CLIBASIA_02815	Q2FIE9#PHI:9458#LipA_(SAUSA300_0829)#1280#Staphylococcus_aureus#reduced_virulence	Q2FIE9#PHI:9458#LipA_(SAUSA300_0829)#1280#Staphylococcus_aureus#reduced_virulence	0	0	Q2FIE9#PHI:9458#LipA_(SAUSA300_0829)#1280#Staphylococcus_aureus#reduced_virulence	Q2FIE9#PHI:9458#LipA_(SAUSA300_0829)#1280#Staphylococcus_aureus#reduced_virulence	34	314	5	286	DTEKMQKPDWIRVRAPVSSGYKETYNILRSRNLTTVCEEAGCPNIGECWN-KNHATFMILGAICTRACTFCNVATGKPQPLDPQEPENISWAVRSMKLSHVVITSVDRDDLDDGGAQHFAEVISAIRESAPSTTIEVLTPDFLRKPHALEKVVSAKPDVFNHNLETVASNYLMVRPGARYFHSLRLLQRVKELDPLIFTKSGIMLGLGETRNEILQLMDDLRTADVDFLTMGQYLQPTRKHHKVESFVTPQDFKSYETIAYSKGFLMVSASPLTRSSYHAGD	NEEILRKPDWLKIKLNTNENYTGLKKMMREKNLNTVCEEAKCPNIHECWGARRTATFMILGAVCTRACRFCAVKTGLPNELDLNEPERVAESVELMNLKHVVITAVARDDLRDAGSNVYAETVRKVRERNPFTTIEILPSDMGGDYDALETLMASRPDILNHNIETVRRLTPRVRARATYDRTLEFLRRSKELQPDIPTKSSIMVGLGETIEEIYETMDDLRANDVDILTIGQYLQPSRKHLKVQKYYTPLEFGKLRKVAMDKGFKHCQAGPLVRSSYHADE	5e-98	294	753	282	51.06	144	137	184	1	1	65.25	44562	1	DNTE1KIMLQR4ILRKVIRKALPNVTSNSEGN1KTEGTLYKNKIMLM1SERK2TN6GK4GH3NG-AKRNRHT8IV5TR2NA1AK2KL1QNPE2PLQN3NRIVSAWEAS1RESL1KN1SK5SA1DA4DR1GA1ASQNHVFY2VTIVSRAKIV2SRAN1SF4VI1TPPS1FMLGRGKDPYHD3KTVLVMSAASKR2VIFL3LI3ARSRNLYTLPMR2PAGR1RT1FDHRST1RELF1QR1VS3DQ1LD1FP3GS2LV5RINE2LYQELT5TAAN3FI2MI6TS3HL2EQSKFYVY2QLDE1KGSKYLERTKIV1YMSD3LKMHVCSQ1SG2TV6GDDE	N/A	N/A	N/A	N/A	N/A	N/A	N/A	N/A	85	85
CLIBASIA_05385	0	CLIBASIA_05385	J4KQS2#PHI:8671#Phr1_(EJP69699)#176275#Beauveria_bassiana#unaffected_pathogenicity	J4KQS2#PHI:8671#Phr1_(EJP69699)#176275#Beauveria_bassiana#unaffected_pathogenicity	0	0	J4KQS2#PHI:8671#Phr1_(EJP69699)#176275#Beauveria_bassiana#unaffected_pathogenicity	J4KQS2#PHI:8671#Phr1_(EJP69699)#176275#Beauveria_bassiana#unaffected_pathogenicity	1	465	89	573	MKATTAMSVHLVWLRNDLRITDNKALYAACHNS---DAKVIAVFIATPEQWRQHGISARQSHFIYASLLQVQKSLSQKGIVFQYHQCSNFDDS----IEWLDSYCLQQRVTKLFYNRQYEINEVRRDKLLEKRLQHRVICKSFD---DSVLLPPGSILNHALQMYKVYTPFRKA----LIQNLVQADLRSLPVPAIRLTGPVTPSNIPRFFDYPFQAIDP------------------MFPIGEQNALHILRKFCKEKVYYYVEQRDIPAIQGTSQLSPYLSIGVLSPRQC----WNRLKEEFVDLLIKPKSGAFSWLNELIWREFYRHLMAFYPSVCMGKPFIPWTEKIEWNKDSHLLQAWKQGYTGFPIIDAAMRQLNTIGWMHNRLRMITASFLVK…	MKKAAQGEAVAHWFKTDLRCADNTSLALAAQKAKEMNVPLLCFYLVSPQDFEAHLRSPVRVDFILRTLKVLKEDLAKLDIPLYVETVEERTKVPARVLELLESWGCNH----LCANLEYEVDELRRETKIIRLLA--ANSKSFEAVHDTCVVPPGQLRSGTGNQYAVYTPWYRAWMAHIHSNLDLLELHDAP--------PKNPASARKRFQKLFECEIPAAPKGKALSAEEQKRFHSLWPCGEHEAKARLDKFCEERIGGYSQQRNLPSQNGTASISVHLASGTISARTCVRTARDRNKSKKLD---SGHEGIKVWISEIAWRDFYRHVLVRWPHICMNKPFKPDYADIEWSYNTEHFNAWCEGKTGFPIVDAAMRQLNHMGYMHNRPRMVVASFLCK…	2e-97	307	787	502	35.46	178	270	270	11	54	53.78	44562	1	2AKTATAAQMGSEVAHVLAVH1LFRKNT3ICTA2KTAS1YAAL1CAHQNKSA-K-E-MDNAVKPVLILACVFFYILAVTS1EQQDWFREQA1GLIR1APRVQRSVHD2YLARST1LKQVVLQKKESD1SAQKKLGD1VPFLQYYVHEQTCVSENEFRDTDKSV-P-A-R-VIL1WL1DE1YWCGLCQNQHR-V-T-K-1FCYA1RLQE2IVND1VL2DEKTLKLIEIKRRL1QAH-R-VAINCS3DE-A-V-H1STVCLVLV3SQILLRNSHGATLGQNMQ1KA4FWRYKR1-W-M-A-HLIIHQS2VDQLALDE1RHSDLA1V-P-A-I-R-L-T-G-1VKTN1SANSIAPRRKFR1DQYKPL1QEACIEDI1-A-A-P-K-G-K-A-L-S-A-E-E-…	N/A	N/A	N/A	N/A	N/A	N/A	N/A	N/A	96	96
CLIBASIA_00765	0	CLIBASIA_00765	I1S2C4#PHI:5068#MCC#5518#Fusarium_graminearum#reduced_virulence	I1S2C4#PHI:5068#MCC#5518#Fusarium_graminearum#reduced_virulence	0	0	I1S2C4#PHI:5068#MCC#5518#Fusarium_graminearum#reduced_virulence	I1S2C4#PHI:5068#MCC#5518#Fusarium_graminearum#reduced_virulence	1	443	642	1087	MISKILIANRGEIALRILRACKELGIPTVAVHSTADSGAMHVRLADESVCIGPPSSKDSYLNIQQIVAACEVTGADAIHPGYGFLSENAKFAEILEDHHIKFIGPSSEHIKIMGDKITAKKTAQQLGIPVVPGSGEVYPHTAMPI--AKEIGFPVLVKASAGGGGRGMRIAYSENDLSEAIDQARSEALAAFGNDAVYIEKYLENPRHIEVQIFGDGMGNAIHFGERDCSVQRRNQKIWEEAHSPVISAQDRTEIGETCVKAMKKIDYRGAGTIEFLY--ENGQFYFIEMNTRLQVEHPVTEAITGIDLVHEQIYVASENRLSVQQKDITFSGHAIECRINAEDP-ENFIPNPGEITYFHAPGGLGIRMDSASYQGYTVPSYYDSLIAKLIVHGKNRKE…	FISTILVANRGEIAVRIIETVHKMGLRAVAIYSDSDANATHVSRADLALKLRGASVSDTYLNMDQILELAVHSSVDAIIPGYGFLSENADFAAAVEDRGMTWVGPTPQQMAELGLKHRARSIAVKVGVPVIPGCEMLLESLKEAILESNKIGFPLMLKSTAGGGGIGLSYCKDVEGLSATFEVVQRQAVANFGDGGVFLERYIERARHVEIQILGDGTGRVVSAGERDCSLQRRHQKIVEESPAGMIPKSVRTEMKEAALRLASSVRYRNVGTVEFIYDLDTKEYYFLEVNTRLQVEHPVTELVTGLDLVECMLNIANGNATQLFEANFPTTGASIEVRVYAENPLRSFRPCFGCVTALEFPSSL--RVDTWVKVDTEITTSFDPLIAKLVSFGADREE…	4e-97	320	821	448	37.72	169	272	269	4	7	60.04	44562	1	MF2KT2IV7LV2LIREATCVKHEKLM1ILPRTA2VIHY1TDAS1SAGN1MT2RSLR2ELSAVLCKILGRPGPA1SVKS1ST3IMQD2VLAEALCAEVVHTSGSAV3HI10KD2EAIALV2HRHGIMKTFWIV2STSPEQHQIMKAIEML1DL1IHTR1KRKSTI1QVQKLV1IV2VI2SCGEEMVLYLPEHSTLAKMEPA1-L-EASKNEK4VLLMVL1ASST5RI1MLRSIYACYKSDEVNEDG2EAATIFDEQVAVRQSREQ1LV1AN2NDDGAG1YFIL1KR1LI1NRPA2IV1VI2FL3MT1NRAVIVHSFA6VL3NH3WV2ASHPSAPGVM1SPAKQSDV3IMGK1TACAVLKRALMAKSKSIVDR2GNAV2IV2LI1-D-LEDNTGKQEFY2I…	N/A	N/A	N/A	N/A	N/A	N/A	N/A	N/A	100	100
CLIBASIA_02815	0	CLIBASIA_02815	V5VBJ6#PHI:6492#LipA#470#Acinetobacter_baumannii#reduced_virulence	V5VBJ6#PHI:6492#LipA#470#Acinetobacter_baumannii#reduced_virulence	0	0	V5VBJ6#PHI:6492#LipA#470#Acinetobacter_baumannii#reduced_virulence	V5VBJ6#PHI:6492#LipA#470#Acinetobacter_baumannii#reduced_virulence	23	312	12	308	RLRHPEKIHK------PDTEKMQKPDWIRVRAPVSSGYKETYNILRSRNLTTVCEEAGCPNIGECWNKNHATFMILGAICTRACTFCNVATGKPQPLDPQEPENISWAVRSMKLSHVVITSVDRDDLDDGGAQHFAEVISAIRESAPSTTIEVLTPDFL-RKPHALEKVVSAKPDVFNHNLETVASNYLMVRPGARYFHSLRLLQRVKELDPLIFTKSGIMLGLGETRNEILQLMDDLRTADVDFLTMGQYLQPTRKHHKVESFVTPQDFKSYETIAYSKGFLMVSASPLTRSSYHA	KLRGAEKVARIPVKVVPTVEVPRKPDWIRVKMTAPEEVQRIKTTLRAQKLHTVCEEAACPNLPECFGGGTATFMIMGDICTRRCPFCDVAHGRPNALDPDEPRHMAETIANLKLKYAVITSVDRDDLLDGGAQHFVDCIKEARALSPNTLLEILVPDFRGRMDIALRIMTECPPDVFNHNIETVPRLYKAMRPGSDYQHSLNLLKMFKEYCPDIPTKCGLMVGIGETEEEVIALLDDLRAHDVDYVTIGQYLQPSKQHAPIDRFVTPEEFERYAEHGRKLGFRNIWSAPMVRSSYFA	6e-97	292	748	297	48.15	143	147	194	2	7	65.32	44562	1	RK2HGPA2IVHAKR-I-P-V-K-V-V1DTTV1KVMPQR7RKAMPTVASPSEGEYVKQERTIYKNTIT2SARQNK1TH6GA3ILGP2WFNGKGNGHT5LM1AD4AR1TP2ND2TH1KR1QNPA3QD2ERNHIMSAWEATVIRASNML2SKHYVA10DL7AVEDVC1SKAEIA1EASLAS1SN1TLIL1VI1TV3LR-G1KMPDHI2ERKIVMVTSEACKP7LI3APSRNL1LKMAVM3ASRD1FQ3RN2QKRMVF2LYDC1LD1FP2SC1IL1LV1LI3RENE1IVLIQA1ML4TAAH3FYLV1MI6TSRKKQ1HAKPVIEDSR4QEDE1KESR1EATEIHAGYRSKKL2LRMNVISWASSA1LMTV4HF1	N/A	N/A	N/A	N/A	N/A	N/A	N/A	N/A	88	88
CLIBASIA_01995	0	CLIBASIA_01995	Q8GA91#PHI:6829#AscV#645#Aeromonas_salmonicida#reduced_virulence	Q8GA91#PHI:6829#AscV#645#Aeromonas_salmonicida#reduced_virulence	0	0	Q8GA91#PHI:6829#AscV#645#Aeromonas_salmonicida#reduced_virulence	Q8GA91#PHI:6829#AscV#645#Aeromonas_salmonicida#reduced_virulence	18	691	32	719	HDFAFSFCIVLIICILFLPIPTVLLDVGLASSIALSILILMVALWIEKPLEFSSFPTVLLIVTIIRLSLNIATTRAILSFGHEGYGAAGGIIAGFSSLVMSGDFVIGLVVFMILITINFIVITKGATRIAEVGARFTLDAIPGKQMAIDADLSSGLIEEEEAKRRRKELEEESAFFGAMDGASKFVRGDAIASIIITAINIVGGIVIGCFRYDMSIHHAADVFVRLSVGDGLVSQVPALIISLSAAFLVSRTTSKGSTN--TAIVEQLSHYPRALLISAFFMIVLSVMPNLPAFPFIMLGGFFACAGFYVPYKNELQRLAKVAQIQE--------------------ASKQNQHSAQLNFITSGVELVLGSLVSNRLLSSQEDLFL--RVSKIRRKFAV…	KDIMLAILLLAIVFMMVLPLPPVALDILIAINMTISVVLLMMAVYINSPLQFSAFPAVLLITTLFRLALSVSTTRMILL-----QADAGQIVYTFGNFVVGGNLVVGIVIFLIITIVQFLVITKGSERVAEVSARFSLDAMPGKQMSIDGDMRAGVIDVHEARDRRGVIEKESQMFGSMDGAMKFVKGDAIAGLIIIFVNILGGVTIGVTQKGLSAADALQLYSILTVGDGMVSQVPALLIAITAGIIVTRVSSEESSDLGTDIGAQVVAQPKALLIGGLLLVLFGLIPGFPMITFFALSAIVTAGGYFIGLR---QRKAQSSNSQDLPAVLAQGAGAPAARSKPKPGSKPRGKLGEKEEFAMTVPLLID--VDAALQAELEAIALNDELVRVRRALYL…	1e-96	315	807	702	30.48	214	446	370	12	42	52.71	44562	1	HK1FIAMFLSAFICLILVLLA1IVCFIMLMFV2IL1TP1LA2VIGLLI1SISNIMATLI1IVLVIL2VM1LVWY1ENKS2EQ2SA2TA4VT1ILIF2SA1NSIVAS3AM2SLF-G-H-E-G-YQGAAD2GQ1IVAYGT1SGSNLF1MVSG1DNFL1IV1LI1VI1ML1LIITTIIVNQ1IL5ASTE1IV3GS3TS3IM5AS2AG1LMSRSA1LV1EDEVEH2KRRD2KGEVLI1EK2AQFM2AS4SM3RK5SGIL2TIAFIV2VL2IVVT2CVFTRQYKDGML1IAHAHD1ALDQVLFYVSRI1ST4LM7IL1SALIST1AGFILI1ST1TVTS1KEGE1TSND-L-G1AD1VGEA1LVSVHAYQ1RK4SGAGFLFLMLIVVLLFSGVLMI1NGLF1AM…	N/A	N/A	N/A	N/A	N/A	N/A	N/A	N/A	97	97
CLIBASIA_02460	0	CLIBASIA_02460	A0A0H3PAK7#PHI:10727#PepP_(CJJ81176_0681)#197#Campylobacter_jejuni#reduced_virulence	A0A0H3PAK7#PHI:10727#PepP_(CJJ81176_0681)#197#Campylobacter_jejuni#reduced_virulence	0	0	A0A0H3PAK7#PHI:10727#PepP_(CJJ81176_0681)#197#Campylobacter_jejuni#reduced_virulence	A0A0H3PAK7#PHI:10727#PepP_(CJJ81176_0681)#197#Campylobacter_jejuni#reduced_virulence	16	609	6	595	ERVHNLRSCFDSLGMDAFLVPRVDEYRGEFVDKGSERLAWLSGFTGSAGIAIVLRQKSVIFVDGRYTLQVEKEVD-TALFTIKNIAIEPLHAWISEHGFVGLRLGLD-SRLHSSFEVDLLQKSLDKIEGVIVDVPYNPIDSLWKDRPQRLYRKVAMQDMAYAGRESQEKIRDICKILHQKEVGAVFICDPSSIAWIFNIRGFDIPCSPYPLSRAILYADGKAEIFFDKQYINEQLKALLSAVAIVL-DMDMMDSRLVCLARTSMPILIDPKWISYRFFKVIAQKNGVMVEGSDPSCLLRATKNKVEIEGMQTAHIQDGVAMVYFLFWFYS--QSLETITEIDIIKKLERCREEIGCKMRNPLRDIAFNTIAASGPHAAIIHYQATVQSNRLLQKDELLL…	QRVLELRRLMKENNIDAYLILSADPHLSEYLPEYYKNRVFISGFKGSVGTVLITQEEGFLWVDGRYWLQAQKELEGSGILLQKQDAKNTFTKWLEKNLSEDQILGIDFALLPLSLQKDLKINCKANLKHI------DLISPLWKDRPTLPQEKIYEHELEYCSYSRKEKLALVRQKMKNLNATSHLISSLDDIAWLTNLRGNDVNYNPVFLSHLLILED-KALLFVDQKKVNSELEKKLNLDGFWLKNYDEIIMELEKLANTNL--LIEPSKMTALLINSL-DKSVKIIQEINPSTHLKAVKNTKEIAHIQDAMIEDGVALCKFFAWLEEAIENKELISELDIDAKASEFR----AQSKHYISD-SFATIAGFNENAAYPHYKATKESFAYLKKDGLLL…	1e-96	310	793	609	34.15	208	367	328	15	34	53.86	44562	1	EQ2HLNE2SRCLFMDKSELNGNMI2FY1VIPLRSVA1EPYHRLGS1FYVLDPKEGYSYEKRNLRAVWFLI3TK2AV1ITAVILVILTRQQEKESGVFILFW5TW2VAEQ2VLDE-GTSAGLIFLTLIQ1NQID1IKENPTLFHTAK1ILSEEKHNGLFSVEGDLQRI2LI1-FSARL1HPSL1FLEQVK2LKQIKNSCLKDAKNILEKGHVII-V-D-V-P-Y-NDPL1DSSP6QTRLLPYQRE1VIAYMEQHDEMLAE1ACGSRYESSRQK2ILRADLIVCRKQIKLMHKQNKLENVAGTASVHFL1CSDSPLSDSD3ILFT1IL2FN1IVPNCYSN1YVPF2RHALILLIYLAE1G-2ELIL1FV1KQQKYKIV1ESQE1KEAKLK1SNALVDAGIF…	N/A	N/A	N/A	N/A	N/A	N/A	N/A	N/A	98	98
CLIBASIA_04085	0	CLIBASIA_04085	Q8PGL8#PHI:2481#RfbC#346#Xanthomonas_citri#reduced_virulence	Q8PGL8#PHI:2481#RfbC#346#Xanthomonas_citri#reduced_virulence	0	0	Q8PGL8#PHI:2481#RfbC#346#Xanthomonas_citri#reduced_virulence	Q8PGL8#PHI:2481#RfbC#346#Xanthomonas_citri#reduced_virulence	8	602	30	601	VVKSLLRKIKLKFPSRHKRRIIKFENFEKEYREWSSL-----FHDTSPQFTKKILQNISQWQNKPLISVIMPVYKIKKEWLEMAIESVRSQIYSHWELCIAEDCSGDIETVSLLKKYANMDSRIKVVFRAKNGHISAASNSAAQLATSEWLALLDHDDLLHPTALYYVADAINNNPNAEIIYSDEDKINENQIRSGPYFKYDFNPELFHVHNMITHLGVYRTETFKKIGGFREKFEGAQDYDLVLRFLENIDLSQIIHIPRVLYHWRMHDNSTAQKIGNKNYAGKAGERALNEHFQRTGIAAKAVFDGAQ---------YRTHYMIPNPPPLVSIIIPTYNHHHLLKICLESIYHKTTYSSFEVIIIDNLSDDSKTFLYLQKIQKKYPNLRVITDNTHP…	LVRACLRE-GAKGPRHFARRMAAYASGGSASPPPVSLDAYESWHSALPQLEVP--------ADSGMISVIIPVCNTPELFLREAIESVRTQTYQNWEICIHDDASNEPHVGRILAEFKKRIPNLRVTRSETRSGIAATTNAALASARGRWVTFLDHDDVLDRNALAAVVDC-HIKTGSAVVYTDHDMLGEDGRLRNPYFKPDWNYDLFLAQMYLGHLVSFEHDLIKRVGLTRSECDGSQDYDLVLRCVAA--GAKVGHVPRVLYHWRMHAGSTAANADSKPYAHDSGKRAIQYHVD-------AVYPGAQVEDGPHLFCYDVRYPYAQHAPKASIIIPTRDGLDLLRPCIESIQGRTDYTNFEIIVVDNGSKDPATLEWLDAMSNE-PWFRVLQADV-P…	1e-96	310	795	614	34.53	212	341	311	15	61	50.65	44562	1	VL1KRSALC2KEI-KGLA1FG1SRRHHFKA2IMIAKAFYEANSFGEGKSEAYSRPEPWPSV2-D-A-Y-E-SFW1DSTASL2FLTEKVKPI-L-Q-N-I-S-Q-W-QANDKSPGLM4MI2YCKNITKPKEELWF1ERME6ST1IT1SQHN2LI2AHED1CA1GNDEIPEHTVVGSRLI1KAKEYFAKNKMRDISPRNILKR1VTFRRSAEKTNRGSHG1SA1ATST1SA1ALQALS1TRSGER1LVATLF5LV1HDPRTN2YAYA1AV1ACI-NHNINKPTNGASEAIVIV1ST1EH1KMILNG1NDQGIRRLSRGN4YP1FW1PYED2HLVAHQNMMYILTG2GVVSYFRETHEDTLFI1KRIV1GLFT1ESKEFCED1AS8FCLVEANAI-D-LGSA…	N/A	N/A	N/A	N/A	N/A	N/A	N/A	N/A	96	96
CLIBASIA_00425	0	CLIBASIA_00425	Q5NFT3#PHI:4734#HemH#263#Francisella_tularensis#unaffected_pathogenicity	Q5NFT3#PHI:4734#HemH#263#Francisella_tularensis#unaffected_pathogenicity	0	0	Q5NFT3#PHI:4734#HemH#263#Francisella_tularensis#unaffected_pathogenicity	Q5NFT3#PHI:4734#HemH#263#Francisella_tularensis#unaffected_pathogenicity	15	339	7	329	KFGKIGVLLVNLGTPDGHDFFSLRRYLREFLLDKRVVELPSWQWRPILFGYILNFRPSKIKHAYAKIWNTAKNESILRTHTRDQATNLAKRLESISSIVVDWAMRYGKPSVKEIINNLREEGCDRLLIFPLYPQYSAATTGTAQDKVFQELIHMRWSPSLRTVPPYYEDSDYISALAQSIREHFESIQWTPEMLLVSFHQMPVSYLLKGDPYGCHCHKTARLLKEFLS--WPDDRFKICFQSRFGRIKCLEPPTDKTVEKLAHDGIKSLAIITPGFSSDCLETSYEIAHEAKEIFVNGGGEKFTQVPCLNSSNLSIDLLEKITRREL	KYNKQAILLVNLGTPDNYDTKSIKRYLKEFLSDPRVIEANPVLWKIILNLIILPIRAKKNVHTYKTVWNKQHNKSPLLFYTENLADKLDKKLDNY---IVDYAMRYGNPSIESKIKSLQDQGATEIIIFPLYPQYSATTTATVYDEVYRVLSKLRWQPTIKGINPYYDNKFHIQTISQQIKEHLKKLDSTPDTVLFSFHGLPKEYFDKGDPYYCHCYKTYRLVKEELQNEYPNIDFELSFQSRFGPKKWLEPYTTVKLEEFTKQN-KSVVVIAPGFSADCLETLEELAISEKENFIKKGGKEFSLIPCLNDSNQHVDMLYNIIDEEI	2e-96	292	747	327	45.26	148	173	212	3	6	64.83	44562	1	1FYGN1IQGAVI9GNHY1FTFK1LIRK3RK3LS1KP2VI1LAPNSPWVQL1RKPI2FNGLYI2NPFI1PASK1INKV1AT1AKKTIV2TKAQKH1EK1IP1RLTFHY1REDNQL1TDNK1AD1RK1EDSNIYS-S-I-VI2WY5KN2VIKEESIK1NKNS1RQEDEQ1CADTRELILI10AT2GA1AVQY1KE1FYQREV1ISHKML2SQ1STLIRKTGVIPN3EDDNSKDFYH1SQATLIAS1SQ1RK2FLEKSKILQDWS2EDMTLV1VF3QGML1VKSE1LFLD5GY3HY2AY2LV2FE1SQ-N-EWY1DNDIRD1KEILCS6RPIK1CW3PY1DTKVTKVL1KELFATHKDQGNI-2LVAVIV1TA4SA5SLYE1IL1HIESAE2IN1VINKGK2…	N/A	N/A	N/A	N/A	N/A	N/A	N/A	N/A	95	95
CLIBASIA_01995	0	CLIBASIA_01995	P0A1I4#PHI:647__PHI:9467#InvA#28901#Salmonella_enterica#reduced_virulence__unaffected_pathogenicity	P0A1I4#PHI:647__PHI:9467#InvA#28901#Salmonella_enterica#reduced_virulence__unaffected_pathogenicity	0	0	P0A1I4#PHI:647__PHI:9467#InvA#28901#Salmonella_enterica#reduced_virulence__unaffected_pathogenicity	P0A1I4#PHI:647__PHI:9467#InvA#28901#Salmonella_enterica#reduced_virulence__unaffected_pathogenicity	26	691	21	685	IVLIICILFLPIPTVLLDVGLASSIALSILILMVALWIEKPLEFSSFPTVLLIVTIIRLSLNIATTRAILSFGHEGYGAAGGIIAGFSSLVMSGDFVIGLVVFMILITINFIVITKGATRIAEVGARFTLDAIPGKQMAIDADLSSGLIEEEEAKRRRKELEEESAFFGAMDGASKFVRGDAIASIIITAINIVGGIVIGCFRYDMSIHHAADVFVRLSVGDGLVSQVPALIISLSAAFLVSRTTSKGST-NTAIVEQLSHYPRALLISAFFMIVLSVMPNLPAFPFIMLGGFFACAGFYVPYKNELQRLAKVAQI---QEASKQNQHSAQLNFI-------TSGVELVLGSLVSNRLLSSQEDL--FLRVSKIRRKFAVQYGFIVPEIKVTTDISLPE…	MVMIISMFVIPLPTYLVDFLIALNIVLAILVFMGSFYIDRILSFSTFPAVLLITTLFRLALSISTSRLILI-----EADAGEIIATFGQFVIGDSLAVGFVVFSIVTVVQFIVITKGSERVAEVAARFSLDGMPGKQMSIDADLKAGIIDADAARERRSVLERESQLYGSFDGAMKFIKGDAIAGIIIIFVNFIGGISVGMTRHGMDLSSALSTYTMLTIGDGLVAQIPALLIAISAGFIVTRVNGDSDNMGRNIMTQLLNNPFVLVVTAILTISMGTLPGFPLPVFVILSVVLSVL-FYFKFREAKRSAAKPKTSKGEQPLSIEEKEGSSLGLIGDLDKVSTETVPLIL--LVPK---SRREDLEKAQLAERLRSQFFIDYGVRLPEV-------LLR…	3e-96	313	802	689	32.8	226	416	369	14	47	53.56	44562	1	IM1LM2CSIMLFFVLI1IL2VY1LV1VFGLLI1SLSN1AV1SA2IVLF1VGASLFWY1EDKRPI1ES2ST2TA4VT1ILIF2SA1NS1AS1TS1AL2SIF-G-H-E-G-YEGAAD2GE3GT1SGSQLF1MISGGDDSFLVAIV1LF3MS1LVITTVIVNQ7ASTE1IV3GA3TS2AGIM5AS5SKSA1LI1EDEAEDEA1KRRE2KSEV2ER2AQFLFY1ASMF3SM2VIRK5SG3TIAFIV1IFVI3VSIV1CMFT1YHDG1SDILHSHS1ALDSVTFYVTRM1STVI5SA1VI3IL1SALI2AG1LI1ST1TVTNSGKDGSSDTN-MNGTRAN1VMET2SLHNYN1RFAV1LVIVST1FIFLMT1VSLMSGVTML1NGLF1ALFPPV1IVMI1GSGV…	N/A	N/A	N/A	N/A	N/A	N/A	N/A	N/A	96	96
CLIBASIA_01995	0	CLIBASIA_01995	P0A1I3#PHI:6464__PHI:6588__PHI:11302#InvA__Inva#28901#Salmonella_enterica#reduced_virulence__unaffected_pathogenicity	P0A1I3#PHI:6464__PHI:6588__PHI:11302#InvA__Inva#28901#Salmonella_enterica#reduced_virulence__unaffected_pathogenicity	0	0	P0A1I3#PHI:6464__PHI:6588__PHI:11302#InvA__Inva#28901#Salmonella_enterica#reduced_virulence__unaffected_pathogenicity	P0A1I3#PHI:6464__PHI:6588__PHI:11302#InvA__Inva#28901#Salmonella_enterica#reduced_virulence__unaffected_pathogenicity	26	691	21	685	IVLIICILFLPIPTVLLDVGLASSIALSILILMVALWIEKPLEFSSFPTVLLIVTIIRLSLNIATTRAILSFGHEGYGAAGGIIAGFSSLVMSGDFVIGLVVFMILITINFIVITKGATRIAEVGARFTLDAIPGKQMAIDADLSSGLIEEEEAKRRRKELEEESAFFGAMDGASKFVRGDAIASIIITAINIVGGIVIGCFRYDMSIHHAADVFVRLSVGDGLVSQVPALIISLSAAFLVSRTTSKGST-NTAIVEQLSHYPRALLISAFFMIVLSVMPNLPAFPFIMLGGFFACAGFYVPYKNELQRLAKVAQI---QEASKQNQHSAQLNFI-------TSGVELVLGSLVSNRLLSSQEDL--FLRVSKIRRKFAVQYGFIVPEIKVTTDISLPE…	MVMIISMFVIPLPTYLVDFLIALNIVLAILVFMGSFYIDRILSFSTFPAVLLITTLFRLALSISTSRLILI-----EADAGEIIATFGQFVIGDSLAVGFVVFSIVTVVQFIVITKGSERVAEVAARFSLDGMPGKQMSIDADLKAGIIDADAARERRSVLERESQLYGSFDGAMKFIKGDAIAGIIIIFVNFIGGISVGMTRHGMDLSSALSTYTMLTIGDGLVAQIPALLIAISAGFIVTRVNGDSDNMGRNIMTQLLNNPFVLVVTAILTISMGTLPGFPLPVFVILSVVLSVL-FYFKFREAKRSAAKPKTSKGEQPLSIEEKEGSSLGLIGDLDKVSTETVPLIL--LVPK---SRREDLEKAQLAERLRSQFFIDYGVRLPEV-------LLR…	3e-96	313	802	689	32.8	226	416	369	14	47	53.56	44562	1	IM1LM2CSIMLFFVLI1IL2VY1LV1VFGLLI1SLSN1AV1SA2IVLF1VGASLFWY1EDKRPI1ES2ST2TA4VT1ILIF2SA1NS1AS1TS1AL2SIF-G-H-E-G-YEGAAD2GE3GT1SGSQLF1MISGGDDSFLVAIV1LF3MS1LVITTVIVNQ7ASTE1IV3GA3TS2AGIM5AS5SKSA1LI1EDEAEDEA1KRRE2KSEV2ER2AQFLFY1ASMF3SM2VIRK5SG3TIAFIV1IFVI3VSIV1CMFT1YHDG1SDILHSHS1ALDSVTFYVTRM1STVI5SA1VI3IL1SALI2AG1LI1ST1TVTNSGKDGSSDTN-MNGTRAN1VMET2SLHNYN1RFAV1LVIVST1FIFLMT1VSLMSGVTML1NGLF1ALFPPV1IVMI1GSGV…	N/A	N/A	N/A	N/A	N/A	N/A	N/A	N/A	96	96
CLIBASIA_01335	0	CLIBASIA_01335	Q8Y8N0#PHI:6510__PHI:7620#CshA__Lmo0866#1639#Listeria_monocytogenes#unaffected_pathogenicity__increased_virulence_(hypervirulence)	Q8Y8N0#PHI:6510__PHI:7620#CshA__Lmo0866#1639#Listeria_monocytogenes#unaffected_pathogenicity__increased_virulence_(hypervirulence)	0	0	Q8Y8N0#PHI:6510__PHI:7620#CshA__Lmo0866#1639#Listeria_monocytogenes#unaffected_pathogenicity__increased_virulence_(hypervirulence)	Q8Y8N0#PHI:6510__PHI:7620#CshA__Lmo0866#1639#Listeria_monocytogenes#unaffected_pathogenicity__increased_virulence_(hypervirulence)	3	373	4	368	FADLGLSPKVVCAVLDAGYVKPTPIQIKTIPLVLQRHDVCGIAQTGTGKTASFVLPMLTILEKGRARVRMPRTLILEPTRELAAQVADNFEKYGKNYNLTVALLIGGIPFEAQNKKLERGADVLICTPGRILDHFNRGKLLMNNIEILVIDEADRMLDMGFIPYIQNITSLVPFTRQTLLFSATMTDELQKVSENFLQNPKRIEVNTPSSTAETIEHCFVATYAQYSKKCALLQQLLQSQDTMKNGIIFCNQKKNVVNLCHSLEKQGFSVCAIHGNIDQRSRMKILSNFKEGTIQLMVASDLAARGLDIPDVGHVFNFDVPNRAENYIHRIGRTGRAGRHGKAFTLVAKEDIKHIDAIEKLIEKKVDWLNG	FSEFGLDEKIVKSVNRMGFEEATPIQEKTIPLGLEGKDLIGQAQTGTGKTAAFGLPMIHKIDQKSNNVQ---ALIIAPTRELAIQVSEELYKLSYDKHVRVLAVYGGSDISRQIRSLKKNPQIVVGTPGRILDHINRRTLKLDHVETLVLDEADEMLNMGFIDDIETILKEVPAERQTLLFSATMPDPIRRIGERFMHSPELIRIKAKEMTALLIEQFFVKVHEK--EKFDVLSRLLDVQ-APELAIVFGRTKRRVDELSRALDMRGYVAEGIHGDLTQAKRMSVLRKFKEGKIDVLVATDVAARGLDISGVTHVYNYDIPQDPESYVHRIGRTGRAGKEGMAITFVQPREMGYLRIVEETTKKRMQPLQA	3e-95	299	766	371	42.32	157	208	233	3	6	62.8	44562	1	1ASDELF2SDPE1VI1CKAS1LNDRAM1YFVEKEPA4IE5VG1QERGHK1VLCI1IQ9SA1VG3LITHIKLIEDKQGKRSANRN1RQM-P-R-TA2LIEA6AI2ASDENEFLEY1YLGSKYNDYKNHLVTR1ALLALVIY2ISPDFIESAR1NIKRKS1EKRKGNAPDQVILVIVCG8FI2GRKT1LKMLNDNHIV1IT2IL4RE2DN4PDYD1QENT1TLSKLE2FATE10TP1EPLIQRKRVISG1NR1LMQHNS1KERL1ERVINKTAPKSESM2ELTL2HQCF2AKTVYHAEQKY-S-KE1CFADLV1QSQR2QDSV1D-TAMPKENLGA1IV1CGNRQT1KRNR1VDNE1CSHRSA1EDKMQR1FYSVVACEAG3NDILDT1RASK2KSIV1SR…	N/A	N/A	N/A	N/A	N/A	N/A	N/A	N/A	80	80
CLIBASIA_01335	0	CLIBASIA_01335	Q837J2#PHI:11494#CshA_(EF0846)#1351#Enterococcus_faecalis#reduced_virulence	Q837J2#PHI:11494#CshA_(EF0846)#1351#Enterococcus_faecalis#reduced_virulence	0	0	Q837J2#PHI:11494#CshA_(EF0846)#1351#Enterococcus_faecalis#reduced_virulence	Q837J2#PHI:11494#CshA_(EF0846)#1351#Enterococcus_faecalis#reduced_virulence	1	384	22	392	MDFADLGLSPKVVCAVLDAGYVKPTPIQIKTIPLVLQRHDVCGIAQTGTGKTASFVLPMLTILEKGRARVRMPRTLILEPTRELAAQVADNFEKYGKNYNLTVALLIGGIPFEAQNKKLERGADVLICTPGRILDHFNRGKLLMNNIEILVIDEADRMLDMGFIPYIQNITSLVPFTRQTLLFSATMTDELQKVSENFLQNPKRIEVNTPSSTAETIEHCFVATYAQYSKKCALLQQLLQSQDTMKNGIIFCNQKKNVVNLCHSLEKQGFSVCAIHGNIDQRSRMKILSNFKEGTIQLMVASDLAARGLDIPDVGHVFNFDVPNRAENYIHRIGRTGRAGRHGKAFTLVAKEDIKHIDAIEKLIEKKVDWLNGDLSSLNPPLEK	LKFKELGLAPELLSAVERAGFEEATPIQSETIPLALAGKDVIGQAQTGTGKTAAFGLPMLNKID---ADNRVIQGLVIAPTRELAIQTQEELFRLGRDKKIRVQAVYGGADIGRQIRGLKDRPHIVVGTPGRLLDHINRRTLKLETVETLVLDEADEMLNMGFLEDIEKIISQVPEQRQTLLFSATMPPAIKNIGVKFMKQPEHVKIKAKEMTADLIDQYYVRS--KDFEKFDIMTRLLDVQ-TPELTIVFGRTKRRVDELARGLEARGYKAEGIHGDLSQQKRMSVLRSFKNGNLDILVATDVAARGLDISGVTHVYNYDIPQDPESYVHRIGRTGRAGKGGMSVTFVTPNEMGYLHVIENLTKKR-------MTPLRPPTEK	3e-95	300	767	384	40.89	157	214	239	4	13	62.24	44562	1	MLDK1AKDE3SA1KEVLVLCS2LEDR2YFVEKEPA4ISKE4VA1QARGHK2CI1IQ9SA1VG4TNIKLIEDK-G-R-1RDVN1MVPIRQTG1IVLIEA6AI1VTAQDENEFLEFKRYL1KRNDYKNKLITR1AQLALVIY2IAPDFIEGAR1NIKRKG1EKRDGRAPDHVILVIVCG4IL3FI2GRKT1LKMLNENTIV1IT2IL4RE2DN3ILPEYD1QENK1TI1LQ2FETQ10TPDPEALIQKKNVISGEVNK1LMQKNQ1KERHIVEKVINKTAPKSESM2EDTL1EDHQCYFY1ARTSY-A-QKYDSFKE1CFADLILMQTQR2QDSV1D-1MPKENLGT1IV1CGNRQT1KRNR1VDNE1CAHRSG2KAQR1FYSKVACEAG3NDILDS1RQS…	N/A	N/A	N/A	N/A	N/A	N/A	N/A	N/A	83	83
CLIBASIA_04810	0	CLIBASIA_04810	A0A0M2J080#PHI:6894#SufC#28901#Salmonella_enterica#unaffected_pathogenicity	A0A0M2J080#PHI:6894#SufC#28901#Salmonella_enterica#unaffected_pathogenicity	0	0	A0A0M2J080#PHI:6894#SufC#28901#Salmonella_enterica#unaffected_pathogenicity	A0A0M2J080#PHI:6894#SufC#28901#Salmonella_enterica#unaffected_pathogenicity	1	249	1	247	MLEIKNLRAKIVDTDTEIIRGLNLKVEPSEVVAIMGPNGSGKSTLSYLLSGHKDYEITAGDILYKGESILDWSIVERASKGIFLAFQYPVEIPGIIMMQFLKIALNEQRKARNEKELLIPDFTRKVRKITAELGINMDMLKRPLNLGFSGGEKKIAEILQMRLLEPSLCILDETDSGLDIDALKIAAQGVNALRSQDRSFLIITHYQRLLNYIKPDTIHVLHNGKIIKTGDYSIALDLEENGYAELIKE	MLSIKDLQVSV--EEKAILRGLNLEIRPGEVHAIMGPNGSGKSTLSATLAGREDYEVTGGSVTFKGKDLLELSPEERAGEGIFMAFQYPVEIPGVSNQFFLQTALNAVRAYRGQASLDRFDFQDLMEEKIALLKMPEDLLTRSVNVGFSGGEKKRNDILQMAVLEPELCILDESDSGLDIDALKIVAEGVNALRDDKRAFIIVTHYQRILDYIKPDYVHVLYQGRIVRSGDFTLVKQLEEQGYGWLTEQ	3e-94	279	714	249	55.02	137	110	183	1	2	73.49	44562	1	2ES2ND1RQAVKSIVV-D-TEDETKEA1IL5KEVIER1SG2VH14YALT1SA1HRKE3IV1AG1DSIVLTYF2EKSDIL1DEWL1IPVE3SGKE3LM10IVISMNMQQF2KQIT3EAQV1KAAY1NGEQKAES1LDIRPF2TQRDKLVMREKEIKTI1EL1GKIMNPME1ML1KT1PSLV1LV8IRANED4RALV3SE6TS11AV1QE6SDQDDK1SA1LI1IV5LI1ND5TYIV3HYNQ1KR1IVKRTS2YFSTILAVLKDQ3NQ2AGEW1ITKEEQ	N/A	N/A	N/A	N/A	N/A	N/A	N/A	N/A	100	100
CLIBASIA_04810	0	CLIBASIA_04810	A0A0F6B0W5#PHI:10100#STM14_RS07710_(sufC)#28901#Salmonella_enterica#reduced_virulence	A0A0F6B0W5#PHI:10100#STM14_RS07710_(sufC)#28901#Salmonella_enterica#reduced_virulence	0	0	A0A0F6B0W5#PHI:10100#STM14_RS07710_(sufC)#28901#Salmonella_enterica#reduced_virulence	A0A0F6B0W5#PHI:10100#STM14_RS07710_(sufC)#28901#Salmonella_enterica#reduced_virulence	1	249	1	247	MLEIKNLRAKIVDTDTEIIRGLNLKVEPSEVVAIMGPNGSGKSTLSYLLSGHKDYEITAGDILYKGESILDWSIVERASKGIFLAFQYPVEIPGIIMMQFLKIALNEQRKARNEKELLIPDFTRKVRKITAELGINMDMLKRPLNLGFSGGEKKIAEILQMRLLEPSLCILDETDSGLDIDALKIAAQGVNALRSQDRSFLIITHYQRLLNYIKPDTIHVLHNGKIIKTGDYSIALDLEENGYAELIKE	MLSIKDLQVSV--EEKAILRGLNLEIRPGEVHAIMGPNGSGKSTLSATLAGREDYEVTGGSVTFKGKDLLELSPEERAGEGIFMAFQYPVEIPGVSNQFFLQTALNAVRAYRGQASLDRFDFQDLMEEKIALLKMPEDLLTRSVNVGFSGGEKKRNDILQMAVLEPELCILDESDSGLDIDALKIVAEGVNALRDDKRAFIIVTHYQRILDYIKPDYVHVLYQGRIVRSGDFTLVKQLEEQGYGWLTEQ	3e-94	279	714	249	55.02	137	110	183	1	2	73.49	44562	1	2ES2ND1RQAVKSIVV-D-TEDETKEA1IL5KEVIER1SG2VH14YALT1SA1HRKE3IV1AG1DSIVLTYF2EKSDIL1DEWL1IPVE3SGKE3LM10IVISMNMQQF2KQIT3EAQV1KAAY1NGEQKAES1LDIRPF2TQRDKLVMREKEIKTI1EL1GKIMNPME1ML1KT1PSLV1LV8IRANED4RALV3SE6TS11AV1QE6SDQDDK1SA1LI1IV5LI1ND5TYIV3HYNQ1KR1IVKRTS2YFSTILAVLKDQ3NQ2AGEW1ITKEEQ	N/A	N/A	N/A	N/A	N/A	N/A	N/A	N/A	100	100
CLIBASIA_02705	0	CLIBASIA_02705	P0A038#PHI:6904#GAPDH#1280#Staphylococcus_aureus#reduced_virulence	P0A038#PHI:6904#GAPDH#1280#Staphylococcus_aureus#reduced_virulence	0	0	P0A038#PHI:6904#GAPDH#1280#Staphylococcus_aureus#reduced_virulence	P0A038#PHI:6904#GAPDH#1280#Staphylococcus_aureus#reduced_virulence	1	333	1	335	MVCKVAINGFGRIGRCILRAAVESRRDDVRIVAINDLNSIETMAHLLRYDSVHGRFPGEVKIIGDTIDVGLGPIQVTSIRDPQDLPWGD--VDVAMECTGFFVTQEKASLHLSNGSQRVLVSAPCKGVKKTIVYGVNHQSLNKEDKVVSNASCTTNCLVPVVHVLDKMFGIEKGYMTTVHSYTGDQHVLDAGH--SDLYRSRAAAISMVPTSTGAAKAVELVLPNLKGKLDGSSIRVPTPNVSMVDLKCVTSR-DVNIDEINATMKYFAEGDLKNILGYVTLPLVSVDFNHTSYSSIFAADQTKVVS---QNLLRVLVWYDNEWGFSNRMLDTASAMANLS	MAVKVAINGFGRIGRLAFRRIQEV--EGLEVVAVNDLTDDDMLAHLLKYDTMQGRFTGEVEVVDGGFRVNGKEVKSFSEPDASKLPWKDLNIDVVLECTGFYTDKDKAQAHIEAGAKKVLISAPATGDLKTIVFNTNHQELDGSETVVSGASCTTNSLAPVAKVLNDDFGLVEGLMTTIHAYTGDQNTQDAPHRKGDKRRARAAAENIIPNSTGAAKAIGKVIPEIDGKLDGGAQRVPVATGSLTELTVVLEKQDVTVEQVNEAMKNAS----NESFGYTEDEIVSSDVVGMTYGSLFDATQTRVMSVGDRQLVKVAAWYDNEMSYTAQLVRTLAYLAELS	2e-93	283	725	341	43.7	149	178	213	6	14	62.46	44562	1	1VACV12CLIALF1ARAIVQ1SVR-R-DEDGVLREIV2IV3NTSDIDEDTMML4RK2STVMHQ3PT3KEIVIVGDDGTGIFDR1GNLGGKPEIVQKVSTF1IERP1PAQSDK3GK1-L-NVI2AVML5FYVTTDQKED2SQLA1LISENA1SAQKRK2VI3CAKT1VDKL4YFGNVT3SE1NDKGESDEKT3NG6CS1VA2VAHK2DNKDMD2ILEVKE1YL3VI1SA5HNVTLQ2GP1-R-KSG1LKYR1SA4IESNMIVI1TN7VIEGLK1LI1NELIKD5SGSAIQ3TVPANTVG1MLVTDE1KTCV1TLSERK-Q2NTIVDEEQIV1AETA2YNFAASE-G-D-L-KNNEISLF2VTTELDPELI2VS1FVNVHGTMST1SG1IL1AD1DT2KR1…	N/A	N/A	N/A	N/A	N/A	N/A	N/A	N/A	100	100
CLIBASIA_03930	0	CLIBASIA_03930	G4N6P6#PHI:8695#MoImd4_(MGG_03699)#318829#Magnaporthe_oryzae#reduced_virulence	G4N6P6#PHI:8695#MoImd4_(MGG_03699)#318829#Magnaporthe_oryzae#reduced_virulence	0	0	G4N6P6#PHI:8695#MoImd4_(MGG_03699)#318829#Magnaporthe_oryzae#reduced_virulence	G4N6P6#PHI:8695#MoImd4_(MGG_03699)#318829#Magnaporthe_oryzae#reduced_virulence	1	460	37	510	MARIIENNVGGVALTFDDVLLRPEFSNVLPRDIDISTRIAKDFTLNLPIMSAAMDQVTDSRLAIAMAQAGGLGVIHRNFSPSEQVAQVHQVKKFESGMVVNPVTISPYATLADALALMKKYSISGIPVVES-DVG-KLVGILTNRDVRFASNAQQAVGELMTRNLITVKKTVNLENAKALLHQHRIEKLLVVDDDGCCIGLITVKDIERSQLNPNATK--DSKGRLRVAAAVSVAKDIADRVGPLFDVNVDLVVVDTAHGHSQKVLDAVVQIKKNFPSLLVMAGNIATAEGALALIDAGADIIKVGIGPGSICTTRVVTGVGCPQLSAIMSVVEVAERAGVAIVADGGIRFSGDIAKAIAAGSACVMIGSLLAGTDESPGDIFL-YQGRSFKSYRGMGS…	ITQLLDSKTNG-GLTYNDFLLLPGYIGFPASEVALDSPVTKRISLKTPFVSSPMDTVTEHEMAIHMALQGGLGVIHHNCSAEEQADMVRKVKRYENGFILDPVVISRDTTVGEAKALKEKWGFGGFPVTETGKIGSKLLGIVTNRDIQFEDDVNTKVADVMVTDLITAPSGVTLAEANKILAKSKKGKLPIVDQDFNLVSMISRSDLNKNLYFPLASKLPDSK-QLLCAAAIGTRPEDKVRLQKLVDAGLDVVILDSSQGNSIYQIEMIKWIKGNFPGLDVIGGNVVTREQAAALIAAGVDGLRIGMGSGSACITQEVMAVGRPQATAVHSVSAFAARFGVPCIADGGIQNVGHIVKGLALGASTVMMGGLLAGTTESPGTSFVSREGKLVKAYRGMGS…	2e-93	296	757	479	37.16	178	277	278	8	24	58.04	44562	1	MIATRQILILEDNSNKVTGN1V-AG2FYDN1VF2RL1EGFYSINGVFLPPARSDEIVDAILSDTSRPIVAT1DRFITS1NKLT1IFMV1ASAP2QT2DESHRELM2AH2QLAQ7RH1FC1PASE2VAADQM1HRQK2KRFY1SN1MFVIVLND2TV2PRYDAT1LVAGDE1LK2MKKE1YWSGIFSG1IF2VT1ST-GDKVI1-S2VL2LV4VIRQ1AESDNDAVQNQTAK1GAEDLV1TVRTND3VAKPKSTG1NT1EANE1KNAKLI1HAQKHSRKIKEG2LPVI2DQ1GFCNCLIVGSLM1TSVRKS1ILENRKSNQLLYNF1NL1TS1-L-P3G-RQ1RLVC3VISGVTARKPDEIDAKDV1VLGQPK1FV1VANGVL1LV1VIVL1TSASHQ1H…	N/A	N/A	N/A	N/A	N/A	N/A	N/A	N/A	93	93
CLIBASIA_03930	0	CLIBASIA_03930	A0A0A2HZI5#PHI:8720#PeImp#27334#Penicillium_expansum#unaffected_pathogenicity	A0A0A2HZI5#PHI:8720#PeImp#27334#Penicillium_expansum#unaffected_pathogenicity	0	0	A0A0A2HZI5#PHI:8720#PeImp#27334#Penicillium_expansum#unaffected_pathogenicity	A0A0A2HZI5#PHI:8720#PeImp#27334#Penicillium_expansum#unaffected_pathogenicity	13	490	36	526	ALTFDDVLLRPEFSNVLPRDIDISTRIAKDFTLNLPIMSAAMDQVTDSRLAIAMAQAGGLGVIHRNFSPSEQVAQVHQVKKFESGMVVNPVTISPYATLADALALMKKYSISGIPVVESDV--GKLVGILTNRDVRFASNAQQAVGELMTRNLITVKKTVNLENAKALLHQHRIEKLLVVDDDGCCIGLITVKDIERSQLNPNATKDSKGRLRVAAAVSVAKDIADRVGPLFDVNVDLVVVDTAHGHSQKVLDAVVQIKKNFPSLLVMAGNIATAEGALALIDAGADIIKVGIGPGSICTTRVVTGVGCPQLSAIMSVVEVAERAGVAIVADGGIRFSGDIAKAIAAGSACVMIGSLLAGTDESPGDIFL-YQGRSFKSYRGMGSVAAMERGS------…	ALTYNDFLILPGSITFPASDVTLETKVTRRFTIKAPLLSSPMDTVTEHNMAIHMALLGGLGVIHNNCPPDEQAEMVRKVKRYENGFIQDPIVLSPETTVAEAKELKMKWGFGGFPVTEKGTLHSKLLGIVTSRDIQFHRNPEDPVTAVMATDLVTAPAGTTLAEANEVLRSSKKGKLPIVDNHGSLISLLSRSDLMKNIHYPLASKLPSKQLLCAAAISTHDADKVRLQKLVDAGLDIVVVDSSQGHSKFQIAMIKYIKQTFPDIDVIAGNIVTREQAAALIAAGADGLRIGMGSGSACITQEVMAAGRPQAAAVRSVSAFASRFGVPTIADGGVQNLGHIVKGLALGASAVMMGSLLAGTTESPGEYFMSSEGQLVKAFRGMGSIAVMEDKSKSAGGN…	2e-93	295	755	495	37.37	185	289	282	7	21	56.97	44562	1	3FYDN1VF1LIRL1EGFSSINTVFLPPARS1IVDTILSE1RKIVATKRDR2LINKLA1ILML1ASAP2QT2DESHRNLM2AH2QLAL7RN1FCSP1SD2VAAEQM1HRQK2KRFY1SN1MFVIVQND1VITVIL2YEAT1LV1DE1LKAE1MKKM1YWSGIFSG1IF2VT1SKDGVT-L-HGS2VL2LV1NS2VIRQ1AHSR1APQEQDAP1GTEALV1TARTND1IV1VAKPKATGVTNT1EANE1KNAELV1HRQSHSRKIKEG2LPVI2DNDH1CSCL1GS1ILTSVRKS1ILEMRKSNQILHNY1NL1TS1DLSPKSGKRQ1RLVC3VI1VTAHKDDAIDAKDV1VLGQPK1FV1VANGVL1LI4TSASHQ3QKKFVQLIDAAMVIVKQY2KQNT…	N/A	N/A	N/A	N/A	N/A	N/A	N/A	N/A	97	97
CLIBASIA_00785	0	CLIBASIA_00785	Q8PBY6#PHI:10726#ClpP#339#Xanthomonas_campestris#reduced_virulence	Q8PBY6#PHI:10726#ClpP#339#Xanthomonas_campestris#reduced_virulence	0	0	Q8PBY6#PHI:10726#ClpP#339#Xanthomonas_campestris#reduced_virulence	Q8PBY6#PHI:10726#ClpP#339#Xanthomonas_campestris#reduced_virulence	16	208	8	200	LGLVPMVVEQTNRGERSYDIYSRLLKERIVFVTGQIEDHMATLICAQLLFLEAENPQKEISLYINSPGGVVTAGMAIYDTMQFIKPPISTFCMGQAASMGSLLLSAGEKGMRFALPNARILLHQPSGGFSGQASDIERHAQDIVKIKRRLNEIYVKNCGKTYEEVEKTLDRDHIMSASEACDWGVVDKVLMSR	LNLVPMVVEQTSRGERAYDIYSRLLKERLIFLVGPIDDHMANVIVAQLLFLEADNPEKDISIYINSPGGVVTAGMAIYDTMQYIKPDVSTICVGQAASMGALLLASGAAGKRYALPNSRVMIHQPLGGFQGQATDIDIHAREILTLRSRLNEILAKHTGQSLETIARDTERDNFKSAVDAQAYGLVDHVLERR	3e-93	274	700	193	63.73	123	70	162	0	0	83.94	44562	1	1GN9NS4SA11ILVI1VLTV1QP1ED4TNLV1CV8ED2QE1ED2LI20FY3PDIV2FI1MV7SA3SAAS1EAKA1MK1FY4AS1IVLMLI3SL3SQ3ST2EDRI2QRDE1VLKTILKRRS5YLVA1NHCT1KQTSYL1ETVIEAKRTDLTDE2HNIFMK2SVED1CQDAWY1VL2KH2MESR1	N/A	N/A	N/A	N/A	N/A	N/A	N/A	N/A	89	89
CLIBASIA_05100	0	CLIBASIA_05100	A0QHC4#PHI:7990#LysX#1764#Mycobacterium_avium#increased_virulence_(hypervirulence)	A0QHC4#PHI:7990#LysX#1764#Mycobacterium_avium#increased_virulence_(hypervirulence)	0	0	A0QHC4#PHI:7990#LysX#1764#Mycobacterium_avium#increased_virulence_(hypervirulence)	A0QHC4#PHI:7990#LysX#1764#Mycobacterium_avium#increased_virulence_(hypervirulence)	15	490	698	1172	IEVRSQKLNMLRKSLAEVYPAHFHRDITNAEVREKYSHLQNDEKSQDMITVAGRVYSSRNSG--MFMDIHDASGKIQIFTHKDTADQD-SQNLLSMIDIGDIIGITGQVRRTKRGELTVNAQKIIMLSKALNSIPETYYGLSDVEIRYRKRYLDIISNSDSKIRFQQRSLLISQIRHFMEKKGFMEVETPILQPIYGGATADPFKTHHNILKADMYLRIAPELYLKRVLISGLTDQVFELNRNFRNEGVSSRHNPEFTMIEAYWAYTDYRDMMKLVEDLCHNLAKTLHGTTDI--PFGE---KVISFKAPFACKSMLQLVKEATG--LDFMLLKSDQEARVAAQSIGITVENDALWGEVMMTIFEEKIEKNIVNPTHITDFPKDISPFAKEVAGEKRLV…	VRVRLAKLKVLQRNGVDAYPVGCPPSHTVAQAL--------DADDQQDITVAGRILRIRDFGGVLFAQLRDWSGEMQVLLDNSRLERGRTADFTAAIDLGDLVEVSGQMGFSKKGTRSLIVTDWRMIGKCLRPLPNKWKGLTDPEARVRTRYVDLAVNPESRELIAARSEVLRSVRQTLFAKGFIEVETPILQQIHGGATARPFVTHINTYDMDLFLRIAPELYLKRLCVGGV-ERVFELGRAFRNEGVDFSHNPEFTLLEAYQAHADYRVWIDGCRELIQNAAQAAHGEQTVLRPGADGRLQPVDISGIWAVKTVHDAVSEALGEQVDPGTSLSTLRKLSDAARIPYRAHWDA--GAVVLELYEHLVEDRTEEPTFYVDFPTSVSPLTRPHRSRPGVA…	4e-93	308	788	487	37.58	183	281	268	10	23	55.03	44562	1	IVER2SLQA2NKMV1RQKRSNLGAVEDVA2AVHGFCHPRPDSIH1NV1EQVARLE-K-Y-S-H-L-Q-N-1EAKDSD1DQMD6VIYLSRSI1NDSF1-G-VML1MADQILHR1AW2KEIM1IVFLTLHDKNDSTRALDEQRDG-RSTQANDLFLTSAMA2IL2ILIVGEIVTS2VMRGRFTS1RK1ETLRTSVLNIAVQTKDIWIR1LISG1AC1NRSPIL1ENTKYWYK2ST1VP1IA1YV1KT2LV1ILIASV1SPDE1KRIERLFIQAQA2LELVILSRQSIV1HQFTMLEFKA3MI8PQ1YH5DR2KV2HI1ITLYKDAM1MLYF11VLLCIVSG1LVT-DEQR4NG1NA6SDSFRS6MLIL3WQ1YHTA3DVMWMIKDLGVCERDE1CIHQ1LA…	N/A	N/A	N/A	N/A	N/A	N/A	N/A	N/A	95	95
CLIBASIA_05100	0	CLIBASIA_05100	A0A5A4WCC8#PHI:9933#LysX#1764#Mycobacterium_avium#increased_virulence_(hypervirulence)	A0A5A4WCC8#PHI:9933#LysX#1764#Mycobacterium_avium#increased_virulence_(hypervirulence)	0	0	A0A5A4WCC8#PHI:9933#LysX#1764#Mycobacterium_avium#increased_virulence_(hypervirulence)	A0A5A4WCC8#PHI:9933#LysX#1764#Mycobacterium_avium#increased_virulence_(hypervirulence)	15	490	606	1080	IEVRSQKLNMLRKSLAEVYPAHFHRDITNAEVREKYSHLQNDEKSQDMITVAGRVYSSRNSG--MFMDIHDASGKIQIFTHKDTADQD-SQNLLSMIDIGDIIGITGQVRRTKRGELTVNAQKIIMLSKALNSIPETYYGLSDVEIRYRKRYLDIISNSDSKIRFQQRSLLISQIRHFMEKKGFMEVETPILQPIYGGATADPFKTHHNILKADMYLRIAPELYLKRVLISGLTDQVFELNRNFRNEGVSSRHNPEFTMIEAYWAYTDYRDMMKLVEDLCHNLAKTLHGTTDI--PFGE---KVISFKAPFACKSMLQLVKEATG--LDFMLLKSDQEARVAAQSIGITVENDALWGEVMMTIFEEKIEKNIVNPTHITDFPKDISPFAKEVAGEKRLV…	VRVRLAKLKVLQRNGVDAYPVGCPPSHTVAQAL--------DADDQQDITVAGRILRIRDFGGVLFAQLRDWSGEMQVLLDNSRLGRGRTADFTAAIDLGDLVEVSGQMGFSKKGTRSLIVTDWRMIGKCLRPLPNKWKGLTDPEARVRTRYVDLAVNPESRELIAARSEVLRSVRQTLFAKGFIEVETPILQQIHGGATARPFVTHINTYDMDLFLRIAPELYLKRLCVGGV-ERVFELGRAFRNEGVDFSHNPEFTLLEAYQAHADYRVWIDGCRELIQNAAQAAHGEQTVLRPGADGRLQPVDISGIWAVKTVHDAVSEALGEQVDPGTSLSTLRKLSDAARIPYRAHWDA--GAVVLELYEHLVEDRTEEPTFYVDFPTSVSPLTRPHRSRPGVA…	7e-93	306	784	487	37.58	183	281	267	10	23	54.83	44562	1	IVER2SLQA2NKMV1RQKRSNLGAVEDVA2AVHGFCHPRPDSIH1NV1EQVARLE-K-Y-S-H-L-Q-N-1EAKDSD1DQMD6VIYLSRSI1NDSF1-G-VML1MADQILHR1AW2KEIM1IVFLTLHDKNDSTRALDGQRDG-RSTQANDLFLTSAMA2IL2ILIVGEIVTS2VMRGRFTS1RK1ETLRTSVLNIAVQTKDIWIR1LISG1AC1NRSPIL1ENTKYWYK2ST1VP1IA1YV1KT2LV1ILIASV1SPDE1KRIERLFIQAQA2LELVILSRQSIV1HQFTMLEFKA3MI8PQ1YH5DR2KV2HI1ITLYKDAM1MLYF11VLLCIVSG1LVT-DEQR4NG1NA6SDSFRS6MLIL3WQ1YHTA3DVMWMIKDLGVCERDE1CIHQ1LA…	N/A	N/A	N/A	N/A	N/A	N/A	N/A	N/A	95	95
CLIBASIA_02970	0	CLIBASIA_02970	A0A385EXL2#PHI:10561#PstS#470#Acinetobacter_baumannii#reduced_virulence__increased_virulence_(hypervirulence)	A0A385EXL2#PHI:10561#PstS#470#Acinetobacter_baumannii#reduced_virulence__increased_virulence_(hypervirulence)	0	0	A0A385EXL2#PHI:10561#PstS#470#Acinetobacter_baumannii#reduced_virulence__increased_virulence_(hypervirulence)	A0A385EXL2#PHI:10561#PstS#470#Acinetobacter_baumannii#reduced_virulence__increased_virulence_(hypervirulence)	25	345	27	341	RNRIRIAGSSTLFPYSKIIAENFSEYFPEFKTPFVESGGSSVGLKEFCRGIGDDTIDIVNSSRKITQNELDECKKHGVSDIQEVTIGHDGILLVSDRDMVSVSLTVEDLYKALASYLIVDDKVVFNPLKKWSEIRPDFPEVRIAIYVPSGKHGTREVLEKKVLQEGCVRSRNFSKM-RDMFKYNVQQLSVACTSVRQDGIAIEVDGDYTETLARIEVNKDVFGFVGLSFYKNNADVLKLVPIDGIVPSMGTIVSGLYPISRPLLFYVKRQHFNSVLGLREYVSFSVSDEMMAPDSQLFQYGLIPISNEERKSVRDSIAVGKS	RDTIQIAGSSTVLPFASVVAEEFGNTFPQFKTPVVGSGGSSAGLKQFCQGVGDNTIDVANASRKIKSTEIEACNKAGVKQIQEIKIGYDGIVFASSSSKAAYKLKPYHVFAALAAQLPSKGKLVPNPYTNWNQIDKSLPNEPITLVIPASNHGTREVFQEKMVEAGCEAYEYFKSLDKDAQKK-------ACSTFRKDGRVIEIAGDYTETLARLKTSPSAVGVFGLSFYDMNRDKLRVATVNNVVPSEKTVLNGTYPVSRPLYFYVKGEHLKSVKGLPQYVEYFLSKKATGKGSKAERDGLIAMSDAERAKVLADFKAGKT	9e-93	283	723	322	42.86	138	176	200	2	8	62.11	44562	1	1NDRT1RQ6LVFL1YFSAKSIVIV2NE1SGENYT2EQ4FV1EG5VA3EQ2RQ1IV2DN3IVVA1SA4TKQSNT1LIDEEA1KN1HA2SKDQ3VITK2HY3LVLFVA1DSRSDSMKVASAVYSK1TKVPEYDHLVYFKA3SAYQ1IPVSDKDG1VL1FP2LYKTKN1SNEQ1RDPKDSFL1ENVERP1ATILYVVI1SAGSKN6LFEQKE1VMLVQEEA2VERASYRENY1SKKSML-DRK1MAFQ1YKN-V-Q-Q-L-S-V-2TSSTVF1QK2IRAV2VIDA9ILEKVTNSKPDSVAFV1FVVF5KDNM1AR1VK1KRLVVAPTIVDNGNIV3MEGK1IVVLSN1LT2IV4LY4RGQE1FLNK2LK2RPEQ2SEFYSFVL1DKEKMAMTAGPKDG1QKL…	N/A	N/A	N/A	N/A	N/A	N/A	N/A	N/A	93	93
CLIBASIA_01105	0	CLIBASIA_01105	E0SL85#PHI:8573#PurF_(Dda3937_02099)#204038#Dickeya_dadantii#reduced_virulence	E0SL85#PHI:8573#PurF_(Dda3937_02099)#204038#Dickeya_dadantii#reduced_virulence	0	0	E0SL85#PHI:8573#PurF_(Dda3937_02099)#204038#Dickeya_dadantii#reduced_virulence	E0SL85#PHI:8573#PurF_(Dda3937_02099)#204038#Dickeya_dadantii#reduced_virulence	15	473	2	473	CGVFGILGHPDAATLTAIGLHALQHRGQEATGIISFN-GNKFHSERHLGLVGDHFTKPETLSLLPGNMAIGHVRYSTTGDQIIRNVQPLFADLQVGGIAIAHNGNFTNGLTLRKKLISSGAI-FQSTSDTEVILHLIARSQKNGSCDRF------IDSL--------RHVQGAYAMLALTRTK-LIATRDPIGIRPLIMGELH-----GKPIFCSETCALEITGAKYIRDVENGETIVCELQEDG-FISIDSYKNPSTSPERMCIFEYVYFARPDSIISGRSIYVSRRNMGKNLAKE-----SPVIADIVVPIPDGGVPAAIGYAKESGIPFEQGIIRNHYVGRTFIEPSHHIRAFGVKLKHSANRTILAGKRVVLIDDSIVRGTTSVKIVQMIRSAGA…	CGIVGIAGFTPVNQSIYDALTVLQHRGQDAAGIVTINDANYFRLRKANGLVKDVF-EARHMQRLQGNMGIGHVRYPTAGSSSASEAQPFYVNSPFG-ITLAHNGNLTNAHELRKKLFEEGRRHVNTTSDSEILLNVFAKE-----LDRFQHYPLEADNIFAAVAAVHQQIRGAYACIGMIIGHGMVAFRDPNGIRPLVIGKRELPDGRNEYIVASESVALDTLGFEFLRDVAPGEAVY--ITENGQLFTRQCAENPKSHP---CLFEYVYFARPDSFIDKISVYSARVRMGQKLGEKIARQWEELDIDVVIPIPETSCDIALEIARIINKPYRQGFVKNRYVGRTFIMPGQQTRIKSVRRKLNANRAEFRGKNVLLVDDSIVRGTTSQQIVEMAREAGA…	9e-92	290	743	487	38.19	186	258	264	15	43	54.21	44562	1	2VIFV2LA1HFPTDPAVANTQLSTIAYIDGA1HTAV6ED1TA2IVSTFI1-DGA1KY1HRSLERRKHALN3GK1HV1T-KEPAERTHLMSQLR1PQ3AG6SP1TA1DSQSISIARSNEVA2LFFYAVDNLSQPVF1G-1ATIL5FL2GALHTE5IFSESE1ARIR-HFVQNST3TS1VIIL1HNLVIF1RKSEQ-K-N-G-S-CL3-Q-H-Y-P-L-EIA1SNLI-F-A-A-V-A-A-V-HRQHQVIQR4MCLIAGLMTIRITGKH-GLMIV1TF3IN5IVMI1EKLRHE-L-P-D-G-RGNKEPY1FVCA2TSCV2EDITTL1AFKEYFIL3EANP2TAIVVYC-E-LIQT1DN1-QFLIFSTIRDQSCYAKE2SKTSSH1E-R-M-1IL11IF1SDG…	N/A	N/A	N/A	N/A	N/A	N/A	N/A	N/A	94	94
CLIBASIA_01105	0	CLIBASIA_01105	D4HXG4#PHI:9317#PurF#552#Erwinia_amylovora#reduced_virulence	D4HXG4#PHI:9317#PurF#552#Erwinia_amylovora#reduced_virulence	0	0	D4HXG4#PHI:9317#PurF#552#Erwinia_amylovora#reduced_virulence	D4HXG4#PHI:9317#PurF#552#Erwinia_amylovora#reduced_virulence	15	474	2	474	CGVFGILGHPDAATLTAIGLHALQHRGQEATGIISFNG-NKFHSERHLGLVGDHFTKPETLSLLPGNMAIGHVRYSTTGDQIIRNVQPLFADLQVGGIAIAHNGNFTNGLTLRKKLISSGAI-FQSTSDTEVILHLIARSQKNGSCDRF------IDSL--------RHVQGAYAMLALTRTK-LIATRDPIGIRPLIMGE---LHGKP--IFCSETCALEITGAKYIRDVENGETIVCELQEDGFISIDSYKNPSTSPERMCIFEYVYFARPDSIISGRSIYVSRRNMGKNL----AKESPVI-ADIVVPIPDGGVPAAIGYAKESGIPFEQGIIRNHYVGRTFIEPSHHIRAFGVKLKHSANRTILAGKRVVLIDDSIVRGTTSVKIVQMIRSAGAS…	CGIVGIAGFMPVNQSIYDALTVLQHRGQDAAGIVTIDALNCFRLRKANGLVSDVF-EARHMQRMQGNMGIGHVRYPTAGSSSASEAQPFYVNSPYG-ITLAHNGNLTNAHELRKALFETGRRHVNTTSDSEILLNIFAQE-----VDRFQQYPLEADNIFAAIAAVHQKVRGAYACVAMIIGHGLVAFRDPNGIRPLVIGKRPMVDGRTEYMVASESVALDTLGFEFLRDVAPGEAVYV-TEKGQLFTRQCAENPKCNP---CLFEYVYFARPDSFLDKISVYSARVRMGTKLGAKIAREWEDLDIDVVIPIPETSCDIALEMARILDKPYRQGFVKNRYVGRTFIMPGQHLRRSAVRRKLNANRAEFRGKNVLLVDDSIVRGTTSEQIIEMAREAGAK…	1e-91	290	742	487	38.19	186	260	268	16	41	55.03	44562	1	2VIFV2LA1HFPMDPAVANTQLSTIAYIDGA1HTAV6ED1TA2IVSTFINDGA-L1KC1HRSLERRKHALN3GS1HV1T-KEPAERTHLMSQLRLMPQ3AG6SP1TA1DSQSISIARSNEVA2LFFYAVDNLSQPVY1G-1ATIL5FL2GALHTE3KA1IFSEST1ARIR-HFVQNST3TS1VIIL1HNLIIF1RQSEQ-K-N-G-S-CV3-Q-Q-Y-P-L-EIA1SNLI-F-A-A-I-A-A-V-HRQHK1QR4MCLV1LMTIRITGKH-G1IV1TF3IN5IVMI1EK-R-P-MLVHD1KRPT-E-YIMFVCA2TSCV2EDITTL1AFKEYFIL3EANP2TAIVVYCVE-LTQEEKDGGQFLIFSTIRDQSCYAKE2SKTCSN1E-R-M-1IL11IFIL…	N/A	N/A	N/A	N/A	N/A	N/A	N/A	N/A	94	94
CLIBASIA_02120	0	CLIBASIA_02120	A0A0F6B5S8#PHI:10082#STM14_RS15345#28901#Salmonella_enterica#unaffected_pathogenicity	A0A0F6B5S8#PHI:10082#STM14_RS15345#28901#Salmonella_enterica#unaffected_pathogenicity	0	0	A0A0F6B5S8#PHI:10082#STM14_RS15345#28901#Salmonella_enterica#unaffected_pathogenicity	A0A0F6B5S8#PHI:10082#STM14_RS15345#28901#Salmonella_enterica#unaffected_pathogenicity	5	293	11	297	FICLLFSYIPMSASATTQKKVVLSSFSIIGDITQNIAKDLVTVTTLVEAGNDSHSYQVTSADAIKIQNADLILCNGLHLEETYMKYFTNLKKGTKIITVTDGINPIGVSEDTSVDSEPNPHAWMSLTNAMIYIENIRKALTALDPSNAKKYELNAREYSEKIRNSILPLKTRIEKVDPEKRWFVTSEGCLVYLAEDFGFKSLYLWPINSDSERSPSMMRHAINQMRSHKIKFIFSESTNSDQPAKQVAYETNASYGGVLYVDSLSKPDGPAPTYLDLLRFSLTKIVDTL	LIAGIVAILALSPAYAKEKFKVITTFTVIADMAKNVAGDAAEVSSITKPGAEIHEYQPTPGDIKRAQGAQLILANGLNLERWFARFYQHLS-GVPEVVVSTGVKPMGITEG-PYNGKPNPHAWMSAENALIYVDNIRDALVKYDPDNAQIYKQNAERYKAKIRQMADPLRAELEKIPADQRWLVTSEGAFSYLARDNDMKELYLWPINADQQGTPKQVRKVIDTIKKHHIPAIFSESTVSDKPARQVARESGAHYGGVLYVDSLSAADGPVPTYLDLLRVTTETIVNGI	2e-91	276	705	289	44.98	130	157	187	2	2	64.71	44562	1	FL1CALGLIFVSAYIILPAML1APSAAYTATKQE1KFVK1LISTST1STIV1GA1IMTAQK1IV1KG1LAVATE1TSTSLIVTEKAP1NADESI1SE2VP1SPAG1AIIKKRIA1NG1DQ3CA3HN2ERTWYFMAKRYFFYTQNH1KSK-1TVKPIEIVTV1TSDT1IVNK1IM1VIST1DGT-SPVYDNSGEK8LATE2ML2IVED3KD2TVAKLY2SD2KQKI1EKLQ2REER1SKEA3NQSMIALD2KRTAREIL2VIDPPAEDKQ2FL5CALFVS3ER1FNGDFM1SE7SA1SQEQRGST1SKMQMV1HKAV1NDQTMIRKSK1KH1KPFA6NV2QK2KR3YR1TSNG1SH11KAPA3AV8FVSTLTTEKT2DNTGLI	N/A	N/A	N/A	N/A	N/A	N/A	N/A	N/A	98	98
CLIBASIA_01335	0	CLIBASIA_01335	Q9HX66#PHI:11622__PHI:11623#RhlE1_(PA3950)__RhlE2_(PA0428)#287#Pseudomonas_aeruginosa#reduced_virulence	Q9HX66#PHI:11622__PHI:11623#RhlE1_(PA3950)__RhlE2_(PA0428)#287#Pseudomonas_aeruginosa#reduced_virulence	0	0	Q9HX66#PHI:11622__PHI:11623#RhlE1_(PA3950)__RhlE2_(PA0428)#287#Pseudomonas_aeruginosa#reduced_virulence	Q9HX66#PHI:11622__PHI:11623#RhlE1_(PA3950)__RhlE2_(PA0428)#287#Pseudomonas_aeruginosa#reduced_virulence	1	364	1	363	MDFADLGLSPKVVCAVLDAGYVKPTPIQIKTIPLVLQRHDVCGIAQTGTGKTASFVLPMLT--ILEKGRARVRMPRTLILEPTRELAAQVADNFEKYGKNYNLTVALLIGGIPFEAQNKKLERGADVLICTPGRILDHFNRGKLLMNNIEILVIDEADRMLDMGFIPYIQNITSLVPFTRQTLLFSATMTDELQKVSENFLQNPKRIEVNTPSSTAETIEHCFVATYAQYSKKCALLQQLLQSQDTMKNGIIFCNQKKNVVNLCHSLEKQGFSVCAIHGNIDQRSRMKILSNFKEGTIQLMVASDLAARGLDIPDVGHVFNFDVPNRAENYIHRIGRTGRAGRHGKAFTLVAKEDIKHIDAIEKLI	MTFASLGLLDPLLKALEGLGHGTPTPIQAQAIPPALKGRDLLAAAQTGTGKTAGFALPLLQRLTLEGPQVAANSVRALVLVPTRELAEQVHASVRDYGQHLPLRTAVAYGGVSINPQMMKLRKGVDILVATPGRLLDLYRQNAVKFAQLQALVLDEADRMLDLGFARELDELFAALPRKRQTLLFSATFSDAIRTLARELLRDPLSIEVSPRNTAAKSVRQWLVPV--DKKRKAELFCHLLQA-NRWRQALVFAKTRKSVEELVGLLQRQGIAADSIHGDKPQPARLRALQRFKAGEVDLLVATDVAARGLDIEEMPLVVNFDLPIVAEDYVHRIGRTGRAGASGQAVSLVCADEVELLAAIETLI	1e-90	285	728	366	40.98	150	211	225	3	5	61.48	44562	1	1DT2DS3SLPDKPVLVLCK1VLLEDGAL1YHVGKT5IAKQTA2LPVA1QKRGHR1VLCLGAIA9SG1VA2ML1TQ-R-LIT2KGGPRQAVRAVARNMSPV1TA1IV1EV6AE2AHDANSFVERKD2KQNHYLNP1TRVT1LVLAIY2IVPSFIENAP1NMKM2ERRK1AV1VI1IVCA4IL2HLFYNRRQGNKALVLKMFNANQILEQIA2IL8ML2IAPRYEILQDNEILTFSALAVL1FRTK9MFTS1EALIQRKTVLSAERNEFL1QRND1KLRS3NSTPPRSNSTTA1EKTSIVERHQCWFL1APTVY-A-QDYKSKKR1CAAE1LFQCQH3SAQ-DNTRMWKRNQGAILIV1CANKQTKR1NS1VENE1CVHGSL1EQKR2FISAVACDAS3ND…	N/A	N/A	N/A	N/A	N/A	N/A	N/A	N/A	78	78
CLIBASIA_02125	0	CLIBASIA_02125	A0A0F6B5S9#PHI:10083#STM14_RS15350#28901#Salmonella_enterica#unaffected_pathogenicity	A0A0F6B5S9#PHI:10083#STM14_RS15350#28901#Salmonella_enterica#unaffected_pathogenicity	0	0	A0A0F6B5S9#PHI:10083#STM14_RS15350#28901#Salmonella_enterica#unaffected_pathogenicity	A0A0F6B5S9#PHI:10083#STM14_RS15350#28901#Salmonella_enterica#unaffected_pathogenicity	8	243	2	237	TKGGLELKDISVTYPNGYCALEDVNLFIPENTITALIGLNGAGKSTLFQAIMGLIPLDKGSISIFNQTVENALKADLIAYIPQTESIDWTFPILVEDVVMMGRYKHMNWRRVASNNDYRIVTEALENVGMSSMRQRQIGELSIGQQKRVFLARALAQKSQVIIMDEPFAAIDFKTEREMIFLLKSLLNEDIMILVSTHNINSIPSFCDRTIFLKKTVLASGLTSDIFNEDNIQKTF	SQSAITVDQVTVTYRNGHTALRDATFQVPGGSIAALVGVNGSGKSTLFKALMGFVHLAQGDITILQQSVNKALKKNLIAYVPQSEEVDWSFPVLVEDVVMMGRYGHMGWLRRPTAHDHACVDAALARVDMQEYRHRQIGELSGGQKKRVFLARAIAQDGQVILLDEPFTGVDVKTEARIIDLLRELRDEGRTMLVSTHNLGSVTEFCDYTVMIKGTVLASGPTETTFTAANLEQAF	2e-90	271	694	236	52.12	123	113	166	0	0	70.34	44562	1	TSKQGSGALIETLVKDDQIVST3PR2YHCT2ER1VANTLFFQIV1EGNGTS1TA2IV1LV2AS6QK1IL2LFIVPH1DAKQ1SD1ST1FLNQ1TS1ENNK3AKDN4IV2TS1SEIV2TS2IV11KG2NG1RL1VRAPSTNANH1YHRAIC1TDEA2EANR1GD1SQSEMY1QH7IG2QK8LI2KDSG3ILML4ATAGIV1FV3RAERMI1FD2KRSE1LRND1DGIRMTIM6ILNG1IVPTSE3RY1IVFMLI1KG6LP1SEDTIT1NTEADA1ILQEKQTA1	N/A	N/A	N/A	N/A	N/A	N/A	N/A	N/A	84	84
CLIBASIA_02955	0	CLIBASIA_02955	Q8PM59#PHI:3412#PstB#346#Xanthomonas_citri#loss_of_pathogenicity	Q8PM59#PHI:3412#PstB#346#Xanthomonas_citri#loss_of_pathogenicity	0	0	Q8PM59#PHI:3412#PstB#346#Xanthomonas_citri#loss_of_pathogenicity	Q8PM59#PHI:3412#PstB#346#Xanthomonas_citri#loss_of_pathogenicity	6	254	20	267	KMISNKVSVCYGEKRALFDINLKIPQNSVTALIGPSGCGKSTFLRCLNRMNETIDNCVFTGEIILDGKNIYQSSVDVVRLRARVGMVFQRPNPFPKSIYDNVAYGPRIHGLGNNKADIDQIVEMSLKKASLFNEVKDRLFHDASLLSGGQQQRVCIARALAVNPEVILMDEPCSALDPIATASVEELIHELRESLTIVIVTHSMQQAARVSQRAAMFHMGHLVEEDDTDKMFTAPSDQRTQDYIMGRFG	KVAARNLDFYYDKYHALKSINIEIPEKRVTALIGPSGCGKSTLLRIFNRIYALYPKMEARGEVLLDNENILSPKYPMNRLRSKVGMVFQKPVPFPMTIFENVAYGIR-HHEKLSKADMQNRVEQALRQGALWDEVKDKLGQSALGLSGGQQQRLCIARAVALRPDVLLLDEPTSALDPISTSRIEQLVEELKRDYTIVIVTHNMQQAARVSDYTAFMYLGDLIEHDRTETIFSQPSKQQTEDYITGRFG	1e-89	268	686	249	52.21	130	118	178	1	1	71.49	44562	1	1MVIASANRKNVLSDVFCY1GDEKKYRH2FKDS2LIKE2QENKSR14FL2CILF2MINYEATLIYDPNKCMVEFATR2IVIL2GNKE2YLQSSPSKVYDPVMVN3ASRK6RK1NV3KMST1YFDE5PI1I-1GHLEGKNLNS3IMDQQNIR2MQSA1KRKQAGSA1FWND4RK1FGHQDS1SLLG8VL5LV1VLNR1ED1IL1ML3CT6AS1ASSRVI1EQ1IVHE2RKERSDLY7SN8QDRYAT1MFFMHYML1HD1VI1EH1DR1DEKTMI1TSAQ2DK1RQ1QE3MT4	N/A	N/A	N/A	N/A	N/A	N/A	N/A	N/A	98	98
CLIBASIA_01540	0	CLIBASIA_01540	G4NCL5#PHI:877#MGG_00383#318829#Magnaporthe_oryzae#reduced_virulence	G4NCL5#PHI:877#MGG_00383#318829#Magnaporthe_oryzae#reduced_virulence	0	0	G4NCL5#PHI:877#MGG_00383#318829#Magnaporthe_oryzae#reduced_virulence	G4NCL5#PHI:877#MGG_00383#318829#Magnaporthe_oryzae#reduced_virulence	5	399	16	387	FLFTSESVSEGHPDKICDRISDEIVDLVYREAIESKMDVNSVRVACEVLVTKNKVIVAGEVRLPHGLSKKDSITGQYVVDKEKFEKVVRSVIRSIGYE--QEGFHWETVDVEVLLHSQSSDIAYGVDNASDDCSTLGAGDQGIMFGYACRETADFMPAPIYYAHRILRTLADARKNSGGDVSKLGPDAKSQVTIRYV-DNKVC---EVKSIVLSIQHFDPTWDRGKVRSVVEPYILKALEDIKISPDCSWYINPAGKFVIGGPCSDAGLTGRKIIVDTYGGASPHGGGAFSGKDITKVDRAAAYAARYLAKNIVAAGLADRCTIQLSYAIGISRPLSIFVDLHDSGKVSESCVANAINKVMDLSVSGIRDHLNLSRPIYAQTSAYGHFGRSANQDGFFP…	FLFTSESVGEGHPDKIADQVSDAVLDACLAQDPLSK-------VACETATKTGMIMIFGE------------ITTKAKVD---FQKAVREAIKDIGYDDSSKGFDYKTCNLLIAIEEQSPDIAQGL-HYEKALEELGAGDQGIMFGYATDETPELFPMTLLLAHQLNAAMSAARRD--GSLPWLRPDTKTQVTIEYKHDNGAVVPLRVDTVVVSAQHSEAITTEQLRKEILEKIIKKVIPSNMLDDKTVYHIQPSGLFIIGGPQGDAGLTGRKIIVDTYGGWGAHGGGAFSGKDFSKVDRSAAYLGRWIAKSLVAAGLARRALVQLSYAIGVAEPLSIYVDTYGTSEKTSEELVQIIRDNFDMKPGVIVKELDLAKPIYRQTAKNGHFG--TNQS--FS…	1e-87	273	699	401	42.64	171	195	235	10	35	58.6	44562	1	8SG7CA1RQIV2EAIVVL1LAVCYLRAEQADIPEL2M-D-V-N-S-V-R-4VTLAVTTKKTNGKMVIIMVIAF2V-R-L-P-H-G-L-S-K-K-D-S-2GTQKYAVK2K-E-K-1EQ1VA2SEVA1RKSD3ED-D-SQSEK2HDWYEK1VCDNVLELVILALIHESE2SP3YQ1VLD-NHAYSEDKDACLSETE13CTRD2APDEFLMF1AMPTILYLYL2RQILLNRATALMASDA2KRNDS-G-1DSVLSPKW1GR2AT1ST4RE1VK-H2KGVACV-V-P-LER1KDSTIV1LV1IA2FSDEPATIWTDTREGQKLVRRKSEVIVL1PKYI1LK1AVLIEPDSINKMILSDPDDKCTSVWYYH1NQ1AS1KL1VI4CQSG16AWSGPA10IFTS4A…	N/A	N/A	N/A	N/A	N/A	N/A	N/A	N/A	96	96
CLIBASIA_01795	0	CLIBASIA_01795	Q8PN16#PHI:4147#XAC1258#346#Xanthomonas_citri#reduced_virulence	Q8PN16#PHI:4147#XAC1258#346#Xanthomonas_citri#reduced_virulence	0	0	Q8PN16#PHI:4147#XAC1258#346#Xanthomonas_citri#reduced_virulence	Q8PN16#PHI:4147#XAC1258#346#Xanthomonas_citri#reduced_virulence	21	292	15	280	LFFSSVMLSGFEFIVMDPYGDIALQQASLIRIAVALMLLIVVPVFFSILFFAWKYRSTNKKARYDPKWCHSTLLELFVWLVPLVIVGFLAVITWDATHRMDPYAPLERISESKSIAKNSKPLVVEVVALDWKWLFLLPEQQVAIINELVVPIDRPLEFRITASSVMNSFYIPGLAGQIYAMAGMETKLHAVMNKKGAYSGFSANYSGRGFSHMRFKFYGKSEKGFEDWISKVKRQGTFLNRQEYLLL---KKPSERDSVRYFSPIEKGLYYSILN	LMLPFLLLAGCNSAILNPKGQIGHDEKQLLITSVVLMLIVVIPVIVMTIAFAWKYRASNTKARYEPDWSHSTAIEVVVWSIPCVIILVLAVLTWRSSHALDPYRPLD---------SDVKPITIEAVSLDWKWMFIYPDQNIATVNEIAFPVHTPLNFKITSDTVMNSFFIPHLGTMIYAMAGMETKLHLVANEPGEYFGLSTNYSGHGFSKMSFKAHAVDQAGFEAWVAKVKASPTALNAAEYQVLAANRNDKEQYPVTYYSSVQDGMFRSLVD	1e-87	268	685	275	44.73	123	140	179	2	12	65.09	44562	1	1FMFLSPSFVLML1SA1FCENFSIAVIMLDN1YK1DQ1AGLHQDQEAKSQ1ILRIITAS1AV3LIIV1VI2FIFVSMITLIFA6SATS1KT4DE1KD1CS3LALI1LVFV2LSVI1LC2VIGLFV3IL2DRASTS1RAML3AR2EDR-I-S-E-S-K-S-I-A-KSNDSV2LIVTVI1VA1AS5LM1LILY1ED1QNVI1ITIV2LIVAVF1IVDHRT2EN1RK2ASSDST5YF2GH1AGGTQM12AL1MA1KEKP1AE1SF1FL1AT4RH3HK1RS2FAYHGAKVSDEQKA3DA1IVSA3RAQSGP1FA2RAQA2LQLV1-A-A-NKRKNPDSK1RQDYSP1RT1FY1PSIVEQKD1LMYFYR1ILLVND	N/A	N/A	N/A	N/A	N/A	N/A	N/A	N/A	82	82
CLIBASIA_00785	0	CLIBASIA_00785	Q5ZUD9#PHI:6609#ClpP#446#Legionella_pneumophila#reduced_virulence	Q5ZUD9#PHI:6609#ClpP#446#Legionella_pneumophila#reduced_virulence	0	0	Q5ZUD9#PHI:6609#ClpP#446#Legionella_pneumophila#reduced_virulence	Q5ZUD9#PHI:6609#ClpP#446#Legionella_pneumophila#reduced_virulence	17	208	14	205	GLVPMVVEQTNRGERSYDIYSRLLKERIVFVTGQIEDHMATLICAQLLFLEAENPQKEISLYINSPGGVVTAGMAIYDTMQFIKPPISTFCMGQAASMGSLLLSAGEKGMRFALPNARILLHQPSGGFSGQASDIERHAQDIVKIKRRLNEIYVKNCGKTYEEVEKTLDRDHIMSASEACDWGVVDKVLMSR	GLIPMVIEQTSRGERSYDIYSRLLKERIIFLLGEVEDHMANLVVAQLLFLESENPEKDISLYINSPGGVVTAGLAIYDTMQFIKPDVSTLCIGQAASAAALLLCAGAEGKRFCLPNSRVMIHQPLGGYRGQATDIEIHARETLAVRERLNNIMAKHTKKTPDQIMRDTERDNFMSATQAMEYGLIDKVLYDR	7e-87	258	659	192	63.54	122	70	162	0	0	84.38	44562	1	2VI3VI3NS17VI1VLTL1QEIV5TN1IVCV7AS3QE1ED15ML11PDIV2FL1MI5MAGASA3SC2EAKE1MK2AC3AS1IVLMLI3SL2FYSR3ST3RI2QRDEITVLKAIVKRRE3EN1YMVA1NHCTGK2YPEDEQVIEMKRTDLTDE2HNIF3STEQ1CMDEWY1VLVI4MYSD1	N/A	N/A	N/A	N/A	N/A	N/A	N/A	N/A	89	89
CLIBASIA_01995	0	CLIBASIA_01995	P74856#PHI:8727__PHI:9175#SsaV#28901#Salmonella_enterica#reduced_virulence__unaffected_pathogenicity	P74856#PHI:8727__PHI:9175#SsaV#28901#Salmonella_enterica#reduced_virulence__unaffected_pathogenicity	0	0	P74856#PHI:8727__PHI:9175#SsaV#28901#Salmonella_enterica#reduced_virulence__unaffected_pathogenicity	P74856#PHI:8727__PHI:9175#SsaV#28901#Salmonella_enterica#reduced_virulence__unaffected_pathogenicity	18	692	22	670	HDFAFSFCIVLIICILFLPIPTVLLDVGLASSIALSILILMVALWIEKPLEFSSFPTVLLIVTIIRLSLNIATTRAILSFGHEGYGAAGGIIAGFSSLVMSGDFVIGLVVFMILITINFIVITKGATRIAEVGARFTLDAIPGKQMAIDADLSSGLIEEEEAKRRRKELEEESAFFGAMDGASKFVRGDAIASIIITAINIVGGIVIGCFRYDMSIHHAADVFVRLSVGDGLVSQVPALIISLSAAFLVSRTTSKGSTN--TAIVEQLSHYPRALLISAFFMIVLSVMPNLPAFPFIMLGGFFACAGFYVPYKNELQRLAKVAQIQEASKQNQHSAQLNFITSGVELVLGSLVSNRLLSSQEDLFLRVSKIRRKFAVQYGFIVPEIKVTTDISLPEKGY…	QDMVLATVLLIAIVMMLLPLPTWMVDILITINLMFSVILLLIAIYLSDPLDLSVFPSLLLITTLYRLSLTISTSRLVL-LQHN----AGNIVDAFGKFVVGGNLTVGLVVFTIITIVQFIVITKGIERVAEVSARFSLDGMPGKQMSIDGDLRAGVIDADHARTLRQHVQQESRFLGAMDGAMKFVKGDTIAGIIVVLVNIIGGIIIAIVQYDMSMSEAVHTYSVLSIGDGLCGQIPSLLISLSAGIIVTRVPGEKRQNLATELSSQIARQPQSLILTAVVLMLLAL---IPGFPFITLAFFSALLALPIILIRRKKSVVSANGVEAPEKD-------SMVPGACPLILR--LSPTLHSA--DLIRDIDAMRWFLFEDTGVPLPEVNIEV-LPEPTEKL…	4e-86	286	732	694	29.68	206	424	357	15	64	51.44	44562	1	HQ1FMAVFLSAFTCVILVLLIIA1CVIMLMFL2IL2VWLMLV1VIGLLIATSISNILAMLF1IVLIIL1MLVI1LIWYILESKD2EDFL1SV2TSVL3VT1ILIY4NT1AS1TS1ALIV1S-FLGQ1ENG-Y-G-A-2GN1IVADGA1SGSKLF1MVSG1DNFLVTIV5MT1LIITTIIVNQ7AITE1IV3GS3TS2AGIM5AS2AG2SRSA1LV1EDEAEDEH1KRRTRL1KQEHLVEQEQ2AR1FL6SM3RK2AT2SG2IVTVALIV2VI3VI1GACIFVRQ4IMHSHE1AVDHVTFYVSRV2VI4VCSG1VI1AS1IL5AGFILI1ST1TVTPSGKEGKSRTQ1-L-A1AEILVSES1LISAHRYQ1RQAS1LIILST1FVFVMLIMVL1SAVLM-…	N/A	N/A	N/A	N/A	N/A	N/A	N/A	N/A	98	98
CLIBASIA_01995	0	CLIBASIA_01995	D0ZWU0#PHI:2621__PHI:6966__PHI:8303__PHI:9831__PHI:9832__PHI:9833__PHI:10144#SsaV__STM14_RS07925_(ssaV)#28901#Salmonella_enterica#reduced_virulence__unaffected_pathogenicity	D0ZWU0#PHI:2621__PHI:6966__PHI:8303__PHI:9831__PHI:9832__PHI:9833__PHI:10144#SsaV__STM14_RS07925_(ssaV)#28901#Salmonella_enterica#reduced_virulence__unaffected_pathogenicity	0	0	D0ZWU0#PHI:2621__PHI:6966__PHI:8303__PHI:9831__PHI:9832__PHI:9833__PHI:10144#SsaV__STM14_RS07925_(ssaV)#28901#Salmonella_enterica#reduced_virulence__unaffected_pathogenicity	D0ZWU0#PHI:2621__PHI:6966__PHI:8303__PHI:9831__PHI:9832__PHI:9833__PHI:10144#SsaV__STM14_RS07925_(ssaV)#28901#Salmonella_enterica#reduced_virulence__unaffected_pathogenicity	18	692	22	670	HDFAFSFCIVLIICILFLPIPTVLLDVGLASSIALSILILMVALWIEKPLEFSSFPTVLLIVTIIRLSLNIATTRAILSFGHEGYGAAGGIIAGFSSLVMSGDFVIGLVVFMILITINFIVITKGATRIAEVGARFTLDAIPGKQMAIDADLSSGLIEEEEAKRRRKELEEESAFFGAMDGASKFVRGDAIASIIITAINIVGGIVIGCFRYDMSIHHAADVFVRLSVGDGLVSQVPALIISLSAAFLVSRTTSKGSTN--TAIVEQLSHYPRALLISAFFMIVLSVMPNLPAFPFIMLGGFFACAGFYVPYKNELQRLAKVAQIQEASKQNQHSAQLNFITSGVELVLGSLVSNRLLSSQEDLFLRVSKIRRKFAVQYGFIVPEIKVTTDISLPEKGY…	QDMVLATVLLIAIVMMLLPLPTWMVDILITINLMFSVILLLIAIYLSDPLDLSVFPSLLLITTLYRLSLTISTSRLVL-LQHN----AGNIVDAFGKFVVGGNLTVGLVVFTIITIVQFIVITKGIERVAEVSARFSLDGMPGKQMSIDGDLRAGVIDADHARTLRQHVQQESRFLGAMDGAMKFVKGDTIAGIIVVLVNIIGGIIIAIVQYDMSMSEAVHTYSVLSIGDGLCGQIPSLLISLSAGIIVTRVPGEKRQNLATELSSQIARQPQSLILTAVVLMLLAL---IPGFPFITLAFFSALLALPIILIRRKKSVVSANGVEAPEKD-------SMVPGACPLILR--LSPTLHSA--DLIRDIDAMRWFLFEDTGVPLPEVNIEV-LPEPTEKL…	4e-86	286	732	694	29.68	206	424	357	15	64	51.44	44562	1	HQ1FMAVFLSAFTCVILVLLIIA1CVIMLMFL2IL2VWLMLV1VIGLLIATSISNILAMLF1IVLIIL1MLVI1LIWYILESKD2EDFL1SV2TSVL3VT1ILIY4NT1AS1TS1ALIV1S-FLGQ1ENG-Y-G-A-2GN1IVADGA1SGSKLF1MVSG1DNFLVTIV5MT1LIITTIIVNQ7AITE1IV3GS3TS2AGIM5AS2AG2SRSA1LV1EDEAEDEH1KRRTRL1KQEHLVEQEQ2AR1FL6SM3RK2AT2SG2IVTVALIV2VI3VI1GACIFVRQ4IMHSHE1AVDHVTFYVSRV2VI4VCSG1VI1AS1IL5AGFILI1ST1TVTPSGKEGKSRTQ1-L-A1AEILVSES1LISAHRYQ1RQAS1LIILST1FVFVMLIMVL1SAVLM-…	N/A	N/A	N/A	N/A	N/A	N/A	N/A	N/A	98	98
CLIBASIA_00840	0	CLIBASIA_00840	J5K974#PHI:6470#Trr1#176275#Beauveria_bassiana#unaffected_pathogenicity	J5K974#PHI:6470#Trr1#176275#Beauveria_bassiana#unaffected_pathogenicity	0	0	J5K974#PHI:6470#Trr1#176275#Beauveria_bassiana#unaffected_pathogenicity	J5K974#PHI:6470#Trr1#176275#Beauveria_bassiana#unaffected_pathogenicity	6	314	3	315	SKILIIGSGPAGYTAAIYAARAMLKPVIIAG-----SDLGGQLMITESIENYPGFATSIRGDWLMEQMRQQAENFGTKIIQDLVVSVDLDRHPFLVETQ-SGDLWH-ADAVVIATGSEVKWLRLESEKKFQGFGVSACATCDGF--FYKNKDVIVVGGGNTAAEEALHLAKIARRVTIVHRRSSLRSEKILQEKLFLQSNIDFLFDTEVVDVIGSIPEPPLFPSVSGVRLHNKKEGNFFERNVDGIFIAIGYKPNTKIFRHQLKMTNTNYIWTMPDSTATSIPGIFAAGDVADERYRQAITAAAMGCMAALEVEHYLS	SKVVIIGSGPAAHTAAVYLARAELKPVLYEGFMANGTAAGGQLTTTTEVENFPGFPKGIMGQELMDNMRAQSERFGTEIITDTVTTLDLSSRPFKYSTEFSPEETHTADAVIIATGASARRMGLPGEDKYWQNGISACAVCDGAVPIFRNKPLFVIGGGDSAAEEATFLTKYGSHVTVLVRRDQLRASKTMAKRLLEHPKVTVRFHSSATEIRGG--DDGL---MSHIVVKNNATGTEEVLEGSGLFYAIGHDPATALVKGQMDMDSEGYVVTKPGTTLTSVPGVFAAGDVQDKRYRQAITSAGTGCMAALEAEHYLA	1e-85	263	671	318	44.65	142	162	196	6	14	61.64	44562	1	2IVLV7GAYH3IV1AL3ME4ILIYAE1-F-M-A-N-GSTDALA4MTIT1ETSEIV2YF3APTKSG1RM1DQWE2EDQN2QA1AS1NR3KE2QT1LT1VTSTVL2DSRSHR2LKVYES1QE-F1GPDELEWT1-T4VI4SAESVAKRWRLMRG1EPSG1KD1FYQWGQFN1VI4TV3FA-V-PFIYFKR2DPVLIF1VI3NDTS5LTHF1AT1IYAGRSRH2IVVLHV2SDSQ2SAES1ITLMQAEKKR1FLLEQHSPNKIVDTFVLR1DHTSESVAVTDEVIIR1SGI-P-EDPDPG1F-P-S-VM1GHVIRVLVHK1KNKAET1NTFEFEEVRLNEVGDS1IL1IY3YHKD1NA1KAILFVRKHG1LMKD1TDNSTENG1IVWV1MK1DGST1AL2IV…	N/A	N/A	N/A	N/A	N/A	N/A	N/A	N/A	96	96
CLIBASIA_01995	0	CLIBASIA_01995	Q8Z6M9#PHI:608#SsaV#28901#Salmonella_enterica#reduced_virulence	Q8Z6M9#PHI:608#SsaV#28901#Salmonella_enterica#reduced_virulence	0	0	Q8Z6M9#PHI:608#SsaV#28901#Salmonella_enterica#reduced_virulence	Q8Z6M9#PHI:608#SsaV#28901#Salmonella_enterica#reduced_virulence	18	692	22	670	HDFAFSFCIVLIICILFLPIPTVLLDVGLASSIALSILILMVALWIEKPLEFSSFPTVLLIVTIIRLSLNIATTRAILSFGHEGYGAAGGIIAGFSSLVMSGDFVIGLVVFMILITINFIVITKGATRIAEVGARFTLDAIPGKQMAIDADLSSGLIEEEEAKRRRKELEEESAFFGAMDGASKFVRGDAIASIIITAINIVGGIVIGCFRYDMSIHHAADVFVRLSVGDGLVSQVPALIISLSAAFLVSRTTSKGSTN--TAIVEQLSHYPRALLISAFFMIVLSVMPNLPAFPFIMLGGFFACAGFYVPYKNELQRLAKVAQIQEASKQNQHSAQLNFITSGVELVLGSLVSNRLLSS--QEDLFLRVSKIRRKFAVQYGFIVPEIKVTTDISLPEK…	QDMVLATVLLIAIVMMLLPLPTWMVDILITINLMFSVILLLIVIYLSDPLDLSVFPSLLLITTLYRLSLTISTSRLVL-LQHN----AGNIVDAFGKFVVGGNLTVGLVVFTIITIVQFIVITKGIERVAEVSARFSLDGMPGKQMSIDGDLRAGVIDADHARTLRQHVQQESRFLGAMDGAMKFVKGDTIAGIIVVLVNIIGGIIIAIVQYDMSMSEAVHTYSVLSIGDGLCGQIPSLLISLSAGIIVTRVPGEKRQNLATELSSQIARQPQSLILTAVVLMLLAL---IPGFPFITLAFFSALLALPIILIRRKKSVVSANGIEAPEKD-------SMVPGACPLIL------RLTPTLHSADLIRDIDAMRWFLFEDTGVPLPEVNIEV-LPEPTE…	2e-85	284	727	696	29.45	205	423	354	15	68	50.86	44562	1	HQ1FMAVFLSAFTCVILVLLIIA1CVIMLMFL2IL2VWLMLV1VIGLLIATSISNILAMLF1IVLIIL1MLVIAVLIWYILESKD2EDFL1SV2TSVL3VT1ILIY4NT1AS1TS1ALIV1S-FLGQ1ENG-Y-G-A-2GN1IVADGA1SGSKLF1MVSG1DNFLVTIV5MT1LIITTIIVNQ7AITE1IV3GS3TS2AGIM5AS2AG2SRSA1LV1EDEAEDEH1KRRTRL1KQEHLVEQEQ2AR1FL6SM3RK2AT2SG2IVTVALIV2VI3VI1GACIFVRQ4IMHSHE1AVDHVTFYVSRV2VI4VCSG1VI1AS1IL5AGFILI1ST1TVTPSGKEGKSRTQ1-L-A1AEILVSES1LISAHRYQ1RQAS1LIILST1FVFVMLIMVL1SAVLM…	N/A	N/A	N/A	N/A	N/A	N/A	N/A	N/A	98	98
CLIBASIA_02855	0	CLIBASIA_02855	A0A0H3LK50#PHI:9184#BscN#518#Bordetella_bronchiseptica#unaffected_pathogenicity	A0A0H3LK50#PHI:9184#BscN#518#Bordetella_bronchiseptica#unaffected_pathogenicity	0	0	A0A0H3LK50#PHI:9184#BscN#518#Bordetella_bronchiseptica#unaffected_pathogenicity	A0A0H3LK50#PHI:9184#BscN#518#Bordetella_bronchiseptica#unaffected_pathogenicity	18	419	20	421	NLVVQGGYISSITSVYYTVTCLSQY--VCLGDFVVHQGKNSDNLGQVIRINLDIVYICPVGIGEEISLGDLVFHWGRFRISP-SACWCGRVINALGKPIDGDDSLGKGDLSME----IMSKVPPAMNRQRVEKGFKTGIRVIDIFTPLCHGQRIGVFAGSGIGKSTLLSMFARSDCFDKVIISLVGERGREVREFIEDYLG-DNLKKSVVVVATSDESPILRKMAPLTAVTIAEYFSSKGDNVLLILDSITRFAHSIREIATNSGELPVARGYPTSVFSELPRLLERIGPSEKEKGNITAVISVLVDGDNHNDPIADSVRSILDGHIVLNRSLAEEGRYPPVDPLASVSRLADKAWSADEKKLVSSLTHLIHRFEETRDIRLIGGYRPGVDLILDKAVH…	TLRIKGRVVQVVGTIIKAVVPMVKIGEVCL---LRNPGEDFEMHGEVVGFVRDAALLTPIGDMYGISSATEVIPTGRTHMVPVGPGLLGRVLDGLGRPLDVAES---GPLHAHKFYPVFADAPDPLTRRIIHAPLELGVRVLDGLLTCGEGQRLGIFAAAGGGKSTLLGMLVKGAAVDVTVVALIGERGREVREFLEHELGPEGRRKSVIVCATSDKSSMERAKAAYVATAIAEYFRDQGQRVLFLMDSVTRFARAQREIGLAAGEPPTRRGYPPSVFATLPKLMERAGMNQT--GSITALYTVLVEGDDMNEPVADETRSILDGHIVLSRKLGAANHYPAVDVLASASRVMNAVVSPRHKYLAGRMRELMAKYQDVELLVKIGEYKQGADASTDEAIQ…	2e-85	270	691	410	38.29	157	237	236	7	16	57.56	44562	1	NT1VRVIQK1GRYVIVSQSVIVTGSTVIYIYKTA1TVCPLMSVQKYI-G-E3G-D-F-VLVRHNQP1KENDSFDENMLH1QE1IVRGIFNVLR1IAVAYLILCT1VI1IDGMEYEG2LSGADTLE1FIHPWT2FTRHIMSV1-VSGAPCGWLCL3ILNDAG2KR1IL1GVDADE1L-G-K-1DP1SHMAEH-K-F-Y-PIVMFSAKDVA1PDAPMLNT1QRRIVIEHKAGPFLKETL1IV2IL1IGFLTLPTLCCGHE3IL1VI2GASA1IG6SG1FLAVRKSGDACAFV1KVVTIVIVSA1VI10IL1DHYE2-PDENGLRKR3VI1VC4EK1PSIMLE1KAMK1PALYTV1VTTA5SRSDKQ1DQNR2LFILLM2IV4HRSAIQ3AGTLNASA2LP1…	N/A	N/A	N/A	N/A	N/A	N/A	N/A	N/A	92	92
CLIBASIA_04730	0	CLIBASIA_04730	P07014#PHI:7965#SdhB#562#Escherichia_coli#reduced_virulence	P07014#PHI:7965#SdhB#562#Escherichia_coli#reduced_virulence	0	0	P07014#PHI:7965#SdhB#562#Escherichia_coli#reduced_virulence	P07014#PHI:7965#SdhB#562#Escherichia_coli#reduced_virulence	29	257	4	236	EYRIYRWNPDNKGNPCMDTYYVDLDNCGPM-VLDGLLYIKNKIDPTLTLRRSCREGICGSCGMNIDGTNTLACVKDMKDIKGA---IAVYPLPHMSVIKDLVVDMSHFYSQHRSIEPWL-KTVSPKPAKELLQSHEDRQKIDGLYECVMCACCSTSCPSYWWNSDRYLGPAILLQAYRWLIDSRDEFQGERLDNLEDPFRLYRCHTIMNCTQSCPKGLNPAKAIAKIKMMLLDR	EFSIYRYNPDVDDAPRMQDYTLEADEGRDMMLLDALIQLKEK-DPSLSFRRSCREGVCGSDGLNMNGKNGLACITPISALNQPGKKIVIRPLPGLPVIRDLVVDMGQFYAQYEKIKPYLLNNGQNPPAREHLQMPEQREKLDGLYECILCACCSTSCPSFWWNPDKFIGPAGLLAAYRFLIDSRDTETDSRLDGLSDAFSVFRCHSIMNCVSVCPKGLNPTRAIGHIKSMLLQR	4e-85	256	654	234	53.42	125	103	162	4	6	69.23	44562	1	1YFRS3WY3NVKDGDNA1CR1DQTD1YTVLDELA1NECGGRPD1-MVL2GA1LIYQIL1NE1I-2TS1TSLF7IV3CD1ML1IMDN1TK1TG3VIKTDPMIKSDAILKNGQAP-G-K-K1AVVIYR3HGMLSP2KR6SGHQ2SA1HYRESK1EK1WY1-LKNTNVGSQPNKP2KR1LH2SMHP1DQ1QE1IL6VIML10YF3SP1RKYFLI3IG2QA3WF6ETFEQTGDES3NG1ES1PA1RSLVYF3TS4TVQSSV7ATKR2AGKH2MS3DQ1	N/A	N/A	N/A	N/A	N/A	N/A	N/A	N/A	88	88
CLIBASIA_00230	0	CLIBASIA_00230	A0A2L1CGE9#PHI:10445__PHI:11348#ClpB#263#Francisella_tularensis#reduced_virulence__unaffected_pathogenicity__effector_(plant_avirulence_determinant)	A0A2L1CGE9#PHI:10445__PHI:11348#ClpB#263#Francisella_tularensis#reduced_virulence__unaffected_pathogenicity__effector_(plant_avirulence_determinant)	0	0	A0A2L1CGE9#PHI:10445__PHI:11348#ClpB#263#Francisella_tularensis#reduced_virulence__unaffected_pathogenicity__effector_(plant_avirulence_determinant)	A0A2L1CGE9#PHI:10445__PHI:11348#ClpB#263#Francisella_tularensis#reduced_virulence__unaffected_pathogenicity__effector_(plant_avirulence_determinant)	172	428	140	401	VNDYQ------AKTDLNLFPALSAYCVDLTEKVKKGKVDILVGRHEEINRTIQILCRRSKNNPLYVGDPGVGKTAIAEGFAKQIVDGMVPDILLGARIFSLDMGNLIAGTRYRGDFEERIKKIVKEI-ESYANAILYIDEIHTLVGAGSASGISVDASNLLKPALSSGAVRCIGSTTYSEYRQFFEKDKALVRRFQKIDVSEPSIEDAIEIVKGIKPYFEEHHQLRYSKEAIRAAVQLSVRHFTSRKLPDKAIDVIDEAGASQI	VNDYRGGEKVSSQNQEDMKGALDKYTVDLTDLARKGKIDPIIGRDSEIRRTIQVLQRRTKNNPVLIGEPGVGKTAIVEGLAQRIVNDEVPEGVKGKKVLSLDMGALLAGAKFRGDFEERLKSVLKELSKQEGNVILFIDELHTMVGAGKAEG-SMDAGNMLKPALARGELKCVGATTLDEYREYVEKDPALERRFQKVLVDEPTVEDTIAILRGLKERYELHHGVNITDSAIVSAATLSHRYITDRQLPDKAIDLVDEA-ASQI	1e-84	288	738	264	53.03	140	115	196	4	9	74.24	44562	1	4QR-G-G-E-K-V-SASKQTNDQLENDLMFKPG2SDAK1CT4EDKLVAKR3VI1IPLIVI2HDES2NR4IV1CQ2ST4LVYLVI1DE8AV2FL1KQQR2DNGDME2DEIGLVLK1AKRKIVFL5NA1IL2TARKYF7IL1KSIVVL2IL-SEKSQYEAG1AV2YF3IL2LM4SK1SE1I-1VM2SG1LM5SASR1AEVLRK1IV1SA2YLSD3QEFYFV3KP2VE5IVDL1SD2STIV2AT1EA1VLKR1IL1PEYRFY1EL2QGLVRNYISTKDES2RVAS1VAQT2VH1HYFI1SD1KQ7VLIV3G-4	N/A	N/A	N/A	N/A	N/A	N/A	N/A	N/A	72	32
CLIBASIA_01995	0	CLIBASIA_01995	P35656#PHI:10248#HrcV#305#Ralstonia_solanacearum#reduced_virulence	P35656#PHI:10248#HrcV#305#Ralstonia_solanacearum#reduced_virulence	0	0	P35656#PHI:10248#HrcV#305#Ralstonia_solanacearum#reduced_virulence	P35656#PHI:10248#HrcV#305#Ralstonia_solanacearum#reduced_virulence	14	691	4	688	RNHLHDFAFSFCIVLIICILFL----PIPTVLLDVGLASSIALSILILMVALWIEKPLEFSSFPTVLLIVTIIRLSLNIATTRAILSFGHEGYGAAGGIIAGFSSLVMSGDFVIGLVVFMILITINFIVITKGATRIAEVGARFTLDAIPGKQMAIDADLSSGLIEEEEAKRRRKELEEESAFFGAMDGASKFVRGDAIASIIITAINIVGGIVIGCFRYDMSIHHAADVFVRLSVGDGLVSQVPALIISLSAAFLVSRTT------SKGSTNTAIVEQLSHYPRALLISAFFMIVLSVMPNLPAFPFIMLGGFFACAGFYVPYKNEL----QRLAKVAQIQEASKQNQHS--AQLNFITSGVELVLGSLVSNRLLSSQEDLFLRVSKIRRKFAVQYGF…	KNAIQDFSGEIGIAALVVAVVALMVLPLPTMLIDALLGLNITLSVVLLMVTMYIPSATSLSAFPSLLLFTTLLRLSLNIASTKSILL-----HADAGHIIESFGKLVVGGNLVVGLVVFLIITTVQFIVIAKGSERVAEVGARFTLDAMPGKQMSIDADLRAGHLSPEEARKRRALLAMESQLHGGMDGAMKFVKGDAIAGLVITLVNILAGIVIGITYHNMTAGEAANRFAVLSIGDAMVSQIPSLLISVAAGVMITRVSDEEQAHKQSSLGMEIVRQLSTSARAMFTASALLMGFALVPGFPSFLFVALATLIFVFGYTLRNRAKEGDGDEGDALPALLREGSKGKAPTIAEQAPSFTVPVGVRLGAELAKGLDVPALDTAFQ--QGRHALAEALGL…	1e-84	283	723	709	31.59	224	430	364	15	55	51.34	44562	1	RK1HALIHQ2ASFGSEFICG1VALAILIVCVIALVFVLA-L-M-V-L1IL2VM1LI1VAGL1AGSLSN1AT2IVLVIL3ATLMWY1EPKSPALTESFL1SA2TSVL2IFVT1ILIL7TS1RKAS2SLF-G-H-E-G-YHGAAD2GH2AEGS1SGSK2MVSG1DNFL1IV5ML1LIIT1IVNQ4TA2ASTE1IV11IM5AS5SRSA1LHILESEP3KRRK2KAEL1EAEM2AQFLFH1AG4SM3RK5SGILIV2ALIV2VLGA5CIFTRYYHDN1STIAHGHE2DNVR1VARV2VI2GALM3VI1AS1IL2LVSA1AGFVLMVIST1TVTS-D-E-E-Q-A-HSKKQGS1TLNGTMAE2ER3HTYSPA2LMLFITSAASFAFLMLIMVGLFSAVLMV1NG…	N/A	N/A	N/A	N/A	N/A	N/A	N/A	N/A	98	98
CLIBASIA_02855	0	CLIBASIA_02855	B7UMA6#PHI:11099#EscN#562#Escherichia_coli#reduced_virulence	B7UMA6#PHI:11099#EscN#562#Escherichia_coli#reduced_virulence	0	0	B7UMA6#PHI:11099#EscN#562#Escherichia_coli#reduced_virulence	B7UMA6#PHI:11099#EscN#562#Escherichia_coli#reduced_virulence	56	426	64	433	SDNLGQVIRINLDIVYICPVGIGEEISLGDLVFHWG-RFRISPSACWCGRVINALGKPIDGDDSLGKGDLSMEIMSKVPPAMNRQRVEKGFKTGIRVIDIFTPLCHGQRIGVFAGSGIGKSTLLSMFARSDCFDKVIISLVGERGREVREFIEDYLGDNLKKSVVVVATSDESPILRKMAPLTAVTIAEYFSSKGDNVLLILDSITRFAHSIREIATNSGELPVARGYPTSVFSELPRLLERIGPSEKEKGNITAVISVLVDGDNHNDPIADSVRSILDGHIVLNRSLAEEGRYPPVDPLASVSRLADKAWSADEKKLVSSLTHLIHRFEETRDIRLIGGYRPGVDLILDKAVHQVPIIYDFLKQSPSDLSS	SQRLAEVIAIDEDEVFLLPFEHVSGMYCGQWLSYQGDEFKIRVGDALLGRLIDGIGRPMESNIVAPYLPFERSLYAEPPDPLLRQVIDQPFILGVRAIDGLLTCGIGQRIGIFAGSGVGKSTLLGMICNGASADIIVLALIGERGREVNEFLALLPQSTLSKCVLVVTTSDRPALERMKAAFTATTIAEYFRDQGKNVLLMMDSVTRYARAARDVGLASGEPDVRGGFPPSVFSSLPKLLERAGPA--PKGSITAIYTVLLESDNVNDPIGDEVRSILDGHIVLTRELAEENHFPAIDIGLSASRVMHNVVTSEHLRAAAECKKLIATYKNVELLIRIGEYTMGQDPEADKAIKNRKLIQNFIQQSTKDISS	1e-84	268	686	372	40.86	152	217	218	2	3	58.6	44562	1	1DQNR1GAQE2RA1NDLE1IE1YFILCL1VFGEIHGVESEGIMSYLC1DQLWVLFSHYWQ1-DRE1RK1SRPVSGADCAWLCL2VL1NDAGLI1KR1IMDEGSDNDISVLAGPKYGLDPLFSEMRESILMYSAKEVP1PDAPMLNL2RVVIEDKQGP1KITL1IV1VA2IGFLTLPTLCCGHI5VI5IV6SG1FIACRNSGDACSFA1KIVIIVILSA1VI7RN2ILEADLYLLPGQDSNT1KS1SC1VL2AT3ERSPPAILLE1KMMK1PALF2VT6SRSDKQ1DK4IMLM2IV2FY1HRSAIA1EDIVAGTLNA3LPPD1ARRG1YF1TP4ES2RK4IA2SAE-K-EP2NS3VIIYST2VLDEGS2HV4AG1SE11NT1SE4GNRHYF1PAVI1PIL…	N/A	N/A	N/A	N/A	N/A	N/A	N/A	N/A	85	85
CLIBASIA_02855	0	CLIBASIA_02855	Q9I4N1#PHI:6995#Flil#287#Pseudomonas_aeruginosa#reduced_virulence	Q9I4N1#PHI:6995#Flil#287#Pseudomonas_aeruginosa#reduced_virulence	0	0	Q9I4N1#PHI:6995#Flil#287#Pseudomonas_aeruginosa#reduced_virulence	Q9I4N1#PHI:6995#Flil#287#Pseudomonas_aeruginosa#reduced_virulence	70	419	77	427	VYICPVGIGEEISLGDLVFHW---GRFRISPSACWCGRVINALGKPIDGDDSLGKGDLSMEIMSKVPPAMNRQRVEKGFKTGIRVIDIFTPLCHGQRIGVFAGSGIGKSTLLSMFARSDCFDKVIISLVGERGREVREFIEDYLGD-NLKKSVVVVATSDESPILRKMAPLTAVTIAEYFSSKGDNVLLILDSITRFAHSIREIATNSGELPVARGYPTSVFSELPRLLERIGPSEKEKGNITAVISVLVDGDNHNDPIADSVRSILDGHIVLNRSLAEEGRYPPVDPLASVSRLADKAWSADEKKLVSSLTHLIHRFEETRDIRLIGGYRPGVDLILDKAVHQVPIIYDFLKQ	VYLMPVGSLAGIAPGARVVPLPDTGRLPMGMS--MLGRVLDGAGRALDGKGGMRAEDWVPMDGPTINP-LKRHPISEPLDVGIRSINGLLTVGRGQRLGLFAGTGVGKSVLLGMMTRFTRADIIVVGLIGERGREVKEFIDEILGEEGLKRSVVVASPADDAPLMRLRAAQYCTRIAEYFRDKGKNVLLLMDSLTRYAQAQREIALAIGEPPATKGYPPSVFAKLPKLVERAGNAEAGGGSITAFYTVLSEGDDQQDPIADAARGVLDGHFVLSRRLAEEGHYPAIDIEASISRVMPQVVEAEHLRDAQRFKQLWSRYQQSRDLISVGAYVAGGDPETDLAIARFPVMRQFLRQ	1e-84	268	686	354	41.53	147	200	215	4	7	60.73	44562	1	2ILCM3ISGLEAEG1SALP1DALR1FVHPWL-P-D-T2FLRPIMSGPM1A-C-WMCL3ILNDAGLA1KRPAIL2DKDGSGLMGRKAGE1LWSVMPEMIDMGSPKTVIPN1A-MLNK1QHRPVIESKEGPFLKDTV3VS1DNIGFLTLPTLVCGHR3IL1VL3ST1IV3TV2SG1FMAT1SFDTCRFA1KIVIIVIVSG1VI7RK3EDDEYI2DE-ENG2KR4VAASTPSA1EDSA1ILLM1KLMR1PALQTYACVTTR5SRSD2DK4ILLM2IL2FY1HQSAIQ4TLNASI2LP1VAATRK3TP3SAEK2RK1LV2IA1PNSA1KAEGKG1NS3VFIYST2VSDE2NDHQNQ5SAVA1SGIV4IF2NS1SR5RH2PAVI1PILE2VI2LVAMDPKQAVW…	N/A	N/A	N/A	N/A	N/A	N/A	N/A	N/A	80	80
CLIBASIA_00230	0	CLIBASIA_00230	C6DC70#PHI:10595#ClpB#554#Pectobacterium_carotovorum#unaffected_pathogenicity	C6DC70#PHI:10595#ClpB#554#Pectobacterium_carotovorum#unaffected_pathogenicity	0	0	C6DC70#PHI:10595#ClpB#554#Pectobacterium_carotovorum#unaffected_pathogenicity	C6DC70#PHI:10595#ClpB#554#Pectobacterium_carotovorum#unaffected_pathogenicity	172	434	149	408	VNDYQAKTDLNLFPALSAYCVDLTEKVKKGKVDILVGRHEEINRTIQILCRRSKNNPLYVGDPGVGKTAIAEGFAKQIVDGMVPDILLGARIFSLDMGNLIAGTRYRGDFEERIKKIVKEI-ESYANAILYIDEIHTLVGAGSASGISVDASNLLKPALSSGAVRCIGSTTYSEYRQFFEKDKALVRRFQKIDVSEPSIEDAIEIVKGIKPYFEEHHQLRYSKEAIRAAVQLSVRHFTSRKLPDKAIDVIDEAGASQILQPLSK	VNDQGAEDQRQ---ALKKFTIDLTERAEQGKLDPVIGRDEEIRRTIQVLQRRTKNNPVLIGEPGVGKTAIVEGLAQRIVNGEVPEGLKNKRVLSLDMGALVAGAKYRGEFEERLKGVLNDLSKQEGNVILFIDELHTMVGAGKADG-AMDAGNMLKPALARGELHCVGATTLDEYRQYIEKDAALERRFQKVFVAEPTVEDTIAILRGLKERYELHHHVQITDPAIVAAAMLSHRYIADRQLPDKAIDLIDEAASSIRIQIDSK	2e-84	288	737	264	53.03	140	119	195	3	5	73.86	44562	1	3YQQG1KETDDQLRNQL-F-P-2SKAKYFCTVI4KRVAKEKQ2VL1IPLVVI2HD3NR4IV1CQ2ST4LVYLVI1DE8AV2FL1KQQR2DN1ME2DEIG1LKGNAK1IVFL5NA1IV2TARK3DE4IL1KGIVVLKNEDIL-SEKSQYEAG1AV2YF3IL2LM4SK1SD1I-SAVM2SG1LM5SASR1AEVLRH1IV1SA2YLSD4FYFI3KA2VE5IVDF1SA2STIV2AT1EA1VLKR1IL1PEYRFY1EL2QHLVRQYISTKDEP2RV2VAQM2VH1HYFITASD1KQ7VL4GAAS1QIIRLI1PILD2	N/A	N/A	N/A	N/A	N/A	N/A	N/A	N/A	72	33
CLIBASIA_02625	0	CLIBASIA_02625	P95830#PHI:6986#DnaJ#1313#Streptococcus_pneumoniae#reduced_virulence	P95830#PHI:6986#DnaJ#1313#Streptococcus_pneumoniae#reduced_virulence	0	0	P95830#PHI:6986#DnaJ#1313#Streptococcus_pneumoniae#reduced_virulence	P95830#PHI:6986#DnaJ#1313#Streptococcus_pneumoniae#reduced_virulence	1	380	1	376	MKKADFYQVLGIDRNATDRQLKTAFRSLAMKYHPDQNRNDPEAKEKFAQISEAYEVLRDPQKRALYDQGGHEALEYGAQSQGAGGFGAGMYGNSDFSELFEGIFGGIMGSGRSYKRSSSTGEAGADLRYNLEISLEEAFSGKTVQIRFPTAVKCSTCSGSGAKPGTNPMDCNICNGSGRVYTTAQSFFSIER---ACSTCRGSGQIIPHPCSKCHGQGRVSEEKLLSVNVPPGVDDGTRIRLSGEGGAGVYGGAPGDLYIFISVKKHQFFKRDGADLYCTVPISIVTVAMGGTFDVATLDATHSRVTIPEGTQTGKQFRLKGKGMPVINSGRKGDLYVQVQVETPQKLNKRQRELLEEFEQISSQDNNPQSTGFFARMKDFFD	MNNTEFYDRLGVSKNASADEIKKAYRKLSKKYHPDINK-EPGAEDKYKEVQEAYETLSDDQKRAAYDQYGAAGANGGFGGAGGFGGFNGAGGFGGFEDIFS-----SFFGGGGSSRNPNAPRQGDDLQYRVNLTFEEAIFGTEKEVKYHREAGCRTCNGSGAKPGTSPVTCGRCHGAGVINVDTQTPLGMMRRQVTCDVCHGRGKEIKYPCTTCHGTGHEKQAHSVHVKIPAGVETGQQIRLAGQGEAGFNGGPYGDLYVVVSVEASDKFEREGTTIFYNLNLNFVQAALGDTVDIPTVHGD-VELVIPEGTQTGKKFRLRSKGAPSLRGGAVGDQYVTVNVVTPTGLNDRQKVALKEFAAAGDLKVNPKKKGFFDHIKDAFD	2e-84	263	673	383	38.9	149	224	215	4	10	56.14	44562	1	1KNKNATDE2QDVR2IVDSRK2TSDARDQELI1TK1FY1SK1ASMK5QI1RKN-DE1EG1KEED1FYAKQEIVSQ4VT1RS1PD4LA3GY1HAEAAGLAENYG1AFQGSGQA1AGGF1FGGFAN1MAYG1NFSGDG1SEEDLI1ESG-I-F-G-G-ISMFGFSG1RGSGYSKS1SNSPSNTAGPERAQ1AD2RQ1NRLVENILSTLF3FISF1KTTEVKQEIVRKFYPHTRAEVAKG1SR2SN8NS1MVDT1NGIR1NH1SA1RVVIYNTVTDAT1STFPFLSGIMEM1-R-Q-VAT1SDTV1RH1SR1QKIE1PKHY2STKT3QT1RHVESKEQEAKHLSLVSH1NKVI1PA2DEDT1TQRQ3SA1EQ1GE2VFYN2APPY4IVFVIV2KEKAHSQDF…	N/A	N/A	N/A	N/A	N/A	N/A	N/A	N/A	99	99
CLIBASIA_02810	0	CLIBASIA_02810	Q5ZVD8#PHI:6520#LpdA#446#Legionella_pneumophila#effector_(plant_avirulence_determinant)	Q5ZVD8#PHI:6520#LpdA#446#Legionella_pneumophila#effector_(plant_avirulence_determinant)	0	0	Q5ZVD8#PHI:6520#LpdA#446#Legionella_pneumophila#effector_(plant_avirulence_determinant)	Q5ZVD8#PHI:6520#LpdA#446#Legionella_pneumophila#effector_(plant_avirulence_determinant)	6	470	13	460	DIILIGSGPAGYVAAIRAAQLGFKVAIVE-YAGLGGICLNWGCIPTKSLLRSAEILDHIQNAQHYGLNVAGKVEFNIEDIVKRSRDISHRLNRGVEFLMHKNKVDIIWGKATLKNPSEITVSKPSQPAVQPQHPIPKKVLGEGTYKAK--HIIIATGARPRHIEGIEPDSHLIWTYFDALKPSKTPKSLIVMGSGAIGVEFSSFYKSLDVDVSLIEVKDRILPVEDSEISQFVQRSLQKRGIKILTESKISSVKQKGDMVSVQVERKDGSVSSMQAEKLLLSAGVQGNIENIGLEKIGVKTS-NGCIIVDGYGRTNVPGIYAIGDVAGAPMLAHKAEHEGIICIEKIAGKSKVYPLDKSKIPGCTYCNPQVASIGLTEEKARSQGLDIRVGKHSFSANG…	DVVVLGSGPGGYTAAFRAADLDKKVVLVERFDSLGGVCLNVGCIPSKALLHIAKVVDEAHEMSEQGVAF-GKPKFDNKKLVAWKNSVVAKLTGGLKALAKQRKVEVITGTGKFSGTHQILVETK-----------------EGTVEIEFDNAIIAVGSESIKLPFI-PEDKRIFSSTGALELADIKGDLLVLGGGIIGLEMATVYSSLGVNVTVVEFMDQLIPNADADLVNILQKRMTKKGVKFLLKTKVTAVEAKKDGIYVSMEGEHATDKPLCFQQVLVSVGRKPNGGAINAEKAGIKVDERGFIPVDNQLRTNVPHIFAIGDVNGQPMLAHKAIPEGKVAAEVIAGKKHYF--EPKCIPSVAYTDPELAWAGLTEKEAKEKGINYEKASFPWAASG…	3e-84	270	689	469	34.33	161	283	269	7	25	57.36	44562	1	1IVIVLVIL4AG2VT2IF3QD1GDFK2AVIL2-RYFADGS3IV3WV4TS1SA2RHSI1EKIVLV1HEIAQHNEAMQSHEYQ1LVNAVFA-2VPEK1NDINEKDKIL1KARWSKRNDSIVSVHARK1NTRG1VLEKFA1MAHKKQNR2DEIV1WT1KTAGTKLFKSNGPTSHEQ1TL1SEKTPKS-Q-P-A-V-Q-P-Q-H-P-I-P-K-K-V-L-G-3YVKEAIKE-F-DHNIA3TV1ASREPSRIHKILEPGF1E-1DESDHKLR1WFTSYSFTDG2KEPLSAKDTIPKKGSD1IL1ML1SG1AI2VL1FMSASTFV1KS2DG1DN1STLVIV1VFKM1RQILLI1VNEA1SAEDILSVQNFIVL1RKSRLMQT1RK1IV1IF1TLEKST1IVSTSA1…	N/A	N/A	N/A	N/A	N/A	N/A	N/A	N/A	97	97
CLIBASIA_02855	0	CLIBASIA_02855	O68539#PHI:3411#BscN#518#Bordetella_bronchiseptica#reduced_virulence	O68539#PHI:3411#BscN#518#Bordetella_bronchiseptica#reduced_virulence	0	0	O68539#PHI:3411#BscN#518#Bordetella_bronchiseptica#reduced_virulence	O68539#PHI:3411#BscN#518#Bordetella_bronchiseptica#reduced_virulence	18	419	20	421	NLVVQGGYISSITSVYYTVTCLSQY--VCLGDFVVHQGKNSDNLGQVIRINLDIVYICPVGIGEEISLGDLVFHWGRFRISP-SACWCGRVINALGKPIDGDDSLGKGDLSME----IMSKVPPAMNRQRVEKGFKTGIRVIDIFTPLCHGQRIGVFAGSGIGKSTLLSMFARSDCFDKVIISLVGERGREVREFIEDYLG-DNLKKSVVVVATSDESPILRKMAPLTAVTIAEYFSSKGDNVLLILDSITRFAHSIREIATNSGELPVARGYPTSVFSELPRLLERIGPSEKEKGNITAVISVLVDGDNHNDPIADSVRSILDGHIVLNRSLAEEGRYPPVDPLASVSRLADKAWSADEKKLVSSLTHLIHRFEETRDIRLIGGYRPGVDLILDKAVH…	TLRIKGRVVQVVGTIIKAVVPMVKIGEVCL---LRNPGEDFEMHGEVVGFVRDAALLTPIGDMYGISSATEVIPTGRTHMVPVGPGLLGRVLDGLGRPLDVAES---GPLHAHKFYPVFADAPDPLTRRIIHAPLELGVRVLDGLLTCGEGQRLGIFAAAGGGKSTLLGMLVKGAAVDVTVVALIGERGREVREFLEHELGPEGRRKSVIVCATSDKSSMERAKAAYVATAIAEYFRDQGQRVLFRMDSVTRFARAQREIGLAAGDPPTRRGYPPSVFATLPKLMERAGMNQT--GSITALYTVLVEGDDMNEPVADETRSILDGHIVLSRKLGAANHYPAVDVLASASRVMNAVVSPRHKYLAGRMRELMAKYQDVELLVKIGEYKQGADASTDEAIQ…	4e-84	267	682	410	38.05	156	238	235	7	16	57.32	44562	1	NT1VRVIQK1GRYVIVSQSVIVTGSTVIYIYKTA1TVCPLMSVQKYI-G-E3G-D-F-VLVRHNQP1KENDSFDENMLH1QE1IVRGIFNVLR1IAVAYLILCT1VI1IDGMEYEG2LSGADTLE1FIHPWT2FTRHIMSV1-VSGAPCGWLCL3ILNDAG2KR1IL1GVDADE1L-G-K-1DP1SHMAEH-K-F-Y-PIVMFSAKDVA1PDAPMLNT1QRRIVIEHKAGPFLKETL1IV2IL1IGFLTLPTLCCGHE3IL1VI2GASA1IG6SG1FLAVRKSGDACAFV1KVVTIVIVSA1VI10IL1DHYE2-PDENGLRKR3VI1VC4EK1PSIMLE1KAMK1PALYTV1VTTA5SRSDKQ1DQNR2LFIRLM2IV4HRSAIQ3AGTLNASA1EDL…	N/A	N/A	N/A	N/A	N/A	N/A	N/A	N/A	92	92
CLIBASIA_02855	0	CLIBASIA_02855	A0A0F6B107#PHI:10145#STM14_RS07930_(ssaN)#28901#Salmonella_enterica#reduced_virulence	A0A0F6B107#PHI:10145#STM14_RS07930_(ssaN)#28901#Salmonella_enterica#reduced_virulence	0	0	A0A0F6B107#PHI:10145#STM14_RS07930_(ssaN)#28901#Salmonella_enterica#reduced_virulence	A0A0F6B107#PHI:10145#STM14_RS07930_(ssaN)#28901#Salmonella_enterica#reduced_virulence	54	432	49	425	KNSDNLGQVIRINLDIVYICPVGIGEEISLGDLVFHWGRFRISP-SACWCGRVINALGKPIDGDDSLGKGDLSMEIMSKVPPAMNRQRVEKGFKTGIRVIDIFTPLCHGQRIGVFAGSGIGKSTLLSMFARSDCFDKVIISLVGERGREVREFIEDYLGDNLKK-SVVVVATSDESPILRKMAPLTAVTIAEYFSSKGDNVLLILDSITRFAHSIREIATNSGELPVARGYPTSVFSELPRLLERIGPSEKEKGNITAVISVLVDGDNHNDPIADSVRSILDGHIVLNRSLAEEGRYPPVDPLASVSRLADKAWSADEKKLVSSLTHLIHRFEETRDIRLIGGYRPGVDLILDKAVHQVPIIYDFLKQSPSDLSSEDVFQE	KPGEELAEVVGINGSKALLSPFTSTIGLHCGQQVMALRRRHQVPVGEALLGRVIDGFGRPLDGRELPDVCWKDYDAMP--PPAMVRQPITQPLMTGIRAIDSVATCGEGQRVGIFSAPGVGKSTLLAMLCNAPDADSNVLVLIGERGREVREFIDFTLSEETRKRCVIVVATSDRPALERVRALFVATTIAEFFRDNGKRVVLLADSLTRYARAAREIALAAGETAVSGEYPPGVFSALPRLLERTGMGEK--GSITAFYTVLVEGDDMNEPLADEVRSLLDGHIVLSRRLAERGHYPAIDVLATLSRVFPVVTSHEHRQLAAILRRCLALYQEVELLIRIGEYQRGVDTDTDKAIDTYPDICTFLRQSKDEVCGPELLIE	4e-84	266	681	381	41.73	159	216	220	4	6	57.74	44562	1	1NPSGDENE1GAQE1IVRG2LGDSIKVAYLILCS1VFGTISGTEIEGILSHLC1DQLQ1FMHAWLGR1FRRHIQSV1-VSGAECAWLCL4NDAGLF1KR1IL2DRDESLLPGDKVGCDWLKSDMYEDIA1SPK-V-4NV2RPVIETKQGPFLKM4VA2ISFVTAPTLCCGHE3IV1VI1ASGASP1IV6SA1FLACRNSADPCDFA1KSVNIVILSV1VI11EDDFYT1GSDENELTKR1-RSC1VI6ERSPPAILLE1KVMR1PLLFTV1VT4YF1SRSDKN1DKNR1LV1ILLA2IL2FY1HRSAIA4TLNASA2LTPA1ASRGGE2TPSG3EA7IT1PMSG2E-K-1NS3VFIYST3DE2NDHM1DE1IL2SE3IL7NS1SR3ER1RH2PAVI1PV…	N/A	N/A	N/A	N/A	N/A	N/A	N/A	N/A	87	87
CLIBASIA_00785	0	CLIBASIA_00785	Q9I2U1#PHI:6213#ClpP#287#Pseudomonas_aeruginosa#reduced_virulence	Q9I2U1#PHI:6213#ClpP#287#Pseudomonas_aeruginosa#reduced_virulence	0	0	Q9I2U1#PHI:6213#ClpP#287#Pseudomonas_aeruginosa#reduced_virulence	Q9I2U1#PHI:6213#ClpP#287#Pseudomonas_aeruginosa#reduced_virulence	17	208	18	209	GLVPMVVEQTNRGERSYDIYSRLLKERIVFVTGQIEDHMATLICAQLLFLEAENPQKEISLYINSPGGVVTAGMAIYDTMQFIKPPISTFCMGQAASMGSLLLSAGEKGMRFALPNARILLHQPSGGFSGQASDIERHAQDIVKIKRRLNEIYVKNCGKTYEEVEKTLDRDHIMSASEACDWGVVDKVLMSR	GLVPMVVEQSARGERAYDIYSRLLKERIIFLVGQVEDYMANLVVAQLLFLEAENPEKDIHLYINSPGGSVTAGMSIYDTMQFIKPNVSTTCIGQACSMGALLLAGGAAGKRYCLPHSRMMIHQPLGGFQGQASDIEIHAKEILFIKERLNQILAHHTGQPLDVIARDTDRDRFMSGDEAVKYGLIDKVMTQR	5e-84	250	639	192	63.54	122	70	155	0	0	80.73	44562	1	9TSNA4SA12VI1VLTV2IV2HY2TN1IVCV11QE1ED1SH8VS5AS10PNIV2FT1MI3AC3SA3SAAG1EAKA1MK1FYAC2NHAS1IMLMLI3SL3SQ7RI2QKDE1VLKF2RE3EQ1YLVAKHNHCT1KQTPYLEDEVVIEAKRTDLT3HRIF2AGSD2CVDKWY1VLVI3LMMTSQ1	N/A	N/A	N/A	N/A	N/A	N/A	N/A	N/A	89	89
CLIBASIA_04785	0	CLIBASIA_04785	C4YR40#PHI:4904#Glr1#5476#Candida_albicans#reduced_virulence	C4YR40#PHI:4904#Glr1#5476#Candida_albicans#reduced_virulence	0	0	C4YR40#PHI:4904#Glr1#5476#Candida_albicans#reduced_virulence	C4YR40#PHI:4904#Glr1#5476#Candida_albicans#reduced_virulence	5	446	38	515	YDLVVIGAGSSGVRSARLAAQLGKKVAICEE--YRVGGTCVIRGCIPKKLMFYASQYSEYFEDSQGFGW-----SVDHKSFDWQSLITAQNKELSRLESFYHNRLESAGVEI---FA----SKG----ILSSPHSVYIANLNRT--------ITSRYIVVSTGGS---PNRMDFKGSDLCITSDEIFSLKSLPQSTLIIGGGYIAVEFAGILNSLGSKTTLVTRGNSILSKFDSDIRQGLTDVMISR-GMQVFHNDTIESVV-SESGQLKSILKSGKIVKTDQVILAVGRTPRTTGIGLEKVGVKMDENGFIITDCYSRTNVQSIFSLGDISGHIQLTPVAIHAAACFVETVFKDNPTIP----DYDLVPTAVFSKPEIASVGLTEEEAVQKFCR--LE…	FDYLVIGGGSGGVASARRAAKYGAKVLLIESNFKKFGGTCVNVGCVPKKVMWYTADLAHKKHDLYAYGLDKEPESIKYGDFDWAKLKHKRDAYVTRLNGIYENNLKREKVDYAYGFAKFINSEGEVEVTLSGDQELPFLDEGKTYKKGEKLVFSADKTLIATGGTAIVPPSV--PGAELGTISDGFFALEKQPKKVAIVGAGYIGVELSGVFSSLGSETHFFIRGDTVLRSFDEVIQNTVTDYYIDNLGINIHKQSTITKIEGSKDGKKVVHLKDGTSVEVDELIWTVGRK-SLIDIGLDKVGVKINDKQQIVADEYQVTNNPKIFSLGDVVGKVELTPVAIAAGRRLSNRLF-GGPEFAKDKLDYNNIPSVIFSHPEAGSIGLSTKEAIEKYGEENLK…	8e-84	269	687	482	37.14	179	259	266	15	44	55.19	44562	1	YF1LYVL3AG2SG2RA3LR2QKLY1KA2ALILCI1ES-N-FYKRKVF5INRV2IV3LV1FW1ATSAQDYLSAEHYKFKEH1SLQYGAFY1WL-D-K-E-P-E1VIDKHYKGSD3QASK1IKTHAKQRNDKAEYLVST2ENSGFI1HE1RN1EKSRAEGK1EDIY-A-Y-G2-K-F-I-N1KE1-E-V-E-VIT2SGPDHQSEVLYPIFALNDLENGRK1-Y-K-K-G-E-K-L-VIFTSSARDYKITVLVISA3ST-A-I-V1NPRSMVD-F-KP1SADE1CGITTI2EGIF1SA1KESKLQ1QKSKTVLA1IV1GA3AG2FLAS1IVLFNS4KE1THLFVFTI2NDSTIV1SRKS2SEDV1RQQNGTLV2VYMY1SDRN-L1MIQNVIFHHKNQDS2E…	N/A	N/A	N/A	N/A	N/A	N/A	N/A	N/A	96	96
CLIBASIA_02855	0	CLIBASIA_02855	D2TKF5#PHI:9332#EscN#67825#Citrobacter_rodentium#reduced_virulence	D2TKF5#PHI:9332#EscN#67825#Citrobacter_rodentium#reduced_virulence	0	0	D2TKF5#PHI:9332#EscN#67825#Citrobacter_rodentium#reduced_virulence	D2TKF5#PHI:9332#EscN#67825#Citrobacter_rodentium#reduced_virulence	59	431	67	443	LGQVIRINLDIVYICPVGIGEEISLGDLVFHWGR-FRISPSACWCGRVINALGKPIDGDDSLGKGDLSMEIMSKVPPAMNRQRVEKGFKTGIRVIDIFTPLCHGQRIGVFAGSGIGKSTLLSMFARSDCFDKVIISLVGERGREVREFIEDYLGDNLKKSVVVVATSDESPILRKMAPLTAVTIAEYFSSKGDNVLLILDSITRFAHSIREIATNSGELPVARGYPTSVFSELPRLLERIGPSEKEKGNITAVISVLVDGDNHNDPIADSVRSILDGHIVLNRSLAEEGRYPPVDPLASVSRLADKAWSADEKKLVSSLTHLIHRFEETRDIRLIGGYRPGVDLILDKAVHQVPIIYDFLKQSPSDLSS-----EDVFQ	LAEVIAINGDEVFLLPFEHVSGMYCGQWLSYQGEEFKIRVGDELLGRLVDGIGRPMGSNIATLYLPFKRSLYAEPPDPLLRQVIDQPFTLGVRAIDGLLTCGIGQRIGIFAGSGVGKSTLLGMICNGASADIIVLALIGERGREVNEFLALLPQSTLSKCVLVVTTSDRPALERMKAAFTATTIAEYFRDQGKNVLLMMDSVTRYARAARDVGLASGEPDVRGGFPPSVFSSLPKLLERAGPA--PKGSITAIYTVLLESDNVNDPIGDEVRSILDGHIVLTRELAEENHFPAIDIGLSASRVMHNVVKSEHLRAAAECKKLIATYKNIELLIRIGEYTMGQDPEADKAIKNRKAIQSFLQQSTKDISSYEKTIENLFK	1e-83	266	679	379	40.63	154	217	219	3	8	57.78	44562	1	1GAQE2RA2LG1IE1YFILCL1VFGEIHGVESEGIMSYLC1DQLWVLFSHYWQ1RE-E1RK1SRPVSGADCEWLCL2VLIVNDAGLI1KR1IMDGGSDNDISALTGLKYGLDPLFSKMRESILMYSAKEVP1PDAPMLNL2RVVIEDKQGP1KTTL1IV1VA2IGFLTLPTLCCGHI5VI5IV6SG1FIACRNSGDACSFA1KIVIIVILSA1VI7RN2ILEADLYLLPGQDSNT1KS1SC1VL2AT3ERSPPAILLE1KMMK1PALF2VT6SRSDKQ1DK4IMLM2IV2FY1HRSAIA1EDIVAGTLNA3LPPD1ARRG1YF1TP4ES2RK4IA2SAE-K-EP2NS3VIIYST2VLDEGS2HV4AG1SE11NT1SE4GNRHYF1PAVI1PILGAL1VA…	N/A	N/A	N/A	N/A	N/A	N/A	N/A	N/A	85	85
CLIBASIA_02855	0	CLIBASIA_02855	P40291#PHI:7902#YscN#633#Yersinia_pseudotuberculosis#unaffected_pathogenicity	P40291#PHI:7902#YscN#633#Yersinia_pseudotuberculosis#unaffected_pathogenicity	0	0	P40291#PHI:7902#YscN#633#Yersinia_pseudotuberculosis#unaffected_pathogenicity	P40291#PHI:7902#YscN#633#Yersinia_pseudotuberculosis#unaffected_pathogenicity	103	425	105	425	GRVINALGKPIDGDDSLGKGDLSMEIMSKVPPAMNRQRVEKGFKTGIRVIDIFTPLCHGQRIGVFAGSGIGKSTLLSMFARSDCFDKVIISLVGERGREVREFIEDYLGD-NLKKSVVVVATSDESPILRKMAPLTAVTIAEYFSSKGDNVLLILDSITRFAHSIREIATNSGELPVARGYPTSVFSELPRLLERIGPSEKEKGNITAVISVLVDGDNHNDPIADSVRSILDGHIVLNRSLAEEGRYPPVDPLASVSRLADKAWSADEKKLVSSLTHLIHRFEETRDIRLIGGYRPGVDLILDKAVHQVPIIYDFLKQSPSDLS	GQVLDGLGQPFDGGH-LPEPAAWYPVYQDAPAPMSRKLITTPLSLGIRVIDGLLTCGEGQRMGIFAAAGGGKSTLLASLIRSAEVDVTVLALIGERGREVREFIESDLGEEGLRKAVLVVATSDRPSMERAKAGFVATSIAEYFRDQGKRVLLLMDSVTRFARAQREIGLAAGEPPTRRGYPPSVFAALPRLMERAGQSSK--GSITALYTVLVEGDDMTEPVADETRSILDGHIILSRKLAAANHYPAIDVLRSASRVMNQIVSKEHKTWAGDLRRLLAKYEEVELLLQIGEYQKGQDKEADQAIERMGAIRGWLCQGTHELS	1e-83	265	678	324	45.06	146	174	202	3	4	62.35	44562	1	1RQ1ILNDAG2KQ1IF2DGDHS-1GPKEGPDALASWMYEPIVMYSQKDVA1PAAP1NS1QKRLVIETKTGPFLKSTL6IGFLTLPTLCCGHE3IM1VI2GASA1IG6SAMSFLAI2DACEFV1KVVTIVILSA1VI12DSYD2DE-ENG1KR1SA1VL6ERSPPSIMLE1KAMK1PGLFTV1VTTS5SRSDKQ1DKNR3ILLM2IV4HRSAIQ3AGTLNASA2LP1VTAR4TP3SAEA4LM2IA1PQ1ES1E-K-1NS3VLIYST3DE2NDHMNTDE1IV2SEVT8VI1NS1SK2EAEAGNRH2PAVI1PV1AR1VA2LVAMDNKQAIWV1AKDEEH1KTLWVASGSD1TRHR1ILHARKFY2TVREDLILRLLQ2GE1RQPK1VQ1LKIELA1KQ1VI…	N/A	N/A	N/A	N/A	N/A	N/A	N/A	N/A	74	74
CLIBASIA_03820	0	CLIBASIA_03820	B1MD40#PHI:11365#Mab_3083c#36809#Mycobacteroides_abscessus#unaffected_pathogenicity	B1MD40#PHI:11365#Mab_3083c#36809#Mycobacteroides_abscessus#unaffected_pathogenicity	0	0	B1MD40#PHI:11365#Mab_3083c#36809#Mycobacteroides_abscessus#unaffected_pathogenicity	B1MD40#PHI:11365#Mab_3083c#36809#Mycobacteroides_abscessus#unaffected_pathogenicity	11	548	25	555	LGGVGEIGMNMALYGYGSPSSRKWIMIDCGVSFPKDDLPGVDLVFPDITFIMKERKNLMAIFITHAHEDHYGALHDLWSFL-HVPVYASPFAIGLLEAKRVYERVSKKIPCISFQAGDKVDVGAFSIESVRVNHSIPETMALVIRSPVGNIVHTGDWKLDDDAILGDVTDKDSLCAIGNEGILALMCDSTNAMREGTCISEKGIKKNIYDIMKNAKGCVLVTTFSSSVSRIRSIIDIAEQIGRKIVLLGSSLKRVVSVAIDVGIIK-KDQLFLSDESFGLYPREQLIVIATGSQGEPRSALAQLSRGEMRNVKLAEKDTVIFSSRAIPGNEVAIGHIKNRLVEQGVRVIAEDAECPVHVSGHPYPNDLKRMYQWIRPQVLVAIHGEPLHLVAHKELALQ…	LGGISEIGRNMTVFELRG----RLLIIDCGVLFPGHNEPGVDLILPDIRHIEDRLEDVEALVLTHAHEDHIGAIPFLLKMRPDIPVVGSAFTLALVEAKCREHRITPRF--IRVTEGERSTHGPFECEYFAVNHSIPDALAIAVHTEAGTILHTGDIKLDPLPPDRRPTDLPGLSGLGDRGVDLFLVDSTNSEVPGVGPSESEIAPTLNRLIETARGRVIVACFASNVARVQQIIDASVAHGRRVALVGRSMVRNMGIARELGFLEVDDRDLINVEAANELAPQRVVLITTGTQGEPMAALSRMARGDHRQITLTPDDLVILSSSLVPGNEEAVYGIIDSLAKVGTRVVT-NTHARVHVSGHAYAGELLYLYNAVRPRNVMPVHGTWRHLRANAGLAAK…	1e-83	273	697	542	31.73	172	355	290	7	15	53.51	44562	1	3VIGS3MR2ATLVYFGEYLGRSGP-S-S-R-KRWLILMI5SL2KGDHDNLE5VIFL3TRFH1MEKDERRLKENDLVME1ILFVIL7YI2LIHPDF1WLSKFMLR-PHDVI2YVAG1PA1ATILGA1LV3RCVRYEEH1VISTKPKRIFP-C-1SRFVQTAE1DEKRVSDTVH1AP1SEIC1SYVFRA6EDTAML1LIVAIVRHSTPEVA1NT1VL4WI3DPDLAPIPLDGRDRVP2KLDPSG1CSAGIL1NDER1IVLDALLFMLCV4ASMERVEP1TVCGIP2KSGE1KAKPNTILYNDRILMIKENT1KR1CR1LI1TATC1SA1SN1SA1IVRQSQ3IAASEVQAIH2KRIVVA1LV1SR1LMKV1VNVMSGVI1IRDEVL1IFILKE-VKD1QRL…	N/A	N/A	N/A	N/A	N/A	N/A	N/A	N/A	96	96
CLIBASIA_02855	0	CLIBASIA_02855	Q8Z6N0#PHI:624#SsaN#28901#Salmonella_enterica#reduced_virulence	Q8Z6N0#PHI:624#SsaN#28901#Salmonella_enterica#reduced_virulence	0	0	Q8Z6N0#PHI:624#SsaN#28901#Salmonella_enterica#reduced_virulence	Q8Z6N0#PHI:624#SsaN#28901#Salmonella_enterica#reduced_virulence	54	432	49	425	KNSDNLGQVIRINLDIVYICPVGIGEEISLGDLVFHWGRFRISP-SACWCGRVINALGKPIDG---DDSLGKGDLSMEIMSKVPPAMNRQRVEKGFKTGIRVIDIFTPLCHGQRIGVFAGSGIGKSTLLSMFARSDCFDKVIISLVGERGREVREFIEDYLGDNLKK-SVVVVATSDESPILRKMAPLTAVTIAEYFSSKGDNVLLILDSITRFAHSIREIATNSGELPVARGYPTSVFSELPRLLERIGPSEKEKGNITAVISVLVDGDNHNDPIADSVRSILDGHIVLNRSLAEEGRYPPVDPLASVSRLADKAWSADEKKLVSSLTHLIHRFEETRDIRLIGGYRPGVDLILDKAVHQVPIIYDFLKQSPSDLSSEDVFQE	KPGEELAEVVGINGSKALLSPFTSTIGLHCGQQVMALRRRHQVPVGEALLGRVIDGFGRPLDGCELPDVCWKDYDAMP-----PPAMVRQPITQPLMTGIRAIDSVATCGEGQRVGIFSAPGVGKSTLLAMLCNAPDADCNVLVLIGERGREVREFIDFTLSEETRKRCVIVVATSDRPALERVRALFVATTIAEFFRDNGKRVVLLADSLTRYARAAREIALAAGETAVSGEYPPGVFSALPRLLERTGMGEK--GSITAFYTVLVEGDDMNEPLADEVRSLLDGHIVLSRRLAERGHYPAIDVLATLSRVFPVVTSHEHRQLAAILRRRLALYQEVELLIRIGEYQRGVDTDTDKAIDTYPDICTFLRQSKDEVCGPELLIE	2e-83	265	676	384	41.93	161	211	221	5	12	57.55	44562	1	1NPSGDENE1GAQE1IVRG2LGDSIKVAYLILCS1VFGTISGTEIEGILSHLC1DQLQ1FMHAWLGR1FRRHIQSV1-VSGAECAWLCL4NDAGLF1KR1IL2-C-E-LDP1SVLCGW1GDDYLDSA1EPI-M-S-K-V-4NV2RPVIETKQGPFLKM4VA2ISFVTAPTLCCGHE3IV1VI1ASGASP1IV6SA1FLACRNSADPCDFA1KCVNIVILSV1VI11EDDFYT1GSDENELTKR1-RSC1VI6ERSPPAILLE1KVMR1PLLFTV1VT4YF1SRSDKN1DKNR1LV1ILLA2IL2FY1HRSAIA4TLNASA2LTPA1ASRGGE2TPSG3EA7IT1PMSG2E-K-1NS3VFIYST3DE2NDHM1DE1IL2SE3IL7NS1SR3ER1RH2PAV…	N/A	N/A	N/A	N/A	N/A	N/A	N/A	N/A	87	87
CLIBASIA_03990	0	CLIBASIA_03990	D2TI55#PHI:9334#Map#67825#Citrobacter_rodentium#effector_(plant_avirulence_determinant)	D2TI55#PHI:9334#Map#67825#Citrobacter_rodentium#effector_(plant_avirulence_determinant)	0	0	D2TI55#PHI:9334#Map#67825#Citrobacter_rodentium#effector_(plant_avirulence_determinant)	D2TI55#PHI:9334#Map#67825#Citrobacter_rodentium#effector_(plant_avirulence_determinant)	11	263	2	254	SINIYTPEELENIRSACNVVARCLDSLTPIIKPGTTTEEID----DFVLKFGMENNAIPATLNYRGYKKSCCTSINHVICHGIPSN-KQLREGDIVNVDVTYVVNGWHGDSSRMYPVGKIKRAAERILQVTYESLYKGIAAVKLNANIEDIGKAIQRYAHSERYSVVEVFCGHGIGKSFHEKPEILHFYDPLYPSVGTFQEGMVFTIEPMLNVGGSSAKVLSDGWTAVTRDRSLSAQYEHTIGITKAGCEIFTLSPNN	AISIKTPEEIEKMRVAGRLAAEVLEMIEPYIKPGVSTGELDRLCNDYIVN---EQHAISACLGYHGYPKSVCISINEVVCHGIPDDAKLLKDGDIVNIDVTVIKDDYHGDTSKMFIVGKPTILGERLCRVTQESLYLALRMVKPGIRLRTLGAAIQKYAEGEGFSVVREYCGHGIGRGFHEEPQVLH-YDADDGGV-VLQPGMTFTIEPMLNAGDYRIRTMKDGWTVKTKDRSLSAQYEHTIVVTENGCEILTLRKDD	4e-83	252	644	258	50	129	119	172	5	10	66.67	44562	1	SA1NS1YK4LI1NKIM1SV1CGNRVLVA1RECV1DESMLITE1IY4TVTS1EG1IL1-R-L-C-N1FYVILVKNF-G-M-1NQNH2PS1TC1NG1RH2KP2CV1TI3HE1IV5SDND-A1QL1RKED5VI3YVVIVKNDGDWY3ST1RK1YFPI3IPKTRIALAG2ILLCQR2YQ4KLGAILARAM2LPNGAINRILERDTIL1KA3RK2HESG1RGYF3ERVEFY6KRSG3KE1EQIV2F-2PALDYDPGSG1G-TVFL1EP2VT8VA1GDSYSRAIKRVTLMSK4AVVK1RK12GVIV1KEAN4FL2SRPKNDND	N/A	N/A	N/A	N/A	N/A	N/A	N/A	N/A	93	93
CLIBASIA_00840	0	CLIBASIA_00840	I1RBF3#PHI:9056#FgTRR_(FGSG_00871)#5518#Fusarium_graminearum#reduced_virulence	I1RBF3#PHI:9056#FgTRR_(FGSG_00871)#5518#Fusarium_graminearum#reduced_virulence	0	0	I1RBF3#PHI:9056#FgTRR_(FGSG_00871)#5518#Fusarium_graminearum#reduced_virulence	I1RBF3#PHI:9056#FgTRR_(FGSG_00871)#5518#Fusarium_graminearum#reduced_virulence	6	317	3	318	SKILIIGSGPAGYTAAIYAARAMLKPVIIAGS-----DLGGQLMITESIENYPGFATSIRGDWLMEQMRQQAENFGTKIIQDLVVSVDLDRHPFLVETQ-SGDLWH-ADAVVIATGSEVKWLRLESEKKFQGFGVSACATCDGF--FYKNKDVIVVGGGNTAAEEALHLAKIARRVTIVHRRSSLRSEKILQEKLFLQSNIDFLFDTEVVDVIGSIPEPPLFPSVSGVRLHNKKEGNFFERNVDGIFIAIGYKPNTKIFRHQLKMTNTNYIWTMPDSTATSIPGIFAAGDVADERYRQAITAAAMGCMAALEVEHYLSIHQ	SKVVIIGSGPAAHTAAVYLARAELKPVLYEGFMANGIAAGGQLTTTTEVENFPGFPKGIMGGELMDNMRAQSERFGTEIITDTVATLDLSSRPYKYTTEFSPEETHTAETVILATGASARRLNLPGEDKYWQNGVSACAVCDGAVPIFRNKPLFVIGGGDSAAEEATFLTKYASHVTVLVRRDVLRASRTMANRLLNHPKCTVLFNSGATEIRGG--EDGL---MSHLVVKNNKTGEEKVHEANGLFYAIGHDPATTLVKGQVDMDEDGYIKTIPGTTYTNVEGVFAAGDVQDKRYRQAITSAGTGCMAALEAEKFLADHE	5e-83	256	654	321	43.93	141	166	197	6	14	61.37	44562	1	2IVLV7GAYH3IV1AL3ME4ILIYAE1SF-M-A-N-G-IDALA4MTIT1ETSEIV2YF3APTKSG1RM1DGWE2EDQN2QA1AS1NR3KE2QT1LT1VASTVL2DSRSHR1FYLKVYET1QE-F1GPDELEWT1-T1DEAT1VIIL3SAESVAKRWR1RN1EPSG1KD1FYQWGQFN6TV3FA-V-PFIYFKR2DPVLIF1VI3NDTS5LTHF1AT1IY1RSRH2IVVLHV2SDSV2SAESKRITLMQAENKR1FLLNQHSPNKICDTFV2DNTSEGVAVTDEVIIR1SGI-P-1PDPG1F-P-S-VM1GHVLRVLVHK1KN1ET1NEFEFKEVRHNEVADN1IL1IY3YHKD1NA1KTILFVRKHG1LVKD1TDNETDNG2WK1MI1DGST1AY1SNI…	N/A	N/A	N/A	N/A	N/A	N/A	N/A	N/A	97	97
CLIBASIA_00230	0	CLIBASIA_00230	V5VGK1#PHI:11207#ClpB#470#Acinetobacter_baumannii#reduced_virulence	V5VGK1#PHI:11207#ClpB#470#Acinetobacter_baumannii#reduced_virulence	0	0	V5VGK1#PHI:11207#ClpB#470#Acinetobacter_baumannii#reduced_virulence	V5VGK1#PHI:11207#ClpB#470#Acinetobacter_baumannii#reduced_virulence	136	428	105	398	AVNFISHGISKRKEFANFQSKLNVDGSS--------AGSDGEGFVNDYQAKTDLNLFPALSAYCVDLTEKVKKGKVDILVGRHEEINRTIQILCRRSKNNPLYVGDPGVGKTAIAEGFAKQIVDGMVPDILLGARIFSLDMGNLIAGTRYRGDFEERIKKIVKEIESY-ANAILYIDEIHTLVGAGSASGISVDASNLLKPALSSGAVRCIGSTTYSEYRQFFEKDKALVRRFQKIDVSEPSIEDAIEIVKGIKPYFEEHHQLRYSKEAIRAAVQLSVRHFTSRKLPDKAIDVIDEAGASQI	STDWVLLGLAETGETKNILSAVGVTPDSLRKVIENIRGSD-KVMSNNHEDQRD-----SLNKYTIDLTERALSGKLDPVIGRDDEIRRTIQVLSRRTKNNPVLIGEPGVGKTAIVEGLAQRIVNGEVPEGLKNKRVLSLDLGSLLAGAKYRGEFEERLKAVLKDLAKHEGEIILFIDELHTLVGAGKGDG-AMDAGNMLKPALARGELRCVGATTLDEYRQYIEKDAALERRFQKVLVDEPSVEDTIAILRGLKEKYATHHGVQILDSAIIAAAKMSHRYITDRQLPDKAIDLIDEA-ASRI	7e-83	283	725	302	48.01	145	140	211	6	17	69.87	44562	1	ASVTNDFWIVSLHL1ILSAKERTKG1FTAK1FIQL1KALVNG1DTGPSD1-L-R-K-V-I-E-N-IAR3G-EKGVFMVS1DNYHQEADKQTR1L-N-L-F-P-AS1SNAK1CTVI4KRVAKLKS2VL1IPLVVI2HDED2NR4IV1CS2ST4LVYLVI1DE8AV2FL1KQQR2DN1ME2DEIG1LKGNAK1IVFL3ML1NS1IL2TARK3DE4IL1KAIVVL1EDILEASKYH-EAGNEAI2YF3IL7SKAGSD1I-SAVM2SG1LM5SASR1AEVL2IV1SA2YLSD4FYFI3KA2VE5IVDL1SD3IV2AT1EA1VLKR1IL1PEYKFYEAET2QGLVRQYISLKDES2RI2VAQKLM1VH1HYFI1SD1KQ7VL4G-2QR1	N/A	N/A	N/A	N/A	N/A	N/A	N/A	N/A	76	37
CLIBASIA_02915	0	CLIBASIA_02915	Q9I697#PHI:9281#GshB#287#Pseudomonas_aeruginosa#reduced_virulence	Q9I697#PHI:9281#GshB#287#Pseudomonas_aeruginosa#reduced_virulence	0	0	Q9I697#PHI:9281#GshB#287#Pseudomonas_aeruginosa#reduced_virulence	Q9I697#PHI:9281#GshB#287#Pseudomonas_aeruginosa#reduced_virulence	7	310	5	310	IAIQMNHISTVKVKEDSTFAIALEAQVRGYQIFHYTPDQLYMRDSKIYANTQPLSLDEKKEQYYSLGEEKIIDLSQMDVILIRQDPPFNMHYITSTYLLEKI-NPETLIVNNPFWIRNSPEKIFVTEFSELMPPTLISRDITQITRFYLEMKDIIIKPLYGNGGTGVFRITLGDRNFSSLIEMLFEKYPEPLMIQSYLPQIRDGDKRILLLNGKPVG-AVNRIPSEVDNRSNIHAGGKAELTKLTKIDLDICKRIGESLRERGLFFTGIDVIGDYITEINVTSPTCIREIHRNGGENVASLFWDGI	LGIVMDPIARINFKKDSSLAMLLAAQARGWSLFYMEQQDLYQKAGVARGRMRPLKVFNDASRWFELEAESDQPLHELDVILMRKDPPFDNEFVYSTYLLEQAERAGALVVNRPQSLRDCNEKFFATQFTQCTPPTMVSRRSDILREFAAEHRDIILKPLDGMGGSSIFRHREGDPNLSVILETLTQHGSQQIMAQRYLPEIKDGDKRILMIDGEPVPYCLARIPAQGETRGNLAAGGRGVAQPLSERDRWIAAEVGPHLRERGLLFVGLDVIGDYLTEINVTSPTCIREIDQAFDTRIGDKLMDAI	2e-81	251	641	306	41.5	127	177	188	2	2	61.44	44562	1	ILAG1QV1NDHP1SATRVIKNVF1EK2TSFL1IMAL1EA2VA2YWQSIL1HYYMTEPQDQQD2MQRKDASGKVIAYRAGNRTMQR2SKLVDFENKDKAESQRYWYFSE1GEEA1KSIDIQDP1SHQEML4IM1QK4NDMNHEYFIVTY6KQIA-ENRPAEGTA1IV2NR1FQWSIL1NDSCPN2IF1VA1EQ1STEQLCMT3LMIV2DRISTDQIILTRRE1YALA1MHKR3IL3YD1NM2TSGSVI2IHTRLE2RP1FL1SVLIIL1MT1FTEQKHYGPSEQPQLI1IA1SR3QE1RK7LMLIND1KE2GP-YACVLNA3SAEQVGDENT1SG1ILHA3KRAGEVLATQKP1TSKEIR1LRDW1CAKAREIV1EPSH6FL1TV1IL6IL14HDRQNAG…	N/A	N/A	N/A	N/A	N/A	N/A	N/A	N/A	96	96
CLIBASIA_01335	0	CLIBASIA_01335	B9XXL6#PHI:8011#Rhpa#210#Helicobacter_pylori#reduced_virulence	B9XXL6#PHI:8011#Rhpa#210#Helicobacter_pylori#reduced_virulence	0	0	B9XXL6#PHI:8011#Rhpa#210#Helicobacter_pylori#reduced_virulence	B9XXL6#PHI:8011#Rhpa#210#Helicobacter_pylori#reduced_virulence	3	371	22	383	FADLGLSPKVVCAVLDAGYVKPTPIQIKTIPLVLQRHDVCGIAQTGTGKTASFVLPMLTILEKGRARVRMPRTLILEPTRELAAQVADNFEKYGKNYNLTVALLIGGIPFEAQNKKLERGADVLICTPGRILDHFNRGKLLMNNIEILVIDEADRMLDMGFIPYIQNITSLVPFTRQTLLFSATMTDELQKVSENFLQNPKRIEVNTPSSTAETIEHCFVATYAQYSKKCALLQQLLQSQDTMKNGIIFCNQKKNVVNLCHSLEKQGFSVCAIHGNIDQRSRMKILSNFKEGTIQLMVASDLAARGLDIPDVGHVFNFDVPNRAENYIHRIGRTGRAGRHGKAFTLVAKEDIKHIDAIEKLIEKKVDWL	FNDLGLKESVLKSVYEAGFTSPSPIQEKAIPAVLQGRDVIAQAQTGTGKTAAFALPIINNLKNNHTI----EALVITPTRELAMQISDEIFKLGKHTRTKTVCVYGGQSVKKQCEFIKKNPQVMIATPGRLLDHLKNERIHKFVPKVVVLDESDEMLDMGFLDDIEEIFDYLPSEAQILLFSATMPEPIKRLADKILENPIKIHIAPSNITNTDITQRFYVINEH--ERAEAIMRLLDTQ-APKKSIVFTRTKKEADELHQFLASKNYKSTALHGDMDQRDRRASIMAFKKNDADVLVATDVASRGLDISGVSHVFNYHLPLNTESYIHRIGRTGRAGKKGMAITLVTPLEYKELLRMQKEIDSEIELF	9e-81	260	665	369	38.21	141	221	214	3	7	57.99	44562	1	1AN4SKPEKS1VLCKAS1LYDE2YFVTKS1TS3IE1TA2LA3RGHR2CIGAIQ9SA1VA2MILITNIN1EKKNGNRHATRIV-R-M-P-RETA1IVLIET6AM1VIAS1NEFIEF1YL2NHYTNRLTTKVTAVLCLVIY2IQPSFVEKAK1NCKEKFLIEKRKGNAPDQ1LM1CA4IL3FLNKRNGEKRLILHMKNFNVIPEKIVLV1IL2AS1RE6ILPDYD1QENE1TFSDLYVL1FSTERA1TI7TPDEEPLIQKKRVLSAEDNKFI1QE2KIRK1EHVINATPPSSNSI1ANETTD1ETHQCR1VYAVTIYNAEQHY-S-KEKRCAAELALIQMQR2QDST1D-TAMP1NKGS1IV1CTNRQT2NEVAVDNE1CHHQSF1EAKSQKGNFYSKVSC…	N/A	N/A	N/A	N/A	N/A	N/A	N/A	N/A	79	79
CLIBASIA_01270	0	CLIBASIA_01270	A0A0F6AZ26#PHI:7212#STM14_1003#28901#Salmonella_enterica#reduced_virulence	A0A0F6AZ26#PHI:7212#STM14_1003#28901#Salmonella_enterica#reduced_virulence	0	0	A0A0F6AZ26#PHI:7212#STM14_1003#28901#Salmonella_enterica#reduced_virulence	A0A0F6AZ26#PHI:7212#STM14_1003#28901#Salmonella_enterica#reduced_virulence	6	314	1	311	MPVLLLADYNQENLSEQTARIVTAAQKISHDIHVLVLGDNIENIAQQAARIQGVTQVIVAQSTIFRHKLAGPV----SDFVVSIARDYKTIMASANAMGKDILPRVAAMLDVMQVSEVIEIISPKIFKRPSYTGNIIQTIETTDTYQIITIRAIAFPPAPKAEKVASIHKISAEVLEKYISNTRFIKEERTSLSPTDLSSAKIVISGGKSFGSMENFHKLLLPLAKKLGAAIGATRDAVDAGFAPNDWQIGQTGVTVSPELYIAAGISGAIQHISGMKDSKVIVSINTDENAPIFKISDYFIVGDIFKILPEI	MASLVIAEHNGNTLLPSTLSTITAAKAINSDIDILMLGYGIESIAVKASHIQGISTVFVADSPLFEHLLAENVEKQISYFLNSGKNHYQSILFPASSFGKNCAPRLAAKLDVSQISDITRVIDQHTFERPIYAGNAIATVHSDDEYKVITVRPTSFAAAVAEDEGKAPIEFTEVVLGS--DQVKFISQHVNKSNRPDLQSARVVVSGGRGVGSAQAFKELVDNLADKLGAAVGASRAAVDAGYAPNDYQIGQTGKIVAPQLYIALGISGAIQHLAGMKESGVIVAINKDPDAPIFSIADYGLVADIFKAVPEL	2e-80	249	636	313	46.01	144	163	208	2	6	66.45	44562	1	1PAVS1LVLI1DEYH1QGENNT1SLEPQS1ALRSITVI3QKKA1SNHS2HDVI1VM2DYNG2NS2QVQK1ASRH3VITSQT1IF2QD1TPIL1RE1KL2GEPN1-E-K-Q-I1DY1VLVN1IGAKRNDH1KQTS1MLAFSP1NSASMF2DNICLA2VL2MK3MS1VI1EDVIITERIV1SDPQKHIT1KE2SI1TA2IA1QA1IVEHTSTD1TE1QKIV2IV1APITAS1PAPA1PVKAAEEDKEVGAKSAIPHIKEIFSTAEEV2EGKSY-I-SDNQTVRK2KSEQEHRVTNSKLSSNPRTP2SQ2KRIV1IV3KRSGFV2MAEQNA1HKKE1LVLDPN2KD5IV2TS1DA5FY4WY6VKTI1SA1EQ4AL8ILSA3DE1KG3SA2TK1EPND4KS1S…	N/A	N/A	N/A	N/A	N/A	N/A	N/A	N/A	97	97
CLIBASIA_00840	0	CLIBASIA_00840	A7EKQ2#PHI:8883#SsTrr1_(SS1G_05899)#5180#Sclerotinia_sclerotiorum#reduced_virulence	A7EKQ2#PHI:8883#SsTrr1_(SS1G_05899)#5180#Sclerotinia_sclerotiorum#reduced_virulence	0	0	A7EKQ2#PHI:8883#SsTrr1_(SS1G_05899)#5180#Sclerotinia_sclerotiorum#reduced_virulence	A7EKQ2#PHI:8883#SsTrr1_(SS1G_05899)#5180#Sclerotinia_sclerotiorum#reduced_virulence	6	314	3	307	SKILIIGSGPAGYTAAIYAARAMLKPVIIAGSDLGGQLMITESIENYPGFATSIRGDWLMEQMRQQAENFGTKIIQDLVVSVDLDRHPFLVETQSGDLWH--ADAVVIATGSEVKWLRLESEKKFQGFGVSACATCDGF--FYKNKDVIVVGGGNTAAEEALHLAKIARRVTIVHRRSSLRSEKILQEKLFLQSNIDFLFDTEVVDVIGSIPEPPLFPSVSGVRLH----NKKEGNFFERNVDGIFIAIGYKPNTKIFRHQLKMTNTNYIWTMPDSTATSIPGIFAAGDVADERYRQAITAAAMGCMAALEVEHYLS	SKVVIIGSGPAAHTAAVYLARAELKPNGIAA---GGQLTTTTDVENFPGFPKGIGGQELMDNMRAQSERFGTQIITETVAKVDLSKRPFKYWTEWDDKTEHTADSIIIATGASARRLGLPGEEKYWQNGISACAVCDGAVPIFRNKPLVVIGGGDSAAEEAMFLTKYGSHVTVLVRKDHLRASKTMAKRLLANKKVTVKFNTVGGEITGND---------KGLMTHMVFKNVVTGEEEKAEANGLFYAVGHDPATALFKEQIDTDSEGYIVTKPGTSYTNVEGVFAAGDVQDKRYRQAITSAGSGCIAALEAEKFLA	6e-80	248	634	317	42.27	134	163	194	5	20	61.2	44562	1	2IVLV7GAYH3IV1AL3ME3VNIG2GAS-D-L-4MTIT1ETSDIV2YF3APTKSG1RG1DQWE2EDQN2QA1AS1NR3KQ2QTDELT1VASK3DSRKHR2LKVYEW1QESWGD1LKWTHE-H-T2ASVIVI4SAESVAKRWR1RG1EPSG1KE1FYQWGQFN1VI4TV3FA-V-PFIYFKR2DPVLIV1VI3NDTS5LMHF1AT1IYAGRSRH2IVVLHV1RKSDSH2SAES1ITLMQAEKKR1FLLAQNSKNKIVDTFVLK1DN1EVVGVGDEVIIT1SNIDP-E-P-P-L-F-P-S-V-SK1VLRMLT1-M-V-F-K1KVKVET1NEFEFEEKRANEVADN1IL1IY1IV1YHKD1NA1KAIL1RKHE1LIKDMTTDNSTENG2WV1MK1DGSTTSA…	N/A	N/A	N/A	N/A	N/A	N/A	N/A	N/A	96	96
CLIBASIA_02130	0	CLIBASIA_02130	A0A0F6B5T0#PHI:10084#STM14_RS15355#28901#Salmonella_enterica#unaffected_pathogenicity	A0A0F6B5T0#PHI:10084#STM14_RS15355#28901#Salmonella_enterica#unaffected_pathogenicity	0	0	A0A0F6B5T0#PHI:10084#STM14_RS15355#28901#Salmonella_enterica#unaffected_pathogenicity	A0A0F6B5T0#PHI:10084#STM14_RS15355#28901#Salmonella_enterica#unaffected_pathogenicity	2	269	1	268	INQILEPFTYNYMNTAIWMSTLIGCVCGLLSAYLILKGWSSIGNGISHAIFPGIVVCHRLNIPLSVGATISGMLATGIMVKIKETTKLREDVAIAVVYIIFYSFAMFMLSLSPSAVYVENIFLGNTLSMSRSDTIQVLIITFSVACIVYMKWKDFVLLFFDERHAHSVGINVKLLKMLFFSLLTITIVIGFQTVGILLVIATVITPGATAKLMSKSFGTYLVSSSLLGATSSFLGSYISYFLDCSPGGIIVIIETSLFLLCLFFFSKQ	MNWLVEPFGYQYMLNAMWVSAMVGGLCAFLSCYLMLKGWSLIGDALSHSIVPGVAGAWMLGLPFSLGAFLSGGLAAGSMLFLNQRSRLKEDAIIGLIFSSFFGVGLFMVSLNPMSVNIQTIILGNVLAIAPADIAQLAIIGAVSLTILLLKWKDLMVVFFDETHARSIGLNPGRLKLLFFTLLSVSTVAALQTVGAFLVICLVVTPGATAWLLTDRFPRLLMIAVVIGSLTSFLGAWLSYWLDGATGGIIVVMQTLLFITAFIFAPKH	1e-79	244	623	268	43.66	117	151	184	0	0	68.66	44562	1	IM1QWILLV3TG1NQ2NLTN1IM1MV1TALMIV1CGVL1GALF2AC2IM5SL2NDGAIL2AS1FV2IVVAVGCAHWRM1NGIL1LF1VL2TFIL2MG2TA1IS1VLKFILKNEQTRTSKR1RK2VAAI1AGVLVIYFISIS1YFSGFVAGML2LV2SN1SMAS1YNVIEQNT1FI3TV1SAMISARPSA1TIIA1VLLA2TGFASVVSALCT1VLYLML4FLVMLVLV4RT2HR1VI1IL1VPKGLR2ML3ST2TSIVTSIT1IAGAFL4IALF3ACTL1IV6KW1MLSTKDSR1GPTRYL1VMSISASVLVLI1ASTLST4SAYWIL2FW2CGSAPT5IVIMEQ1SL2LILTCALFFI1FASP1QH	N/A	N/A	N/A	N/A	N/A	N/A	N/A	N/A	98	98
CLIBASIA_03870	0	CLIBASIA_03870	E0SMW9#PHI:8569#ClpA_(Dda3937_02363)#204038#Dickeya_dadantii#reduced_virulence	E0SMW9#PHI:8569#ClpA_(Dda3937_02363)#204038#Dickeya_dadantii#reduced_virulence	0	0	E0SMW9#PHI:8569#ClpA_(Dda3937_02363)#204038#Dickeya_dadantii#reduced_virulence	E0SMW9#PHI:8569#ClpA_(Dda3937_02363)#204038#Dickeya_dadantii#reduced_virulence	528	844	417	735	QEVVTSDNIANIVSRWTGIPVDKMLESDREKFLRIETEISKSVIGQSAAVESVSNALRRFRAGLQDPQRPMGSFMFLGPTGVGKTELVKSLARLLFDDENSMIRIDMSEYMEKHSVSRLIGSPPGYVGYEEGGALTEAVRRHPYQVVLFDEIEKAHSDVHNILLQVLDDGRLTDSQGRTVDFRNTLIIMTSNLGAEY-------LIEDGDSVHDKVMGIVRSAFKPEFLNRLDEIILFEKLRKEDMAKIVRIQLGRVLSLIKERNISMDFDDQVIDWLSCRGYDPSYGARPLKRVIQRYIQNPLAERVLSQTISDGDSIEVFVD	KKTVNVADIEAVVARIARIPEKTVSASDRDVLRNLGDRLKMLVFGQDKAIEALTEAIKMSRAGLGHERKPVGSFLFAGPTGVGKTEVTVQLAKAL---DIELLRFDMSEYMERHTVSRLIGAPPGYVGYDQGGLLTDAVIKHPHSVLLLDEIEKAHPDVFNLLLQVMDNGTLTDNNGRKADFRNVIVVMTTNAGVRETQRKSIGLIQQDNS--SDAMEEIKKVFTPEFRNRLDGIIWFNHLSAEVIQQVVDKFIVELQAQLDAKGVSLEVSEEARNWLAEKGYDKAMGARPMARVIQENLKKPLANELLFGSLVDGGSVKVELD	4e-79	272	696	324	42.59	138	174	209	3	12	64.51	44562	1	QKEKVT1TNSVDAND1AENAIV1SA1WITAGR2VEDKKTMVLSEA3EDKVFLLRRNILEGTDERILSKKMSL1IF2SDAK1VI1SAVLSTNE1LIRKRMFS4QGDHPEQRRK1MV3ML1LA9LVVTKVSQ2RKLA1F-D-D-EDNISEMLIL1IF7KR1ST6SA7EDEQ2AL2ED2RIRK2YHQS1VL1FL7SP2HF1IL4LM1DN1RT3SNQN2TKVA4TVLIIVIV2ST1LA1AVERYE-T-Q-R-K-S-I-G2EQDQGDDN1V-H-DSKDVA1GEIEVIRKSKAV1KT3LR4EG2LW1ENKH1RSKA1DVMIAQKQIV1RDIKQFLIGVREVLLQSALQILKDEARKNGIV1MLDEFVDSDEQEVAIRDN2SACERK3PKSAYM4LMKA4REYNIL…	N/A	N/A	N/A	N/A	N/A	N/A	N/A	N/A	67	37
CLIBASIA_00785	0	CLIBASIA_00785	P63786#PHI:3005#ClpP#1280#Staphylococcus_aureus#reduced_virulence	P63786#PHI:3005#ClpP#1280#Staphylococcus_aureus#reduced_virulence	0	0	P63786#PHI:3005#ClpP#1280#Staphylococcus_aureus#reduced_virulence	P63786#PHI:3005#ClpP#1280#Staphylococcus_aureus#reduced_virulence	16	206	1	191	LGLVPMVVEQTNRGERSYDIYSRLLKERIVFVTGQIEDHMATLICAQLLFLEAENPQKEISLYINSPGGVVTAGMAIYDTMQFIKPPISTFCMGQAASMGSLLLSAGEKGMRFALPNARILLHQPSGGFSGQASDIERHAQDIVKIKRRLNEIYVKNCGKTYEEVEKTLDRDHIMSASEACDWGVVDKVLM	MNLIPTVIETTNRGERAYDIYSRLLKDRIIMLGSQIDDNVANSIVSQLLFLQAQDSEKDIYLYINSPGGSVTAGFAIYDTIQHIKPDVQTICIGMAASMGSFLLAAGAKGKRFALPNAEVMIHQPLGGAQGQATEIEIAANHILKTREKLNRILSERTGQSIEKIQKDTDRDNFLTAEEAKEYGLIDEVMV	5e-78	234	598	191	54.97	105	86	149	0	0	78.01	44562	1	LMGN1VI1MT1VI1QT6SA9ED2VIFMVLTGGS2ED1HNMV1TNLS1CVAS5EQ1EQNDPSQE1ED1SY8VS4MF5MI1FH3PDIVSQ1FI1MI1QM6LF2SA2EA2MK7REIVLMLI3SL2FASQ3STDE2RIHA1QNDH1VL1ITKRRERK2ER1YLVSKENRCT1KQTSYI1EKVIEQ1TDLT3HNIFMLST1SE2CKDEWY1VLVI1KE1LMMV	N/A	N/A	N/A	N/A	N/A	N/A	N/A	N/A	88	88
CLIBASIA_00840	0	CLIBASIA_00840	A0A0A2L0F6#PHI:8723#PeTrx#27334#Penicillium_expansum#unaffected_pathogenicity	A0A0A2L0F6#PHI:8723#PeTrx#27334#Penicillium_expansum#unaffected_pathogenicity	0	0	A0A0A2L0F6#PHI:8723#PeTrx#27334#Penicillium_expansum#unaffected_pathogenicity	A0A0A2L0F6#PHI:8723#PeTrx#27334#Penicillium_expansum#unaffected_pathogenicity	6	314	4	322	SKILIIGSGPAGYTAAIYAARAMLKPVIIAG-----SDLGGQLMITESIENYPGFATSIRGDWLMEQMRQQAENFGTKIIQDLVVSVDLDRHPFLVETQSGD------LWHADAVVIATGSEVKWLRLESEKKFQGFGVSACATCDGF--FYKNKDVIVVGGGNTAAEEALHLAKIARRVTIVHRRSSLRSEKILQEKLFLQSNIDFLFDTEVVDVIGSIPEPPLFPSVSGVRLHNKKEGNFFERNVDGIFIAIGYKPNTKIFRHQLKMTNTNYIWTMPDSTATSIPGIFAAGDVADERYRQAITAAAMGCMAALEVEHYLS	SKVVIIGSGPGAHTAAIYLSRAELQPVLYEGMLANGTAAGGQLTTTTDVENFPGFPNGIGGAELMDNMRAQSERFGTEIITETISKLDLSSRPFKMWTEWNDDEGSEPVRTADAVIIATGANARRLNLPGEETYWQNGISACAVCDGAVPIFRNKPLYVIGGGDSAAEEAMFLAKYGSSVTVLVRKDKLRASKVMADRLLAHPKCKVRFNTVATEVIGETKPNGL---MTHLRVKDVVSNTEEVVEANGLFYAVGHDPANALVKGQVELDDEGYIVTKPGTSFTNIEGVFACGDVQDKRYRQAITSAGSGCVAALEAEKFLS	5e-78	243	621	322	40.68	131	175	195	4	16	60.56	44562	1	2IVLV6AGGAYH5ALAS2ME1KQ2ILIYAE1-M-L-A-N-GSTDALA4MTIT1ETSDIV2YF3APTNSG1RG1DAWE2EDQN2QA1AS1NR3KE2QTDELTVIVSSKVL2DSRSHR2LKVMEW1QESWGN1-D-E-G-S-E-PLVWRHT4VI4SAENVAKRWR1RN1EPSG1KEKTFYQWGQFN1VI4TV3FA-V-PFIYFKR2DPVLIY1VI3NDTS5LMHF3IYAGRSRS2IVVLHV1RKSDSK2SAES1IVLMQAEDKR1FLLAQHSPNKICDKFVLR1DN1EVVAVTDE3SEITPKEPPNPG1F-P-S-VMSTGHVL1LVHKNDKVKVESGNNTFEFEEVRVNEVADN1IL1IY1IV1YHKD1NATNKAILFVRKHG1LVKEMLTDNDTENG2WV…	N/A	N/A	N/A	N/A	N/A	N/A	N/A	N/A	96	96
CLIBASIA_00280	0	CLIBASIA_00280	Q9K033#PHI:8623#Cab_(NMB0789)#487#Neisseria_meningitidis#unaffected_pathogenicity	Q9K033#PHI:8623#Cab_(NMB0789)#487#Neisseria_meningitidis#unaffected_pathogenicity	0	0	Q9K033#PHI:8623#Cab_(NMB0789)#487#Neisseria_meningitidis#unaffected_pathogenicity	Q9K033#PHI:8623#Cab_(NMB0789)#487#Neisseria_meningitidis#unaffected_pathogenicity	18	255	2	246	VEIKFLNKWYGNFHALRDINLNVLRGERVIIAGPSGSGKSTLIRCINHIEKHQAGEI-IINGIPLNDDI------RNIHEVRRDVGMVFQHFNLFSNLSVLENCTLGPIWVRKMPKKDAEELAMHYLNKVKIADKSHRSSSLLSGGESQRAAIARSLCMQPKIMLFDEPTSALDPEMVKEVLDIMIELAEEGMTMVCVTHEMGFARQVADRVVFMDQGQIVEQNSPEEFFNNPQHERTQAFLSQI	IKIRNIHKTFGENTILRGIDLDVCKGQVVVILGPSGSGKTTFLRCLNALEMPEDGQIEFDNERPLKIDFSKKPSKHDILALRRKSGMVFQQYNLFPHKTALENVMEGPVAVQGKPAAQAREEALKLLEKVGLGDKVDLYPYQLSGGQQQRVGIARALAIQPELMLFDEPTSALDPELVQDVLDTMKELAQEGWTMVVVTHEIKFALEVATTVVVMDGGVIVEQGSPQDLFDHPKHERTRRFLSQI	1e-77	237	605	245	50.2	123	115	166	2	7	67.76	44562	1	VIEK1KRFNLINH1WTYF1NEFNHTAI2DG1ND1ND1LCRK1EQRV1IV1AL7ST1LFIL2IL1HAIL1KMHPQEAD1EQ1-EIFID1GEIR2NKDI1IF-S-K-K-P-S-KRHND1HLEAVL2DKVS5HQFY3SPNHLKSTVA3CVTMLE2IVWA1RQKGMK1KAKADQ1ER1LE1MLHKYL1NE2KGILAG2SVHDRLSYSPSYLQ4EQSQ2AVAG3SA1CAMI2KEIL13ML1KQED3IT1IK3EQ2MW3CV4MIGK2RLQE2DTRT2FV2QG1QV4NG2EQEDFL1NDNH1QK4QRAR5	N/A	N/A	N/A	N/A	N/A	N/A	N/A	N/A	93	93
CLIBASIA_02135	0	CLIBASIA_02135	A0A0F6B5T1#PHI:10085#STM14_RS15360#28901#Salmonella_enterica#unaffected_pathogenicity	A0A0F6B5T1#PHI:10085#STM14_RS15360#28901#Salmonella_enterica#unaffected_pathogenicity	0	0	A0A0F6B5T1#PHI:10085#STM14_RS15360#28901#Salmonella_enterica#unaffected_pathogenicity	A0A0F6B5T1#PHI:10085#STM14_RS15360#28901#Salmonella_enterica#unaffected_pathogenicity	4	276	2	274	FLHYVLLPLTFPAIQNSFIITVIVVIPMSVLSCFIILKNQSFAGEAISHSVLPGIVLSHMAGIPLEIGAFIAGMICTLSAGYLKEKSYFQEDLVLSIVFSGMFAIGIILILKVHSSLHFSHILLGDMLGISKSDIITTAFFAFISISFLI-LKKNDLLLMIFDPMHAHSMQIPIKLLHYNFLIVLSLIIVISLKSIGIILPPAVLVLPGATAFLLSKHHTTMILLSVIISVVCTLVGIYISFFINSAAAPTVVILMAIFFVVVYAYSIIINKRT	FLTTLLEPFQFDFMVNALMVSVIVAIPCALLSVFLVLKGWALMGDAMSHAVFPGVVLAYIVGIPLAIGAFIAGLFCAIATGYLDDNSRIKRDTVMGIVFSGMFGAGLVLYVSIQSEVHLDHILFGDMLGVSLGDIVQTSVIA-LGIALIIGLKWKDLLLHAFDPHQAKASGLNTTLLHYGLLCMIALTIVATLKSVGIILSISLLIAPGAIAILLTRRFARALGLAVSLSVITAFAGVYLSFYLDSAPAPTIVVLFAIVFIAAFIYATWRDRRN	1e-77	239	609	274	44.16	121	151	184	2	2	67.15	44562	1	2HTYTVL1LE1LFTQ1PDAFIMQV1SAFLIMIVTS3VA2MCSAVL2CV1ILIV2NGQWSAFLAM1ED1IM2SA1LF2IV2SAHYMIAV4EA7MLIF1TALISAAT3KDEDKN1YRFIQKER1LT1LMSG7AGIA1ILIV1IYLVKSVIHQ1SELV1FLSD3LF5IV1KLSG2IVTQ1ASFVFI1F-ILSG1SAFLLI1-G2KWNK4MHIA3MHHQ1HKSAMSQGILPNITKT4NGFL1ICVMLISA1IT2IAST3IV4PSPIASVL1VILA3TI1FI2STKRHRHFTATRMAILLG1SA1ISIL2VICTTALFVA1IV1IL2FYILND2AP3VI1IV1MF2FV1VIVAVAYFAI1SAITIWIRNDKR1TN	N/A	N/A	N/A	N/A	N/A	N/A	N/A	N/A	99	99
CLIBASIA_00840	0	CLIBASIA_00840	G4MY64#PHI:6674#MoTRX2#318829#Magnaporthe_oryzae#reduced_virulence	G4MY64#PHI:6674#MoTRX2#318829#Magnaporthe_oryzae#reduced_virulence	0	0	G4MY64#PHI:6674#MoTRX2#318829#Magnaporthe_oryzae#reduced_virulence	G4MY64#PHI:6674#MoTRX2#318829#Magnaporthe_oryzae#reduced_virulence	6	314	3	315	SKILIIGSGPAGYTAAIYAARAMLKPVIIAG-----SDLGGQLMITESIENYPGFATSIRGDWLMEQMRQQAENFGTKIIQDLVVSVDLDRHPFLVETQ-SGDLWH-ADAVVIATGSEVKWLRLESEKKFQGFGVSACATCDGF--FYKNKDVIVVGGGNTAAEEALHLAKIARRVTIVHRRSSLRSEKILQEKLFLQSNIDFLFDTEVVDVIGSIPEPPLFPSVSGVRLHNKKEGNFFERNVDGIFIAIGYKPNTKIFRHQLKMTNTNYIWTMPDSTATSIPGIFAAGDVADERYRQAITAAAMGCMAALEVEHYLS	SKVVIIGSGPAAHTAAIYLARANLKPVMYEGFMANGTAAGGQLTTTTDVENFPGFPKGIGGQELMDAMREQSSRFETEIISETVAKVDLSSRPFKYCTEWSPEVMHTADTLVIATGASARRLGLPGEDKYWQNGISACAVCDGAVPIFRNKPLFVIGGGDSAAEEAMFLTKYGSHVTVLVRKDKLRASSIMAKRLLSHPKVTVKFNSVGVEVKGG--EDGL---MSHMVIKDVVTGKEETLEANGLFYAIGHDPATQLVKGQLETDEEGYIVTKPGTPLTSVEGVFACGDVQDKRYRQAITSAGSGCMAAMDAEKFLA	3e-77	241	615	318	42.77	136	168	194	6	14	61.01	44562	1	2IVLV7GAYH5AL3MN4IMIYAE1-F-M-A-N-GSTDALA4MTIT1ETSDIV2YF3APTKSG1RG1DQWE2EDQA2QE1ASESNR1GE1KE2QSDELT1VASK3DSRSHR2LKVYEC1QE-W1GPDELVWM1-T2ATVL5SAESVAKRWR1RG1EPSG1KD1FYQWGQFN1VI4TV3FA-V-PFIYFKR2DPVLIF1VI3NDTS5LMHF1AT1IYAGRSRH2IVVLHV1RKSDSK2SAESKS1LMQAEKKR1FLLSQHSPNKIVDTFVLK1DNTSEVVG1DE1IK1SGI-P-1PDPG1F-P-S-VM1GHVMRVLIHKNDKVKVET1NKFEFEETRLNEVADN1IL1IY3YHKD1NA1KQILFVRKHG2KEMTTDNETENG2WV1MK1DGSTTPAL2IVP…	N/A	N/A	N/A	N/A	N/A	N/A	N/A	N/A	96	96
CLIBASIA_03870	0	CLIBASIA_03870	E0SMW9#PHI:8569#ClpA_(Dda3937_02363)#204038#Dickeya_dadantii#reduced_virulence	E0SMW9#PHI:8569#ClpA_(Dda3937_02363)#204038#Dickeya_dadantii#reduced_virulence	0	0	E0SMW9#PHI:8569#ClpA_(Dda3937_02363)#204038#Dickeya_dadantii#reduced_virulence	E0SMW9#PHI:8569#ClpA_(Dda3937_02363)#204038#Dickeya_dadantii#reduced_virulence	150	403	155	410	DSVNAEQ--GFDALKKYCRDLTEEARNGKLDPVIGRDDEMRRAIQVLSRRTKNNPVLIGDPGVGKTAIIEGLASRIINGDIPESLKGKRLMALDMGALIAGAKFRGEFEERLKSLLCEIRSEDGEIILFIDELHVLVGAGKTDGA-MDASNLLKPSLARGELHCIGATTLDEYRKYIEKDPALARRFQSLLVGEPTVTDTISILRGLKERYEQHHKVRISDSALVSAAVLSNRYITDRFLPDKAIDLMDEASARVRM	NPVNEEQAGGEERMENFTTNLNQLARVGGIDPLIGRDSELERTIQVLCRRRKNNPLLVGESGVGKTAIAEGLAWRIVQGDVPEVMADCTLYSLDIGSLLAGTKYRGDFEKRFKALLKQL-EQDKSSILFIDEIHTIIGAGAASGGQVDAANLIKPLLSSGKIRVIGSTTYQEFSNIFEKDRALARRFQKIDITEPSVEETVQIINGLKPKYEAHHDVRYTAKAIRAAVELAVKYINDRHLPDKAIDVIDEAGARCRL	5e-77	266	681	257	50.97	131	122	184	3	4	71.6	44562	1	DNSP2AE2-A-G1FEDEARLMKEKNYFCTRTDN1TNEQEL2NV1KGLI2VL4DS1MLRE1AT4SC2TR4VL1IV1DEPS7IA4SW2IVNQ2IV2SVLMKAGDKCRT1MYAS2MI1AS1IL2AT1FY2ED2EK1LF1SA2CKEQILR-SEEQ1GKESIS6LI1VTLIVI3KATADS1AG-QMV2SA2LI2SL1ASRS1EKLIHRCV2AS2LYDQ1YFRSKNYIIF3PR7SKLILDVIGT2TS1TEDE1IVSQ1LIRN3EPRK2QA2KD2IYSTDASK1LIVRSA1AVVE1SANVRK2TN2FH7LVMI3SG2VC1ML	N/A	N/A	N/A	N/A	N/A	N/A	N/A	N/A	67	30
CLIBASIA_04775	0	CLIBASIA_04775	P9WHH9#PHI:7582#Rv0462_(lpdC)#1773#Mycobacterium_tuberculosis#increased_virulence_(hypervirulence)	P9WHH9#PHI:7582#Rv0462_(lpdC)#1773#Mycobacterium_tuberculosis#increased_virulence_(hypervirulence)	0	0	P9WHH9#PHI:7582#Rv0462_(lpdC)#1773#Mycobacterium_tuberculosis#increased_virulence_(hypervirulence)	P9WHH9#PHI:7582#Rv0462_(lpdC)#1773#Mycobacterium_tuberculosis#increased_virulence_(hypervirulence)	3	460	4	454	YDVAVVGGGPAGYACAIKAAQLKNKVAIIEKEKTYGGTCLNIGCIPSKALLHASEMYSHIAKEAGDLGINIASCHLDLKKMMSYKKS--IVESNTQGINFLLKKNKIITYHGSARIVSNNKILVK-GSSSEETIEAKNIVIATGSEASGLPGMS-----IDFDEQVIVSSTGALSFSSVPKNLLVIGAGVIGLELGSVWTRLGSCVKIIEHSGTILNGMDKEIAAHCLKIMSKQGMNFQLNSKVSSVKKVKGKAQVVYRSTDDEPIN-IEADAVLVAAGRRPYTKGLGLEEIGINIDHRGCIEIGGQFQTSISTIYAIGDVVRGPMLAHKAEDEGIAVAEIISGQKGHV--NYGIIPSVVYTHPEVASIGKTEEQLKCEKKSYKVGKFPFSANGRARSM…	YDVVVLGAGPGGYVAAIRAAQLGLSTAIVEP-KYWGGVCLNVGCIPSKALLRNAELVHIFTKDAKAFGI---SGEVTFDYGIAYDRSRKVAEGRVAGVHFLMKKNKITEIHGYGTFADANTLLVDLNDGGTESVTFDNAIIATGSSTRLVPGTSLSANVVTYEEQILSRE--------LPKSIIIAGAGAIGMEFGYVLKNYGVDVTIVEFLPRALPNEDADVSKEIEKQFKKLGVTILTATKVESI--ADGGSQVTVTVTKDGVAQELKAEKVLQAIGFAPNVEGYGLDKAGVALTDRKAIGVDDYMRTNVGHIYAIGDVNGLLQLAHVAEAQGVVAAETIAGAETLTLGDHRMLPRATFCQPNVASFGLTEQQARNEGYDVVVAKFPFTANAKAHGV…	7e-77	249	636	469	35.61	167	273	248	10	29	52.88	44562	1	3AV1VL1GA2AG2AVCA2KR4KGNLKSVT2IV1KPE-1TYYW2TV3IV9HRANSA1MLYVSHHIIFAT1ED1GKDALF2N-I-A-1CGHELVDTLFKDKYMGMISA1KDKR1-R-KIVVA1SGNRTVQA1IVNH2LM5ITTEYI2SYAGRTIFVASDNA1KTIL2KD-LGNSDSGSGET1TSIVETAFKD1IAVI5ESATSRGLLV2MT1-L-S-A-N-VIVDTFYDE2VIILVSSRSET-G-A-L-S-F-S-S-VL2NSLILIVIIA3VA2LM1LF1SY1WLTKRNLY1SVCD1KT1IV1HFSLGPTRIA1NPGNME1KAEDIVASAKHECILE1IQMFSK1QL1MVNTFIQLLTNAST2SE1VIK-K-VAKD1KGAS2VTYVRTSV1DK1EGPVIAN…	N/A	N/A	N/A	N/A	N/A	N/A	N/A	N/A	98	98
CLIBASIA_01635	0	CLIBASIA_01635	Q66A26#PHI:3134#PykF#633#Yersinia_pseudotuberculosis#reduced_virulence	Q66A26#PHI:3134#PykF#633#Yersinia_pseudotuberculosis#reduced_virulence	0	0	Q66A26#PHI:3134#PykF#633#Yersinia_pseudotuberculosis#reduced_virulence	Q66A26#PHI:3134#PykF#633#Yersinia_pseudotuberculosis#reduced_virulence	4	466	1	467	LRRIKIISTLGPSSFSEDVINRLHEEGTDVFRINMSHTSHDKMCELIKKIRAVELRSRRPIGILIDLQGPKFRVGKFANSK-VDLTEGQIFTLDNKDSLGSSDRVM-LPHPEIFASIKIGDRLLIDDGRVKLCVQEKGIGFIKCKVIAGISIADRKGISFPDTFLTTQALTQKDREDLHAALQTCE--VDWVALSFIQSADDLLEIRKIISQN---KIGLMSKIEKPRAIEYASEIIQLSDAVMVARGDLGVEMALELIPGIQKKLIRIARQLGKPVVIATQMLESMVTSPFPTRAEVSDVATAVFEEADAIMLSAETASGSYPVDAVRTMSLVASSAER--DSSWLEMRSLRRIEPNETGADVISSAARQIAETLRLSAIFCYTASGATGLRAARERP…	MKKTKIVCTIGPKTESEEMLTNLLNAGMNVMRLNFSHGDYAEHGQRIKNLRAVMAKTGKKAAILLDTKGPEIRTMKLEGGKDAALVAGQTFTFTTDQSVVGNDKIVAVTYPGFAADLKIGNTVLVDDGLIGMEVIEVTEHTVVCKVLNSGDLGENKGVNLPGVSIQLPALAEKDKGDL---IFGCEQGVDFVAASFIRKRSDVLEIREHLKAHGGEHIQIISKIENQEGLNNFDEILEASDGIMVARGDLGVEIPVEEVIFAQKMMIEKCNRARKVVITATQMLDSMIKNPRPTRAEAGDVANAILDGTDAVMLSGESAKGKYPLESVTIMATICERTDRVMPSRIESLNDNRKMRITE----AVCRGAVETAEKLEAKVIVVATGGGKSAKSVRKYFP…	8e-77	249	637	474	32.7	155	301	256	8	18	54.01	44562	1	LMRKRKIT2IVSC1LI2SKSTFE2DEVMILNTRN1HLENEA1TMDN1FM1IL1MF2TGSDHYDAKEMHCGEQLR2KNIL3EMLARKSTRGRKPKIAGA2IL1LTQK2KEFI1VTGM1FLAENGSG1-DVADA1TVEA2IT2LFDTNTKDDQ1LVGVSGSN1RKVIMV-ALVPTHY1EGIFFA1SDIL3DNRTLV1IV3RLVIKGLMCE1QI1KVGTIEGHFTIVKV3ILANGSIGSDILAGDERN2IVSNFL1DGTVFSLITQTLQP2TAQE2RKEG2H-A-A-LIQFTG2-Q-G2WF2LA3QRSKARDS1LV4KEIHILSKQANH-G-G-EKH1GQLIMI4KNPQREAGILENYNAFSD2ILQELA2AGVI10MIAPLV1LEIVPIGFIA2KMLM1RE…	N/A	N/A	N/A	N/A	N/A	N/A	N/A	N/A	96	96
CLIBASIA_00840	0	CLIBASIA_00840	Q5RZ66#PHI:2846#TRR1#5207#Cryptococcus_neoformans#lethal	Q5RZ66#PHI:2846#TRR1#5207#Cryptococcus_neoformans#lethal	0	0	Q5RZ66#PHI:2846#TRR1#5207#Cryptococcus_neoformans#lethal	Q5RZ66#PHI:2846#TRR1#5207#Cryptococcus_neoformans#lethal	6	314	3	316	SKILIIGSGPAGYTAAIYAARAMLKPVIIAGS-----DLGGQLMITESIENYPGFATSIRGDWLMEQMRQQAENFGTKIIQDLVVSVDLDRHPFLVETQSGD----LWHADAVVIATGSEVKWLRLESEKKFQGFGVSACATCDGF--FYKNKDVIVVGGGNTAAEEALHLAKIARRVTIVHRRSSLRSEKILQEKLFLQSNIDFLFDTEVVDVIGSIPEPPLFPSVSGVRLHNKKEGNFFERNVDGIFIAIGYKPNTKIFRHQLKMTNTNYIWTMPDSTATSIPGIFAAGDVADERYRQAITAAAMGCMAALEVEHYLS	SKVVIIGSGPGGHTAAIYLARANLEPVLYEGMLANGFAPGGQLTTTTDVENFPGFPEGVTGTEMMDKFRAQSERFGTKIITETVARVDLSVRPFKYWTEGEEEEHEFMTADTIILATGASAKRLFLPGEETYWQSGISACAVCDGAVPIFRQKPLAVIGGGDSAAEEATYLTKYGSHVYVLVRRDELRASKIMAKRLTSHPKVTVLWNTVATEAKGD------GEVLTSLTIKNTKTGETGDLPVNGLFYAIGHEPATSLVKSQVELDSDGYIKTVPGTSQTSVHGVFAAGDVQDKKYRQAITSAGSGCIAALEAERLIS	9e-77	240	613	320	40.62	130	173	194	4	17	60.62	44562	1	2IVLV6AG1YH5AL3MN1KE2ILIYAE1SM-L-A-N-G-FDALP4MTIT1ETSDIV2YF3APTESGIVRT1DTWELM1EDQKMF1QA1AS1NR6QTDELT1VASR3DSRVHR2LKVYEW1QESGGEDE-E-E-H-ELFWMHT2ATVIVIIL3SAESVA1WR1RF1EPSG1KEKTFYQWGQFS1VI4TV3FA-V-PFIYFKRNQ1DPVLIA1VI3NDTS5LTHY1AT1IYAGRSRH1TYIVVLHV2SDSE2SAES2LMQAEKKR1FTLSQHSPNKIVDTFV1FWDN1EVVAVTDEVAIK1SDI-P-E-P-P-L-FGPESVVLSTGSVLRTLIHK1KT1ET1NEFTFGEDRLNP1DN1IL1IY3YHKE1NA1KSILFVRKHS1LVKEMLTDNSTDNG2WK1…	N/A	N/A	N/A	N/A	N/A	N/A	N/A	N/A	96	96
CLIBASIA_00230	0	CLIBASIA_00230	P9WPD1#PHI:9919#ClpB#1773#Mycobacterium_tuberculosis#reduced_virulence	P9WPD1#PHI:9919#ClpB#1773#Mycobacterium_tuberculosis#reduced_virulence	0	0	P9WPD1#PHI:9919#ClpB#1773#Mycobacterium_tuberculosis#reduced_virulence	P9WPD1#PHI:9919#ClpB#1773#Mycobacterium_tuberculosis#reduced_virulence	184	491	158	461	FPALSAYCVDLTEKVKKGKVDILVGRHEEINRTIQILCRRSKNNPLYVGDPGVGKTAIAEGFAKQIVDGMVPDILLGARIFSLDMGNLIAGTRYRGDFEERIKKIVKEIESYANAIL-YIDEIHTLVGAGSASGISVDASNLLKPALSSGAVRCIGSTTYSEYRQFFEKDKALVRRFQKIDVSEPSIEDAIEIVKGIKPYFEEHHQLRYSKEAIRAAVQLSVRHFTSRKLPDKAIDVIDEAGASQILQPLSKRRKFITEKDIKKTIASMNRSIHTTSFSRDDDSVLSNLEKNLGTVVYGQEEAIKKLSS	YQALQKYSTDLTARAREGKLDPVIGRDNEIRRVVQVLSRRTKNNPVLIGEPGVGKTAIVEGLAQRIVAGDVPESLRDKTIVALDLGSMVAGSKYRGEFEERLKAVLDDIKNSAGQIITFIDELHTIVGAGATGEGAMDAGNMIKPMLARGELRLVGATTLDEYRKHIEKDAALERRFQQVYVGEPSVEDTIGILRGLKDRYEVHHGVRITDSALVAAATLSDRYITARFLPDKAIDLVDEA-ASRLRMEIDSRPVEIDE--VERLVRRLE--IEEMALSKEEDEASAERLAKLRSELADQKEKLAELTT	1e-76	266	680	309	43.04	133	170	211	4	6	68.28	44562	1	FYPQ2SQAK1CSVT3EAKRVAKRKE2VL1IPLVVI2HDEN2NR1TVIV1IV1CS2ST4LVYLVI1DE8AV2FL1KQQR2DA1MD2DEIS1LRGDAKRT1FVSA2ML1NSLMIV2TSRK3DE4IL1KAIVVLKDED1EKSNYS1NGAQ1LI-TYF3IL2LI4SAATSGGEIGSAVM2SG1LMLI2AM1SASR1AEVL1CLIV1SA2YLSD3QKFHFI3KA2VE4KQIVDY1SG3IV2AT1EG1VLKR1IL1PDYRFY1EV2QGLV1YISTKDES1ILRV2VAQT2VD1HYFI1SA1KF7VLIV3G-2QRILLRQMPELISDKS1RPKVFE1TD1K-D-IVKEKRTLIVARSRMLNER-S-1HETETMSAFL1RKDEDE1SEVALSSANELRELKANK1GR…	N/A	N/A	N/A	N/A	N/A	N/A	N/A	N/A	72	39
CLIBASIA_00840	0	CLIBASIA_00840	Q4WQJ0#PHI:2537__PHI:10626#TRR1__TrxR_(Afu4g12990)#746128#Aspergillus_fumigatus#lethal__unaffected_pathogenicity	Q4WQJ0#PHI:2537__PHI:10626#TRR1__TrxR_(Afu4g12990)#746128#Aspergillus_fumigatus#lethal__unaffected_pathogenicity	0	0	Q4WQJ0#PHI:2537__PHI:10626#TRR1__TrxR_(Afu4g12990)#746128#Aspergillus_fumigatus#lethal__unaffected_pathogenicity	Q4WQJ0#PHI:2537__PHI:10626#TRR1__TrxR_(Afu4g12990)#746128#Aspergillus_fumigatus#lethal__unaffected_pathogenicity	9	313	26	340	LIIGSGPAGYTAAIYAARAMLKPVIIAG-----SDLGGQLMITESIENYPGFATSIRGDWLMEQMRQQAENFGTKIIQDLVVSVDLDRHPFLVETQSGD------LWHADAVVIATGSEVKWLRLESEKKFQGFGVSACATCDGF--FYKNKDVIVVGGGNTAAEEALHLAKIARRVTIVHRRSSLRSEKILQEKLFLQSNIDFLFDTEVVDVIGSIPEPPLFPSVSGVRLHNKKEGNFFERNVDGIFIAIGYKPNTKIFRHQLKMTNTNYIWTMPDSTATSIPGIFAAGDVADERYRQAITAAAMGCMAALEVEHYL	IVIGSGPAAHTAAIYLSRAELKPVLYEGMLANGTAAGGQLTTTTDIENFPGFPDGIGGAELMENMRKQSIRFGTEVITETISRVDLSSKPFKLWTEWNDGPDKEPACTADAVIIATGANARRLNLPGEETYWQNGISACAVCDGAVPIFRNKPLYVIGGGDSAAEEAMFLAKYGSSVTVLVRRDKLRASKAMAKRLLAHPKVTVRFNTVATEVLGEKKPNGL---MTHLRIKNTVTGEEEIVDANGLFYAVGHDPATALVKGQIDLDEDGYIITKPGTSYTSREGVFACGDVQDKRYRQAITSAGSGCIAALEAEKFI	1e-76	241	616	318	41.51	132	170	191	4	16	60.06	44562	1	LIIV6GAYH5ALAS2ME4ILIYAE1-M-L-A-N-GSTDALA4MTIT1ETSD3YF3APTDSG1RG1DAWE3QN2QK1ASEINR3KEIV1QTDELTVIVSSR3DSRSHK2LKVLEW1QESWGN1-G-P-D-K-E-PLAWCHT4VI4SAENVAKRWR1RN1EPSG1KEKTFYQWGQFN1VI4TV3FA-V-PFIYFKR2DPVLIY1VI3NDTS5LMHF3IYAGRSRS2IVVLHV2SDSK2SAES1IALMQAEKKR1FLLAQHSPNKIVDTFVLR1DN1EVVAVTDE1IL1SEIKPKEPPNPG1F-P-S-VMSTGHVL1LIHK1KTKVET1NEFEFEEIRVNDVADN1IL1IY1IV1YHKD1NA1KAILFVRKHG1LIKDMLTDNETDNG2WI1MK1DGSTTSA…	N/A	N/A	N/A	N/A	N/A	N/A	N/A	N/A	95	95
CLIBASIA_04210	0	CLIBASIA_04210	E9R5E2#PHI:2513#GFA1#746128#Aspergillus_fumigatus#lethal__loss_of_pathogenicity	E9R5E2#PHI:2513#GFA1#746128#Aspergillus_fumigatus#lethal__loss_of_pathogenicity	0	0	E9R5E2#PHI:2513#GFA1#746128#Aspergillus_fumigatus#lethal__loss_of_pathogenicity	E9R5E2#PHI:2513#GFA1#746128#Aspergillus_fumigatus#lethal__loss_of_pathogenicity	185	608	267	694	GEMFVGSDVTALTLLTDKVTYMEDGDWAIIRNSGLTIY---DSQGYEIERPIQIVQIAPFLIGKGNYRHFMEKEIYEQPEAISRVLSHYINLSDHTI-IPNIFNY--DFANISGLLVSSCGTSYLAGLVGKFWFERLARLKVEIDVSSEFRYRDFVYSSKWASLFISQSGETADTLASLRYMRTQG-LTIGSLVNVLESTIARESDFIFPIKAGPEIGVASTKAFTCQLLVLVIMAIYAGKVRGYINEEQERELIRSLVEIPRKMFDVLQNIYSQIEKLCCGLAKCQ-TLLYVGRGSSYPLALEGALKIKEISYLHAEGYAAGELKHGPIALITEGTFVIAIAPYDRFFQKTLSNIQEIVTRGGRVIFITDEEGLKRQDFPSIET--IVLPSMGEIVSP…	AEFFLSSDPSAIVEHTKKVLYLEDDDIAHVHEGQLNIHRLTKDDGTSNVRAIQTIELELQEIMKGKFDHFMQKEIFEQPESVVNTMRGRLDVANKQVTLGGLRQYISTIRRCRRIIFIACGTSYHSCMAVRGVFEELTEIPISVELASDFLDRQAPVFRDDTCVFVSQSGETADSLMALRYCLERGALTVG-IVNVVGSSISLLTHCGVHINAGPEIGVASTKAYTSQFVAMVMFALSLSEDRASKQKRRE-EIMDGLSKISGQFREILK-LNEPIKQMCAKFFKDQKSLLLLGRGSQFPTALEGALKIKEISYLHCEAVMSGELKHGVLALVDENLPIIMILTRDNIFSKSLNAYQQVIARGGRPIVICNHDD---PEFSSAQTEKIEVPKTVDCLQG…	1e-76	258	660	434	37.79	164	254	255	10	16	58.76	44562	1	GA1MF1VLGS2VPTS1LITVLELH1DK2TL1ML2GD1WI1IHIVRHNESGGQ1TN1YH-R-L-TDKSDQD1YTESINEV1PA2ITVIQEILAEPLFQLE1GM2NKYFRD3EQ3YF4ASIVSVRNVTLMSRHGYRILNDLVSADNHKTQIV-TILPGNGILFRNQ1-I-SDTFIARNRICSRGRLILIVFSISA5LHASGCLMVAGVKRFGWV2RE1ATRELIKPVIESIVDEVLSA1ED1RLYD1DQFAVPYVSFSRKDWDATSCLV1IV8TS1AMSA3MCRLTEQR1-A2IV1S-LI3LVEG1TS1ASRLELSTDHFCIGFVPH1KN12FY1CS1LFLVVALM1IMMF1ILYSALGSKEVD1GAYSIKNQEKERQR1R-1LIIMRDSG1VSEK1PSRG…	N/A	N/A	N/A	N/A	N/A	N/A	N/A	N/A	99	70
CLIBASIA_03560	0	CLIBASIA_03560	Q3IZC2#PHI:10842#RSp0930#305#Ralstonia_solanacearum#effector_(plant_avirulence_determinant)	Q3IZC2#PHI:10842#RSp0930#305#Ralstonia_solanacearum#effector_(plant_avirulence_determinant)	0	0	Q3IZC2#PHI:10842#RSp0930#305#Ralstonia_solanacearum#effector_(plant_avirulence_determinant)	Q3IZC2#PHI:10842#RSp0930#305#Ralstonia_solanacearum#effector_(plant_avirulence_determinant)	5	425	24	424	SLLKMGYLLEDLGRPQDRLPPVIHIGGTNGKGSVASFSQRLLETSGLSVHVHTSPHLIRWNERFRLGVKGGRGRLVEDVELLDVFRRVRRVKSAQNLTIFELSIATALVLFSKYPADCAIIEVGLGGSLDATNIIEKVAVSVITSISLDHEKILGNTVSAIAKDKSGIIKPGCPVVIGHQVYDEVREILVSKAEKMGCPYNVYGDDFYAFEKNKCLVYQDKISQTNLTVLGLVGEHQYINAATAICAVQMAGFTLEKECINAALQSVQWFGRLQKITEGPLLNKLPDHSEVWIDGGHNPNAGLVVSKEISKLKGSSNKPFYLVIGMVEGKKYGRYLEAFVELSPIVLSVSLICRGRERQSISITPKVLMQEAKKLGFQAMACSSMIEALSRVRKINEEL…	TLDRVHRLLQALGHPERSLPPVIHIAGTNGKGSTQAMIRAGLEAQGLKVHAYTSPHLARFHERIRLA-----GSLISEPALAALLDECLAANGPEPITFFEITTCAAFLAFARTPADYTLLEVGLGGRLDATNVVEDPRLTIVTPVSIDHQQYLGETLPEIAAEKAGILKRRVPCVVGPQQATAL-EVIEARAARLGAPLLAHGQQWQVWEERGRTVFQDEAGLLDLPLPVLPGPHQIQNAGAALMALRHLGAP-EAAC-EAALTRADWPARMQRLRQGPLPRSAPG-IELWLDGGHNPAGGAAVAATLSRM---APRPTHLICGMLNTKDVKGYMR---PLAPHVTRLHAVSIPGEANTLPA--EATATAARAAGIAACTAPSVADALA---SIAAEN…	3e-76	245	626	421	35.87	151	250	233	9	20	55.34	44562	1	ST1LDKRMVGHYR2EQDA2RH1QEDRRS7GA7VTAQSAFMSIQRRALG2TASQ2SK2VAHY5IA1WFNH2FI2GAV-K-G-G-R-1RS1VIESDEVPEA1LADAVLFLRDREVCRLRAVAKNSGAPQENPLI1IF2LISTITACTA1LFVLLA1SAKRYT3CYATILIL6SR5IVIV1KDVPARVLSTVIIV1SPIV1LI2EQKQIY2NE1VLSPAE2KADE1SA2IL1PRGRCV1VC1IV1HP1VQYADTEAVLR-1IVLIVESAKR1EAKRML1CA1YLNLVAYH1DQDQFWYQAVFW1KENRKGCRLT1YF2KEIASGQLTLND1TPVLLPGV1VP1EP2YIIQ2AGTA1ILCM1VLQRMHAL1FATPL-1KAEA1I-NE3QTSRVAQD1FPGA1L…	N/A	N/A	N/A	N/A	N/A	N/A	N/A	N/A	98	98
CLIBASIA_03025	0	CLIBASIA_03025	P0A9X1#PHI:11007#ZnuC#562#Escherichia_coli#reduced_virulence	P0A9X1#PHI:11007#ZnuC#562#Escherichia_coli#reduced_virulence	0	0	P0A9X1#PHI:11007#ZnuC#562#Escherichia_coli#reduced_virulence	P0A9X1#PHI:11007#ZnuC#562#Escherichia_coli#reduced_virulence	7	240	1	234	ITPLISLSNTSFHKNGYKILQDINFTIKPNEIVTLIGPNGSGKSTIAKLITGIIKPTIGSVKRHPQLIVGYVPQKVTIENTLPLSLMRFMTLSMPSSRDDVLQILDRVNLIGKYNRNIKDLSGGEFQRALLAKALLRKPNLLVLDEPLQGIDFPGELSLYELITSVRQSTGCGILLISHNLHMVMASTDTVICLNNRICYQGPPQTIKDNAEYIRLFGTRATEILAIHNHKHDH	MTSLVSLENVSVSFGQRRVLSDVSLELKPGKILTLLGPNGAGKSTLVRVVLGLVTPDEGVIKRNGKLRIGYVPQKLYLDTTLPLTVNRFLRLRPGTHKEDILPALKRVQAGHLINAPMQKLSGGETQRVLLARALLNRPQLLVLDEPTQGVDVNGQVALYDLIDQLRRELDCGVLMVSHDLHLVMAKTDEVLCLNHHICCSGTPEVVSLHPEFISMFGPRGAEQLGIYRHHHNH	7e-76	232	592	234	45.73	107	127	163	0	0	69.66	44562	1	IM1PS1IV2SE1TV1FVHSKFNGGQYRKRIV1QS1IVNSFLTEIL2NGEK1VL2IL4SA4ILAVKRLVIVTL1ILIVKT1TDIE1SVVI2HNPGQK1IRVI6VLTYILEDNT4STLVMN2MLTR1SRMPPGSTSHRKDE1VI1QPIA1DK2NQLAIGGHKLYI1RANPIMKQDK5FT2AV3KR3RNKR1NQ7LT2IV1FVPN1EQLVSA2ED2TDSQVL1QRSETLGD2IV1LMIV2ND2ML3SK2TE1IL3NHRH2YCQS1PT1QETVIVKSDLNHAP1YF1RSLM2TP1AGTA1IQ1AG1HYNR1KH1DN1	N/A	N/A	N/A	N/A	N/A	N/A	N/A	N/A	98	98
CLIBASIA_02855	0	CLIBASIA_02855	D0ZDL7#PHI:4613#EsaN#636#Edwardsiella_tarda#increased_virulence_(hypervirulence)	D0ZDL7#PHI:4613#EsaN#636#Edwardsiella_tarda#increased_virulence_(hypervirulence)	0	0	D0ZDL7#PHI:4613#EsaN#636#Edwardsiella_tarda#increased_virulence_(hypervirulence)	D0ZDL7#PHI:4613#EsaN#636#Edwardsiella_tarda#increased_virulence_(hypervirulence)	60	398	59	394	GQVIRINLDIVYICPVGIGEEISLGDLVFHWG-RFRISPSACWCGRVINALGKPIDGDDSLGKGDL-SMEIMSKVPPAMNRQRVEKGFKTGIRVIDIFTPLCHGQRIGVFAGSGIGKSTLLSMFARSDCFDKVIISLVGERGREVREFIEDYLGDNLK-KSVVVVATSDESPILRKMAPLTAVTIAEYFSSKGDNVLLILDSITRFAHSIREIATNSGELPVARGYPTSVFSELPRLLERIGPSEKEKGNITAVISVLVDGDNHNDPIADSVRSILDGHIVLNRSLAEEGRYPPVDPLASVSRLADKAWSADEKKLVSSLTHLIHRFEETRDIRLIGGYRPG	AEVVAIEGDQALLSPYHAPLGLANGMLVTPSGAQARIGVGEALLGRVIDALGQPMDGCAPPQAAQWRSLE--SPAPDPMQRAPIDTLLPMGVRAIDAALSVGVGQRLGIFSPAGCGKSTLLGMLAAHSQVDVVVLALIGERGREVREFIEQIMSPELRARSVVILATSDRPALERIKAADTATVIAEYFRDRGHHVLLLVDSLTRYARAIREIALAAGEPMVSGGYPPSLYARLPRLLERAGPA--ACGSITAFYTVLV--EQKSDPLAEEVRSLLDGHIVLSRRLAEASHYPAIDILASISRVMSQVVTPQHRQAANRLRHLLATWQEIALLVRVGEYRAG	8e-76	245	625	342	42.69	146	187	208	6	9	60.82	44562	1	GAQE1IVRA1NELG1IQVAYLILCS1VYGHIAGPELEGILSALN1DM2FTHPWS1-ARQFA2SGPVSGAECAWLCL4ND3KQ1IM2DCDASPLPGQKAGADQLW-R1ML1I-M-1KPVA1PDAP1NQ1QARPVIEDKTGLFLKPTM1IV1VA2IAFATLPSLVCGHV3IL1VI1ASGPSA1IC6SG1FL1RASHDSCQFV1KV1IVILSA1VI12DQYILMGSDPNE1KR-AKR3VIVL4ERSPPAILLE1KIMK1PALD2VTTV5SRSDKR1DHNH3ILLV2IL2FY1HRSA5TLNASA2LPPM1ASRG3TP1VLFYSAER7IA2SAE-K-EAKC1NS3VFIYST3D-G-DENQHKNS2IL1DESE3IL7NS1SR3EAGSRH2PAVI1PI3VI2LVAM…	N/A	N/A	N/A	N/A	N/A	N/A	N/A	N/A	77	77
CLIBASIA_03650	0	CLIBASIA_03650	Q5NGP7#PHI:7067#KdsD#263#Francisella_tularensis#reduced_virulence	Q5NGP7#PHI:7067#KdsD#263#Francisella_tularensis#reduced_virulence	0	0	Q5NGP7#PHI:7067#KdsD#263#Francisella_tularensis#reduced_virulence	Q5NGP7#PHI:7067#KdsD#263#Francisella_tularensis#reduced_virulence	22	338	7	324	STVQCALRSIIAEKRGLSSLESSLQGELSFQFHCAV--EKIKAIKGRVVITGIGKSGHIGSKLASTLASTGTPSFFVHAAEASHGDLGMITRDDLIIVLSWSGSSDELKAILYYARRFSIPLIAITSENKSVVACHADIVLTLPKEPESCPHGLAPTTSAIMQLAIGDALAIALLESRNFSENDFYVLHPGGKLG-TLFVCASDVMHSGDSIPLVKIGCPLIDAITILSEKRFGCVAVVDEGQKLKGIITEGDIFRNFHKD-LNT-LSVEDVMIKNPKVILEDTLLTVAMQLLRQHNISVLMVVDDCQKAIGIVHFLDLLRF	SHINNAVETFRLEIETLEKLKNSI--DENFEKACEIILENNRD-KSRVIITGMGKSGHIGKKMAATFASTGTPAFFVHPGEAGHGDFGMITKNDVLIAISNSGTSSEIMGLLPMIKHLDIPIIAITSNPKSILARNSNVTLNLHVDKEACPLNLAPTSSTTATLVLGDALAIALLKAKNFSEKDFAFSHPNGALGRKLILKVENIMRKGNEIPIVKPTDNIRKAILEISDKGVGNT-LVAENNTLLGIFTDGDLRRMFEAESFNSQRAISEVMTKNPKSISKEEMAITALEKMEKYEITSLAVVDNGHNILGIVTMHDLIKL	6e-75	236	602	322	41.61	134	179	202	7	9	62.73	44562	1	1THVIQNCN1LVRESTIFIRAL1KIREGT1SESK1EKSN1LIQ-G-EDLESN1QEFKHA1AEVI-I-L1KNINKRADI-1GS2VI3IM7SK1LM1SA1LF6SA4APAG2SG3LF4RKDN1LVIL1VALI1WN2ST1DS1LIKMAGIL1YPYMAIRKRHFLSD2LI5ENNP2VIVL1CRHNASDNIVVT1TN1PHKVEDPK1SA2HLGN4TS1ATITMAQT1AVIL9EKSARK4NK2YAVFLS2GN1KA2-RTK1FIVLCKAVSEDNVI1HRSK1DNSE2LI2IPGTCDPNLIIRDK2TLIELI1ED1RGFV1CNVTA-VL1DA1GNQNKT1KL2IF1ED2ILFR1NM1HEKADE-SLF1TS-QLRSAVIESDE2IT4VS1LSEKDETELMLATIVT1ML…	N/A	N/A	N/A	N/A	N/A	N/A	N/A	N/A	93	93
CLIBASIA_03820	0	CLIBASIA_03820	Q6NGP5#PHI:11202#Rnj_(DIP1463)#1717#Corynebacterium_diphtheriae#reduced_virulence	Q6NGP5#PHI:11202#Rnj_(DIP1463)#1717#Corynebacterium_diphtheriae#reduced_virulence	0	0	Q6NGP5#PHI:11202#Rnj_(DIP1463)#1717#Corynebacterium_diphtheriae#reduced_virulence	Q6NGP5#PHI:11202#Rnj_(DIP1463)#1717#Corynebacterium_diphtheriae#reduced_virulence	11	548	126	658	LGGVGEIGMNMALYGYGSPSSRKWIMIDCGVSFPKDDLPGVDLVFPDITFIMKERKNLMAIFITHAHEDHYGALHDLWSFL-HVPVYASPFAIGLLEAKRVYERVSKKIPCISFQAGDKVDVGAFSIESVRVNHSIPETMALVIRSPVGNIVHTGDWKLDDDAILGDVTDKDSLCAIGNEGILALMCDSTNAMREGTCISEKGIKKNIYDIMKNAKGCVLVTTFSSSVSRIRSIIDIAEQIGRKIVLLGSSLKRVVSVAIDVGIIK--KDQLFLSDESFGLYPREQLIVIATGSQGEPRSALAQLSRGEMRNVKLAEKDTVIFSSRAIPGNEVAIGHIKNRLVEQGVRVI-AEDAECPVHVSGHPYPNDLKRMYQWIRPQVLVAIHGEPLHLVAHKELA…	LGGISEIGRNMTVFEYNN----RLLIVDCGVLFPSSGEPGVDLILPDFGPIENKLDKVDALVITHGHEDHIGAIPWLLKLRPDMPILASKFTMALIAAKCREHRQRPKL--IEVNEKSDINRGPFNIRFWAVNHSIPDCLGVAIKTGAGLVIHTGDVKLDQTPPDGRPTDLPALSRFGDEGVDLLLCESTNATVPGFSGSEADVAPTLKRLISDAKQRVILASFASNVYRVQAAVDAAVAAGRKVAFNGRSMIRNMEIAEKMGYLKAPRGTIVSMDDAAKMAP-HKVVLITTGTQGEPMAALSRMARREHRQITVRDGDLIILSSSLVPGNEEAVFGVMNMLSQIGATVVTGRDAK--VHTSGHGFAGELLFLYNAARPKNVMPVHGEWRHLRANKELA…	7e-75	252	644	545	30.83	168	358	289	10	19	53.03	44562	1	3VIGS3MR2ATLVYFGE1GNSNP-S-S-R-KRWLILMIIV4SL2KSDSDGLE5VIFL2IFTGFP1MEKNEKRLKDNKLVMD1ILFV3AG4YI2LIHPDW1WLSKFLLR-PHDVM1VIYL2PK1ATIMGA1LIEA2RCVRYEEH1VQSRKP1ILP-C-1SEFVQNAEGKDSKDVIDNVR1AP1SN1ERSFVWRA6EDTCMLAGLVVA1RKSTPGVA1NLIVVI4WV3DQDTAPIPLD1DRVP2KLDPSA1CSARIF1ND2IVLDAL1ML1DE4MTRVEP1TFCSIG2KAGDIVKAKPNTILYKDRILMIKSND2GQCR1LIVLTATS1SA1SN1SY1IVRQSAIAIV1IA1EVQAIA3IVVALFLN1SR1LMKI1VNVMSEVI1IEDKVM1IYIL1-A-P…	N/A	N/A	N/A	N/A	N/A	N/A	N/A	N/A	96	96
CLIBASIA_00230	0	CLIBASIA_00230	C6DC70#PHI:10595#ClpB#554#Pectobacterium_carotovorum#unaffected_pathogenicity	C6DC70#PHI:10595#ClpB#554#Pectobacterium_carotovorum#unaffected_pathogenicity	0	0	C6DC70#PHI:10595#ClpB#554#Pectobacterium_carotovorum#unaffected_pathogenicity	C6DC70#PHI:10595#ClpB#554#Pectobacterium_carotovorum#unaffected_pathogenicity	436	747	528	841	RKFITEKDIKKTIASMNRSIHTTSFSRDDDSVLSNLEKNLGTVVYGQEEAIKKLSSSIKIARAGLSDPNKPIGCYVFSGPTGVGKTEISKQLA---FALGVQLLRFDMSEYMERHAVSRLIGAPPGYVGFGQGGILADSVDQNPYSVVLLDEIEKSHPDVLNILLQIMDYGILTDQSGKKISFRNVILIMTTNAGALEMSKARIGFGS-SRNDDADKEALRNFLSPEFLNRLDSIIPFFPLSSDIIRQVVHKFIMKLELQLQEKGISFHFSEEVINWLVSHGYDVKMGARPLERIIKEHVKVPLADEILFGKLKKG	RNRVTDVEIADVLARWT-GIPVSRMLESEKEKLLRMEDELHQRVIGQNEAVEAVANSIRRSRAGLSDPNRPIGSFLFLGPTGVGKTELCKTLATFLFDSDDAMVRIDMSEFMEKHSVSRLVGAPPGYVGYEEGGYLTEAVRRRPYSVILLDEIEKAHPDVFNILLQVLDDGRLTDGQGRTVDFRNTVVIMTSNLGS-DLIQERFGERSYTEMRDMVLEVVSHNFRPEFINRIDEVVVFHPLGRAHITSIAKIQLQRLYKRLEERGYSVTITDAALDMLGEVGFDPVYGARPLKRAIQQLIENPLAQQILGGKLIPG	1e-74	261	666	316	43.35	137	173	203	4	6	64.24	44562	1	1KNFRIV1EDKVDE1KAKDTVIL1SRMWNTR-SG1HPTVTSSRFMSLREDSDEDKSEVK1SLNRLM1KDNE1GHTQVR1YI2EN2IVKEKALVSASN2KRIRAS8KR3CSYFVL1SL9ILSC1QT2-T-F-L1ADLSGDVDQALMLV1FI4YF2RK1AS4IV8FYGEQE2IY1ATDESA1DRQRNR4VI7SA4LF5IVML1YD1IR3QGSQ1KRKTIVSD3VTIVLV3TS1AL1ASL-EDMLSIKQAE1IF1FEGR1-YSTRENMDR1AMDVKL1AVLVRSNHFNLFSR3LI2LI1SEIVIVPV1FH2SGSRDAIH1RTQSVIVAHKKIFQILMQKR1EYLKQR1QE1KR1IY1FVHTFISTEDEAVAILNDWM1VGSEHV1YF1VPKVMY5EK1IA1K…	N/A	N/A	N/A	N/A	N/A	N/A	N/A	N/A	72	39
CLIBASIA_01250	0	CLIBASIA_01250	Q8P8Q1#PHI:3112#GalU#339#Xanthomonas_campestris#loss_of_pathogenicity	Q8P8Q1#PHI:3112#GalU#339#Xanthomonas_campestris#loss_of_pathogenicity	0	0	Q8P8Q1#PHI:3112#GalU#339#Xanthomonas_campestris#loss_of_pathogenicity	Q8P8Q1#PHI:3112#GalU#339#Xanthomonas_campestris#loss_of_pathogenicity	5	278	3	273	KKVRKAVFPIAGLGMRFFPISKVIPKEMLAIVDRPVIQYVIEEALEAGLTDFVFVTGRGKGLIKDYFDIQFELEQSLRKRNKKAELTLLAESIPSIGNAVFTWQYERKGLGHAVWCARNIIGDNPFALLLPDMIMSPLEGENCMANMIKLYEKEGANILAVSECDPQLSCKYGMVQVGKAIDHQVFHISDMIEKPDSSTFISNFFINGRYILHPDIFSILNDWKENEGKGEIQLTDSMRKLSERHDFLAYHFKGHTYDCGSKKGFVLANIAFAL	KRIRKAVFPVAGLGTRFLPATKTVPKEMLPIIDKPLIQYAVDEAIQAGCDTLIFVTNRYKHSIADYFDKAYELEQKLERAGKLEQLELVRHALPEGVRAIFVTQAEALGLGHAVMCAKAVVGDEPFAVLLPDDLMWN-RGDAALTQMADVAEASGGSVIAVEDVPHDKTASYGIVST-DAFDGRKGRINAIVEKPKPEVAPSNLAVVGRYVLSPKIFEYLESTGAGAG-GEIQLTDAIAELLKQEQVDAFRFEGRRFDCGAHIGLIEATVHFAL	5e-74	231	589	274	42.34	116	155	167	3	3	60.95	44562	1	1KRVI6IV4MT2FL1IAST1VTIV5AP1VI1RK1VL3VAIVED2LIEQ2LCTDDTFLVI3GN1GY1GHLS1KA4IKQAFY4SK1REKRRANG1KLAEEQ1TE1LVAREHSAIL1SEIGGVNR1VI1TVWT1YA1RAKL6WM2RKNAIVIV2NE3LV4MDIL1SWPNL-ER1EDNACAMLATNQ1IAKDLVYA1KAES1AGNSIVLI2SEEDCVDPPHQDLKSTCAKS2MI1QSVTG-KD1IF1HGQRVKFGHR1SNDAMIIV3DKSPSETVFAIP2FLFAIVNV3IV1HS1DK2SEIY1NEDSWTKGEANGEA1K-7SAMIRAKE1SLEKRQHEDQFVLD1YFHR1KE1HRTRYF3SAKHKI1FLVILE1NTIVAH3	N/A	N/A	N/A	N/A	N/A	N/A	N/A	N/A	92	92
CLIBASIA_02855	0	CLIBASIA_02855	P0A1C1#PHI:9923#Spa47#623#Shigella_flexneri#reduced_virulence__loss_of_pathogenicity__unaffected_pathogenicity	P0A1C1#PHI:9923#Spa47#623#Shigella_flexneri#reduced_virulence__loss_of_pathogenicity__unaffected_pathogenicity	0	0	P0A1C1#PHI:9923#Spa47#623#Shigella_flexneri#reduced_virulence__loss_of_pathogenicity__unaffected_pathogenicity	P0A1C1#PHI:9923#Spa47#623#Shigella_flexneri#reduced_virulence__loss_of_pathogenicity__unaffected_pathogenicity	103	419	93	410	GRVINALGKPIDGDDSLGKGDLSMEIMSKVPPAMN-RQRVEKGFKTGIRVIDIFTPLCHGQRIGVFAGSGIGKSTLLSMFARSDCFDKVIISLVGERGREVREFIEDYLGDNLKKS--VVVVATSDESPILRKMAPLTAVTIAEYFSSKGDNVLLILDSITRFAHSIREIATNSGELPVARGYPTSVFSELPRLLERIGPSEKEKGNITAVISVLVDGDNHNDPIADSVRSILDGHIVLNRSLAEEGRYPPVDPLASVSRLADKAWSADEKKLVSSLTHLIHRFEETRDIRLIGGYRPGVDLILDKAVHQVPIIYDFLKQ	GAVVNPLGEVTDKFAVTDNSEILYRPVDNAPPLYSERAAIEKPFLTGIKVIDSLLTCGEGQRMGIFASAGCGKTFLMNMLIEHSGADIYVIGLIGERGREVTETV-DYLKNSEKKSRCVLVYATSDYSSVDRCNAAYIATAIAEFFRTEGHKVALFIDSLTRYARALRDVALAAGESPARRGYPVSVFDSLPRLLERPGKL-KAGGSITAFYTVLLEDDDFADPLAEEVRSILDGHIYLSRNLAQKGQFPAIDSLKSISRVFTQVVDEKHRIMAAAFRELLSEIEELRTIIDFGEYKPGENASQDKIYNKISVVESFLKQ	7e-74	239	611	320	41.88	134	181	195	4	5	60.94	44562	1	1RA1IV1AP2KEPVIT1GKDFDASVLTGDKNGSDELISLMYERIPMVSDKNVA2ALMYNS-E1QARAVI2GP1KL3RK3ISFLTLPTLCCGHE3IM1VI2GSSA1IC2STTF1LMSN1FLAIRESHDSCGFA1KIVYIV1SG1VI7RT1FTIVE-3GKDNNSLE3-R-C1VL1VY4EY1PSIVLD1KCMN1PALYTI1VTTA3YF1SRSTKE1DHNK1LA1IFLI2IL2FY1HRSAIL1EDIV1TLNASA2LS1VAAR4TV3SDES7IP1PKSLE-1EAKG1NS3VFIYST2VLDEGD1NDHFNA2IL1DESE9VY1NS1SN2EQEK1RQYF1PAVI1PS1AK1VI2LVAFDTKQAVWVSDAEDKEHKRKILMVASASALFTRHE1ILHSREFI2TL1D…	N/A	N/A	N/A	N/A	N/A	N/A	N/A	N/A	72	72
CLIBASIA_02100	0	CLIBASIA_02100	P9WQD6#PHI:4196#KasB#1773#Mycobacterium_tuberculosis#reduced_virulence	P9WQD6#PHI:4196#KasB#1773#Mycobacterium_tuberculosis#reduced_virulence	0	0	P9WQD6#PHI:4196#KasB#1773#Mycobacterium_tuberculosis#reduced_virulence	P9WQD6#PHI:4196#KasB#1773#Mycobacterium_tuberculosis#reduced_virulence	4	419	13	417	VVVTGLGMITPLGCGVDVSWSRLIAGEVGIRHLD----QKFDLEGLSSKIAGLIPVGNGSDGTFNYEDWILSSDLRKIDQFILYGMVASDMALADSGWAPKTDKDRNSTGVVFGSGMGGLNRIVESSNVLRDGGPRKISPFTVPGSIISLLSGNISIRNQLRGPNHAVTTACSSGAHAIGDASRLIAFGDADVMVAGGAEAPICRLGVASFAACRALSTRFNDDPTRASRPFDQDRDGFVMGEGAGALVLEDLEHAKARGAKIYSEIIGYGLSGDAFHITMPPEDGNGAYRCMSSAIARAKLLPSDIDYINAHGTST-IADTIELGAVERLMGDSCYHVSMSSTKSAMGHLLGAAGAVEAAICNLAIRDGIVPATLNLDNPAKKTFIDLVPHRAIKKNV…	VVVTGIAMTTALATDAETTWKLLLDRQSGIRTLDDPFVEEFDL-----------PVRIGGHLLEEFDHQLTRIELRRMGYLQRMSTVLSRRLWENAG-SPEVDTNR--LMVSIGTGLGSAEELVFSYDDMRARGMKAVSPLTVQKYMPNGAAAAVGLERHAKAGVMTPVSACASGAEAIARAWQQIVLGEADAAICGGVETRIEAVPIAGFAQMRIVMSTNNDDPAGACRPFDRDRDGFVFGEGGALLLIETEEHAKARGANILARIMGASITSDGFHMVAPDPNGERAGHAITRAIQLAGLAPGDIDHVNAHATGTQVGDLAEGRAINNALGGN--RPAVYAPKSALGHSVGAVGAVESILTVLALRDQVIPPTLNLVNLDPEIDLDVVAGEPRPGNY…	1e-73	238	607	421	35.63	150	250	226	6	21	53.68	44562	1	5LIGA1IT1PA1GACTGDVADEVTST1SKRL1ILADGREQVS3HT2-D-P-F-VQEKE3E-G-L-S-S-K-I-A-G-L-I-2GRNI1SGDHGLTLFENEYFEDDHWQILLTSRSIDE2KRIMDGQYFLIQLRYMGSMT1AL1DRMRALLWAEDNSA1W-AS1KETV1KTDN1N-S-TLGM1VSFI1ST1ML1GSLANEREIL1EF1SYNDVDLM1DAGR1PMRKKAIV2FL2PQGKSYIMIPSNLGLASAGANAIVSGILRENRQHLARKGAPGNVHMATVPTVTS2SA3HE2GADR1SWRQLQ1AVFL1DE2VAMAVIAC2AV1ATPR1CERALVGPVI1SG2AQCM1AILVSMTSRTFN4TARG1SC4QR6MF3AGGAAL1VLLI1DTLE8KN1YLS…	N/A	N/A	N/A	N/A	N/A	N/A	N/A	N/A	98	98
CLIBASIA_03555	0	CLIBASIA_03555	Q5HF73#PHI:10348#AccD#1280#Staphylococcus_aureus#reduced_virulence	Q5HF73#PHI:10348#AccD#1280#Staphylococcus_aureus#reduced_virulence	0	0	Q5HF73#PHI:10348#AccD#1280#Staphylococcus_aureus#reduced_virulence	Q5HF73#PHI:10348#AccD#1280#Staphylococcus_aureus#reduced_virulence	21	278	25	279	IPENLWVKCPETGAMVYHKDLKENQWVISSSDFHMKIPAKERLKFLFDNAKYCLLDQPQVCQDPLKFRDNKKYIDRLKENRSKTGLIDSIVSAVGNVRDFKLVAVVHEFSFIGGSIGIAAGEAIVKSCERAIAEKCPLVMFTASGGARMQEGILSLMQLPRTTIAINMLKDAGLPYIVVLTNPTTGGVTASYAMLGDIHLAEPGAEIGFAGRRVIEQTVREKLPDGFQRSEYLVEHGMIDRIVHRHDIPEVVSSLCKI	VPAGIMTKCPKCKKIMYTKELAENLNVCFNCDHHIALTAYKRIEAISDEGSFTEFDKGMTSANPLDF---PSYLEKIEKDQQKTGLKEAVVTGTAQLDGMKFGVAVMDSRFRMGSMGSVIGEKICRIIDYCTENRLPFILFSASGGARMQEGIISLMQMGKTSVSLKRHSDAGLLYISYLTHPTTGGVSASFASVGDINLSEPKALIGFAGRRVIEQTINEKLPDDFQTAEFLLEHGQLDKVVHRNDMRQTLSEILKI	2e-73	228	582	258	41.86	108	147	170	1	3	65.89	44562	1	IV1EANGLIWMVT3EKTCGKAKMIVM1HT1DE1KA2QLWN1ICSFSNSC1FH1MIKAILPT1KYEK1LIKEFALIFS1NEAGKSYFCTLELF1QKPGQMVTCSQADN2KD1R-D-N-KPKS1ILDERKLIKEEKNDRQSQ4IKDESAIV1STAGVTGANQVLRDDGFM1LFVGAVVA1HMEDFSSR1IRGM2IM1ISAVAI2AK1VCKRSICIEDRYACITAEENKRCL1LFVIML1TS11LI4LMPGRK1TSIVASILNKMRLHKS4PL2VSVY2NH6TS2YF1MSLV3HN1AS2GK1EL12VIRN5GD2RTSA1YF1VL3MQIL1RKIV3HN1IMPREQVTVL1SELICL2	N/A	N/A	N/A	N/A	N/A	N/A	N/A	N/A	91	91
[truncated: 1,822 more rows]

## Sheet: Sheet3
CLIBASIA_00110
CLIBASIA_00230
CLIBASIA_00325
CLIBASIA_00375
CLIBASIA_00590
CLIBASIA_00775
CLIBASIA_00780
CLIBASIA_01060
CLIBASIA_01635
CLIBASIA_01765
CLIBASIA_01790
CLIBASIA_02520
CLIBASIA_03375
CLIBASIA_03720
CLIBASIA_03750
CLIBASIA_03870
CLIBASIA_03930
CLIBASIA_04230
CLIBASIA_04460
CLIBASIA_04725
CLIBASIA_04765
CLIBASIA_04805
CLIBASIA_02710
CLIBASIA_03495
CLIBASIA_01495
CLIBASIA_04210
CLIBASIA_04630
CLIBASIA_00385
CLIBASIA_02160
CLIBASIA_02785
CLIBASIA_01275
CLIBASIA_04375
CLIBASIA_03505
[truncated: 276 more rows]
